# Supplementary material for: Do you even exercise, ref? Exploring habits of Spanish basketball referees during practice and matches
Source: PeerJ. 2024 Jan 29;12:e16742. doi: 10.7717/peerj.16742 (PMC10832620; doi:10.7717/peerj.16742)
Supplement: Supplemental Information 1 [file peerj-12-16742-s001.xlsx]

## Sheet: Respuestas de formulario 1
Timestamp (MM/DD/YYYY; HH:MM:SS)	Declaration of informed consent. Having been informed of the objective and purpose of the research, and the conditions of its participation, do you wish to participate?	Age (y)	Sex*	Height (cm)*	Weight (Kg)*	Place of habitual residence (City, Province)*	Refereeing experience*. You can indicate several options	Please specify how many years of experience for each of the previously chosen options. For example: Local (20 years), Regional (19 years), National (10 years), International (no experience)*	Based on which season are you going to answer the following questions? (whenever possible, answer based on a pre-pandemic season)*	Type of refereed competitions	Weekly frequency of refereed games*	In which category have you officiated? (Spanish League, Group 1, Group 2, etc.). Indicate all the categories where you have refereed during the season you have previously chosen (for example, 2019-2020)	Do you engage in physical exercise (planned, structured, repetitive physical activity that promotes the maintenance or development of physical fitness) regularly? For example, going for a run or cycling, working out at the gym, swimming in the pool, etc.?	Do you have a personal fitness trainer?	What kind of physical exercise do you usually do? You can select more than one type	On a typical day, could you indicate how much time you spend on this physical exercise?	a typical week, could you indicate how many days a week you do this physical exercise?	Do you have any physical warm-up routine before starting to officiate a game?	If so, how much time do you spend on this physical routine? Please indicate a specific number of minutes (for example, 3 minutes, or 20 minutes), or a range of minutes (for example, 5-10 minutes, or more than 15 minutes, etc.)	During the break of the games (between halves), do you have an exercise routine to reactivate physically?*	If so, please indicate what kind of activities you perform (you can check several options)	If so, could you indicate the reason(s) for physically reactivating during the break between halves?		In relation to stretching and/or joint mobility exercises, when do you perform them? (you can check several options)*	Finally, if you have answered that you never perform stretching and/or joint mobility exercises, could you indicate the reason(s) for this?	COMMENTS
2021-08-26 19:25:35	Yes	55	Men	188	98	A Coruña	National, International	National (28 years) International (18 years)	2020-2021	Senior category	Between 2 and 3 games/week	ACB EUROLEAGUE EUROCUP	Yes	No	To maintain or develop aerobic resistance (swimming, cycling, career, jumping, etc.), to maintain or develop muscle strength (different muscle strengthening techniques with machines, with free weight, with body weight itself, with elastic gums, etc.), to maintain or develop speed (ability to perform sprints in the shortest possible time and repeat them the largest number of times), to maintain or…	Between 45 and 60 minutes	4-5 days	Yes	15 minutes	No			Lack of habit	During the initial warm-up, During the break between halves, At the end of the game
2021-08-26 19:32:01	Yes	24	Men	185	73	Vilagarcía de Arousa, Pontevedra	Regional	Local (1 year), Regional (2 years)	2018-2019	Senior category, Youth categories	Between 5 and 6 games/week	Sub 23 Galicia category	Yes	Yes	To maintain or develop aerobic resistance (swimming, cycling, career, jumping, etc.), to maintain or develop muscle strength (different muscle strengthening techniques with machines, with free weight, with body weight itself, with elastic gums, etc.), to maintain or develop speed (ability to perform sprints in the shortest possible time and repeat them the largest number of times), to maintain or…	More than 60 minutes	6-7 days	Yes	15 minutes	No			Game report, game talk etc	During the initial warm-up
2021-08-26 19:33:11	Yes	31	Men	181	77	Lugo	Regional	8 years	2020-2021	Senior category, Youth categories	Between 5 and 6 games/week	Group 1 FGB	Yes	Yes	To maintain or develop muscle strength (different muscle strengthening techniques with machines, with free weight, with body weight itself, with elastic rubber, etc.), to maintain or develop speed (ability to perform sprints in the shortest possible time possible and repeat them the greatest number of times)	Between 45 and 60 minutes	4-5 days	Yes	15 minutes	No			Concentration	At the end of the game
2021-08-26 19:33:16	Yes	22	Men	173	69	Ourense Ourense	Local, Regional	Local (4) Regional (1)	2020-2021	Senior category, Youth categories	Between 4 and 5 games/week	Group 2	Yes	No	To maintain or develop aerobic resistance (swimming, cycling, career, jumping, etc.), to maintain or develop muscle strength (different muscle strengthening techniques with machines, with free weight, with body weight itself, with elastic gums, etc.), to maintain or develop other capacities (coordination, balance, agility)	More than 60 minutes	6-7 days	Yes	10 minutes	No			Normally we go to the locker rooms to discuss technical issues and in 10 minutes I do not need to reactivate	During the initial warm-up
2021-08-26 19:34:03	Yes	22	Men	170	65	Ourense	Local, Regional	Local( 2 years) Regional ( 5 years)	2020-2021	Senior category, Youth categories	Between 5 and 6 games/week	Group 1	Yes	No	To maintain or develop aerobic resistance (swimming, cycling, career, jumping, etc.)	Between 45 and 60 minutes	2-3 days	Yes	5 minutes warm-up	No			It is something that has to be solved since it is very likely not to re-start the game properly and, in some cases, injuries may appear	During the initial warm-up, At the end of the game
2021-08-26 19:34:14	Yes	40	Women	169	62	Outeiro de Rei, Lugo	Local, Regional	Local 6 years, Regional 3 years	2018-2019	Senior category, Youth categories	Between 6 and 7 games/week	FGB Group 1	Yes	No	To maintain or develop aerobic resistance (swimming, cycling, career, jumping, etc.), to maintain or develop muscle strength (different muscle strengthening techniques with machines, with free weight, with body weight itself, with elastic gums, etc.), to maintain or develop flexibility (either with the body, help from another person, or with elements such as towels, elastic rubber, foam roller, e…	Between 30 and 45 minutes	4-5 days	Yes	5-10 minutes	No			I do not consider it necessary or have not consider it	During the initial warm-up, At the break between the first and second quarters, During the break between halves, At the break between the third and last quarter, At the end of the game
2021-08-26 19:34:26	Yes	33	Men	174	70	Pontevedra	Regional	14 y	2020-2021	Senior category, Youth categories	Between 4 and 5 games/week	Group 1	Yes	No	To maintain or develop aerobic resistance (swimming, cycling, career, jumping, etc.), to maintain or develop muscle strength (different muscle strengthening techniques with machines, with free weight, with body weight itself, with elastic rubber, etc.)	Between 45 and 60 minutes	6-7 days	Yes	10 minutes	No			I consider that I do not lose physical activation during those 10 minutes	During the initial warm-up, At the end of the game
2021-08-26 19:35:31	Yes	27	Men	172	72	Noia (A Coruña)	Local, Regional, National	Local (4 years); Regional (3 years); National (1 year)	2019-2020	Senior category, Youth categories	Between 6 and 7 games/week	All at the regional and local level, both senior and lower categories	Yes	No	To maintain or develop aerobic resistance (swimming, cycling, career, jumping, etc.), to maintain or develop muscle strength (different muscle strengthening techniques with machines, with free weight, with body weight itself, with elastic rubber, etc.)	More than 60 minutes	4-5 days	No		No			Insufficient time	During the initial warm-up
2021-08-26 19:38:31	Yes	47	Men	187	93	Vigo, Pontevedra	Local, Regional	Local (4 years) Regional (21 years)	2018-2019	Senior category, Youth categories	Between 4 and 5 games/week	Group 1 (Galician Committee)	No	No				Yes	5 minutes	No			They are 10 minutes of rest. Talk with partner + official talk does not give time. Priority is ​​game control	During the initial warm-up, At the end of the game		The pre -season physical routine is different from that reflected here. In the months of July December and January I do routine physical work to maintain or recover the form. With 4-4 games on weekends during the week I dedicate myself to walk and follow a balanced diet.
2021-08-26 19:38:45	Yes	24	Women	177	68	Ferrol	Local	Local (3years)	2019-2020	Youth categories	Between 6 and 7 games/week	Sub23	Yes	No	To maintain or develop aerobic resistance (swimming, cycling, career, jumping, etc.), to maintain or develop muscle strength (different muscle strengthening techniques with machines, with free weight, with body weight itself, with elastic rubber, etc.)	Between 30 and 45 minutes	2-3 days	No		Yes	Strength exercise (jumps, push-ups, etc.), Stretches and joint mobility	To avoid losing temperature, I try to remain active for the second half		At the end of the game
2021-08-26 19:39:47	Yes	24	Women	159	51	A Coruña	Local, Regional	Local (5 years) Regional (2)	2018-2019	Senior category	Between 6 and 7 games/week	Zonal	Yes	No	To maintain or develop aerobic resistance (swimming, cycling, career, jumping, etc.), to maintain or develop muscle strength (different muscle strengthening techniques with machines, with free weight, with body weight itself, with elastic rubber, etc.)	Between 45 and 60 minutes	2-3 days	Yes	3 minutes	No			I prefer to talk to my colleagues about aspects of the game	At the end of the game
2021-08-26 19:42:33	Yes	27	Men	181	75	Ferrol	Regional	5 years	2019-2020	Senior category, Youth categories	7 or more games/week	Group 1	Yes	No	To maintain or develop aerobic resistance (swimming, cycling, career, jumping, etc.)	Between 30 and 45 minutes	2-3 days	No		No			Laziness	During the initial warm-up	I am not in need
2021-08-26 19:46:04	Yes	30	Men	188	85	Ferrol	Local, Regional	Local (5 years), Regional (2 years)	2020-2021	Senior category, Youth categories	Between 6 and 7 games/week	Lower categories, available group 1 fegaba	Yes	No	To maintain or develop aerobic resistance (swimming, cycling, career, jumping, etc.), to maintain or develop muscle strength (different muscle strengthening techniques with machines, with free weight, with body weight itself, with elastic rubber, etc.)	Between 45 and 60 minutes	2-3 days	No		No			I always see myself active, I don't usually lose activation during the break	Never
2021-08-26 19:46:47	Yes	21	Men	172	55	Lugo	Local, Regional	3 years Local and 3 years Regional	2020-2021	Senior category, Youth categories	Between 3 and 4 games/week	Sub23 FGB category	No					Yes	5 minutes	Yes	Stretches and joint mobility	Two reasons: enter physically activated and concentrated		During the initial warm-up, During the break between halves, At the end of the game
2021-08-26 19:50:49	Yes	28	Men	182	92	Baiona	Local, Regional, National	Local ( 8 years), regional (6 years), National (1 year)	2018-2019	Senior category, Youth categories	7 or more games/week	GROUP 1 GALLEGO	Yes	No	To maintain or develop aerobic resistance (swimming, cycling, career, jumping, etc.), to maintain or develop muscle strength (different muscle strengthening techniques with machines, with free weight, with body weight itself, with elastic gums, etc.), to maintain or develop speed (ability to perform sprints in the shortest possible time and repeat them the largest number of times), to maintain or…	Between 45 and 60 minutes	2-3 days	Yes	5-10 minutes	No			I have answered NO because I do not have a routine, some stretching and something brief AS activation is usually done, especially with long breaks. Normally I do not usually lose temperature.	During the initial warm-up, During the break between halves, At the end of the game
2021-08-26 20:00:50	Yes	31	Men	180	87	Oleiros, A Coruña	Local, Regional	Local (7years), Regional (3 years), National (without experience), International (without experience)	2020-2021	Senior category, Youth categories	Between 6 and 7 games/week	Group 1 Galician Basketball Federation	Yes	No	To maintain or develop aerobic resistance (swimming, cycling, career, jumping, etc.), to maintain or develop muscle strength (different muscle strengthening techniques with machines, with free weight, with body weight itself, with elastic rubber, etc.)	Between 45 and 60 minutes	2-3 days	Yes	5 minutes	No			The rest time is insufficient to perform these exercises after commenting on the technical aspects with the rest of the officiating team.	During the initial warm-up	To stretch my legs especially if I have to travel by car
2021-08-26 20:03:43	Yes	21	Men	175	80	Burela	Local, Regional	Local (1 year) Regional (1year)	2020-2021	Youth categories	Between 2 and 3 games/week	initiation	Yes	No	To maintain or develop aerobic resistance (swimming, cycling, career, jumping, etc.)	Between 45 and 60 minutes	2-3 days	No		No	Stretches and joint mobility, Breath management techniques (activation/relaxation, awareness)	If I have to travel tired and I need to heat	Even if I rest, my body usually stays active	Never
2021-08-26 20:10:11	Yes	24	Men	184	69	Sarria, Lugo	Local, Regional	Local (3 years), Regional (3 years)	2018-2019	Senior category, Youth categories	Between 6 and 7 games/week	Zonal and Infant/Cadet/Junior Autonomic	Yes	No	To maintain or develop muscle strength (different muscle strengthening techniques with machines, with free weight, with body weight itself, with elastic rubber, etc.)	More than 60 minutes	4-5 days	Yes	10-15 minutes	Yes	Stretches and joint mobility	Try to activate again ankles, back, legs ...		During the initial warm-up, During the break between halves, At the end of the game
2021-08-26 20:29:59	Yes	28	Men	185	77	A Coruña, A Coruña	Local, Regional	Local (5 years), Regional (1 year)	2018-2019	Senior category, Youth categories	7 or more games/week	Sub 23 until this season, this season linked to Autonomic Group 1	Yes	No	To maintain or develop muscle strength (different muscle strengthening techniques with machines, with free weight, with body weight itself, with elastic rubber, etc.)	Less than 15 minutes	4-5 days	No		No			It is not necessary, due to the large number of matches that I officiate I prefer to rest	At the end of the game	To keep the muscle warmed
2021-08-26 20:32:06	Yes	39	Women	157	54	Baiona	Regional	Local/Regional 16	2020-2021	Senior category	Between 3 and 4 games/week	Regional Galicia	Yes	Yes	To maintain or develop muscle strength (different muscle strengthening techniques with machines, with free weight, with body weight itself, with elastic rubber, etc.), to maintain or develop speed (ability to perform sprints in the shortest possible time possible and to repeat them the greatest number of times), to maintain or develop flexibility (either with the body itself, help from another pe…	More than 60 minutes	4-5 days	Yes	6-9 minutes	Yes	Stretches and joint mobility	To keep me active		At the break between the third and last quarter, At the end of the game
2021-08-26 20:36:58	Yes	22	Men	185	75	Vigo, Pontevedra	Regional	Local (2 years), Regional (2 years), National/International (without experience)	2020-2021	Senior category, Youth categories	Between 4 and 5 games/week	Zonal	Yes	No	To maintain or develop aerobic resistance (swimming, cycling, career, jumping, etc.), to maintain or develop muscle strength (different muscle strengthening techniques with machines, with free weight, with body weight itself, with elastic rubber, etc.)	More than 60 minutes	6-7 days	No		No				During the initial warm-up, During the break between halves
2021-08-26 21:00:13	Yes	31	Men	180	72	Vigo	Local, Regional	Local (3 years), Regional (2 years)	2018-2019	Senior category, Youth categories	Between 6 and 7 games/week	Group 1	Yes	Yes	To maintain or develop aerobic resistance (swimming, cycling, career, jumping, etc.), to maintain or develop muscle strength (different muscle strengthening techniques with machines, with free weight, with body weight itself, with elastic gums, etc.), to maintain or develop speed (ability to perform sprints in the shortest possible time and repeat them the largest number of times)	More than 60 minutes	4-5 days	Yes	3 minutes	No				During the initial warm-up, During the break between halves
2021-08-26 21:25:37	Yes	52	Men	180	86	Lugo	Regional, National	Regional 27, National 2	2019-2020	Senior category, Youth categories	Between 5 and 6 games/week	Autonomous	Yes	No	To maintain or develop aerobic resistance (swimming, cycling, career, jumping, etc.), to maintain or develop muscle strength (different muscle strengthening techniques with machines, with free weight, with body weight itself, with elastic gums, etc.), to maintain or develop flexibility (either with the body, help from another person, or with elements such as towels, elastic rubber, foam roller, e…	Between 45 and 60 minutes	4-5 days	Yes	5-10 minutes	No			Little time, I have to review the record and comment with a partner	At the end of the game
2021-08-26 21:38:49	Yes	48	Men	176	85	Lugo	Regional	Local 18 years, Regional 10 years	2018-2019	Senior category	Between 4 and 5 games/week	Group 1	No	No	To maintain or develop aerobic resistance (swimming, cycling, career, jumping, etc.)	Less than 15 minutes	1 day	Yes	5 minutes	No			I do not need it	During the initial warm-up
2021-08-26 22:31:06	Yes	47	Men	169	62	Santiago de Compostela ( A Coruña)	Regional	Local(3 years), Regional(21),National(6years)	2018-2019	Senior category	Between 2 and 3 games/week	Autonomic	Yes	No	To maintain or develop aerobic resistance (swimming, cycling, career, jumped to the commits, etc.), to maintain or develop speed (ability to perform sprints in the shortest possible time and repeat them the largest number of times)	Between 30 and 45 minutes	2-3 days	Yes	(5-10 minutes)	Yes	Stretches and joint mobility	Concentration		During the initial warm-up, During the break between halves, At the end of the game
2021-08-26 22:46:33	Yes	27	Women	164	64	Pontevedra	Local, Regional	Local and Regional (2 years)	2019-2020	Senior category, Youth categories	7 or more games/week	Galician Group	Yes	No	To maintain or develop aerobic resistance (swimming, cycling, career, jumping, etc.), to maintain or develop muscle strength (different muscle strengthening techniques with machines, with free weight, with body weight itself, with elastic gums, etc.), to maintain or develop other capacities (coordination, balance, agility)	Between 45 and 60 minutes	4-5 days	Yes	5-10 minutes	No			I don't need to do it, I'm usually still active at rest.	At the end of the game
2021-08-26 22:54:02	Yes	17	Men	170	55	A Coruña	Local	4 years	2019-2020	Youth categories	Between 5 and 6 games/week	Group 2	Yes	No	To maintain or develop aerobic resistance (swimming, cycling, career, jumping, etc.)	More than 60 minutes	4-5 days	No		No				During the initial warm-up
2021-08-26 23:39:57	Yes	19	Men	175	60	O Grove, Pontevedra	Local	5 years	2018-2019	Senior category, Youth categories	Between 3 and 4 games/week	Group 2 FGB	Yes	No	To maintain or develop aerobic resistance (swimming, cycling, career, jumping, etc.), to maintain or develop muscle strength (different muscle strengthening techniques with machines, with free weight, with body weight itself, with elastic gums, etc.), to maintain or develop speed (ability to perform sprints in the shortest possible time and repeat them the largest number of times)	Between 30 and 45 minutes	2-3 days	No		No			Due to my correct physical condition	At the end of the game
2021-08-26 23:46:09	Yes	50	Men	190	90	Vigo	Local, Regional	10 years Local 5 years Regional	2019-2020	Senior category, Youth categories	Between 6 and 7 games/week	Group 2	Yes	No	To maintain or develop aerobic resistance (swimming, cycling, career, jumping, etc.), to maintain or develop muscle strength (different muscle strengthening techniques with machines, with free weight, with body weight itself, with elastic rubber, etc.)	Between 30 and 45 minutes	2-3 days	Yes	3-5 minutes	No			I review the record of the game until that moment and comment with the colleagues the incidents of the first half	During the initial warm-up, At the end of the game
2021-08-27 00:11:51	Yes	34	Men	178	82	A Coruña	Regional	Local (11 years), regional (5 years), National (without exp), International (without experience)	2017-2018	Senior category, Youth categories	7 or more games/week	Even autonomic	Yes	No	To maintain or develop aerobic resistance (swimming, cycling, career, jumping, etc.), to maintain or develop muscle strength (different muscle strengthening techniques with machines, with free weight, with body weight itself, with elastic gums, etc.), to maintain or develop speed (ability to perform sprints in the shortest possible time and repeat them the largest number of times), to maintain or…	More than 60 minutes	4-5 days	Yes	5-15 minutes	No			Concentration, and mental rest	During the initial warm-up, At the end of the game
2021-08-27 08:26:05	Yes	26	Men	172	83	Vigo, Pontevedra	Local, Regional	Local (9 years), Regional (8 years)	2020-2021	Senior category, Youth categories	7 or more games/week	Group 1 FGB	Yes	No	To maintain or develop aerobic resistance (swimming, cycling, career, jumped to the commits, etc.), to maintain or develop speed (ability to perform sprints in the shortest possible time and repeat them the largest number of times)	Between 45 and 60 minutes	2-3 days	Yes	3 minutes	No	Jog or run, Running at maximum speed (sprinting), Stretches and joint mobility		Lack of time between halves and because I do not consider it necessary to reactivate, since I remain active	During the initial warm-up, During the break between halves
2021-08-27 08:27:22	Yes	20	Men	175	60	Vigo, Pontevedra	Regional	Local(without experience), Regional(4 years), National(without experience), International (without experience)	2018-2019	Senior category, Youth categories	Between 3 and 4 games/week	Fegaba Group 2	Yes	No	To maintain or develop aerobic resistance (swimming, cycling, career, jumping, etc.)	Between 30 and 45 minutes	4-5 days	Yes	5-10 minutes	No			Usually, I do not need it	During the initial warm-up
2021-08-27 09:32:37	Yes	32	Men	191	80	Vilagarcía, Pontevedra	Local, Regional	Local (7 years), Regional (3 years)	2020-2021	Senior category, Youth categories	Between 5 and 6 games/week	Group 1	Yes	No	To maintain or develop aerobic resistance (swimming, cycling, career, jumping, etc.), to maintain or develop muscle strength (different muscle strengthening techniques with machines, with free weight, with body weight itself, with elastic rubber, etc.)	More than 60 minutes	4-5 days	Yes	10-15 minutes	No			Priority to use that time in dealing with technical issues of refereeing	During the initial warm-up, During the break between halves, At the end of the game
2021-08-27 11:12:51	Yes	31	Women	169	54	A Coruña	Regional	3 years	2020-2021	Senior category, Youth categories	Between 5 and 6 games/week	Available Group 1 FGB	Yes	No	To maintain or develop aerobic resistance (swimming, cycling, career, jumping, etc.), to maintain or develop muscle strength (different muscle strengthening techniques with machines, with free weight, with body weight itself, with elastic gums, etc.), to maintain or develop flexibility (either with the body, help from another person, or with elements such as towels, elastic rubber, foam roller, e…	Between 45 and 60 minutes	2-3 days	Yes	4 minutes	No			Prioritize other game issues	At the end of the game
2021-08-27 13:54:14	Yes	26	Men	174	73	Vigo	Local, Regional	Local(3 years), regional(1 year)	2019-2020	Senior category, Youth categories	Between 4 and 5 games/week	Fegaba Group 2	Yes	No	To maintain or develop aerobic resistance (swimming, cycling, career, jumped to the commons, etc.), to maintain or develop speed (ability to perform sprints in the shortest possible time and repeat them the greatest number of times), for maintain or develop other capacities (coordination, balance, agility)	Between 30 and 45 minutes	4-5 days	No		No			Comfort and need to speak aspects of the game	At the end of the game
2021-08-27 23:30:23	Yes	41	Men	177	83	Santiago de Compostela, A Coruña	Regional	Local (4years) and Regional (21 years)	2019-2020	Senior category	Between 2 and 3 games/week	Group 1 of the Galician Basketball Federation	Yes	No	To maintain or develop aerobic resistance (swimming, cycling, career, jumping, etc.)	Between 30 and 45 minutes	1 day	Yes	5 minutes	No	Jog or run		In ten minutes we don't have time	During the initial warm-up
2021-08-28 13:20:04	Yes	24	Men	176	70	A Coruña	Regional	Local (5 years) Regional (2 years) National (without experience) International (without experience)	2018-2019	Youth categories	Between 4 and 5 games/week	2018-2019: Initiation	Yes	No	To maintain or develop aerobic resistance (swimming, cycling, career, jumped to the commits, etc.), to maintain or develop speed (ability to perform sprints in the shortest possible time and repeat them the largest number of times)	Between 15 and 30 minutes	2-3 days	Yes	3-10 minutes	No			I simply forget and do not have time many times, when discussing on the game with the partners, review the records, correct it if necessary, fill out the report of the back of the record if necessary, comment how we will focus the next half of the game and go to the bathroom. All this takes a long time.	During the initial warm-up, At the end of the game
2021-08-28 19:51:49	Yes	29	Men	165	65	Vilagarcía de Arousa, Pontevedra	Local, Regional	Local (8 years) regional (6 years)	2020-2021	Senior category, Youth categories	Between 5 and 6 games/week	Group 1	Yes	No	To maintain or develop aerobic resistance (swimming, cycling, career, jumping, etc.), to maintain or develop muscle strength (different muscle strengthening techniques with machines, with free weight, with body weight itself, with elastic gums, etc.), to maintain or develop speed (ability to perform sprints in the shortest possible time and repeat them the largest number of times), to maintain or…	More than 60 minutes	6-7 days	Yes	5-10 minutes	No			I do not consider it necessary at least in most matches	During the initial warm-up, At the end of the game
2021-09-04 10:20:33	Yes	48	Men	178	130	Pamplona	Local, Regional, National	Local and Regional (14 years), National (12 years)	2018-2019	Senior category, Youth categories	Between 3 and 4 games/week	National	No	No	To maintain or develop aerobic resistance (swimming, cycling, career, jumping, etc.)	Between 45 and 60 minutes	1 day	Yes	3-4 minutes	No			Start recovered the second half of the game	During the initial warm-up, At the end of the game
2021-09-04 10:40:51	Yes	48	Men	180	79	San Sebastián	National	20 y	2020-2021	Senior category	1 game/week	ACB	Yes	No	To maintain or develop aerobic resistance (swimming, cycling, career, jumping, etc.), to maintain or develop muscle strength (different muscle strengthening techniques with machines, with free weight, with body weight itself, with elastic gums, etc.), to maintain or develop speed (ability to perform sprints in the shortest possible time and repeat them the largest number of times), to maintain or…	Between 45 and 60 minutes	4-5 days	Yes	30 minutes	No				At the end of the game
2021-09-04 16:39:19	Yes	34	Men	173	67	pamplona	Local, Regional, National	2 Local, 2 Regional, 5 National	2020-2021	Senior category, Youth categories	Between 4 and 5 games/week	School, regional, regional, national	Yes	No	To maintain or develop aerobic resistance (swimming, cycling, career, jumping, etc.), to maintain or develop muscle strength (different muscle strengthening techniques with machines, with free weight, with body weight itself, with elastic gums, etc.), to maintain or develop speed (ability to perform sprints in the shortest possible time and repeat them the largest number of times), to maintain or…	More than 60 minutes	6-7 days	Yes	12 minutes	No			Rest and muscle relaxation	During the initial warm-up, At the end of the game
2021-09-04 16:45:13	Yes	51	Men	182	95	Bizkaia	Local, Regional, National	Local (4 years) , Regional (3 years), National (26 years)	2018-2019	Senior category, Youth categories	Between 3 and 4 games/week	Group 3, Basque Federation	Yes	No	To maintain or develop aerobic resistance (swimming, cycling, career, jumping, etc.)	Between 45 and 60 minutes	2-3 days	No	5 minutes	Yes	Stretches and joint mobility	Prepare the muscles for the rhythm of the second half		During the break between halves, At the end of the game
2021-09-04 16:45:15	Yes	47	Men	191	115	Pamplona	Local, Regional, National	13 years (Local, regional and National)	2018-2019	Senior category, Youth categories	Between 3 and 4 games/week	2018-19 Group 4	Yes	No	To maintain or develop aerobic resistance (swimming, cycling, career, jumping, etc.), to maintain or develop muscle strength (different muscle strengthening techniques with machines, with free weight, with body weight itself, with elastic gums, etc.), to maintain or develop speed (ability to perform sprints in the shortest possible time and repeat them the largest number of times), to maintain or…	More than 60 minutes	4-5 days	Yes	10 minutes	No			I do not need it. I breathe, I drink water or some other drink, or eat a banana ... in the locker room I prefer stretching and resting in a seated position.	During the initial warm-up, During the break between halves, At the end of the game
2021-09-04 16:50:54	Yes	22	Men	183	74	Las Palmas de GC	Regional	Local(4 years), Regional (3 years)	2018-2019	Youth categories	Between 6 and 7 games/week	Group 2 FCB	Yes	No	To maintain or develop muscle strength (different muscle strengthening techniques with machines, with free weight, with body weight itself, with elastic rubber, etc.)	More than 60 minutes	4-5 days	Yes	4 minutes	No			I usually use most of the time to assess the work done.	At the end of the game
2021-09-04 16:50:59	Yes	28	Men	173	81	Santa Cruz de Tenerife	Local, Regional	Local (8 years), Regional (3 years), National (without experience) e International (without experience)	2019-2020	Senior category, Youth categories	7 or more games/week	Group 1 Canary Basketball Federation	No	No	To maintain or develop muscle strength (different muscle strengthening techniques with machines, with free weight, with body weight itself, with elastic rubber, etc.), to maintain or develop speed (ability to perform sprints in the shortest possible time possible and to repeat them the greatest number of times), to maintain or develop flexibility (either with the body itself, help from another pe…	Between 15 and 30 minutes	2-3 days	Yes	3-5 minutes	No			I am not aware of it	During the initial warm-up, During the break between halves
2021-09-04 16:51:36	Yes	29	Men	185	78	Andoain	Regional	Local 8 years y Regional 4 years	2018-2019	Senior category	Between 6 and 7 games/week	Group 3	Yes	No	To maintain or develop muscle strength (different muscle strengthening techniques with machines, with free weight, with body weight itself, with elastic rubber, etc.)	Between 45 and 60 minutes	4-5 days	Yes	5 minutes	Yes	Stretches and joint mobility	So that muscles do not lose much temperature		During the initial warm-up, During the break between halves, At the end of the game
2021-09-04 16:53:38	Yes	25	Men	187	73	San Cristóbsl de la Laguna , Tenerife	Regional	Local 7 Regional 6	2018-2019	Senior category	7 or more games/week	Group 2 FCB	Yes	No	To maintain or develop flexibility (either with the body itself, help from another person, or with elements such as towels, elastic rubber, foam roller, etc.)	Between 15 and 30 minutes	2-3 days	Yes	5-10 minutes	Yes	Stretches and joint mobility, Breath management techniques (activation/relaxation, awareness)	The body relaxes and because we will continue to make great physical effort, it is good to reactivate the body to avoid injury		During the initial warm-up, During the break between halves, At the end of the game
2021-09-04 16:54:17	Yes	21	Men	173	64	San Cristobal de La Laguna	Regional	Regional 4 years	2019-2020	Senior category	Between 6 and 7 games/week	FCB Group 2	Yes	No	To maintain or develop muscle strength (different muscle strengthening techniques with machines, with free weight, with body weight itself, with elastic rubber, etc.), to maintain or develop flexibility (either with the body itself, help from Another person, or with elements such as towels, elastic tires, foam roller, etc.)	Between 45 and 60 minutes	4-5 days	Yes	8-15 minutes	Yes	Strength exercise (jumps, push-ups, etc.), Stretches and joint mobility, Breath management techniques (activation/relaxation, awareness)	Not to enter cold and at the same time concentrate again		During the initial warm-up, During the break between halves, At the end of the game
2021-09-04 16:54:48	Yes	37	Men	186	79	Las Palmas de Gran Canaria	National	Local (2 years), Regional (3 years), National (7 years)	2018-2019	Senior category, Youth categories	Between 5 and 6 games/week	Insular, Autonomic, Geb Group 2	Yes	No	To maintain or develop aerobic resistance (swimming, cycling, career, jumping, etc.), to maintain or develop muscle strength (different muscle strengthening techniques with machines, with free weight, with body weight itself, with elastic gums, etc.), to maintain or develop flexibility (either with the body, help from another person, or with elements such as towels, elastic rubber, foam roller, e…	Between 45 and 60 minutes	4-5 days	Yes	3-4 minutes	No			Lack of time, since between the review of the record, go and return to locker rooms, comment on situations with respect to the other person ...	During the initial warm-up, During the break between halves
2021-09-04 16:55:10	Yes	24	Men	179	106	La Orotava, Santa Cruz de Tenerife	Local	Local (3 years), Regional (without experience), National (without experience), International (without experience)	2019-2020	Youth categories	Between 6 and 7 games/week	All categories below Senior (not including) at the insular/provincial level.	Yes	No	To maintain or develop aerobic resistance (swimming, cycling, career, jumping, etc.), to maintain or develop muscle strength (different muscle strengthening techniques with machines, with free weight, with body weight itself, with elastic rubber, etc.)	More than 60 minutes	2-3 days	Yes	1-3 minutes	Yes	Stretches and joint mobility	To avoid losing temperature in the joints.		During the initial warm-up, During the break between halves
2021-09-04 16:55:37	Yes	56	Men	178	75	Logroño la Rioja	National	10 years	2018-2019	Senior category	7 or more games/week	Group 3	Yes	No	To maintain or develop speed (ability to perform sprints in the shortest possible time and repeat them the largest number of times)	Between 45 and 60 minutes	2-3 days	No		No			I prefer to eat some fruit and talk about the game	At the end of the game
2021-09-04 16:55:50	Yes	29	Men	180	65	Las Palmas de Gran Canaria, Las Palmas	Local, Regional	Local (5 years), Regional (4 years)	2018-2019	Youth categories	7 or more games/week	Group 2 FCB	Yes	No				Yes	3-5 minutes	No			Physically I feel good, and I do not see the need to reactivate, although I may be wrong	During the initial warm-up, At the end of the game
2021-09-04 16:58:41	Yes	35	Men	173	66	Durango	Regional	Regional (12 years) Local (14 years)	2020-2021	Senior category	Between 2 and 3 games/week	Group 3	Yes	Yes	To maintain or develop muscle strength (different muscle strengthening techniques with machines, with free weight, with body weight itself, with elastic rubber, etc.)	Between 45 and 60 minutes	4-5 days	No		No				During the initial warm-up
2021-09-04 16:58:51	Yes	30	Men	172	72	Las Palmas de Gran Canaria	Regional	Local (5 years), Regional (2 years)	2019-2020	Senior category, Youth categories	Between 6 and 7 games/week	Group 2 FCB	Yes	No	To maintain or develop aerobic resistance (swimming, cycling, career, jumping, etc.), to maintain or develop muscle strength (different muscle strengthening techniques with machines, with free weight, with body weight itself, with elastic gums, etc.), to maintain or develop speed (ability to perform sprints in the shortest possible time and repeat them the largest number of times)	Between 30 and 45 minutes	2-3 days	Yes	4-6 minutes	Yes	Strength exercise (jumps, push-ups, etc.), Stretches and joint mobility	After the break it is a critical moment that may be important to control, some advantage in the score etc etc		During the initial warm-up, During the break between halves, At the end of the game	No habit
2021-09-04 16:59:15	Yes	42	Men	175	78	Alegría Dulantzi	National	5 years	2020-2021	Senior category	Between 2 and 3 games/week	Group 3	Yes	No	To maintain or develop aerobic resistance (swimming, cycling, career, jumping, etc.), to maintain or develop muscle strength (different muscle strengthening techniques with machines, with free weight, with body weight itself, with elastic rubber, etc.)	Between 45 and 60 minutes	2-3 days	No		No			No habit	At the end of the game
2021-09-04 16:59:19	Yes	26	Men	184	83	Barañáin	Local, Regional, National	Local(9years) regional(5years) National (4years)	2019-2020	Senior category	Between 2 and 3 games/week	National	Yes	No	To maintain or develop aerobic resistance (swimming, cycling, career, jumping, etc.), to maintain or develop muscle strength (different muscle strengthening techniques with machines, with free weight, with body weight itself, with elastic rubber, etc.)	Between 45 and 60 minutes	2-3 days	Yes	5 minutes	No			I am physically active	During the initial warm-up
2021-09-04 17:02:25	Yes	32	Men	192	94	Las Palmas	Regional	4 years	2018-2019	Youth categories	Between 5 and 6 games/week	Autonomic and insular group	Yes	Yes	To maintain or develop muscle strength (different muscle strengthening techniques with machines, with free weight, with body weight itself, with elastic rubber, etc.)	Between 45 and 60 minutes	4-5 days	Yes	10-15 minutes	Yes	Stretches and joint mobility	To avoid rapid cooling of joints and activation of muscles to avoid possible rotter or pulls		During the initial warm-up, During the break between halves		Personally I would add the type of food you consume before each game and in what quantity, if you consume soft drinks often and do any yoga practice or perform extra stretching at home to prevent injuries before or after officiating.
2021-09-04 17:02:40	Yes	51	Men	176	85	Vitoria-gasteiz	Local, Regional, National	Total 33 years experience	2018-2019	Senior category, Youth categories	Between 4 and 5 games/week	Group 3 Basque Country	Yes	No	To maintain or develop aerobic resistance (swimming, cycling, career, jumping, etc.), to maintain or develop muscle strength (different muscle strengthening techniques with machines, with free weight, with body weight itself, with elastic gums, etc.), to maintain or develop flexibility (either with the body, help from another person, or with elements such as towels, elastic rubber, foam roller, e…	More than 60 minutes	2-3 days	Yes	5-10 minutes	No	Jog or run, Stretches and joint mobility		I use time for other things	During the initial warm-up, At the end of the game
2021-09-04 17:03:08	Yes	59	Men	183	85	Tenerife	Local, Regional, National	Total 39 years	2020-2021	Senior category, Youth categories	Between 5 and 6 games/week	FCB Group 2 and FIBT	Yes	No	To maintain or develop aerobic resistance (swimming, cycling, career, jumping, etc.)	More than 60 minutes	2-3 days	Yes	10-15 minutes	Yes	Strength exercise (jumps, push-ups, etc.), Stretches and joint mobility	To try to maintain the same physical level and not losing temperature		During the initial warm-up, During the break between halves
2021-09-04 17:05:50	Yes	32	Men	184	130	Logroño, La Rioja	Local, Regional	Local 6 years. Regional 1 year	2020-2021	Senior category, Youth categories	Between 1 and 2 games/week	The lowest	Yes	No	To maintain or develop aerobic resistance (swimming, cycling, career, jumping, etc.), to maintain or develop muscle strength (different muscle strengthening techniques with machines, with free weight, with body weight itself, with elastic gums, etc.), to maintain or develop other capacities (coordination, balance, agility)	More than 60 minutes	2-3 days	Yes	10-15 minutes	No			In 10 minutes if you sit you can feel a little off, I try to keep moving.	At the end of the game		Thank you
2021-09-04 17:06:37	Yes	53	Men	178	76	Las Palmas de GC. Gran Canaria.	National	Local 25 years, Regional 20, National 10 International without experience	2019-2020	Senior category, Youth categories	Between 6 and 7 games/week	Benjamin, Mini, Preinf., Inf, Precadete, Cadet, Junior, Senior (Insular Level) CAD and Junior (Fed. Canarian Autonomic Level)	Yes	No	To maintain or develop muscle strength (different muscle strengthening techniques with machines, with free weight, with body weight itself, with elastic rubber, etc.)	More than 60 minutes	2-3 days	Yes	5-10 minutes	Yes	Stretches and joint mobility	Well, with 51 years that I have, I stretch between quarters to prevent my legs from overload and at break too.		During the initial warm-up, At the break between the first and second quarters, During the break between halves, At the break between the third and last quarter, At the end of the game		The years are approximate, I've been officiating for a long time and I don't remember exactly. All the best.
2021-09-04 17:12:13	Yes	28	Women	165	77	logroño, La Rioja	Local, Regional	4 years Local, 4 regional	2018-2019	Senior category, Youth categories	Between 5 and 6 games/week	Senior	Yes	No	To maintain or develop aerobic resistance (swimming, cycling, career, jumping, etc.)	Between 45 and 60 minutes	4-5 days	No		No				At the end of the game
2021-09-04 17:12:19	Yes	23	Men	185	90	San Cristóbal de La Laguna	Local	1 year	2019-2020	Youth categories	Between 2 and 3 games/week	-	Yes	No	To maintain or develop aerobic resistance (swimming, cycling, career, jumping, etc.), to maintain or develop muscle strength (different muscle strengthening techniques with machines, with free weight, with body weight itself, with elastic rubber, etc.)	More than 60 minutes	4-5 days	Yes	10 minutes	No			I feel good to continue	During the initial warm-up, At the end of the game
2021-09-04 17:13:27	Yes	41	Women	159	56	Galdar	Local, Regional	7 Local 5 regional	2019-2020	Senior category, Youth categories	Between 2 and 3 games/week	Regional down	Yes	No	To maintain or develop muscle strength (different muscle strengthening techniques with machines, with free weight, with body weight itself, with elastic rubber, etc.)	Between 45 and 60 minutes	2-3 days	Yes	5 minutes	No			Well, perhaps due to laziness	During the initial warm-up
2021-09-04 17:13:48	Yes	28	Women	163	67	Las Palmas de Gran Canaria	Regional	Regional (5 years)	2018-2019	Senior category	7 or more games/week	From Benjamines to Senior	Yes	Yes	To maintain or develop aerobic resistance (swimming, cycling, career, jumping, etc.), to maintain or develop muscle strength (different muscle strengthening techniques with machines, with free weight, with body weight itself, with elastic gums, etc.), to maintain or develop speed (ability to perform sprints in the shortest possible time and repeat them the largest number of times)	More than 60 minutes	4-5 days	No		No			It is not usually necessary	During the initial warm-up, During the break between halves	Laziness
2021-09-04 17:13:59	Yes	19	Men	185	70	Las Palmas de Gran Canaria	Regional	Local (4 years), regional (1 year), National and International (without experience)	2018-2019	Youth categories	Between 3 and 4 games/week	Insular	Yes	Yes	To maintain or develop aerobic resistance (swimming, cycling, career, jumping, etc.), to maintain or develop muscle strength (different muscle strengthening techniques with machines, with free weight, with body weight itself, with elastic gums, etc.), to maintain or develop speed (ability to perform sprints in the shortest possible time and repeat them the largest number of times)	More than 60 minutes	6-7 days	No		No			It is not a routine, I simply perform some warm-up movements	Never
2021-09-04 17:14:09	Yes	28	Men	190	86.5	San Cristóbal de La Laguna, Santa Cruz de Tenerife	Local, Regional	Local (4 years), Regional (3 years)	2019-2020	Senior category, Youth categories	7 or more games/week	Group 2 of the FCB, 1st female autonomics, local seniors categories and base categories of the province	Yes	No	To maintain or develop aerobic resistance (swimming, cycling, career, jumping, etc.), to maintain or develop muscle strength (different muscle strengthening techniques with machines, with free weight, with body weight itself, with elastic gums, etc.), to maintain or develop other capacities (coordination, balance, agility)	Between 45 and 60 minutes	4-5 days	Yes	3-5 minutes	Yes	Stretches and joint mobility, Breath management techniques (activation/relaxation, awareness)	Not to lose the level of activation achieved during the game		During the initial warm-up, During the break between halves		More than important and necessary aspect on which to work to maintain a good physical condition for the season and avoid possible injuries.
2021-09-04 17:19:48	Yes	27	Men	184	80	La Orotava	Local	2 years	2020-2021	Youth categories	Between 3 and 4 games/week	FIBT	No					No		No				Never
2021-09-04 17:25:17	Yes	37	Men	173	74	Tenerife	Regional	Regional 2 years	2019-2020	Youth categories	7 or more games/week	FIBT	Yes	No	To maintain or develop aerobic resistance (swimming, cycling, career, jumping, etc.), to maintain or develop muscle strength (different muscle strengthening techniques with machines, with free weight, with body weight itself, with elastic gums, etc.), to maintain or develop speed (ability to perform sprints in the shortest possible time and repeat them the largest number of times), to maintain or…	More than 60 minutes	6-7 days	Yes	5 minutes	Yes	Stretches and joint mobility	Return to 100%		During the initial warm-up
2021-09-04 17:27:47	Yes	26	Women	170	60	Las Palmas	Local, Regional	Local (7years), Regional (4 years)	2020-2021	Senior category	Between 4 and 5 games/week	2nd NAC	Yes	No	To maintain or develop aerobic resistance (swimming, cycling, career, jumping, etc.), to maintain or develop muscle strength (different muscle strengthening techniques with machines, with free weight, with body weight itself, with elastic gums, etc.), to maintain or develop flexibility (either with the body itself, help from another person, or with elements such as towels, elastic gums, foam roll…	Between 45 and 60 minutes	4-5 days	Yes		No			Time	At the end of the game
2021-09-04 17:29:33	Yes	43	Men	172	70	Los Llanos de Aridane	Local, Regional	Local 20, Regional 15	2018-2019	Senior category, Youth categories	Between 3 and 4 games/week	Autonomic junior and autonomic cadet	Yes	No	To maintain or develop aerobic resistance (swimming, cycling, career, jumping, etc.)	Between 45 and 60 minutes	2-3 days	Yes	10 minutes between stretching and warm-up (jogging, sprint ...)	Yes	Stretches and joint mobility	To avoid returning after the break with less temperature and avoiding possible injury		During the initial warm-up, During the break between halves, At the end of the game
2021-09-04 17:31:43	Yes	53	Men	194	100	Vitoria-Gateiz	National	23 y	2018-2019	Senior category	Between 1 and 2 games/week	FEB	Yes	Yes	To maintain or develop aerobic resistance (swimming, cycling, career, jumping, etc.), to maintain or develop muscle strength (different muscle strengthening techniques with machines, with free weight, with body weight itself, with elastic gums, etc.), to maintain or develop speed (ability to perform sprints in the shortest possible time and repeat them the largest number of times), to maintain or…	More than 60 minutes	4-5 days	Yes	20 minutes	Yes	Stretches and joint mobility, Coordination and balance exercises, Breath management techniques (activation/relaxation, awareness)	Concentration routine		During the initial warm-up, During the break between halves, At the end of the game		A pleasure to collaborate for the study and help future referees
2021-09-04 17:32:29	Yes	27	Men	183	75	Santa Cruz de Tenerife	Local, Regional	Local 1 year Regional (5)	2020-2021	Senior category	Between 5 and 6 games/week	First male and female first division, autonomic junior	Yes	No	To maintain or develop muscle strength (different muscle strengthening techniques with machines, with free weight, with body weight itself, with elastic rubber, etc.), to maintain or develop speed (ability to perform sprints in the shortest possible time possible and repeat them the greatest number of times)	More than 60 minutes	4-5 days	Yes	5 minutes	No			I had not considered it necessary	During the initial warm-up, At the end of the game
2021-09-04 17:41:59	Yes	28	Men	187	97	Santa Cruz de Tenerife	Local, Regional	Local: 8 Regional: 5	2018-2019	Senior category	7 or more games/week	Autonomic Group	Yes	No	To maintain or develop aerobic resistance (swimming, cycling, career, jumping, etc.), to maintain or develop muscle strength (different muscle strengthening techniques with machines, with free weight, with body weight itself, with elastic gums, etc.), to maintain or develop speed (ability to perform sprints in the shortest possible time and repeat them the largest number of times)	More than 60 minutes	6-7 days	Yes	10 minutes	Yes	Stretches and joint mobility	Not to return to the court losing temperature		During the initial warm-up, During the break between halves
2021-09-04 17:42:45	Yes	27	Men	177	72	La Orotava, Tenerife	Local, Regional	Local (7 years), Regional (5 years), National (without experience), International (without experience)	2018-2019	Senior category, Youth categories	Between 6 and 7 games/week	Group 1 FCB	Yes	Yes	To maintain or develop aerobic resistance (swimming, cycling, career, jumping, etc.), to maintain or develop muscle strength (different muscle strengthening techniques with machines, with free weight, with body weight itself, with elastic gums, etc.), to maintain or develop speed (ability to perform sprints in the shortest possible time and repeat them the largest number of times)	More than 60 minutes	6-7 days	Yes	20 minutes	No			For muscles recovery	During the initial warm-up
2021-09-04 17:45:56	Yes	47	Men	183	88	Las Palmas de GC	Local, Regional	Local 20 years y Regional 12	2019-2020	Senior category, Youth categories	Between 2 and 3 games/week	1 Autonomous Division	No	No	To maintain or develop aerobic resistance (swimming, cycling, career, jumping, etc.)	Between 15 and 30 minutes	1 day	Yes	20 minutes	Yes	Stretches and joint mobility	Keep active muscles and joints		During the initial warm-up, During the break between halves, At the end of the game		Thank you so much. The issue of the warm-up before and after the games is something that has been lost, at least in my committee, and it seems to me vital. Greetings.
2021-09-04 17:46:25	Yes	35	Men	183	79	La Rioja	Local, Regional	3 y	2020-2021	Senior category, Youth categories	Between 1 and 2 games/week	Junior Senior 2 Division	Yes	No	To maintain or develop the speed (ability to perform sprints in the shortest possible time and repeat them the greatest number of times), to maintain or develop flexibility (either with the body, help from another person, or with elements such as towels , elastic gums, foam roller, etc.), to maintain or develop other capacities (coordination, balance, agility)	Less than 15 minutes	2-3 days	Yes	8 minutes	No	Jog or run, Running at maximum speed (sprinting), Strength exercise (jumps, push-ups, etc.), Stretches and joint mobility			During the initial warm-up
2021-09-04 17:47:48	Yes	25	Women	170	73	Las Palmas de Gran Canaria	Local, Regional	Local (2years), Regional (1 year), National (without experience), International (without experience)	2019-2020	Youth categories	7 or more games/week	2019/2020 Local category	Yes	No	To maintain or develop aerobic resistance (swimming, cycling, career, jumping, etc.), to maintain or develop muscle strength (different muscle strengthening techniques with machines, with free weight, with body weight itself, with elastic rubber, etc.)	Between 45 and 60 minutes	4-5 days	Yes	2-3 minutes	No	Jog or run, Running at maximum speed (sprinting), Stretches and joint mobility		Lack of habit	During the initial warm-up, At the end of the game
2021-09-04 18:24:31	Yes	55	Men	180	85	Logroño	National	6 years	2018-2019	Senior category	Between 2 and 3 games/week	Second National Division	Yes	No	To maintain or develop aerobic resistance (swimming, cycling, career, jumping, etc.)	More than 60 minutes	4-5 days	Yes	20 minutes	No			Because I prefer to rest	During the initial warm-up
2021-09-04 18:55:15	Yes	54	Men	177	90	Lasarte-oria guipuzcoa	Local, Regional, National	36 years	2019-2020	Senior category	Between 6 and 7 games/week	1 div.autonomica senior juni9r cadet children mini	Yes	No	To maintain or develop aerobic resistance (swimming, cycling, career, jumping, etc.)	More than 60 minutes	2-3 days	Yes	15 minutes	No			I don't think I need it	During the initial warm-up
2021-09-04 19:13:39	Yes	29	Women	167	74	Tenerife	Local, Regional	Local 4 years, Regional 3 years	2019-2020	Senior category, Youth categories	Between 5 and 6 games/week	Autonomic, Group 2 FCB	Yes	Yes	To maintain or develop aerobic resistance (swimming, cycling, career, jumping, etc.), to maintain or develop muscle strength (different muscle strengthening techniques with machines, with free weight, with body weight itself, with elastic gums, etc.), to maintain or develop speed (ability to perform sprints in the shortest possible time and repeat them the largest number of times), to maintain or…	More than 60 minutes	4-5 days	No		Yes	Stretches and joint mobility		Rest, little time between halves, I have not lost temperature	During the initial warm-up
2021-09-04 19:15:58	Yes	54	Men	187	95	Pamplona	National	Local (1) Regional (10) National (2)	2020-2021	Senior category	Between 3 and 4 games/week	Group 3	Yes	No	To maintain or develop muscle strength (different muscle strengthening techniques with machines, with free weight, with body weight itself, with elastic rubber, etc.)	Between 30 and 45 minutes	2-3 days	Yes	10 minutes	No			I do not usually need to reactivate	During the initial warm-up
2021-09-04 19:27:28	Yes	30	Men	173	74	La Rioja	National	National 14 years	2018-2019	Senior category	Between 4 and 5 games/week	Group 3	Yes	No	To maintain or develop aerobic resistance (swimming, cycling, career, jumping, etc.), to maintain or develop muscle strength (different muscle strengthening techniques with machines, with free weight, with body weight itself, with elastic gums, etc.), to maintain or develop speed (ability to perform sprints in the shortest possible time and repeat them the largest number of times), to maintain or…	Between 30 and 45 minutes	2-3 days	Yes	10-15 minutes	No				During the initial warm-up
2021-09-04 20:26:40	Yes	25	Men	184	83	Las palmas de Gran Canaria	Regional	Regional (2 years), Regional (3 years), International (without experience)	2020-2021	Senior category	Between 5 and 6 games/week	2020/2021 First National	Yes	No	To maintain or develop aerobic resistance (swimming, cycling, career, jumping, etc.), to maintain or develop muscle strength (different muscle strengthening techniques with machines, with free weight, with body weight itself, with elastic rubber, etc.)	More than 60 minutes	4-5 days	Yes	3 minutes	Yes	Strength exercise (jumps, push-ups, etc.), Stretches and joint mobility		Simply because I lost temperature and I need to warm-up again.	During the initial warm-up, At the end of the game
2021-09-04 20:38:08	Yes	23	Men	180	75	las palmas	Regional	1 year Local 1 Regional	2020-2021	Youth categories	7 or more games/week	Junior and Cadet Autonomic, local from Benjamin to Sub22	Yes	No	To maintain or develop aerobic resistance (swimming, cycling, career, jumping, etc.), to maintain or develop muscle strength (different muscle strengthening techniques with machines, with free weight, with body weight itself, with elastic gums, etc.), to maintain or develop speed (ability to perform sprints in the shortest possible time and repeat them the largest number of times), to maintain or…	More than 60 minutes	6-7 days	Yes	15 minutes	Yes	Stretches and joint mobility	To resume the game with a favorable body temperature		During the initial warm-up, During the break between halves, At the end of the game
2021-09-04 20:45:41	Yes	60	Men	183	78	Puerto del Rosario	Regional	37 y	2019-2020	Senior category, Youth categories	Between 3 and 4 games/week	Senior and automatic	Yes	No	To maintain or develop other capacities (coordination, balance, agility)	More than 60 minutes	2-3 days	Yes	15 minutes	Yes	Stretches and joint mobility	So that the body does not cool		During the initial warm-up, During the break between halves
2021-09-04 20:53:11	Yes	25	Men	195	83	Santa Cruz de Tenerife	Regional	Local (5 years), Regional (3 years)	2020-2021	Senior category, Youth categories	Between 5 and 6 games/week	FCB Group 2	Yes	No	To maintain or develop aerobic resistance (swimming, cycling, career, jumping, etc.), to maintain or develop muscle strength (different muscle strengthening techniques with machines, with free weight, with body weight itself, with elastic rubber, etc.)	More than 60 minutes	6-7 days	Yes	5 minutes	No	Jog or run, Stretches and joint mobility			During the initial warm-up, At the end of the game
2021-09-04 20:55:38	Yes	23	Men	183	83	Puerto de la Cruz	Local, Regional	1 year	2020-2021	Youth categories	1 game/week	FIBT	Yes	No	To maintain or develop aerobic resistance (swimming, cycling, career, jumping, etc.), to maintain or develop muscle strength (different muscle strengthening techniques with machines, with free weight, with body weight itself, with elastic rubber, etc.)	More than 60 minutes	6-7 days	No		Yes	Stretches and joint mobility	Avoid muscle injuries		During the initial warm-up, During the break between halves
2021-09-04 21:05:08	Yes	36	Men	177	99	Castillo del romeral	Local, Regional	Local(17) regional (5)	2005-2006	Senior category, Youth categories	Between 5 and 6 games/week	Group 2	Yes	No	To maintain or develop speed (ability to perform sprints in the shortest possible time and repeat them the largest number of times)	Between 15 and 30 minutes	2-3 days	No		Yes	Stretches and joint mobility	Do not atrophy musculature		During the break between halves		The questionnaire is fine
2021-09-04 21:10:28	Yes	26	Men	185	94	Tenerife , Santiago del Teide	Local, Regional	Local 2 Regional 1	2018-2019	Senior category, Youth categories	7 or more games/week	FCB Group 3	Yes	Yes	To maintain or develop aerobic resistance (swimming, cycling, career, jumping, etc.), to maintain or develop muscle strength (different muscle strengthening techniques with machines, with free weight, with body weight itself, with elastic rubber, etc.)	More than 60 minutes	4-5 days	Yes	10 minutes	Yes	Stretches and joint mobility, Breath management techniques (activation/relaxation, awareness)	Concentration		During the initial warm-up, During the break between halves
2021-09-04 21:45:28	Yes	57	Men	173	64	Santa Lucía	Regional	Local 9 Regional 4	2018-2019	Senior category, Youth categories	7 or more games/week	Not and arbitrated for Feb	Yes	No	To maintain or develop aerobic resistance (swimming, cycling, career, jumping, etc.)	Between 45 and 60 minutes	2-3 days	Yes	4 minutes	No				During the initial warm-up, At the end of the game	To avoid injuries and take rythm for starting the game well
2021-09-04 21:55:16	Yes	26	Men	183	73	Las palmas	Regional	Regional (11 years)	2019-2020	Senior category	Between 5 and 6 games/week	Group 2	Yes	No				Yes	(20 minutes)	No	Jog or run, Running at maximum speed (sprinting), Stretches and joint mobility, Other			During the initial warm-up, During the break between halves
2021-09-04 23:26:13	Yes	46	Women	170	67	Santa Cruz de Tenerife	Local, Regional	Local (30 years) Regional 20( years)	2018-2019	Senior category, Youth categories	Between 6 and 7 games/week	Autonomics	Yes	No	To maintain or develop the speed (ability to perform sprints in the shortest possible time and repeat them the greatest number of times), to maintain or develop flexibility (either with the body, help from another person, or with elements such as towels , elastic gums, foam roller, etc.), to maintain or develop other capacities (coordination, balance, agility)	Between 30 and 45 minutes	2-3 days	Yes	10 minutes	Yes	Breath management techniques (activation/relaxation, awareness)	Not to start cold		During the initial warm-up, At the end of the game
2021-09-05 00:02:53	Yes	22	Men	188	74	Bilbao, bizkaia	Local	Local (3 years)	2018-2019	Senior category	Between 3 and 4 games/week	Group 6	Yes	No	To maintain or develop aerobic resistance (swimming, cycling, career, jumped to the commons, etc.), to maintain or develop speed (ability to perform sprints in the shortest possible time and repeat them the greatest number of times), for maintain or develop other capacities (coordination, balance, agility)	More than 60 minutes	4-5 days	Yes	10-15 minutes	No			Because I don't need it.	During the initial warm-up
2021-09-05 13:36:35	Yes	22	Women	158	56	Corralejo	Local	2years	2017-2018	Youth categories	1 game/week	Group 2	Yes	No	To maintain or develop aerobic resistance (swimming, cycling, career, jumping, etc.)	Between 30 and 45 minutes	2-3 days	No		Yes	Stretches and joint mobility			At the end of the game
2021-09-05 14:02:41	Yes	23	Men	181	72	Puerto del rosario	Local, Regional	Local (4 years) Regional (1 year)	2019-2020	Youth categories	Between 2 and 3 games/week	Group 2	Yes	No	To maintain or develop aerobic resistance (swimming, cycling, career, jumping, etc.), to maintain or develop muscle strength (different muscle strengthening techniques with machines, with free weight, with body weight itself, with elastic rubber, etc.)	More than 60 minutes	4-5 days	Yes	5 minutes approx.	Yes	Jog or run, Stretches and joint mobility	To prevent injuries		At the end of the game
2021-09-06 16:04:37	Yes	20	Men	183	90	La Orotava, Sants Cruz de Tenerife	Local	Local (2 years)	2019-2020	Youth categories	Between 2 and 3 games/week	Minibasket, Infantil, Cadet and Junior	Yes	No	To maintain or develop muscle strength (different muscle strengthening techniques with machines, with free weight, with body weight itself, with elastic rubber, etc.)	More than 60 minutes	4-5 days	No		No			Coordination with the team.	At the end of the game
2021-09-06 21:23:14	Yes	55	Women	171	78	Santa Cruz de Tenerife	Regional	Local 20 years regional / Regional 2 years National without experience International without experience	2018-2019	Senior category, Youth categories	Between 4 and 5 games/week	Local	Yes	No	To maintain or develop aerobic resistance (swimming, cycling, career, jumped to the commits, etc.), to maintain or develop speed (ability to perform sprints in the shortest possible time and repeat them the largest number of times)	Between 45 and 60 minutes	2-3 days	Yes	5-10 minutes	No			There are few places where it can be done. If you have several games you prefer to save energy	During the initial warm-up, At the end of the game		A protocol of stretching exercises and exercises for the break of the game would be fine to put them into practice
2021-09-10 12:03:35	Yes	33	Women	169	57	Sevilla	National	Local (9 years), Regional (7 years), National (6years), International (without experencia)	2018-2019	Senior category	Between 2 and 3 games/week	FEB Group 2	Yes	No	To maintain or develop muscle strength (different muscle strengthening techniques with machines, with free weight, with body weight itself, with elastic rubber, etc.)	Between 30 and 45 minutes	2-3 days	No		No			So far I have not felt that I will need it	During the initial warm-up, At the end of the game
2021-09-10 12:27:06	Yes	25	Men	175	76	Sevilla	Local, Regional	Local 7 years Regional 3 years	2020-2021	Senior category, Youth categories	Between 1 and 2 games/week	National 1 and Provincial	Yes	No	To maintain or develop aerobic resistance (swimming, cycling, career, jumping, etc.), to maintain or develop muscle strength (different muscle strengthening techniques with machines, with free weight, with body weight itself, with elastic gums, etc.), to maintain or develop other capacities (coordination, balance, agility)	More than 60 minutes	4-5 days	Yes	5-7 minutes	No			I have not needed it so far to maintain concentration.	During the initial warm-up, At the end of the game
2021-09-10 12:29:21	Yes	27	Men	171	69	Prado del Rey, Cádiz	Local	Local (4 years)	2018-2019	Senior category, Youth categories	Between 5 and 6 games/week	Provincial Fab Sevilla	Yes	No	To maintain or develop aerobic resistance (swimming, cycling, career, jumping, etc.), to maintain or develop muscle strength (different muscle strengthening techniques with machines, with free weight, with body weight itself, with elastic gums, etc.), to maintain or develop other capacities (coordination, balance, agility)	More than 60 minutes	4-5 days	Yes	5 minutes	No			Habits	During the initial warm-up
2021-09-10 12:32:49	Yes	39	Men	174	88	Albaida del Aljarafe (Sevilla)	Regional	Local (18 years), Regional (13 years) National (without experience) International (without experience)	2018-2019	Senior category	Between 1 and 2 games/week	Autonomics	Yes	No	To maintain or develop aerobic resistance (swimming, cycling, career, jumped to the commits, etc.), to maintain or develop speed (ability to perform sprints in the shortest possible time and repeat them the largest number of times)	Between 45 and 60 minutes	2-3 days	Yes	5-10 minutes	No			Lack of time, laziness etc ..	During the break between halves, At the end of the game
2021-09-10 12:39:18	Yes	29	Men	178	79	Pilas (Sevilla)	National	Local (4 years), National (4 years)	2020-2021	Senior category	Between 3 and 4 games/week	1 National	Yes	No	To maintain or develop muscle strength (different muscle strengthening techniques with machines, with free weight, with body weight itself, with elastic rubber, etc.), to maintain or develop flexibility (either with the body itself, help from Another person, or with elements such as towels, elastic tires, foam roller, etc.)	More than 60 minutes	4-5 days	Yes	15 minutes	No			Don't have	During the initial warm-up, At the end of the game
2021-09-10 12:41:23	Yes	30	Men	183	74	Sevilla	Local, Regional	Local (11 years), Regional (4) total seasons 11	2018-2019	Senior category, Youth categories	Between 2 and 3 games/week	Provincial or local and autonomous	Yes	No	To maintain or develop aerobic resistance (swimming, cycling, career, jumping, etc.), to maintain or develop muscle strength (different muscle strengthening techniques with machines, with free weight, with body weight itself, with elastic rubber, etc.)	More than 60 minutes	6-7 days	Yes	20 minutes	No			When I find myself better physically for the demands of the game, I have not considered these exercises.	During the initial warm-up, At the end of the game
2021-09-10 12:47:06	Yes	25	Men	175	58	Sevilla	Local, Regional	Local (7 years), regional (2 games)	2019-2020	Senior category, Youth categories	Between 4 and 5 games/week	Provincial and 1st National	Yes	No	To maintain or develop aerobic resistance (swimming, cycling, career, jumping, etc.)	Between 15 and 30 minutes	2-3 days	No	20-40 minutes	No	Jog or run			During the initial warm-up
2021-09-10 13:14:52	Yes	52	Men	176	71	Mairena del aljarafe Sevilla	Local, Regional, National	Local 23years, Regional 12 years, National 5 years	2018-2019	Senior category, Youth categories	Between 1 and 2 games/week	Provincial	Yes	No	To maintain or develop aerobic resistance (swimming, cycling, career, jumping, etc.), to maintain or develop muscle strength (different muscle strengthening techniques with machines, with free weight, with body weight itself, with elastic rubber, etc.)	More than 60 minutes	2-3 days	Yes	3-5 minutes	Yes	Stretches and joint mobility	To alleviate possible injuries and activate concentration		During the initial warm-up, During the break between halves, At the end of the game		Thank the initiative and offer my experience without severe injuries and years of officiating maintaining an acceptable physical condition
2021-09-10 13:19:23	Yes	33	Men	190	85	Almeria	National	Local 6 years regional 2 National 2	2020-2021	Senior category	Between 1 and 2 games/week	Group 2	Yes	No	To maintain or develop aerobic resistance (swimming, cycling, career, jumping, etc.), to maintain or develop muscle strength (different muscle strengthening techniques with machines, with free weight, with body weight itself, with elastic gums, etc.), to maintain or develop speed (ability to perform sprints in the shortest possible time and repeat them the largest number of times), to maintain or…	More than 60 minutes	4-5 days	Yes	5-10 minutes	No	Jog or run, Running at maximum speed (sprinting), Strength exercise (jumps, push-ups, etc.), Stretches and joint mobility		Laziness, lack of time	At the end of the game
2021-09-10 13:31:32	Yes	38	Men	177	80	Madrid	Local, Regional	Local (18), Regional (14)	2018-2019	Senior category, Youth categories	Between 4 and 5 games/week	1st Autonomic / 2nd Autonomics / Provincial	Yes	No	To maintain or develop muscle strength (different muscle strengthening techniques with machines, with free weight, with body weight itself, with elastic rubber, etc.)	Between 45 and 60 minutes	1 day	Yes	10 minutes	No			Lack of time between rest / coordination with the table	During the initial warm-up, At the end of the game
2021-09-10 13:39:57	Yes	31	Men	180	80	Sevilla	Local, National	Local 10 and 2 National	2018-2019	Senior category, Youth categories	Between 4 and 5 games/week	Provincial and national	Yes	Yes	To maintain or develop aerobic resistance (swimming, cycling, career, jumping, etc.), to maintain or develop muscle strength (different muscle strengthening techniques with machines, with free weight, with body weight itself, with elastic gums, etc.), to maintain or develop speed (ability to perform sprints in the shortest possible time and repeat them the largest number of times), to maintain or…	More than 60 minutes	6-7 days	Yes	10 minutes	No	Jog or run, Running at maximum speed (sprinting), Stretches and joint mobility, Breath management techniques (activation/relaxation, awareness)		Because you need to be activated since you enter through the sports center	During the initial warm-up, During the break between halves, At the end of the game
2021-09-10 16:24:26	Yes	23	Men	190	86	Sevilla	Local	Local (21 years)	2020-2021	Senior category, Youth categories	Between 5 and 6 games/week	Provincial Sevilla	Yes	No	To maintain or develop aerobic resistance (swimming, cycling, career, jumping, etc.), to maintain or develop muscle strength (different muscle strengthening techniques with machines, with free weight, with body weight itself, with elastic gums, etc.), to maintain or develop other capacities (coordination, balance, agility)	More than 60 minutes	4-5 days	No		Yes	Stretches and joint mobility, Breath management techniques (activation/relaxation, awareness)	Do not lose connection with the game and keep the line of work		During the initial warm-up, During the break between halves, At the end of the game
2021-09-10 16:28:33	Yes	27	Men	178	88	Sevilla	Regional	Local 3 years, Regional 1 year	2018-2019	Senior category, Youth categories	Between 3 and 4 games/week	Local and automomic	Yes	No	To maintain or develop other capacities (coordination, balance, agility)	More than 60 minutes	2-3 days	Yes	10-15 minutes	No			I consider that I have enough tension to start the second part, and I do not need to overload.	During the initial warm-up		It seems to me a good way to know what kind of protocols we use before, during and after finishing the game, I consider it constructive.
2021-09-11 15:23:31	Yes	25	Men	191	85	Pamplona, Navarra	Local, Regional, National	Local (6 years), Regional (2 years), National (2 years)	2020-2021	Senior category	Between 3 and 4 games/week	G4	Yes	No	To maintain or develop aerobic resistance (swimming, cycling, career, jumping, etc.), to maintain or develop muscle strength (different muscle strengthening techniques with machines, with free weight, with body weight itself, with elastic gums, etc.), to maintain or develop other capacities (coordination, balance, agility)	Between 45 and 60 minutes	4-5 days	Yes	8 minutes	No			Time is only allocated to rest.	During the initial warm-up, At the end of the game
2021-09-11 15:28:11	Yes	35	Men	188	78	PAMPLONA, NAVARRA	Local, Regional, National	Local (5 years) Regional (3 years) National (3 years)	2020-2021	Senior category, Youth categories	Between 4 and 5 games/week	FEB Group 3 (EBA and LF2) 1 Division, 2 Division, Autonomic Senior, Autonomic Junior, Cadet, Children, Preinfantil, Mini, Premini	Yes	No	To maintain or develop aerobic resistance (swimming, cycling, career, jumping, etc.)	Between 30 and 45 minutes	2-3 days	Yes	5-10 minutes	No			At most I can stretch a little, and hit my legs to heat them, but I do not do the same as in the pre-match warm-up	During the initial warm-up, During the break between halves, At the end of the game	Promote muscle recovery, avoid injuries, muscle cramps, joint pain
2021-09-11 15:58:00	Yes	27	Men	181	82	Pamplona, Navarra	Local, Regional	Local 3 years, Regional 1	2020-2021	Youth categories	Between 3 and 4 games/week	Navarra School of Referees (Junior 2nd Division)	Yes	No	To maintain or develop aerobic resistance (swimming, cycling, career, jumping, etc.), to maintain or develop muscle strength (different muscle strengthening techniques with machines, with free weight, with body weight itself, with elastic rubber, etc.)	More than 60 minutes	4-5 days	Yes	3-5 minutes	No			There is not too much time left for it	During the initial warm-up, At the end of the game
2021-09-11 17:24:58	Yes	35	Men	186	79	Sevilla	Local, Regional, National	Local (6 years). Regional (5 years). National (5 years)	2019-2020	Senior category, Youth categories	1 game/week	Group 1	Yes	No	To maintain or develop aerobic resistance (swimming, cycling, career, jumping, etc.), to maintain or develop muscle strength (different muscle strengthening techniques with machines, with free weight, with body weight itself, with elastic rubber, etc.)	Between 45 and 60 minutes	2-3 days	No		No				During the initial warm-up
2021-09-11 17:48:02	Yes	28	Men	183	76	Alcalá de Guadaíra, Sevilla	Local, Regional, National	Regional (5 years) National (1year)	2020-2021	Senior category, Youth categories	Between 4 and 5 games/week	National	Yes	No	To maintain or develop aerobic resistance (swimming, cycling, career, jumping, etc.), to maintain or develop muscle strength (different muscle strengthening techniques with machines, with free weight, with body weight itself, with elastic rubber, etc.)	More than 60 minutes	4-5 days	Yes	5-6 minutes	Yes	Breath management techniques (activation/relaxation, awareness)	To try to keep the pre-break game mental level	Lack of time	During the initial warm-up
2021-09-12 12:38:07	Yes	28	Men	184	85	Pamplona	Regional	Regional 8	2018-2019	Senior category	Between 4 and 5 games/week	Group 4	Yes	No	To maintain or develop muscle strength (different muscle strengthening techniques with machines, with free weight, with body weight itself, with elastic rubber, etc.)	More than 60 minutes	4-5 days	Yes	First running to warm-up and raise the heart rate a little and then mobility exercises and some stretching	No			Because during the break I did not cool completely and in a couple of plays I will be warm again	At the end of the game
2021-09-12 13:50:30	Yes	38	Men	183	72	Madrid	Local, Regional, National	Local 17 National 3	2018-2019	Senior category, Youth categories	Between 4 and 5 games/week	National	Yes	No	To maintain or develop aerobic resistance (swimming, cycling, career, jumping, etc.), to maintain or develop muscle strength (different muscle strengthening techniques with machines, with free weight, with body weight itself, with elastic gums, etc.), to maintain or develop speed (ability to perform sprints in the shortest possible time and repeat them the largest number of times)	Between 30 and 45 minutes	4-5 days	Yes	5 minutes	No			At the moment, I do not see it necessary.	During the initial warm-up, At the end of the game
2021-09-12 13:56:19	Yes	29	Men	184	80	Madrid	Local, Regional	3 Local, 4 Regional	2018-2019	Senior category	Between 4 and 5 games/week	1st autonomic	Yes	Yes	To maintain or develop aerobic resistance (swimming, cycling, career, jumping, etc.), to maintain or develop muscle strength (different muscle strengthening techniques with machines, with free weight, with body weight itself, with elastic gums, etc.), to maintain or develop speed (ability to perform sprints in the shortest possible time and repeat them the largest number of times)	Between 45 and 60 minutes	4-5 days	Yes	10-15 minutes	No			Lack of time	During the initial warm-up		Luck
2021-09-12 13:59:25	Yes	25	Men	167	61	Torrejón de Ardoz	Local, Regional	Local (7 years), Regional (6 years)	2018-2019	Senior category	Between 5 and 6 games/week	First autonomic. Second Autonomic. And training categories from Benjamin to Sub-21	Yes	No	To maintain or develop muscle strength (different muscle strengthening techniques with machines, with free weight, with body weight itself, with elastic rubber, etc.)	Between 45 and 60 minutes	2-3 days	Yes	5-10 minutes	No			I don't have the routine to do it	During the initial warm-up
2021-09-12 14:04:39	Yes	27	Women	169	61	Madrid	Regional	Regional (6 years )	2019-2020	Senior category	Between 2 and 3 games/week	First National Madrid	Yes	No	To maintain or develop aerobic resistance (swimming, cycling, career, jumping, etc.), to maintain or develop muscle strength (different muscle strengthening techniques with machines, with free weight, with body weight itself, with elastic rubber, etc.)	Between 45 and 60 minutes	4-5 days	Yes	5-10 minutes	No				During the initial warm-up
2021-09-12 14:07:00	Yes	26	Men	184	87	Madrid	Regional	6 years Regional	2020-2021	Senior category, Youth categories	Between 4 and 5 games/week	1st Autonomic	Yes	No	To maintain or develop aerobic resistance (swimming, cycling, career, jumping, etc.), to maintain or develop muscle strength (different muscle strengthening techniques with machines, with free weight, with body weight itself, with elastic rubber, etc.)	More than 60 minutes	4-5 days	No		No			I had never stopped to think that it was necessary. I have always considered the break as a moment of rest.	During the initial warm-up
2021-09-12 14:11:29	Yes	24	Men	192	83	Mostoles (Madrid)	Regional	Local (without experience), Regional (6 years), National (one tournament), International (without experience)	2019-2020	Senior category	Between 2 and 3 games/week	National and lower	Yes	No	To maintain or develop aerobic resistance (swimming, cycling, career, jumping, etc.), to maintain or develop flexibility (either with the body, help from another person, or with elements such as towels, elastic rubbers , Foam Roller, etc.), to maintain or develop other capacities (coordination, balance, agility)	Between 45 and 60 minutes	4-5 days	Yes	3-5 minutes	No			I do not consider that the body gets cooled in order to need it	During the initial warm-up, At the end of the game
2021-09-12 14:19:18	Yes	43	Men	180	83	Madrid	National	10 National	2019-2020	Senior category	Between 4 and 5 games/week	National	Yes	No	To maintain or develop aerobic resistance (swimming, cycling, career, jumping, etc.), to maintain or develop muscle strength (different muscle strengthening techniques with machines, with free weight, with body weight itself, with elastic rubber, etc.)	Between 45 and 60 minutes	6-7 days	Yes	15 minutes	Yes	Stretches and joint mobility		Heel calcifications	During the break between halves
2021-09-12 14:54:38	Yes	28	Men	184	90	Madrid	National	8 years	2019-2020	Senior category, Youth categories	Between 5 and 6 games/week	FBM First National	Yes	No	To maintain or develop aerobic resistance (swimming, cycling, career, jumping, etc.), to maintain or develop muscle strength (different muscle strengthening techniques with machines, with free weight, with body weight itself, with elastic gums, etc.), to maintain or develop flexibility (either with the body, help from another person, or with elements such as towels, elastic rubber, foam roller, e…	Between 45 and 60 minutes	4-5 days	No		No				During the initial warm-up, During the break between halves
2021-09-12 15:26:11	Yes	31	Men	181	75	Madrid	Regional	8 years	2019-2020	Senior category, Youth categories	Between 5 and 6 games/week	1st FBM	Yes	No	To maintain or develop muscle strength (different muscle strengthening techniques with machines, with free weight, with body weight itself, with elastic rubber, etc.), to maintain or develop speed (ability to perform sprints in the shortest possible time possible and repeat them the greatest number of times)	More than 60 minutes	4-5 days	Yes	5-10 minutes	No			I have not considered if I need it	During the initial warm-up
2021-09-12 15:35:07	Yes	29	Men	177	64.6	Madrid	Local, Regional	12 years (National 7)	2020-2021	Senior category	Between 5 and 6 games/week	National First to Minibasket	Yes	No	To maintain or develop aerobic resistance (swimming, cycling, career, jumping, etc.), to maintain or develop muscle strength (different muscle strengthening techniques with machines, with free weight, with body weight itself, with elastic gums, etc.), to maintain or develop speed (ability to perform sprints in the shortest possible time and repeat them the largest number of times), to maintain or…	More than 60 minutes	4-5 days	No		No			Lack of habit or never doing it (or trying)	At the end of the game	I have never felt that I need them or that my recovery improves after doing them, so I finally decided to eliminate them from my routine
2021-09-12 15:39:12	Yes	31	Men	177	80	Madrid	Regional	8 years	2019-2020	Senior category	Between 3 and 4 games/week	National First	Yes	No	To maintain or develop aerobic resistance (swimming, cycling, career, jumping, etc.), to maintain or develop muscle strength (different muscle strengthening techniques with machines, with free weight, with body weight itself, with elastic rubber, etc.)	More than 60 minutes	6-7 days	No		No				Never
2021-09-12 16:27:23	Yes	50	Men	183	95	Madrid	Regional, National	32/25	2019-2020	Senior category, Youth categories	Between 6 and 7 games/week	1st EM NAC and Honor Division Basketball in Wheelle	Yes	No	To maintain or develop aerobic resistance (swimming, cycling, career, jumping, etc.)	Between 45 and 60 minutes	2-3 days	Yes	7-8 minutes	No			I do not have much time, between reviewing the record, clean yourself, comment how the game is going .....	At the end of the game
2021-09-12 16:34:54	Yes	34	Men	179	81	Madrid	Regional, National	17 years	2020-2021	Senior category, Youth categories	Between 3 and 4 games/week	Group 2, National	Yes	No	To maintain or develop muscle strength (different muscle strengthening techniques with machines, with free weight, with body weight itself, with elastic rubber, etc.)	More than 60 minutes	2-3 days	Yes	10 minutes	No			I prefer to rest and chat with the partner	During the initial warm-up
2021-09-12 16:49:31	Yes	29	Men	183	79	MADRID, MADRID	Local, Regional, National	Local 10 years, regional 10 years, National 1 year, International without experience	2018-2019	Senior category	Between 5 and 6 games/week	National and Autonomical Categories	Yes	Yes	To maintain or develop muscle strength (different muscle strengthening techniques with machines, with free weight, with body weight itself, with elastic rubber, etc.), to maintain or develop flexibility (either with the body itself, help from Another person, or with elements such as towels, elastic tires, foam roller, etc.)	More than 60 minutes	4-5 days	Yes	Between 5-10 minutes	No			It is not usually necessary	During the initial warm-up
2021-09-12 17:33:52	Yes	30	Women	179	70	Madrid	National	10 years regional 1 National	2020-2021	Senior category, Youth categories	Between 6 and 7 games/week	National. Spanish championships	Yes	No	To maintain or develop aerobic resistance (swimming, cycling, career, jumping, etc.), to maintain or develop muscle strength (different muscle strengthening techniques with machines, with free weight, with body weight itself, with elastic gums, etc.), to maintain or develop speed (ability to perform sprints in the shortest possible time and repeat them the largest number of times), to maintain or…	Between 45 and 60 minutes	4-5 days	Yes	3-5 minutes	Yes	Breath management techniques (activation/relaxation, awareness)	Stretching		During the initial warm-up, During the break between halves
2021-09-12 18:04:40	Yes	24	Women	174	58	Alcorcón, Madrid	Local, Regional, National	Local (2), regional (2), National (2)	2019-2020	Senior category	Between 4 and 5 games/week	National and quarry	Yes	No	To maintain or develop aerobic resistance (swimming, cycling, career, jumping, etc.)	Between 30 and 45 minutes	2-3 days	Yes	5-10 minutes	No			My impression is that I do not have time for it	During the initial warm-up, During the break between halves
2021-09-12 18:29:06	Yes	26	Women	165	57	Madrid	Local, Regional	6 years in general	2020-2021	Senior category	Between 4 and 5 games/week	Madrid	Yes	No	To maintain or develop aerobic resistance (swimming, cycling, career, jumping, etc.), to maintain or develop muscle strength (different muscle strengthening techniques with machines, with free weight, with body weight itself, with elastic rubber, etc.)	More than 60 minutes	4-5 days	Yes	5 to 10 minutes, according to the subsequent stretch	Yes	Stretches and joint mobility			During the initial warm-up, During the break between halves, At the end of the game
2021-09-12 19:21:57	Yes	32	Women	163	47.1	Madrid	Regional	5 years	2020-2021	Senior category, Youth categories	Between 5 and 6 games/week	1st Autonomic of Madrid	Yes	No	To maintain or develop aerobic resistance (swimming, cycling, career, jumping, etc.), to maintain or develop muscle strength (different muscle strengthening techniques with machines, with free weight, with body weight itself, with elastic rubber, etc.)	More than 60 minutes	2-3 days	Yes	10 minutes	No			I had never thought about performing some kind of activity in this part of the game	During the initial warm-up, During the break between halves
2021-09-12 19:34:20	Yes	43	Men	174	72	Madrid	Local, Regional	Local (25 years), Regional (25 years), National (without experience), International (without experience)	2018-2019	Senior category, Youth categories	Between 5 and 6 games/week	National, Senior, Sub22, Junior, Cadet, Children	Yes	No	To maintain or develop aerobic resistance (swimming, cycling, career, jumping, etc.)	Between 45 and 60 minutes	2-3 days	Yes	5-10 minutes	No			Lack of time and space	During the initial warm-up, During the break between halves, At the end of the game
2021-09-12 20:55:42	Yes	31	Men	183	80	Alcorcón, Madrid	Regional	3 years	2018-2019	Senior category	Between 5 and 6 games/week	National 1st	No	No	To maintain or develop aerobic resistance (swimming, cycling, career, jumping, etc.)	Less than 15 minutes	2-3 days	Yes	15 minutes	No			I do not need it	During the initial warm-up
2021-09-12 21:56:56	Yes	39	Men	167	59	Tafalla,Navarra	Regional	1 year	2020-2021	Youth categories	Between 3 and 4 games/week	Cadet, Infant	Yes	No	To maintain or develop aerobic resistance (swimming, cycling, career, jumping, etc.), to maintain or develop muscle strength (different muscle strengthening techniques with machines, with free weight, with body weight itself, with elastic gums, etc.), to maintain or develop flexibility (either with the body, help from another person, or with elements such as towels, elastic rubber, foam roller, e…	More than 60 minutes	4-5 days	Yes	5-10 minutes	Yes	Stretches and joint mobility	Activation		During the initial warm-up, At the break between the first and second quarters
2021-09-13 09:19:47	Yes	33	Men	188	89	Madrid	Local, Regional, National	Local 2 years, Regional 10 years, National 3 years	2020-2021	Senior category	Between 3 and 4 games/week	National, regional	Yes	No	To maintain or develop aerobic resistance (swimming, cycling, career, jumping, etc.), to maintain or develop muscle strength (different muscle strengthening techniques with machines, with free weight, with body weight itself, with elastic gums, etc.), to maintain or develop flexibility (either with the body itself, help from another person, or with elements such as towels, elastic gums, foam roll…	Between 45 and 60 minutes	6-7 days	Yes	5-10 minutes	Yes	Stretches and joint mobility	Do not lose concentration and physical intensity		During the initial warm-up, During the break between halves, At the end of the game
2021-09-13 10:05:45	Yes	38	Men	178	80	Velilla de San Antonio, Madrid	Regional, National	Regional (13) National (9)	2020-2021	Senior category, Youth categories	Between 1 and 2 games/week	National	Yes	No	To maintain or develop aerobic resistance (swimming, cycling, career, jumped to the commons, etc.), to maintain or develop speed (ability to perform sprints in the shortest possible time and repeat them the greatest number of times), for maintain or develop other capacities (coordination, balance, agility)	Between 45 and 60 minutes	4-5 days	Yes	10 minutes	Yes	Stretches and joint mobility, Breath management techniques (activation/relaxation, awareness)	Avoid injuries		During the initial warm-up, During the break between halves, At the end of the game
2021-09-13 10:18:26	Yes	32	Women	170	63	Madrid	Regional	4 years (Regional)	2019-2020	Senior category, Youth categories	7 or more games/week	Autonomic	Yes	No	To maintain or develop aerobic resistance (swimming, cycling, career, jumping, etc.), to maintain or develop muscle strength (different muscle strengthening techniques with machines, with free weight, with body weight itself, with elastic rubber, etc.)	Between 45 and 60 minutes	4-5 days	Yes	Stretching and joint mobility	Yes	Stretches and joint mobility	Maintain performance and even concentration		During the initial warm-up, At the break between the first and second quarters
2021-09-13 13:17:23	Yes	24	Men	190	85	Madrid	Regional	6 years Regional	2019-2020	Senior category	7 or more games/week	FBM First Autonomic	Yes	No	To maintain or develop aerobic resistance (swimming, cycling, career, jumping, etc.), to maintain or develop muscle strength (different muscle strengthening techniques with machines, with free weight, with body weight itself, with elastic gums, etc.), to maintain or develop speed (ability to perform sprints in the shortest possible time and repeat them the largest number of times)	More than 60 minutes	6-7 days	Yes	5 minutes	No	Jog or run, Stretches and joint mobility, Breath management techniques (activation/relaxation, awareness)		Games overload so you cannot disconnect during the break, therefore you are not required to connect again	During the initial warm-up, At the end of the game		Good luck in the project!
2021-09-13 17:46:04	Yes	30	Men	177	71	MADRID	Regional	13 years.	2018-2019	Senior category	7 or more games/week	1st Autonomic Madrid Federation	Yes	No	To maintain or develop aerobic resistance (swimming, cycling, career, jumping, etc.), to maintain or develop muscle strength (different muscle strengthening techniques with machines, with free weight, with body weight itself, with elastic rubber, etc.)	More than 60 minutes	4-5 days	Yes	5-10 minutes	No			The break consists of 10 minutes, and we use it to talk about the game, drink and review the record.	During the initial warm-up, At the end of the game
2021-09-13 20:12:51	Yes	38	Men	179	74	Huelva, Huelva	Regional	Local (2 years), Regional (10 years)	2019-2020	Senior category, Youth categories	Between 1 and 2 games/week	Provincial, regional	Yes	No	To maintain or develop aerobic resistance (swimming, cycling, career, jumping, etc.)	Between 30 and 45 minutes	2-3 days	Yes	10-15 minutes	No			There is no specific reason, maybe I can't find the moment between going to locker rooms, reviewing the record, etc.	During the initial warm-up, At the end of the game
2021-09-13 22:13:26	Yes	26	Men	197	91	Murcia	Regional	Local and Regional (3 years)	2020-2021	Senior category, Youth categories	Between 2 and 3 games/week	Autonomic, Junior, Cadet ...	No	No	To maintain or develop aerobic resistance (swimming, cycling, career, jumping, etc.)	Between 15 and 30 minutes	2-3 days	Yes	3-5 minutes	No			We usually use rest to talk to colleagues	During the initial warm-up
2021-09-13 22:13:28	Yes	29	Men	185	75	Murcia	Local, Regional	Local 5 regional 3	2018-2019	Senior category	Between 3 and 4 games/week	G1	Yes	No	To maintain or develop aerobic resistance (swimming, cycling, career, jumping, etc.), to maintain or develop muscle strength (different muscle strengthening techniques with machines, with free weight, with body weight itself, with elastic rubber, etc.)	Between 45 and 60 minutes	4-5 days	Yes	5-7 minutes	No			I'm still more or less warm and colleagues talk details of the game	During the initial warm-up
2021-09-13 22:14:31	Yes	24	Men	200	96.5	El Palmar, Murcia	Regional	Local (2 years)	2019-2020	Youth categories	Between 2 and 3 games/week	Cadet, Infantil, Alevín	Yes	No	To maintain or develop muscle strength (different muscle strengthening techniques with machines, with free weight, with body weight itself, with elastic rubber, etc.)	More than 60 minutes	4-5 days	Yes	5-10 minutes	No			I don`t usually have much time	During the initial warm-up
2021-09-13 22:18:17	Yes	36	Men	180	72	Murcia	Regional	Regional (15 years)	2019-2020	Senior category, Youth categories	Between 3 and 4 games/week	First division	Yes	No	To maintain or develop aerobic resistance (swimming, cycling, career, jumping, etc.)	Between 45 and 60 minutes	2-3 days	Yes	5-10 minutes	No	Jog or run, Strength exercise (jumps, push-ups, etc.), Stretches and joint mobility		Lack of time	During the initial warm-up
2021-09-13 22:19:14	Yes	45	Men	183	80	Cartagena ( Murcia )	Regional	8 years	2018-2019	Senior category, Youth categories	Between 2 and 3 games/week	Group 2	Yes	No	To maintain or develop aerobic resistance (swimming, cycling, career, jumping, etc.), to maintain or develop muscle strength (different muscle strengthening techniques with machines, with free weight, with body weight itself, with elastic rubber, etc.)	Between 30 and 45 minutes	4-5 days	Yes	5 minutes	No			I usually employ the break to review the record of the match ... Fouls for each team … players with more foulds… etc	During the initial warm-up, At the end of the game
2021-09-13 22:19:30	Yes	25	Women	155	53	Murcia	Local	4 y	2020-2021	Senior category, Youth categories	Between 4 and 5 games/week	2nd autonomic	Yes	No	To maintain or develop aerobic resistance (swimming, cycling, career, jumping, etc.), to maintain or develop flexibility (either with the body, help from another person, or with elements such as towels, elastic rubbers , Foam Roller, etc.)	More than 60 minutes	2-3 days	Yes	5 minutes	No			I use that time to relax the muscles	During the initial warm-up, At the end of the game
2021-09-13 22:24:07	Yes	48	Men	187	97	Bigastro alicante	National	17 years	2018-2019	Senior category, Youth categories	Between 3 and 4 games/week	Autonomics	Yes	No	To maintain or develop muscle strength (different muscle strengthening techniques with machines, with free weight, with body weight itself, with elastic rubber, etc.), to maintain or develop speed (ability to perform sprints in the shortest possible time possible and to repeat them the greatest number of times), to maintain or develop flexibility (either with the body itself, help from another pe…	Between 45 and 60 minutes	4-5 days	Yes	12 minutes	Yes	Stretches and joint mobility, Coordination and balance exercises	Do not enter the game cold		During the initial warm-up, During the break between halves, At the end of the game
2021-09-13 22:25:20	Yes	23	Women	161	54	Murcia	Regional	Local (3 years), Regional (3 years).	2020-2021	Senior category	Between 4 and 5 games/week	1st male and national female national	Yes	No	To maintain or develop aerobic resistance (swimming, cycling, career, jumping, etc.), to maintain or develop muscle strength (different muscle strengthening techniques with machines, with free weight, with body weight itself, with elastic gums, etc.), to maintain or develop speed (ability to perform sprints in the shortest possible time and repeat them the largest number of times)	Between 45 and 60 minutes	2-3 days	Yes	5 minutes	No			I have no habit or need.	During the initial warm-up, At the end of the game
2021-09-13 22:26:11	Yes	49	Men	174	68	Alcantarilla (Murcia)	Regional	11 years	2019-2020	Senior category, Youth categories	Between 4 and 5 games/week	National female, male national, 1 and 2 regional	No	No	To maintain or develop aerobic resistance (swimming, cycling, career, jumping, etc.)	Between 30 and 45 minutes	2-3 days	Yes	5-10 minutes	No			I activate mentally visualizing the first half	During the initial warm-up		Thanks for the questionnaire, I will help you if there are more in the future
2021-09-13 22:52:59	Yes	28	Men	184	80	Murcia	Regional	Regional 9	2019-2020	Senior category, Youth categories	Between 3 and 4 games/week	Male Division	Yes	No	To maintain or develop aerobic resistance (swimming, cycling, career, jumping, etc.), to maintain or develop muscle strength (different muscle strengthening techniques with machines, with free weight, with body weight itself, with elastic rubber, etc.)	More than 60 minutes	4-5 days	Yes	5 minutes	Yes	Stretches and joint mobility	To keep the muscles warm and prevent injuries. We also activate the body to continue the game.	I do some stretching, I do not consider it reactivation	During the initial warm-up, During the break between halves
2021-09-13 22:54:48	Yes	34	Men	190	85	Murcia	Regional	Regional (3 years)	2018-2019	Youth categories	Between 4 and 5 games/week	Group 2	Yes	No	To maintain or develop aerobic resistance (swimming, cycling, career, jumping, etc.), to maintain or develop muscle strength (different muscle strengthening techniques with machines, with free weight, with body weight itself, with elastic gums, etc.), to maintain or develop speed (ability to perform sprints in the shortest possible time and repeat them the largest number of times)	Between 45 and 60 minutes	2-3 days	Yes	10-15 minutes	No			I haven't needed it yet	During the initial warm-up, During the break between halves
2021-09-13 23:01:01	Yes	33	Men	170	71	La unión, Murcia	Regional	Regional (2 years)	2020-2021	Youth categories	Between 4 and 5 games/week	Group 2	Yes	No	To maintain or develop muscle strength (different muscle strengthening techniques with machines, with free weight, with body weight itself, with elastic rubber, etc.), to maintain or develop flexibility (either with the body itself, help from Another person, or with elements such as towels, elastic tires, foam roller, etc.)	Between 30 and 45 minutes	2-3 days	Yes	3-5 minutes	No			Due to being talking with my partner about the game	During the initial warm-up, At the end of the game
2021-09-13 23:34:24	Yes	31	Men	190	100	Murcia	Regional	5 years	2018-2019	Senior category	Between 4 and 5 games/week	Autonomous	Yes	No	To maintain or develop aerobic resistance (swimming, cycling, career, jumping, etc.), to maintain or develop muscle strength (different muscle strengthening techniques with machines, with free weight, with body weight itself, with elastic gums, etc.), to maintain or develop speed (ability to perform sprints in the shortest possible time and repeat them the largest number of times), to maintain or…	More than 60 minutes	4-5 days	Yes	Between 10 and 15 minutes	Yes	Stretches and joint mobility			During the initial warm-up, At the break between the first and second quarters, During the break between halves, At the break between the third and last quarter, At the end of the game		I have had hamstring problems, after working on it and increasing the range of flexibility, I had problems having vitiated movements, so I have to constantly work mobility and flexibility. When I exercise I don't notice it so much, but if I stop 3/4 days I return with some discomfort
2021-09-14 00:06:38	Yes	28	Men	184	73	Murcia	Regional, National	Regional 8 years National 4 years	2018-2019	Senior category, Youth categories	Between 1 and 2 games/week	FEB G3	Yes	Yes	To maintain or develop aerobic resistance (swimming, cycling, career, jumping, etc.), to maintain or develop muscle strength (different muscle strengthening techniques with machines, with free weight, with body weight itself, with elastic gums, etc.), to maintain or develop speed (ability to perform sprints in the shortest possible time and repeat them the largest number of times)	Between 45 and 60 minutes	4-5 days	Yes	8-10 minutes	No				At the end of the game
2021-09-14 00:47:38	Yes	28	Men	188	97.5	Murcia	Local, Regional	Local (4 years), Regional (2 years)	2018-2019	Senior category, Youth categories	Between 4 and 5 games/week	Group 2	Yes	No	To maintain or develop muscle strength (different muscle strengthening techniques with machines, with free weight, with body weight itself, with elastic rubber, etc.)	More than 60 minutes	4-5 days	Yes	3-5 minutes	No			I consider that I remain physically active.	During the initial warm-up, At the end of the game	To prevent future inconvenience
2021-09-14 07:00:41	Yes	21	Men	187	82	Murcia	Regional	Regional(3 years)	2019-2020	Youth categories	Between 4 and 5 games/week	Junior	Yes	No	To maintain or develop aerobic resistance (swimming, cycling, career, jumped to the commons, etc.), to maintain or develop speed (ability to perform sprints in the shortest possible time and repeat them the greatest number of times), for maintain or develop other capacities (coordination, balance, agility)	Between 30 and 45 minutes	4-5 days	Yes	4 minutes	No			I lose concentration in the game	During the initial warm-up, At the break between the first and second quarters, During the break between halves, At the break between the third and last quarter
2021-09-14 09:03:29	Yes	51	Men	183	95	Murcia	Regional	3 Local. 1 regional	2020-2021	Senior category, Youth categories	Between 1 and 2 games/week	Autonomic, Junior and Cadet	Yes	No	To maintain or develop aerobic resistance (swimming, cycling, career, jumping, etc.), to maintain or develop muscle strength (different muscle strengthening techniques with machines, with free weight, with body weight itself, with elastic gums, etc.), to maintain or develop speed (ability to perform sprints in the shortest possible time and repeat them the largest number of times), to maintain or…	More than 60 minutes	4-5 days	Yes	5 minutes	Yes	Stretches and joint mobility, Breath management techniques (activation/relaxation, awareness)	Focus on the game again		During the initial warm-up, During the break between halves, At the end of the game
2021-09-14 09:18:43	Yes	24	Women	173	64	Murcia	Local, Regional	Local 5 years Regional 5 years	2020-2021	Senior category, Youth categories	Between 4 and 5 games/week	Regional Group	Yes	Yes	To maintain or develop aerobic resistance (swimming, cycling, career, jumping, etc.), to maintain or develop muscle strength (different muscle strengthening techniques with machines, with free weight, with body weight itself, with elastic rubber, etc.)	More than 60 minutes	2-3 days	Yes	10 minutes	No	Jog or run, Running at maximum speed (sprinting), Stretches and joint mobility, Coordination and balance exercises		I have never thought about	During the initial warm-up
2021-09-14 09:34:37	Yes	27	Men	178	67	Murcia	Regional	Regional 5 years	2020-2021	Senior category, Youth categories	Between 3 and 4 games/week	From Infant to 1st Male Autonomic	Yes	No	To maintain or develop aerobic resistance (swimming, cycling, career, jumping, etc.), to maintain or develop muscle strength (different muscle strengthening techniques with machines, with free weight, with body weight itself, with elastic gums, etc.), to maintain or develop speed (ability to perform sprints in the shortest possible time and repeat them the largest number of times), to maintain or…	Between 45 and 60 minutes	4-5 days	Yes	5-10 minutes	Yes	Stretches and joint mobility	Do not let the body lose temperature thus costing to start the second part		During the initial warm-up, During the break between halves, At the break between the third and last quarter
2021-09-14 10:00:11	Yes	25	Men	185	80	Murcia	Regional	4 years	2019-2020	Senior category	Between 4 and 5 games/week	Group 2	Yes	No	To maintain or develop aerobic resistance (swimming, cycling, career, jumping, etc.), to maintain or develop muscle strength (different muscle strengthening techniques with machines, with free weight, with body weight itself, with elastic rubber, etc.)	More than 60 minutes	6-7 days	Yes	3-5 minutes	No			Because I have not created a habit to reactivate after a break between halves, I normally use that time to talk with the colleagues about different game issues, to go to the toilet and to verify the record.	At the end of the game
2021-09-14 11:08:26	Yes	25	Men	190	72	Beniaján	Local, Regional	3 years	2020-2021	Youth categories	Between 1 and 2 games/week	Group2-3	Yes	No	To maintain or develop aerobic resistance (swimming, cycling, career, jumping, etc.), to maintain or develop muscle strength (different muscle strengthening techniques with machines, with free weight, with body weight itself, with elastic rubber, etc.)	More than 60 minutes	4-5 days	No		No			Rest	During the initial warm-up
2021-09-14 12:47:57	Yes	28	Men	180	77	MADRID	Regional	8 years	2020-2021	Senior category, Youth categories	Between 6 and 7 games/week	National Madrid	Yes	No	To maintain or develop aerobic resistance (swimming, cycling, career, jumping, etc.), to maintain or develop muscle strength (different muscle strengthening techniques with machines, with free weight, with body weight itself, with elastic gums, etc.), to maintain or develop speed (ability to perform sprints in the shortest possible time and repeat them the largest number of times)	Between 45 and 60 minutes	4-5 days	No		No				During the initial warm-up, At the break between the first and second quarters, During the break between halves, At the break between the third and last quarter
2021-09-14 12:54:38	Yes	21	Women	174	64.5	Murcia	Local, Regional	Local 2 years. Regional 2 years	2018-2019	Youth categories	Between 2 and 3 games/week	From Mini to Junior	Yes	No				Yes	5-10 minutes	No			I am already activated	During the initial warm-up	Prevent injuries
2021-09-14 13:00:45	Yes	49	Men	184	93	Murcia	Local, Regional, National	Local and regional (15 years), National (3 years)	2018-2019	Senior category	Between 1 and 2 games/week	Veterans League	Yes	No	To maintain or develop aerobic resistance (swimming, cycling, career, jumping, etc.)	Between 45 and 60 minutes	2-3 days	Yes	Approximately 5 minutes	No			The rest is short (5 ')	During the initial warm-up
2021-09-14 13:11:16	Yes	25	Men	178	71	Murcia, murcia	Regional	Regional (5 years)	2019-2020	Senior category	Between 3 and 4 games/week	National	Yes	No	To maintain or develop muscle strength (different muscle strengthening techniques with machines, with free weight, with body weight itself, with elastic rubber, etc.)	More than 60 minutes	2-3 days	No		No			I use it to comment with the partner the course of the game	At the end of the game	Forgot
2021-09-14 22:08:32	Yes	48	Men	188	128	El Puerto de Santa Maria Cadiz	Local	7 years Local	2020-2021	Youth categories	Between 1 and 2 games/week	Provincial	Yes	No				No		No			Lack of time	Never
2021-09-15 00:38:43	Yes	38	Men	183	94	Rivas-Vaciamadrid, Madrid	Local, National	Local (13 years), National (8 years)	2018-2019	Senior category, Youth categories	Between 2 and 3 games/week	FEB Group 2, Regional	Yes	No	To maintain or develop aerobic resistance (swimming, cycling, career, jumping, etc.)	Between 45 and 60 minutes	2-3 days	Yes	6-12 minutes	Yes	Stretches and joint mobility, Breath management techniques (activation/relaxation, awareness)	Avoid returning to the court in conditions not suitable for correctly assessing the actions after the break		During the initial warm-up, During the break between halves, At the end of the game
2021-09-15 12:39:35	Yes	31	Men	183	81	Madrid	National	Regional (9), National (1)	2019-2020	Senior category	Between 3 and 4 games/week	National Madrid	Yes	No	To maintain or develop aerobic resistance (swimming, cycling, career, jumping, etc.), to maintain or develop muscle strength (different muscle strengthening techniques with machines, with free weight, with body weight itself, with elastic rubber, etc.)	More than 60 minutes	6-7 days	Yes	5-10 minutes	Yes	Strength exercise (jumps, push-ups, etc.)	To prepare the body again for the activity		During the initial warm-up
2021-09-15 13:06:13	Yes	27	Men	187	83.9	Toledo	National	Local (1 year), Regional (5 years) National (5 years)	2020-2021	Senior category	Between 1 and 2 games/week	FEB Group 1	Yes	Yes	To maintain or develop aerobic resistance (swimming, cycling, career, jumping, etc.), to maintain or develop muscle strength (different muscle strengthening techniques with machines, with free weight, with body weight itself, with elastic gums, etc.), to maintain or develop speed (ability to perform sprints in the shortest possible time and repeat them the largest number of times), to maintain or…	Between 45 and 60 minutes	4-5 days	Yes	10-15 minutes	No				During the initial warm-up, At the end of the game
2021-09-15 13:08:10	Yes	49	Men	176	90	La Roda, Albacete	Regional	4years	2019-2020	Youth categories	Between 3 and 4 games/week	Autonomic Junior, School	Yes	No	To maintain or develop aerobic resistance (swimming, cycling, career, jumped to the commons, etc.), to maintain or develop speed (ability to perform sprints in the shortest possible time and repeat them the greatest number of times), for maintain or develop other capacities (coordination, balance, agility)	Between 45 and 60 minutes	2-3 days	Yes	15 minutes	Yes	Breath management techniques (activation/relaxation, awareness)	Raise heart rate prior to the beginning		At the end of the game
2021-09-15 13:09:16	Yes	42	Men	186	100	MADRID	Local, Regional, National	National (7 years) Regional (15 years) Local (20 years)	2018-2019	Senior category, Youth categories	Between 2 and 3 games/week	National (male and female) 1st male autonomic, 2nd male autonomic, male and female junior, cadet and children and school.	Yes	No	To maintain or develop aerobic resistance (swimming, cycling, career, jumping, etc.), to maintain or develop muscle strength (different muscle strengthening techniques with machines, with free weight, with body weight itself, with elastic rubber, etc.)	Between 30 and 45 minutes	2-3 days	Yes	Between 5 and 10 minutes	No			Routine ignorance	During the initial warm-up, During the break between halves, At the end of the game
2021-09-15 13:10:09	Yes	43	Men	180	73	Guadalajara	National	25 years (4 regional y 21 National)	2020-2021	Senior category	Between 1 and 2 games/week	Group 1	Yes	Yes	To maintain or develop aerobic resistance (swimming, cycling, career, jumping, etc.), to maintain or develop muscle strength (different muscle strengthening techniques with machines, with free weight, with body weight itself, with elastic rubber, etc.)	Between 45 and 60 minutes	6-7 days	Yes	10-15 minutes	No			I prefer to use it to recover	At the end of the game
2021-09-15 13:12:39	Yes	23	Men	180	64	Toledo	Local, Regional	Local(1 year) , regional (2)	2019-2020	Senior category, Youth categories	Between 4 and 5 games/week	Junior, Senior Zonal, First Autonomic, FIRST NATIONAL FEMALE	Yes	No	To maintain or develop aerobic resistance (swimming, cycling, career, jumping, etc.), to maintain or develop muscle strength (different muscle strengthening techniques with machines, with free weight, with body weight itself, with elastic rubber, etc.)	Between 45 and 60 minutes	4-5 days	Yes	5-7 minutes	Yes	Stretches and joint mobility			During the break between halves, At the end of the game
2021-09-15 13:13:36	Yes	34	Men	176	85	Ciudad Real	Regional, National	National (5 years), Regional (15years)	2018-2019	Senior category, Youth categories	Between 4 and 5 games/week	First National Castilla La Mancha	Yes	No	To maintain or develop aerobic resistance (swimming, cycling, career, jumping, etc.), to maintain or develop muscle strength (different muscle strengthening techniques with machines, with free weight, with body weight itself, with elastic gums, etc.), to maintain or develop speed (ability to perform sprints in the shortest possible time and repeat them the largest number of times)	Between 45 and 60 minutes	4-5 days	Yes	5-10 minutes	Yes	Strength exercise (jumps, push-ups, etc.), Stretches and joint mobility	Do not lose the activation or concentration of the game		During the break between halves
2021-09-15 13:20:04	Yes	30	Men	192	89	Ciudad Real	Regional	Regional (5 years)	2018-2019	Senior category	Between 1 and 2 games/week	1 Autonomic FBCLM	Yes	No	To maintain or develop aerobic resistance (swimming, cycling, career, jumping, etc.), to maintain or develop muscle strength (different muscle strengthening techniques with machines, with free weight, with body weight itself, with elastic gums, etc.), to maintain or develop speed (ability to perform sprints in the shortest possible time and repeat them the largest number of times)	Between 45 and 60 minutes	4-5 days	Yes	10 minutes	Yes	Stretches and joint mobility	Not to be cold and have active joints to avoid injuries		During the initial warm-up, During the break between halves, At the end of the game	I have not finished fatigued after a game. I do at the end of the day, or after several games, but not for one.
2021-09-15 13:22:28	Yes	25	Men	188	92	Tarancón	Regional	Local (6 years) regional (6years)	2020-2021	Senior category	Between 2 and 3 games/week	Cadet and Children's Children. Regional and Zonal Junior. Senior First Autonomous and Zonal.	Yes	Yes	To maintain or develop muscle strength (different muscle strengthening techniques with machines, with free weight, with body weight itself, with elastic rubber, etc.), to maintain or develop speed (ability to perform sprints in the shortest possible time possible and repeat them the greatest number of times)	More than 60 minutes	4-5 days	No		No			I have never consider necessary to reactivate physically. I reactivate mentally but it is a small exercise of a minute.	Never
2021-09-15 13:23:47	Yes	32	Women	169	64	Toledo	Regional	12 years (National 7)	2020-2021	Senior category, Youth categories	Between 2 and 3 games/week	1 male nacuonal, 1 male autonomics, 1 female nacuonal, jr fem, jr masc, cadet masc, cadet fem, inf fem, infm, infm, masc, fos more, Alev fem	Yes	No	To maintain or develop aerobic resistance (swimming, cycling, career, jumping, etc.), to maintain or develop muscle strength (different muscle strengthening techniques with machines, with free weight, with body weight itself, with elastic rubber, etc.)	Between 45 and 60 minutes	4-5 days	Yes	5-10 minutes	No			I use the time for other tasks: Review record, talk to partner…	During the initial warm-up
2021-09-15 13:26:08	Yes	50	Men	166	68	Torrijos-Toledo	Local	Local	2018-2019	Senior category	Between 3 and 4 games/week	Senior female, regional, zonal, juniors, cadets, children and base sport	Yes	No	To maintain or develop the speed (ability to perform sprints in the shortest possible time and repeat them the greatest number of times), to maintain or develop flexibility (either with the body, help from another person, or with elements such as towels , elastic gums, foam roller, etc.), to maintain or develop other capacities (coordination, balance, agility)	Between 15 and 30 minutes	2-3 days	Yes	5-10 minutes	No			None	During the initial warm-up	Lack of habit
2021-09-15 13:29:35	Yes	45	Women	169	80	Ciudad Real	Local, Regional	Local 4 years, Regional 7 years	2019-2020	Senior category, Youth categories	Between 2 and 3 games/week	First female, first male autonomic, senior zonal, female and male junior, cadets, children, fry	Yes	No	To maintain or develop aerobic resistance (swimming, cycling, career, jumping, etc.)	Between 45 and 60 minutes	2-3 days	No		No			There is no time, I use that moment to talk to the referee team of aspects of the game.	Never
2021-09-15 13:32:08	Yes	27	Men	172	66	Ciudad Real	Local, Regional, National	Local 5 years Regional 4 years National 3 years	2020-2021	Senior category, Youth categories	Between 2 and 3 games/week	Old FEB Group 2, current group3. In autonomic categories: Second Autonomic, Junior, Cadets, Children	Yes	No	To maintain or develop aerobic resistance (swimming, cycling, career, jumped to the commons, etc.), to maintain or develop speed (ability to perform sprints in the shortest possible time and repeat them the greatest number of times), for maintain or develop other capacities (coordination, balance, agility)	More than 60 minutes	4-5 days	Yes	10-15 minutes	No			I do not consider that I need to reactivate physically.	During the initial warm-up
2021-09-15 13:43:31	Yes	51	Men	182	85	Toledo	Local, Regional, National	28 years	2018-2019	Senior category	Between 2 and 3 games/week	(Feb Group 3, Autonomic CLM 1st NAC)	Yes	No	To maintain or develop aerobic resistance (swimming, cycling, career, jumping, etc.)	More than 60 minutes	4-5 days	Yes	(10 minutes)	No				During the initial warm-up, At the end of the game
2021-09-15 13:45:41	Yes	25	Men	187	110	Hellín, Albacete	Local, Regional	Local (7) regional (4)	2020-2021	Youth categories	Between 2 and 3 games/week	Group 3 FBCLM	Yes	No	To maintain or develop aerobic resistance (swimming, cycling, career, jumping, etc.), to maintain or develop muscle strength (different muscle strengthening techniques with machines, with free weight, with body weight itself, with elastic rubber, etc.)	Between 45 and 60 minutes	4-5 days	Yes	Warm-up 5 minutes	No			I have no habit	During the initial warm-up
2021-09-15 13:49:38	Yes	38	Men	175	78	ALCÁZAR DE SAN JUAN	Regional, National	REGIONAL (18) National (6)	2018-2019	Senior category, Youth categories	Between 3 and 4 games/week	Group 2 from 2008 to 2015	No	No	To maintain or develop aerobic resistance (swimming, cycling, career, jumping, etc.)	Between 45 and 60 minutes	2-3 days	Yes	3 minutes	No			Because we don't have time during the break	During the initial warm-up
2021-09-15 14:05:57	Yes	24	Men	180	87	Murcia	Local	2 years	2019-2020	Youth categories	Between 1 and 2 games/week	Group 3	Yes	No	To maintain or develop aerobic resistance (swimming, cycling, career, jumping, etc.), to maintain or develop muscle strength (different muscle strengthening techniques with machines, with free weight, with body weight itself, with elastic gums, etc.), to maintain or develop speed (ability to perform sprints in the shortest possible time and repeat them the largest number of times), to maintain or…	More than 60 minutes	4-5 days	Yes	3 minutes	No			I don't think it is necessary	During the initial warm-up
2021-09-15 14:15:01	Yes	59	Men	174	90	Talavera de la reina	Regional	27 years	2020-2021	Senior category	Between 3 and 4 games/week	Zonal	Yes	No	To maintain or develop aerobic resistance (swimming, cycling, career, jumping, etc.)	Between 45 and 60 minutes	6-7 days	Yes	5-10 minutes	Yes	Stretches and joint mobility	Stretch legs and arms		During the initial warm-up		I am 57 years old and I like to be a basketball referee.
2021-09-15 14:50:04	Yes	51	Men	173	83	tomelloso, ciudad real	Regional	Regional(8 years)	2020-2021	Senior category, Youth categories	Between 3 and 4 games/week	Cadets, Junior, Infantil, Senior	Yes	No	To maintain or develop aerobic resistance (swimming, cycling, career, jumping, etc.)	Between 30 and 45 minutes	2-3 days	No		Yes	Stretches and joint mobility	Improvement in the physical response		During the initial warm-up, During the break between halves, At the end of the game		thank you
2021-09-15 14:56:11	Yes	55	Men	180	82	Ciudad Real (CIUDAD REAL)	Regional	36 years	2019-2020	Senior category, Youth categories	Between 2 and 3 games/week	1st Nac Mas and fem, senior, junior and school age categories	Yes	No	To maintain or develop aerobic resistance (swimming, cycling, career, jumping, etc.)	Between 45 and 60 minutes	2-3 days	Yes	15-20 minutes	No			I consider that there is little time and use it to talk with the colleagues	During the initial warm-up
2021-09-15 15:15:09	Yes	46	Men	171	88	Tarancon, Cuenca	Local, Regional	Local ( 26 years), Regional ( 20 years) National ( without experience) International ( without experience)	2018-2019	Senior category, Youth categories	Between 3 and 4 games/week	National FBCLM competitions, junior, infaltil and cadet, 2 female, 1 autonomic	Yes	No	To maintain or develop aerobic resistance (swimming, cycling, career, jumping, etc.)	Between 15 and 30 minutes	2-3 days	Yes	5-10 minutes	No			I don't see it very necessary	During the initial warm-up, At the end of the game
2021-09-15 15:42:53	Yes	29	Men	179	82	Madrigueras (Albacete)	National	Local 11 years, regional 10 years, National 8 years, International without experience	2018-2019	Senior category	Between 2 and 3 games/week	Group 2	Yes	No	To maintain or develop aerobic resistance (swimming, cycling, career, jumped to the commits, etc.), to maintain or develop speed (ability to perform sprints in the shortest possible time and repeat them the largest number of times)	Between 45 and 60 minutes	2-3 days	Yes	10 minutes	No			I use the break to analyze the game and correct things	During the initial warm-up, At the end of the game
2021-09-15 16:05:41	Yes	43	Men	183	85	Almagro (Ciudad Real)	Local, Regional, National	Local(22years) regional(19years) National (19 years)	2018-2019	Senior category	Between 2 and 3 games/week	National	Yes	No	To maintain or develop aerobic resistance (swimming, cycling, career, jumping, etc.), to maintain or develop muscle strength (different muscle strengthening techniques with machines, with free weight, with body weight itself, with elastic rubber, etc.)	Between 45 and 60 minutes	2-3 days	Yes	15 minutes	No			There is no time	During the initial warm-up
2021-09-15 19:06:17	Yes	39	Men	177	70	Madrid	Regional	Regional 16 years	2020-2021	Senior category, Youth categories	Between 3 and 4 games/week	1st National Madrid and other FBM competitions (Junior, Cadet, Children, Senior, etc)	Yes	No	To maintain or develop aerobic resistance (swimming, cycling, career, jumping, etc.)	Between 15 and 30 minutes	2-3 days	Yes	4-7 minutes	No	Jog or run, Running at maximum speed (sprinting), Stretches and joint mobility			During the initial warm-up
2021-09-16 12:55:02	Yes	23	Women	165	59	Zaragoza	Local	Local (3 years)	2019-2020	Senior category, Youth categories	Between 6 and 7 games/week	P3 and P2 in FAB	Yes	No	To maintain or develop aerobic resistance (swimming, cycling, career, jumping, etc.), to maintain or develop muscle strength (different muscle strengthening techniques with machines, with free weight, with body weight itself, with elastic gums, etc.), to maintain or develop speed (ability to perform sprints in the shortest possible time and repeat them the largest number of times)	More than 60 minutes	4-5 days	No		No			If I reactivate between halves, then I am tired and nervous; I use the breaks to relax.	During the initial warm-up
2021-09-16 13:06:44	Yes	28	Men	175	65	Zaragoza	Local, Regional	Local (5 years), Regional (5 years)	2020-2021	Senior category, Youth categories	Between 6 and 7 games/week	Autonomous	Yes	No	To maintain or develop aerobic resistance (swimming, cycling, career, jumping, etc.), to maintain or develop muscle strength (different muscle strengthening techniques with machines, with free weight, with body weight itself, with elastic gums, etc.), to maintain or develop speed (ability to perform sprints in the shortest possible time and repeat them the largest number of times)	More than 60 minutes	4-5 days	No		No				During the initial warm-up
2021-09-16 13:10:10	Yes	23	Men	181	69	Utebo, Zaragoza	Local, Regional	Local ( 4 years). Regional (2 years)	2019-2020	Senior category, Youth categories	Between 6 and 7 games/week	School, 3rd male and female Aragonese, 2nd male and female Aragonese, Junior Cto. of Aragon	Yes	No	To maintain or develop aerobic resistance (swimming, cycling, career, jumping, etc.), to maintain or develop muscle strength (different muscle strengthening techniques with machines, with free weight, with body weight itself, with elastic gums, etc.), to maintain or develop speed (ability to perform sprints in the shortest possible time and repeat them the largest number of times), to maintain or…	Between 15 and 30 minutes	2-3 days	Yes	Small jumps before starting (2 or 3) and quadriceps and calf stretching (10 seconds)	No			I focus on talking to the partner about the game	During the initial warm-up
2021-09-16 13:10:48	Yes	27	Men	180	77	ZARAGOZA,ZARAGOZA	Local, Regional, National	Local (9 years), REGIONAL (5 years) National (2 years)	2019-2020	Senior category	Between 5 and 6 games/week	Category 1 National Male A1 Aragon	Yes	No	To maintain or develop aerobic resistance (swimming, cycling, career, jumping, etc.), to maintain or develop muscle strength (different muscle strengthening techniques with machines, with free weight, with body weight itself, with elastic rubber, etc.)	More than 60 minutes	4-5 days	Yes	10-15 minutes	No			I consider that at that time of the game I am physically activated.	During the initial warm-up, At the end of the game
2021-09-16 13:16:31	Yes	49	Men	168	70	Zaragoza	Local	2 years	2019-2020	Youth categories	Between 2 and 3 games/week	School	Yes	No	To maintain or develop aerobic resistance (swimming, cycling, career, jumping, etc.), to maintain or develop muscle strength (different muscle strengthening techniques with machines, with free weight, with body weight itself, with elastic rubber, etc.)	Between 45 and 60 minutes	4-5 days	Yes	5 minutes	No	Jog or run, Running at maximum speed (sprinting), Stretches and joint mobility		There is little time during break	During the initial warm-up
2021-09-16 13:57:13	Yes	21	Men	174	77	Zaragoza	Local, Regional	Local (2 years), regional (2 years)	2019-2020	Youth categories	Between 4 and 5 games/week	FAB P3	Yes	No	To maintain or develop aerobic resistance (swimming, cycling, career, jumping, etc.), to maintain or develop flexibility (either with the body, help from another person, or with elements such as towels, elastic rubbers , Foam Roller, etc.), to maintain or develop other capacities (coordination, balance, agility)	Between 30 and 45 minutes	2-3 days	No		No				During the initial warm-up, During the break between halves, At the end of the game
2021-09-16 15:06:40	Yes	26	Men	180	80	Zaragoza	Regional	Local (7 years) Regional (5 years)	2018-2019	Senior category, Youth categories	7 or more games/week	Autonomic 2 of the Aragonese Basketball Federation	Yes	No	To maintain or develop aerobic resistance (swimming, cycling, career, jumped to the commits, etc.), to maintain or develop speed (ability to perform sprints in the shortest possible time and repeat them the largest number of times)	Between 45 and 60 minutes	4-5 days	No		No			None, I should do it.	At the end of the game
2021-09-16 15:12:12	Yes	44	Men	179	78	Alcázar de San Juan	Regional	3 years	2019-2020	Senior category, Youth categories	Between 6 and 7 games/week	Group 4	Yes	No	To maintain or develop aerobic resistance (swimming, cycling, career, jumping, etc.), to maintain or develop muscle strength (different muscle strengthening techniques with machines, with free weight, with body weight itself, with elastic rubber, etc.)	More than 60 minutes	4-5 days	Yes	10 minutes	No	Jog or run, Stretches and joint mobility		Rest and think	During the initial warm-up, At the end of the game
2021-09-16 15:27:59	Yes	33	Men	177	77	Zaragoza	Local, Regional, National	Local (1) Regional (5) National (5)	2019-2020	Senior category, Youth categories	Between 4 and 5 games/week	National	Yes	No	To maintain or develop aerobic resistance (swimming, cycling, career, jumping, etc.), to maintain or develop muscle strength (different muscle strengthening techniques with machines, with free weight, with body weight itself, with elastic rubber, etc.)	Between 45 and 60 minutes	4-5 days	No		No			I understand that I don't need it.	During the initial warm-up
2021-09-16 15:55:32	Yes	27	Men	185	88	zaragoza	Regional	Regional(9 years)	2019-2020	Senior category, Youth categories	Between 6 and 7 games/week	Group 1, Group 2 ...	Yes	No	To maintain or develop muscle strength (different muscle strengthening techniques with machines, with free weight, with body weight itself, with elastic rubber, etc.), to maintain or develop speed (ability to perform sprints in the shortest possible time possible and repeat them the greatest number of times)	Between 45 and 60 minutes	4-5 days	Yes	5-8 minutes	No				During the initial warm-up, At the end of the game
2021-09-16 17:03:03	Yes	34	Men	185	90	Zaragoza	Local, Regional, International	Local and regional 12 years. International 1 torneo	2018-2019	Senior category, Youth categories	Between 5 and 6 games/week	National	Yes	No	To maintain or develop aerobic resistance (swimming, cycling, career, jumping, etc.), to maintain or develop muscle strength (different muscle strengthening techniques with machines, with free weight, with body weight itself, with elastic gums, etc.), to maintain or develop speed (ability to perform sprints in the shortest possible time and repeat them the largest number of times), to maintain or…	Between 30 and 45 minutes	2-3 days	Yes	5-10 minutes	No			Be talking with colleagues about the game	During the initial warm-up, At the end of the game
2021-09-16 17:08:10	Yes	19	Men	184	101	Zaragoza Capital	Local	1 year	2020-2021	Youth categories	Between 3 and 4 games/week	Fry and benjamines	Yes	No	To maintain or develop aerobic resistance (swimming, cycling, career, jumping, etc.), to maintain or develop muscle strength (different muscle strengthening techniques with machines, with free weight, with body weight itself, with elastic rubber, etc.)	More than 60 minutes	4-5 days	No		Yes	Stretches and joint mobility	Not to be cold and thus be able to start the second half without problems		During the initial warm-up, During the break between halves
2021-09-16 18:26:23	Yes	42	Men	171	70	Ciudad Real	Local, Regional	Local (24 years) Regional (11 years)	2018-2019	Senior category, Youth categories	Between 4 and 5 games/week	1 'Autonomic Castilla La Mancha. Zonal Castilla La Mancha. Junior Castilla La Mancha. Local Ciudad Real	Yes	No	To maintain or develop aerobic resistance (swimming, cycling, career, jumping, etc.)	Between 45 and 60 minutes	4-5 days	Yes	5-10 minutes	No			Rest reviewing the game with the partner	During the initial warm-up, At the end of the game
2021-09-16 20:47:09	Yes	35	Men	189	82	Badaín	Regional	8 years	2020-2021	Senior category	7 or more games/week	Automic	Yes	No	To maintain or develop aerobic resistance (swimming, cycling, career, jumping, etc.)	Between 45 and 60 minutes	4-5 days	No		No				Never
2021-09-17 00:12:10	Yes	47	Men	174	78	Ciudad Real	Regional, National	Regional (12 years) National (3 years)	2019-2020	Senior category	Between 3 and 4 games/week	First National Fem and MASC, Junior, School Sports	Yes	No	To maintain or develop aerobic resistance (swimming, cycling, career, jumped to the commons, etc.), to maintain or develop speed (ability to perform sprints in the shortest possible time and repeat them the greatest number of times), for maintain or develop flexibility (either with the body itself, help from another person, or with elements such as towels, elastic rubber, foam roller, etc.)	Between 30 and 45 minutes	2-3 days	Yes	15 minutes	No			I Mentally reactive with partner by talking about the game and its development	During the initial warm-up		All the best. Thank you.
2021-09-17 08:32:38	Yes	21	Women	170	60	Zaragoza	Local	Local 2years	2019-2020	Senior category, Youth categories	Between 5 and 6 games/week	P1	Yes	No	To maintain or develop aerobic resistance (swimming, cycling, career, jumping, etc.), to maintain or develop muscle strength (different muscle strengthening techniques with machines, with free weight, with body weight itself, with elastic gums, etc.), to maintain or develop speed (ability to perform sprints in the shortest possible time and repeat them the largest number of times)	More than 60 minutes	4-5 days	No		Yes	Stretches and joint mobility, Breath management techniques (activation/relaxation, awareness)	Avoid injuries		During the initial warm-up, During the break between halves, At the end of the game
2021-09-17 12:24:24	Yes	21	Women	168	63	Zaragoza	Local	Local (2 years)	2020-2021	Senior category, Youth categories	Between 5 and 6 games/week	.	Yes	No	To maintain or develop aerobic resistance (swimming, cycling, career, jumping, etc.), to maintain or develop muscle strength (different muscle strengthening techniques with machines, with free weight, with body weight itself, with elastic gums, etc.), to maintain or develop speed (ability to perform sprints in the shortest possible time and repeat them the largest number of times), to maintain or…	More than 60 minutes	4-5 days	No		No				At the end of the game
2021-09-17 12:35:40	Yes	22	Men	183	70	Zaragoza, Zaragoza	Local, Regional	Local (5 years), Regional (3 years), National and International (without experience)	2019-2020	Senior category, Youth categories	Between 5 and 6 games/week	Caab Aragon. A4 Technical Group.	Yes	No	To maintain or develop aerobic resistance (swimming, cycling, career, jumping, etc.), to maintain or develop muscle strength (different muscle strengthening techniques with machines, with free weight, with body weight itself, with elastic rubber, etc.)	More than 60 minutes	2-3 days	No		No			Ignorance. I use the time to talk to the partner about game situations.	During the initial warm-up, At the end of the game
2021-09-17 13:31:20	Yes	3	Men	175	69	Albacete	Local, Regional, National	Local (30 years) National (20 years)	2019-2020	Senior category, Youth categories	Between 1 and 2 games/week	First National, First Autonomous, Junior, Base Sports	Yes	Yes	To maintain or develop aerobic resistance (swimming, cycling, career, jumping, etc.), to maintain or develop muscle strength (different muscle strengthening techniques with machines, with free weight, with body weight itself, with elastic gums, etc.), to maintain or develop speed (ability to perform sprints in the shortest possible time and repeat them the largest number of times), to maintain or…	More than 60 minutes	6-7 days	Yes	10 minutes	Yes	Stretches and joint mobility, Coordination and balance exercises	Do not lose concentration in the first minutes of the third quarter due to the break		During the initial warm-up, During the break between halves
2021-09-17 15:22:30	Yes	21	Women	169	65	Zaragoza	Local	Local 3 years	2018-2019	Senior category, Youth categories	Between 4 and 5 games/week	Schoolchildren, second female Aragonese, male, championship of Aragon Junior Primera and Junior Segundo	Yes	No	To maintain or develop aerobic resistance (swimming, cycling, career, jumping, etc.), to maintain or develop muscle strength (different muscle strengthening techniques with machines, with free weight, with body weight itself, with elastic rubber, etc.)	Between 45 and 60 minutes	4-5 days	No	0 minutes	No			It would be positive if I did it, however it is true that most of that time in federated games I use to talk with the partner the game and things to improve or how to continue	During the initial warm-up
2021-09-17 16:21:16	Yes	19	Women	164	55	Teruel	Local, Regional	Local 5 years, Regional 3 years, the remaining without experience	2019-2020	Senior category, Youth categories	Between 3 and 4 games/week	SCHOOL, MUNICIPAL TUROLEnse, CTO ARAGÓN 3º MASC, 2ºMASCY 2ºFEM	Yes	No	To maintain or develop aerobic resistance (swimming, cycling, career, jumped to the commons, etc.), to maintain or develop speed (ability to perform sprints in the shortest possible time and repeat them the greatest number of times), for maintain or develop other capacities (coordination, balance, agility)	Between 45 and 60 minutes	4-5 days	Yes	5-10 minutes	No			Because I reactive quickly, in the first two plays of the quarter.	During the initial warm-up
2021-09-17 19:09:32	Yes	39	Men	175	92	Monzón, Huesca	Regional	20 y	2020-2021	Senior category	Between 2 and 3 games/week	Autonomics at most	Yes	Yes	To maintain or develop muscle strength (different muscle strengthening techniques with machines, with free weight, with body weight itself, with elastic rubber, etc.)	Between 45 and 60 minutes	4-5 days	No		No			I have never proposed it, nor have they explained its need to me	During the initial warm-up
2021-09-17 20:11:05	Yes	25	Women	169	85	Zaragoza	Regional	7 years	2020-2021	Senior category	Between 6 and 7 games/week	Autonomics	Yes					No		No				Never
2021-09-18 14:25:08	Yes	27	Men	178	67	Torrox, Malga	Local, Regional, National	Local (5years) Regional (5 years) National (2years)	2019-2020	Senior category	Between 6 and 7 games/week	Autonomics	Yes	No	To maintain or develop aerobic resistance (swimming, cycling, career, jumping, etc.), to maintain or develop muscle strength (different muscle strengthening techniques with machines, with free weight, with body weight itself, with elastic gums, etc.), to maintain or develop flexibility (either with the body itself, help from another person, or with elements such as towels, elastic gums, foam roll…	Between 45 and 60 minutes	2-3 days	Yes	5-10 minutes	No			I do not consider that I lose activation during the break	During the initial warm-up, At the end of the game
2021-09-18 14:25:41	Yes	26	Men	205	99.1	Málaga	National	Regional 5 years	2019-2020	Senior category	Between 4 and 5 games/week	Provincial	Yes		To maintain or develop muscle strength (different muscle strengthening techniques with machines, with free weight, with body weight itself, with elastic rubber, etc.), to maintain or develop speed (ability to perform sprints in the shortest possible time possible and repeat them the greatest number of times)	More than 60 minutes	4-5 days	Yes	5-10 minutes	No			I use the breaks for technical work of the match	During the initial warm-up
2021-09-18 14:25:53	Yes	27	Women	176	79	Granada	Regional	Local (6 years) regional (4 years)	2020-2021	Senior category, Youth categories	7 or more games/week	National and provincial	Yes	No	To maintain or develop aerobic resistance (swimming, cycling, career, jumping, etc.), to maintain or develop muscle strength (different muscle strengthening techniques with machines, with free weight, with body weight itself, with elastic gums, etc.), to maintain or develop speed (ability to perform sprints in the shortest possible time and repeat them the largest number of times)	More than 60 minutes	6-7 days	No		No			I prefer to talk to the partner about the game	At the end of the game
2021-09-18 14:26:15	Yes	29	Men	180	86	Granada	Local, Regional	Local (10 years) Regional (5 years)	2020-2021	Senior category, Youth categories	Between 3 and 4 games/week	1st Andaluza	Yes	No	To maintain or develop aerobic resistance (swimming, cycling, career, jumping, etc.), to maintain or develop muscle strength (different muscle strengthening techniques with machines, with free weight, with body weight itself, with elastic gums, etc.), to maintain or develop other capacities (coordination, balance, agility)	Between 45 and 60 minutes	2-3 days	Yes	10-15 minutes	No			There is not enough time for it.	During the initial warm-up
2021-09-18 14:26:21	Yes	28	Men	190	82	Madrid	Local, Regional	8 years	2020-2021	Senior category, Youth categories	Between 2 and 3 games/week	Provincial and First National	Yes	No	To maintain or develop aerobic resistance (swimming, cycling, career, jumping, etc.), to maintain or develop muscle strength (different muscle strengthening techniques with machines, with free weight, with body weight itself, with elastic gums, etc.), to maintain or develop speed (ability to perform sprints in the shortest possible time and repeat them the largest number of times), to maintain or…	More than 60 minutes	6-7 days	Yes	10 minutes	No			I have never considered this option	During the initial warm-up, At the end of the game
2021-09-18 14:26:23	Yes	31	Men	193	90	Jerez, Cadiz	Local, Regional	4/2	2019-2020	Senior category	Between 3 and 4 games/week	National	Yes	Yes	To maintain or develop aerobic resistance (swimming, cycling, career, jumping, etc.), to maintain or develop muscle strength (different muscle strengthening techniques with machines, with free weight, with body weight itself, with elastic gums, etc.), to maintain or develop speed (ability to perform sprints in the shortest possible time and repeat them the largest number of times)	More than 60 minutes	6-7 days	Yes	10 minutes	No	Jog or run, Stretches and joint mobility		I'm still active during the break trying not to relax excessively	During the initial warm-up
2021-09-18 14:26:32	Yes	31	Men	178	73	Málaga	Regional	9 y	2020-2021	Senior category	Between 2 and 3 games/week	NATIONAL	Yes	No	To maintain or develop aerobic resistance (swimming, cycling, career, jumping, etc.), to maintain or develop muscle strength (different muscle strengthening techniques with machines, with free weight, with body weight itself, with elastic gums, etc.), to maintain or develop speed (ability to perform sprints in the shortest possible time and repeat them the largest number of times), to maintain or…	Between 30 and 45 minutes	4-5 days	Yes	25 minutes	No	Other		Reluctance	During the initial warm-up, At the end of the game
2021-09-18 14:26:43	Yes	29	Men	182	92	Granada	Local	4 y	2020-2021	Senior category, Youth categories	Between 6 and 7 games/week	Provincial	Yes	No	To maintain or develop aerobic resistance (swimming, cycling, career, jumped to the commits, etc.), to maintain or develop speed (ability to perform sprints in the shortest possible time and repeat them the largest number of times)	Between 30 and 45 minutes	4-5 days	Yes	10 minutes	Yes	Running at maximum speed (sprinting), Stretches and joint mobility	Not to start cold in the second part		During the initial warm-up, During the break between halves	Normally I use them as relaxation or cooling
2021-09-18 14:26:44	Yes	25	Women	172	63	Sevilla	Local, Regional	Local 7 years. Regional 1 Season	2018-2019	Senior category, Youth categories	Between 4 and 5 games/week	Provincial category	Yes	No	To maintain or develop aerobic resistance (swimming, cycling, career, jumping, etc.), to maintain or develop muscle strength (different muscle strengthening techniques with machines, with free weight, with body weight itself, with elastic gums, etc.), to maintain or develop speed (ability to perform sprints in the shortest possible time and repeat them the largest number of times), to maintain or…	More than 60 minutes	4-5 days	Yes	4 minutes	No			Time is relatively short (10 minutes).	At the end of the game
2021-09-18 14:26:45	Yes	28	Men	174	72	Tarifa, Cádiz	Regional	Regional 6 years	2020-2021	Senior category	Between 2 and 3 games/week	National First	Yes	No	To maintain or develop aerobic resistance (swimming, cycling, career, jumping, etc.), to maintain or develop muscle strength (different muscle strengthening techniques with machines, with free weight, with body weight itself, with elastic gums, etc.), to maintain or develop speed (ability to perform sprints in the shortest possible time and repeat them the largest number of times), to maintain or…	Between 45 and 60 minutes	4-5 days	Yes	4 minutes	Yes	Jog or run, Running at maximum speed (sprinting), Stretches and joint mobility, Breath management techniques (activation/relaxation, awareness)	Jumps, runnning in the hallway and active stretching		During the initial warm-up, At the end of the game
2021-09-18 14:27:06	Yes	27	Women	170	64	San Fernando, Cádiz	Local, Regional	Local (4 years), Regional (1 year)	2020-2021	Senior category, Youth categories	Between 3 and 4 games/week	FAB	Yes	No	To maintain or develop muscle strength (different muscle strengthening techniques with machines, with free weight, with body weight itself, with elastic rubber, etc.)	Between 45 and 60 minutes	2-3 days	Yes	10 minutes	No			I do not need it	During the initial warm-up
2021-09-18 14:27:32	Yes	32	Men	183	110	Granada	Local, Regional	Local (15 years), Regional (8 years)	2020-2021	Senior category, Youth categories	Between 2 and 3 games/week	Fab and Fabgraranada	Yes	Yes	To maintain or develop aerobic resistance (swimming, cycling, career, jumping, etc.), to maintain or develop muscle strength (different muscle strengthening techniques with machines, with free weight, with body weight itself, with elastic rubber, etc.)	Between 30 and 45 minutes	2-3 days	Yes	5 minutes	No			I don't think the stop time is necessary.	During the initial warm-up, At the end of the game
2021-09-18 14:27:37	Yes	25	Men	191	76	Almería	Local, Regional	Local 2, regional 2	2020-2021	Senior category, Youth categories	Between 5 and 6 games/week	1st Andaluza	Yes	No	To maintain or develop aerobic resistance (swimming, cycling, career, jumping, etc.), to maintain or develop muscle strength (different muscle strengthening techniques with machines, with free weight, with body weight itself, with elastic rubber, etc.)	Between 45 and 60 minutes	4-5 days	Yes	5 minutes	No			I had never thought about it. I always tend to be active in the third quarter without the need to exercise	During the initial warm-up
2021-09-18 14:27:41	Yes	32	Men	178	84	Cádiz	Regional	4 y	2020-2021	Senior category, Youth categories	Between 2 and 3 games/week	National	Yes	No	To maintain or develop muscle strength (different muscle strengthening techniques with machines, with free weight, with body weight itself, with elastic rubber, etc.)	More than 60 minutes	4-5 days	Yes	5-10 minutes	No			Match reading and physical relaxation	During the initial warm-up
2021-09-18 14:27:44	Yes	23	Men	187	71	Cádiz	Local, Regional	Local 5 years. Regional without experience	2020-2021	Senior category, Youth categories	Between 3 and 4 games/week	FAB	Yes	No	To maintain or develop aerobic resistance (swimming, cycling, career, jumped to the Comba, etc.), to maintain or develop other capacities (coordination, balance, agility)	Between 15 and 30 minutes	2-3 days	Yes	5 minutes running	No	Other		I usually use the break to talk with my partner about aspects of the game	During the initial warm-up
2021-09-18 14:28:03	Yes	26	Men	187	89	Jaén	Local, National	Local 4 years - National 2 years	2020-2021	Senior category, Youth categories	Between 4 and 5 games/week	National and provincial	No	No		Between 45 and 60 minutes	4-5 days	Yes	5-10 minutes	No			Body rest, hydration	During the initial warm-up, At the end of the game
2021-09-18 14:28:04	Yes	30	Men	187	90	Almeria	Local, Regional	Local (7 years) regional ( 4 years)	2020-2021	Senior category, Youth categories	7 or more games/week	National First	Yes	No	To maintain or develop aerobic resistance (swimming, cycling, career, jumping, etc.), to maintain or develop muscle strength (different muscle strengthening techniques with machines, with free weight, with body weight itself, with elastic gums, etc.), to maintain or develop speed (ability to perform sprints in the shortest possible time and repeat them the largest number of times)	Between 45 and 60 minutes	4-5 days	Yes	10 minutes	Yes	Stretches and joint mobility	To avoid injuries		During the initial warm-up, During the break between halves, At the end of the game
2021-09-18 14:28:10	Yes	21	Men	176	58.5	Jaén, Jaén	Local, Regional	Local 3 years	2020-2021	Senior category, Youth categories	Between 4 and 5 games/week	Provincial	Yes	No	To maintain or develop aerobic resistance (swimming, cycling, career, jumping, etc.)	Between 45 and 60 minutes	2-3 days	No		No				During the initial warm-up
2021-09-18 14:28:20	Yes	28	Men	177	75	Granada	Local, Regional	6 y	2020-2021	Senior category	7 or more games/week	Provincial, Autonomic N1	Yes	No	To maintain or develop aerobic resistance (swimming, cycling, career, jumping, etc.), to maintain or develop muscle strength (different muscle strengthening techniques with machines, with free weight, with body weight itself, with elastic gums, etc.), to maintain or develop speed (ability to perform sprints in the shortest possible time and repeat them the largest number of times), to maintain or…	More than 60 minutes	2-3 days	Yes	Between 5-8 minutes	No	Jog or run, Running at maximum speed (sprinting), Stretches and joint mobility		I had never thought about it	During the initial warm-up, At the end of the game
2021-09-18 14:28:21	Yes	28	Men	175	70.5	Almeria	Local	7 y	2020-2021	Senior category, Youth categories	7 or more games/week	Provincial	Yes	No	To maintain or develop aerobic resistance (swimming, cycling, career, jumping, etc.), to maintain or develop muscle strength (different muscle strengthening techniques with machines, with free weight, with body weight itself, with elastic gums, etc.), to maintain or develop speed (ability to perform sprints in the shortest possible time and repeat them the largest number of times)	More than 60 minutes	4-5 days	Yes	10-15 minutes	Yes	Stretches and joint mobility, Coordination and balance exercises	Avoid injuries		During the initial warm-up, During the break between halves, At the end of the game	There is no scientific evidence of its benefits post training or post game
2021-09-18 14:28:25	Yes	29	Women	172	66	Huelva	Local, Regional	Local (10 years) Regional (3 years)	2020-2021	Senior category, Youth categories	Between 4 and 5 games/week	Local and autonomic category	Yes	No	To maintain or develop aerobic resistance (swimming, cycling, career, jumping, etc.), to maintain or develop muscle strength (different muscle strengthening techniques with machines, with free weight, with body weight itself, with elastic gums, etc.), to maintain or develop speed (ability to perform sprints in the shortest possible time and repeat them the largest number of times)	Between 45 and 60 minutes	4-5 days	Yes	5-10 minutes	No			I invest the time in recovery	At the end of the game
2021-09-18 14:28:32	Yes	22	Men	190	70	Huércal de Almería, Almería	Local, Regional	Local 7 years Regional 1 year	2020-2021	Senior category, Youth categories	7 or more games/week	National 1 2020-2021	Yes	No	To maintain or develop aerobic resistance (swimming, cycling, career, jumping, etc.)	Between 30 and 45 minutes	4-5 days	Yes	10 minutes	Yes	Jog or run, Running at maximum speed (sprinting), Stretches and joint mobility	To continue concentrated and re-activate		During the initial warm-up, During the break between halves
2021-09-18 14:29:02	Yes	28	Men	180	80	Almería	Local, Regional	Local (11years), Regional (1er year)	2020-2021	Senior category, Youth categories	7 or more games/week	Provincial and Autonomous Championships	Yes	No	To maintain or develop aerobic resistance (swimming, cycling, career, jumping, etc.), to maintain or develop muscle strength (different muscle strengthening techniques with machines, with free weight, with body weight itself, with elastic gums, etc.), to maintain or develop flexibility (either with the body, help from another person, or with elements such as towels, elastic rubber, foam roller, e…	Between 45 and 60 minutes	4-5 days	Yes	5-10minutes	No			Exercising at rest has not been considered	During the initial warm-up, During the break between halves, At the end of the game
2021-09-18 14:29:10	Yes	25	Men	179	82	Málaga	Regional	Local(5 years), Regional(2 years)	2020-2021	Senior category, Youth categories	Between 4 and 5 games/week	Regional	Yes	No	To maintain or develop aerobic resistance (swimming, cycling, career, jumping, etc.), to maintain or develop muscle strength (different muscle strengthening techniques with machines, with free weight, with body weight itself, with elastic rubber, etc.)	Between 45 and 60 minutes	4-5 days	Yes	10 minutes	No			Time	During the initial warm-up
2021-09-18 14:29:26	Yes	28	Men	177	69	Arcos de la Frontera, Cádiz	Local, Regional	Regional(5 years)	2020-2021	Senior category, Youth categories	Between 4 and 5 games/week	FAB	Yes	Yes	To maintain or develop aerobic resistance (swimming, cycling, career, jumping, etc.), to maintain or develop muscle strength (different muscle strengthening techniques with machines, with free weight, with body weight itself, with elastic rubber, etc.)	More than 60 minutes	4-5 days	Yes	5-10 minutes	No			I try to communicate with my partner about how the game is going, aspects to improveme	At the end of the game
2021-09-18 14:29:31	Yes	30	Women	180	75	Málaga	National	6 y	2020-2021	Senior category, Youth categories	7 or more games/week	National First	Yes	No	To maintain or develop aerobic resistance (swimming, cycling, career, jumping, etc.), to maintain or develop muscle strength (different muscle strengthening techniques with machines, with free weight, with body weight itself, with elastic rubber, etc.)	More than 60 minutes	4-5 days	Yes	20 minutes	No	Jog or run, Running at maximum speed (sprinting), Stretches and joint mobility, Other	Concentrate again		During the initial warm-up
2021-09-18 14:29:36	Yes	38	Men	188	90	Almería	Local, Regional	17 years	2018-2019	Senior category, Youth categories	Between 5 and 6 games/week	National 1st	Yes	No	To maintain or develop muscle strength (different muscle strengthening techniques with machines, with free weight, with body weight itself, with elastic rubber, etc.)	Between 45 and 60 minutes	2-3 days	Yes	10 minutes	Yes	Jog or run, Stretches and joint mobility	Be prepared for the next quarter		During the initial warm-up, During the break between halves, At the end of the game
2021-09-18 14:29:55	Yes	35	Men	176	83	Andújar Jaén	Regional	6 y	2020-2021	Senior category, Youth categories	Between 3 and 4 games/week	National Andalusian	Yes	No	To maintain or develop aerobic resistance (swimming, cycling, career, jumping, etc.), to maintain or develop muscle strength (different muscle strengthening techniques with machines, with free weight, with body weight itself, with elastic gums, etc.), to maintain or develop flexibility (either with the body itself, help from another person, or with elements such as towels, elastic gums, foam roll…	Between 45 and 60 minutes	2-3 days	Yes	5-7 minutes	No			For rest, it suits me better	During the initial warm-up, During the break between halves, At the end of the game
2021-09-18 14:30:13	Yes	31	Women	181	73	Córdoba	Local, National	Local (7 years), National(4 years)	2020-2021	Senior category, Youth categories	Between 3 and 4 games/week	Mini, Infant, Cadet, Senior	Yes	Yes	To maintain or develop aerobic resistance (swimming, cycling, career, jumping, etc.), to maintain or develop muscle strength (different muscle strengthening techniques with machines, with free weight, with body weight itself, with elastic gums, etc.), to maintain or develop speed (ability to perform sprints in the shortest possible time and repeat them the largest number of times)	More than 60 minutes	2-3 days	Yes	8-12 minutes	Yes	Strength exercise (jumps, push-ups, etc.), Stretches and joint mobility	To be physically prepared in the game and prevent injuries		During the initial warm-up, During the break between halves
2021-09-18 14:30:43	Yes	25	Women	180	61	Bailén	Local, Regional	4 y	2020-2021	Senior category, Youth categories	Between 6 and 7 games/week	Provincial	Yes	No	To maintain or develop aerobic resistance (swimming, cycling, career, jumping, etc.), to maintain or develop muscle strength (different muscle strengthening techniques with machines, with free weight, with body weight itself, with elastic rubber, etc.)	Between 30 and 45 minutes	2-3 days	Yes	10 minutes	Yes	Jog or run, Stretches and joint mobility	To avoid injuries and have a good recovery		During the initial warm-up, At the end of the game
2021-09-18 14:30:45	Yes	32	Women	163	55	Málaga	Regional	Local (5) Regional (1) National (0)	2018-2019	Senior category	7 or more games/week	Provincial	Yes	No	To maintain or develop aerobic resistance (swimming, cycling, career, jumping, etc.), to maintain or develop flexibility (either with the body, help from another person, or with elements such as towels, elastic rubbers , Foam Roller, etc.)	Between 30 and 45 minutes	6-7 days	Yes	10 minutes	No	Jog or run, Running at maximum speed (sprinting), Stretches and joint mobility			During the initial warm-up, At the end of the game
2021-09-18 14:31:04	Yes	41	Women	165	65	Málaga	Regional	Local 22 years, Regional 10 years	2020-2021	Senior category, Youth categories	7 or more games/week	National	Yes	No	To maintain or develop aerobic resistance (swimming, cycling, career, jumping, etc.), to maintain or develop muscle strength (different muscle strengthening techniques with machines, with free weight, with body weight itself, with elastic gums, etc.), to maintain or develop speed (ability to perform sprints in the shortest possible time and repeat them the largest number of times), to maintain or…	Between 45 and 60 minutes	4-5 days	Yes	10 minutes	Yes	Jog or run, Strength exercise (jumps, push-ups, etc.), Stretches and joint mobility, Coordination and balance exercises	Because I don't want to stop		During the initial warm-up, At the end of the game
2021-09-18 14:31:07	Yes	26	Women	176	62	Málaga	Regional	Local (5 years), Regional (2 years)	2018-2019	Senior category	Between 3 and 4 games/week	N1	Yes	Yes	To maintain or develop aerobic resistance (swimming, cycling, career, jumping, etc.), to maintain or develop muscle strength (different muscle strengthening techniques with machines, with free weight, with body weight itself, with elastic gums, etc.), to maintain or develop other capacities (coordination, balance, agility)	More than 60 minutes	4-5 days	Yes	15 minutes	Yes	Jog or run	To avoid injuries		During the initial warm-up, During the break between halves, At the end of the game
2021-09-18 14:32:26	Yes	21	Men	182	73	Málaga	National	Local 3 years National 0 years	2020-2021	Senior category, Youth categories	Between 3 and 4 games/week	Local Provincial	Yes	No	To maintain or develop aerobic resistance (swimming, cycling, career, jumping, etc.), to maintain or develop muscle strength (different muscle strengthening techniques with machines, with free weight, with body weight itself, with elastic gums, etc.), to maintain or develop speed (ability to perform sprints in the shortest possible time and repeat them the largest number of times)	Between 45 and 60 minutes	2-3 days	No		No				During the initial warm-up
2021-09-18 14:32:30	Yes	2	Men	177	62	Marbella	Regional, National	Regional 16 years, National 4 years	2020-2021	Senior category, Youth categories	Between 2 and 3 games/week	N1	Yes	No	To maintain or develop aerobic resistance (swimming, cycling, career, jumping, etc.), to maintain or develop muscle strength (different muscle strengthening techniques with machines, with free weight, with body weight itself, with elastic rubber, etc.)	Between 45 and 60 minutes	2-3 days	Yes	10 minutes	No			I need to rest	During the initial warm-up
2021-09-18 14:32:31	Yes	25	Men	181	73	Sevilla	Local, Regional	Local (6 years) Regional (2years)	2020-2021	Senior category, Youth categories	Between 4 and 5 games/week	Provincial, national	Yes	No	To maintain or develop aerobic resistance (swimming, cycling, career, jumping, etc.), to maintain or develop muscle strength (different muscle strengthening techniques with machines, with free weight, with body weight itself, with elastic rubber, etc.)	Between 45 and 60 minutes	2-3 days	Yes	Between 15 and 20 minutes	No			Rest and back to calm	During the initial warm-up, At the end of the game
2021-09-18 14:32:55	Yes	28	Men	191	79	Granada	Local, Regional	Local 8, Regional 3	2020-2021	Senior category, Youth categories	Between 4 and 5 games/week	Provincial and national	Yes	No	To maintain or develop aerobic resistance (swimming, cycling, career, jumping, etc.), to maintain or develop muscle strength (different muscle strengthening techniques with machines, with free weight, with body weight itself, with elastic gums, etc.), to maintain or develop other capacities (coordination, balance, agility)	More than 60 minutes	4-5 days	Yes	5 minutes	Yes	Jog or run, Running at maximum speed (sprinting)	Concentration		During the initial warm-up, During the break between halves
2021-09-18 14:32:59	Yes	24	Men	192	90	Málaga	National	Local (3 years) National (2 years)	2020-2021	Senior category	Between 5 and 6 games/week	Provincial and national	Yes	No	To maintain or develop aerobic resistance (swimming, cycling, career, jumping, etc.)	Between 30 and 45 minutes	2-3 days	Yes	15 minutes	No			Talk about technical issues of the match	During the initial warm-up
2021-09-18 14:33:25	Yes	26	Men	170	57	Málaga	National	Local (5 years), National (1 year)	2020-2021	Senior category, Youth categories	Between 4 and 5 games/week	Provincial arbitration	Yes	No	To maintain or develop aerobic resistance (swimming, cycling, career, jumped to the commits, etc.), to maintain or develop speed (ability to perform sprints in the shortest possible time and repeat them the largest number of times)	Between 45 and 60 minutes	2-3 days	Yes	3-5 minutes	No				During the initial warm-up, At the end of the game
2021-09-18 14:33:51	Yes	27	Women	164	51	Huelva	Local, Regional	Local 6 years, Regional starting	2020-2021	Senior category, Youth categories	Between 2 and 3 games/week	Infant, Cadet, Junior and Senior	Yes	Yes	To maintain or develop aerobic resistance (swimming, cycling, career, jumping, etc.), to maintain or develop muscle strength (different muscle strengthening techniques with machines, with free weight, with body weight itself, with elastic gums, etc.), to maintain or develop speed (ability to perform sprints in the shortest possible time and repeat them the largest number of times)	Between 30 and 45 minutes	2-3 days	Yes	5 minutes	No			To talk about the game with my partners	During the initial warm-up
2021-09-18 14:36:40	Yes	28	Men	192	85	Almeria	Local, Regional, National	Local 10, Regional 5, National 1, International (without experience)	2018-2019	Senior category, Youth categories	7 or more games/week	National (autonomic)	Yes	No	To maintain or develop aerobic resistance (swimming, cycling, career, jumping, etc.), to maintain or develop muscle strength (different muscle strengthening techniques with machines, with free weight, with body weight itself, with elastic gums, etc.), to maintain or develop speed (ability to perform sprints in the shortest possible time and repeat them the largest number of times), to maintain or…	Between 15 and 30 minutes	4-5 days	Yes	10-15 minutes	No			I prefer to recover and once back on the court gradually reactivate with a bit of mobility	During the initial warm-up, During the break between halves, At the end of the game
2021-09-18 14:41:44	Yes	37	Men	173	70	Almería, Almería	Local, Regional, National	Local (18 years); Regional (13 years); National (5 years)	2018-2019	Senior category, Youth categories	Between 1 and 2 games/week	In 2018-2019, Autonomic Fab	Yes	Yes	To maintain or develop aerobic resistance (swimming, cycling, career, jumping, etc.), to maintain or develop muscle strength (different muscle strengthening techniques with machines, with free weight, with body weight itself, with elastic gums, etc.), to maintain or develop speed (ability to perform sprints in the shortest possible time and repeat them the largest number of times), to maintain or…	Between 45 and 60 minutes	2-3 days	Yes	5 minutes	No			I do not need it	During the initial warm-up
2021-09-18 15:16:10	Yes	28	Men	186	85	Zaragoza	Local, Regional, National	Local(7 years), Regional(6 years), National(1 year), International (without experience)	2020-2021	Senior category, Youth categories	7 or more games/week	Group 3 Feb	Yes	No	To maintain or develop aerobic resistance (swimming, cycling, career, jumping, etc.), to maintain or develop muscle strength (different muscle strengthening techniques with machines, with free weight, with body weight itself, with elastic gums, etc.), to maintain or develop flexibility (either with the body, help from another person, or with elements such as towels, elastic rubber, foam roller, e…	More than 60 minutes	4-5 days	No		No				During the initial warm-up
2021-09-18 15:22:15	Yes	24	Men	171	72	Huesca	Regional	5 years	2020-2021	Senior category	Between 2 and 3 games/week	Group 2	Yes	No	To maintain or develop aerobic resistance (swimming, cycling, career, jumping, etc.), to maintain or develop muscle strength (different muscle strengthening techniques with machines, with free weight, with body weight itself, with elastic gums, etc.), to maintain or develop speed (ability to perform sprints in the shortest possible time and repeat them the largest number of times), to maintain or…	More than 60 minutes	4-5 days	Yes	10 minutes	No				During the initial warm-up, During the break between halves
2021-09-18 15:35:47	Yes	27	Men	164	68	Zaragoza	Local, Regional	7 (Local) and 5 (Regional)	2018-2019	Senior category, Youth categories	Between 5 and 6 games/week	Autonomic 2-3	Yes	No	To maintain or develop aerobic resistance (swimming, cycling, career, jumping, etc.), to maintain or develop muscle strength (different muscle strengthening techniques with machines, with free weight, with body weight itself, with elastic gums, etc.), to maintain or develop flexibility (either with the body itself, help from another person, or with elements such as towels, elastic gums, foam roll…	More than 60 minutes	4-5 days	Yes	5-6 minutes	Yes	Stretches and joint mobility	Do not lose focus		During the initial warm-up, During the break between halves
2021-09-18 15:43:19	Yes	28	Men	172	75	Zaragoza	Local, Regional	Local and regional (7years)	2018-2019	Senior category, Youth categories	7 or more games/week	Until the first male national a1	Yes	Yes	To maintain or develop aerobic resistance (swimming, cycling, career, jumping, etc.), to maintain or develop muscle strength (different muscle strengthening techniques with machines, with free weight, with body weight itself, with elastic gums, etc.), to maintain or develop flexibility (either with the body, help from another person, or with elements such as towels, elastic rubber, foam roller, e…	More than 60 minutes	4-5 days	Yes	5 minutes	No	Jog or run, Running at maximum speed (sprinting), Stretches and joint mobility		I spend most of the time during the break talking with my partner about how we are handling the game and aspects to work on in the second half	During the initial warm-up
2021-09-18 15:44:44	Yes	25	Men	178	70	Zaragoza	Regional	Local (5 years) Regional (2 years)	2019-2020	Senior category	Between 5 and 6 games/week	Autonomic A2	Yes	No	To maintain or develop aerobic resistance (swimming, cycling, career, jumping, etc.)	Between 30 and 45 minutes	4-5 days	No		Yes	Running at maximum speed (sprinting), Stretches and joint mobility	Continue with the rhythm prior to the break		During the initial warm-up
2021-09-18 15:45:30	Yes	44	Men	182	88	Zaragoza	National	National 15 years	2020-2021	Senior category	Between 2 and 3 games/week	National	Yes	No	To maintain or develop aerobic resistance (swimming, cycling, career, jumped to the commons, etc.), to maintain or develop speed (ability to perform sprints in the shortest possible time and repeat them the greatest number of times), for maintain or develop flexibility (either with the body itself, help from another person, or with elements such as towels, elastic rubber, foam roller, etc.)	Between 30 and 45 minutes	2-3 days	Yes	5 minutes	Yes	Stretches and joint mobility	You have to stretch and keep your muscles warm		During the break between halves, At the end of the game
2021-09-18 15:46:57	Yes	29	Men	188	82	Zaragoza	National	National (5) Regional 5	2020-2021	Senior category	Between 3 and 4 games/week	Group 1	Yes	No	To maintain or develop aerobic resistance (swimming, cycling, career, jumping, etc.), to maintain or develop muscle strength (different muscle strengthening techniques with machines, with free weight, with body weight itself, with elastic rubber, etc.)	More than 60 minutes	4-5 days	Yes	10 minutes	No			I have not seen it convenient	During the initial warm-up
2021-09-18 15:54:39	Yes	23	Women	169	58	Zaragoza	Regional	5 years	2018-2019	Senior category	Between 5 and 6 games/week	Autonomic 3	Yes	No	To maintain or develop aerobic resistance (swimming, cycling, career, jumping, etc.), to maintain or develop muscle strength (different muscle strengthening techniques with machines, with free weight, with body weight itself, with elastic rubber, etc.)	More than 60 minutes	4-5 days	No		No			I had not considered it	During the initial warm-up
2021-09-18 16:04:01	Yes	23	Men	175	60	Córdoba	Local	3 years	2020-2021	Senior category, Youth categories	Between 2 and 3 games/week	Provincial	Yes	No	To maintain or develop muscle strength (different muscle strengthening techniques with machines, with free weight, with body weight itself, with elastic rubber, etc.)	Between 30 and 45 minutes	2-3 days	No		No				During the initial warm-up, At the end of the game
2021-09-18 16:06:06	Yes	30	Women	172	58	Córdoba	National	8 years	2020-2021	Senior category	Between 3 and 4 games/week	N1 and Provincial	Yes	Yes	To maintain or develop muscle strength (different muscle strengthening techniques with machines, with free weight, with body weight itself, with elastic rubber, etc.)	More than 60 minutes	4-5 days	Yes	10 minutes	No	Jog or run, Strength exercise (jumps, push-ups, etc.), Stretches and joint mobility, Coordination and balance exercises, Breath management techniques (activation/relaxation, awareness)		Lack of time	During the initial warm-up, At the end of the game
2021-09-18 16:06:11	Yes	26	Men	180	75	Granada	Local, Regional	Local (6), regional (1)	2020-2021	Senior category, Youth categories	7 or more games/week	Local	Yes	No	To maintain or develop aerobic resistance (swimming, cycling, career, jumping, etc.), to maintain or develop muscle strength (different muscle strengthening techniques with machines, with free weight, with body weight itself, with elastic gums, etc.), to maintain or develop speed (ability to perform sprints in the shortest possible time and repeat them the largest number of times)	Between 45 and 60 minutes	4-5 days	No		No			I stay active	During the initial warm-up, At the end of the game	I have no habit
2021-09-18 16:06:57	Yes	37	Men	173	85	Sevill	Local, Regional	Local 2, Regional 12	2018-2019	Senior category	1 game/week	National	Yes	No	To maintain or develop aerobic resistance (swimming, cycling, career, jumping, etc.)	Between 45 and 60 minutes	2-3 days	Yes	8 minutes	No			The break lasts 10 min and there is no time	Never
2021-09-18 16:08:05	Yes	35	Men	176	77	Córdoba	Regional	Regional 10 years	2020-2021	Senior category	Between 1 and 2 games/week	1 CAN NAC	Yes	No	To maintain or develop aerobic resistance (swimming, cycling, career, jumping, etc.), to maintain or develop muscle strength (different muscle strengthening techniques with machines, with free weight, with body weight itself, with elastic rubber, etc.)	More than 60 minutes	6-7 days	Yes	7 minutes	No				At the end of the game
2021-09-18 16:11:24	Yes	31	Men	184	75	Sevilla	National	Local 7 National 3	2019-2020	Senior category, Youth categories	Between 4 and 5 games/week	National	Yes	No	To maintain or develop aerobic resistance (swimming, cycling, career, jumping, etc.), to maintain or develop muscle strength (different muscle strengthening techniques with machines, with free weight, with body weight itself, with elastic gums, etc.), to maintain or develop flexibility (either with the body itself, help from another person, or with elements such as towels, elastic gums, foam roll…	More than 60 minutes	4-5 days	Yes	10 minutes	No			Little time. And I prefer to use the time to chat with the partner	During the break between halves, At the end of the game
2021-09-18 16:57:57	Yes	28	Women	152	50	Zaragoza	Regional	5 years	2018-2019	Senior category, Youth categories	7 or more games/week	Provincial 1 and Autonomic 4	Yes	No	To maintain or develop aerobic resistance (swimming, cycling, career, jumping, etc.), to maintain or develop muscle strength (different muscle strengthening techniques with machines, with free weight, with body weight itself, with elastic rubber, etc.)	Between 30 and 45 minutes	2-3 days	No		No			Because I use it to talk about the game situation.	During the initial warm-up, At the end of the game
2021-09-18 16:59:46	Yes	36	Men	180	79	Zaragoza	International	Local 17 years Regional 16 years National 12 years International 3 years	2019-2020	Senior category	1 game/week	ACB	Yes	No	To maintain or develop aerobic resistance (swimming, cycling, career, jumping, etc.), to maintain or develop muscle strength (different muscle strengthening techniques with machines, with free weight, with body weight itself, with elastic rubber, etc.)	More than 60 minutes	2-3 days	Yes	5-8 minutes	Yes	Stretches and joint mobility, Other	Muscle recovery and activation		During the initial warm-up, During the break between halves
2021-09-18 17:20:09	Yes	51	Men	180	90	MARACENA GRANADA	Local, Regional, National	Local 30 years. REGIONAL 20 years. National 7 years	2020-2021	Senior category	Between 2 and 3 games/week	National, provincial	Yes	No	To maintain or develop aerobic resistance (swimming, cycling, career, jumping, etc.)	Between 15 and 30 minutes	2-3 days	Yes	15 minutes	No			I have not needed it	During the initial warm-up, At the end of the game	It would be good to do it at the end of the game, but with the hurry I do not usually do it
2021-09-18 17:32:44	Yes	26	Men	190	80	Chiclana de la Frontera, Cádiz	Regional	8 years	2018-2019	Senior category	Between 1 and 2 games/week	Andalusian First National	Yes	No	To maintain or develop muscle strength (different muscle strengthening techniques with machines, with free weight, with body weight itself, with elastic rubber, etc.)	More than 60 minutes	2-3 days	No		No			Use that time to rest and relax your mind.	Never	To prepare the body for the game, and to return to rest
2021-09-18 17:40:32	Yes	26	Men	181	82	Zaragoza	Regional	7 years	2018-2019	Senior category	Between 6 and 7 games/week	National male, national female, 1st and 2nd male/female aragonese, cto aragon jr male/female, social gold/bronze, schoolchildren	Yes	No	To maintain or develop aerobic resistance (swimming, cycling, career, jumping, etc.), to maintain or develop muscle strength (different muscle strengthening techniques with machines, with free weight, with body weight itself, with elastic gums, etc.), to maintain or develop speed (ability to perform sprints in the shortest possible time and repeat them the largest number of times)	More than 60 minutes	4-5 days	No		No			Lack of time/ tiredness	During the initial warm-up, At the end of the game
2021-09-18 18:23:20	Yes	33	Men	187	84	Zaragoza	Local, Regional	Local 3 years, Regional 6 years	2018-2019	Senior category, Youth categories	Between 4 and 5 games/week	A3, A2, A1, School	Yes	No	To maintain or develop aerobic resistance (swimming, cycling, career, jumping, etc.), to maintain or develop muscle strength (different muscle strengthening techniques with machines, with free weight, with body weight itself, with elastic gums, etc.), to maintain or develop other capacities (coordination, balance, agility)	More than 60 minutes	4-5 days	Yes	5-10 minutes	No			I have not felt the need, at least so far	During the initial warm-up, At the end of the game		I hope you get a p 10
2021-09-18 18:35:26	Yes	45	Men	178	88	Córdoba	Regional	Local 21, Regional 17	2018-2019	Senior category, Youth categories	Between 2 and 3 games/week	Autonomical	Yes	No	To maintain or develop aerobic resistance (swimming, cycling, career, jumping, etc.), to maintain or develop muscle strength (different muscle strengthening techniques with machines, with free weight, with body weight itself, with elastic rubber, etc.)	Between 45 and 60 minutes	2-3 days	Yes	10 minutes	No				During the initial warm-up
2021-09-18 19:49:10	Yes	27	Men	171	85	Plasencia, Caceres	Local, Regional	Local (2) regional (1)	2020-2021	Senior category, Youth categories	Between 3 and 4 games/week	Infant, Cadet, Junior, Senior	Yes	No	To maintain or develop aerobic resistance (swimming, cycling, career, jumping, etc.)	Between 30 and 45 minutes	2-3 days	No	4-5 minutes	No			Rest and talk with the partner about the game	During the initial warm-up
2021-09-18 19:49:31	Yes	20	Men	172	75	Cáceres	Regional	Local 1 year Regional 4 years	2020-2021	Senior category, Youth categories	Between 5 and 6 games/week	None	Yes	No	To maintain or develop aerobic resistance (swimming, cycling, career, jumping, etc.)	Between 15 and 30 minutes	2-3 days	Yes	5 minutes	No			I prefer to rest	During the initial warm-up	It doesn't help me to activate
2021-09-18 19:49:55	Yes	32	Men	190	83	Plasencia, Cáceres	National	Local (5), regional (4), National (1)	2019-2020	Senior category	Between 2 and 3 games/week	FEXB Group 3 (National 1st)	Yes	No	To maintain or develop aerobic resistance (swimming, cycling, career, jumping, etc.), to maintain or develop muscle strength (different muscle strengthening techniques with machines, with free weight, with body weight itself, with elastic rubber, etc.)	Between 45 and 60 minutes	6-7 days	Yes	6 minutes	No			Lack of available time	Never
2021-09-18 19:50:08	Yes	29	Men	185	87	Cáceres	Local, Regional, National	7 y	2019-2020	Senior category	Between 3 and 4 games/week	WBBL	Yes	No	To maintain or develop aerobic resistance (swimming, cycling, career, jumping, etc.), to maintain or develop muscle strength (different muscle strengthening techniques with machines, with free weight, with body weight itself, with elastic rubber, etc.)	More than 60 minutes	6-7 days	Yes	5-10 minutes	No			I have never felt the need for it.	During the initial warm-up, At the end of the game	Think that they don't give me any benefitg, and I do not have a routine to implement them
2021-09-18 19:50:09	Yes	27	Men	176	63	CÁCERES	Local, Regional	Local and regional 3 years	2018-2019	Senior category, Youth categories	Between 4 and 5 games/week	Group 4	Yes	No	To maintain or develop aerobic resistance (swimming, cycling, career, jumping, etc.), to maintain or develop muscle strength (different muscle strengthening techniques with machines, with free weight, with body weight itself, with elastic rubber, etc.)	More than 60 minutes	4-5 days	No		No			Believing I don't need to physically reactivate myself, having never done it.	Never
2021-09-18 19:50:25	Yes	43	Women	155	58	Mérida	Regional	25 years	2018-2019	Senior category, Youth categories	Between 6 and 7 games/week	Group 4	Yes	No	To maintain or develop aerobic resistance (swimming, cycling, career, jumped to the Comba, etc.), to maintain or develop other capacities (coordination, balance, agility)	More than 60 minutes	4-5 days	Yes	25 minutes	No			I guess lack of routine	During the initial warm-up, At the end of the game
2021-09-18 19:50:50	Yes	29	Men	175	90	Don Benito (BADAJOZ)	Regional	2 years	2019-2020	Senior category, Youth categories	Between 2 and 3 games/week	Group 4 FEXB	Yes	Yes	To maintain or develop aerobic resistance (swimming, cycling, career, jumping, etc.), to maintain or develop muscle strength (different muscle strengthening techniques with machines, with free weight, with body weight itself, with elastic rubber, etc.)	Between 45 and 60 minutes	6-7 days	No		No			I don't usually cool during breaks	At the end of the game
2021-09-18 19:50:50	Yes	33	Women	160	48	Villanueva de la Serena	Local, Regional	Local (3 years), Regional (1 year), National and International (without experience).	2018-2019	Senior category, Youth categories	Between 3 and 4 games/week	FEXB	No					No		No			I had never thought about it.	During the initial warm-up, At the end of the game
2021-09-18 19:50:59	Yes	34	Men	181	74	Cáceres	Regional	Local (9 years), Regional (2 years)	2020-2021	Senior category	Between 4 and 5 games/week	Local and autonomic	Yes	No	To maintain or develop aerobic resistance (swimming, cycling, career, jumping, etc.), to maintain or develop muscle strength (different muscle strengthening techniques with machines, with free weight, with body weight itself, with elastic gums, etc.), to maintain or develop speed (ability to perform sprints in the shortest possible time and repeat them the largest number of times), to maintain or…	More than 60 minutes	4-5 days	Yes	5 minutes	No	Jog or run, Running at maximum speed (sprinting), Stretches and joint mobility			During the initial warm-up
2021-09-18 19:51:03	Yes	27	Men	172	77	Badajoz, Badajoz	Local, Regional	All 4 years	2019-2020	Senior category, Youth categories	Between 4 and 5 games/week	Group 2 Fexb	Yes	No	To maintain or develop aerobic resistance (swimming, cycling, career, jumping, etc.), to maintain or develop muscle strength (different muscle strengthening techniques with machines, with free weight, with body weight itself, with elastic rubber, etc.)	Between 45 and 60 minutes	4-5 days	Yes	10 minutes	No			It is not something I have ever thought about	During the initial warm-up
2021-09-18 19:51:04	Yes	23	Men	185	93.5	Badajoz	Local, Regional	Local 3 years, Regional 1 year	2019-2020	Youth categories	Between 3 and 4 games/week	Judoex	Yes	Yes	To maintain or develop aerobic resistance (swimming, cycling, career, jumping, etc.), to maintain or develop muscle strength (different muscle strengthening techniques with machines, with free weight, with body weight itself, with elastic rubber, etc.)	Between 45 and 60 minutes	2-3 days	Yes	10-15 minutes	Yes	Stretches and joint mobility	Avoid injuries		During the initial warm-up, During the break between halves, At the end of the game
2021-09-18 19:51:08	Yes	40	Women	169	65	Plasencia Cáceres	National	17 years	2018-2019	Senior category, Youth categories	Between 3 and 4 games/week	Group 2 2006-2010	Yes	No	To maintain or develop muscle strength (different muscle strengthening techniques with machines, with free weight, with body weight itself, with elastic rubber, etc.), to maintain or develop flexibility (either with the body itself, help from Another person, or with elements such as towels, elastic gums, foam roller, etc.), to maintain or develop other capacities (coordination, balance, agility)	Between 30 and 45 minutes	2-3 days	Yes	15 minutes	Yes	Stretches and joint mobility, Breath management techniques (activation/relaxation, awareness), Other	Mental activation		During the initial warm-up, During the break between halves, At the end of the game		Good job
2021-09-18 19:51:20	Yes	24	Men	177	70	Zaragoza	Regional	4 y	2019-2020	Senior category, Youth categories	7 or more games/week	To national male	No	No	To maintain or develop aerobic resistance (swimming, cycling, career, jumping, etc.)	Between 15 and 30 minutes	1 day	Yes	5-10 minutes	No	Jog or run, Running at maximum speed (sprinting), Stretches and joint mobility, Breath management techniques (activation/relaxation, awareness)		Short breaks, it is preferable to discuss technical aspects of the match with your partners.	During the initial warm-up
2021-09-18 19:51:32	Yes	29	Men	179	65	Badajoz	Regional	Regional (5 years)	2020-2021	Senior category, Youth categories	Between 4 and 5 games/week	Diputación de Badajoz (senior) and lower categories	Yes	Yes	To maintain or develop aerobic resistance (swimming, cycling, career, jumping, etc.), to maintain or develop muscle strength (different muscle strengthening techniques with machines, with free weight, with body weight itself, with elastic gums, etc.), to maintain or develop speed (ability to perform sprints in the shortest possible time and repeat them the largest number of times), to maintain or…	More than 60 minutes	4-5 days	Yes	5-10 minutes	No			For no reason	During the initial warm-up	Game settings
2021-09-18 19:51:36	Yes	37	Men	172	72	Badajoz	Local, Regional	Local (2 years), Regional (3 years)	2020-2021	Youth categories	Between 5 and 6 games/week	Judoex, Diputación Badajoz	Yes	No	To maintain or develop aerobic resistance (swimming, cycling, career, jumping, etc.), to maintain or develop muscle strength (different muscle strengthening techniques with machines, with free weight, with body weight itself, with elastic gums, etc.), to maintain or develop speed (ability to perform sprints in the shortest possible time and repeat them the largest number of times)	Between 30 and 45 minutes	2-3 days	Yes	15 minutes	No			Chat	Never
2021-09-18 19:51:37	Yes	20	Men	187	72	Plasencia	Regional	2 y	2020-2021	Senior category, Youth categories	Between 3 and 4 games/week	4	Yes	No	To maintain or develop aerobic resistance (swimming, cycling, career, jumping, etc.), to maintain or develop muscle strength (different muscle strengthening techniques with machines, with free weight, with body weight itself, with elastic rubber, etc.)	Between 15 and 30 minutes	2-3 days	No		Yes	Stretches and joint mobility	Do not get injured		During the initial warm-up, During the break between halves
2021-09-18 19:52:06	Yes	23	Women	158	44.7	Cáceres	Regional	Local (4 years), Regional (2 years), National (without experience), International (without experience)	2020-2021	Senior category, Youth categories	Between 5 and 6 games/week	Autonomous	Yes	Yes	To maintain or develop aerobic resistance (swimming, cycling, career, jumping, etc.), to maintain or develop muscle strength (different muscle strengthening techniques with machines, with free weight, with body weight itself, with elastic gums, etc.), to maintain or develop speed (ability to perform sprints in the shortest possible time and repeat them the largest number of times), to maintain or…	Between 45 and 60 minutes	2-3 days	Yes	3-5 minutes	No			To rest longer	During the initial warm-up, At the break between the first and second quarters, During the break between halves, At the break between the third and last quarter, At the end of the game
2021-09-18 19:52:13	Yes	51	Men	173	73	Cáceres, Cáceres	Regional	12 years	2019-2020	Senior category, Youth categories	Between 3 and 4 games/week	Group 3	Yes	No	To maintain or develop aerobic resistance (swimming, cycling, career, jumping, etc.)	Between 45 and 60 minutes	2-3 days	Yes	5-10 minutes	Yes	Stretches and joint mobility	Keep active		During the break between halves, At the end of the game
2021-09-18 19:52:21	Yes	33	Men	180	75	Villafranca de los Barros, Badajoz	Regional	7 years	2018-2019	Senior category, Youth categories	Between 5 and 6 games/week	Autonomous	No	No		Between 15 and 30 minutes	2-3 days	No		No			Missing routine	During the initial warm-up, At the end of the game
2021-09-18 19:52:25	Yes	30	Men	196	112	Mérida (Badajoz)	Local, Regional	Local and regional 8 years	2018-2019	Senior category, Youth categories	Between 6 and 7 games/week	Group 4	Yes	No	To maintain or develop aerobic resistance (swimming, cycling, career, jumping, etc.), to maintain or develop muscle strength (different muscle strengthening techniques with machines, with free weight, with body weight itself, with elastic gums, etc.), to maintain or develop speed (ability to perform sprints in the shortest possible time and repeat them the largest number of times), to maintain or…	Between 30 and 45 minutes	2-3 days	Yes	5-10 minutes	No			Because I had not considered it that way, ignorance or rest.	During the initial warm-up, At the end of the game
2021-09-18 19:52:31	Yes	47	Women	167	57	Cáceres	Local	Local 2 years	2020-2021	Senior category	Between 5 and 6 games/week	Autonomic	Yes	Yes	To maintain or develop aerobic resistance (swimming, cycling, career, jumping, etc.), to maintain or develop muscle strength (different muscle strengthening techniques with machines, with free weight, with body weight itself, with elastic gums, etc.), to maintain or develop speed (ability to perform sprints in the shortest possible time and repeat them the largest number of times)	More than 60 minutes	2-3 days	Yes	3-5 minutes	No			I have never thought about it	At the end of the game
2021-09-18 19:53:00	Yes	33	Men	177	81	Navalmoral de la Mata (Cáceres)	Regional	12 y	2019-2020	Senior category	Between 4 and 5 games/week	Group 3	Yes	No	To maintain or develop other capacities (coordination, balance, agility)	Between 30 and 45 minutes	4-5 days	Yes	15 minutes	No	Running at maximum speed (sprinting)			During the initial warm-up
2021-09-18 19:53:29	Yes	28	Men	171	93	Don Benito, Badajoz	Regional	Local (8 years) Regional (8 years) National (without experience), International (without experience)	2018-2019	Senior category, Youth categories	Between 3 and 4 games/week	Group 4	Yes	No	To maintain or develop aerobic resistance (swimming, cycling, career, jumped to the Comba, etc.), to maintain or develop other capacities (coordination, balance, agility)	Between 45 and 60 minutes	4-5 days	Yes	5-10 minutes	No			Laziness	During the initial warm-up
2021-09-18 19:53:31	Yes	23	Men	195	95.5	Provincia Badajoz	Regional	Local (5 years) Regional (3 years) National e International (without experience)	2018-2019	Senior category, Youth categories	Between 3 and 4 games/week	Group 3	Yes	No	To maintain or develop aerobic resistance (swimming, cycling, career, jumping, etc.), to maintain or develop muscle strength (different muscle strengthening techniques with machines, with free weight, with body weight itself, with elastic gums, etc.), to maintain or develop speed (ability to perform sprints in the shortest possible time and repeat them the largest number of times)	Between 45 and 60 minutes	2-3 days	Yes	15 minutes	No			Rest and control that everything is in order	During the initial warm-up, At the end of the game
2021-09-18 19:53:43	Yes	27	Men	176	80	Almendralejo,Badajoz	Regional	Regional (11 years)	2018-2019	Senior category, Youth categories	Between 3 and 4 games/week	Autonomics	No	No	To maintain or develop muscle strength (different muscle strengthening techniques with machines, with free weight, with body weight itself, with elastic rubber, etc.)	Between 45 and 60 minutes	2-3 days	No		No			Stay in the locker room during the break	During the initial warm-up
2021-09-18 19:55:34	Yes	31	Men	181	82	Oliva de la Frontera	Local, Regional	Local(15years) Regional (15 years)	2019-2020	Senior category, Youth categories	Between 3 and 4 games/week	Deputation	Yes	No	To maintain or develop aerobic resistance (swimming, cycling, career, jumping, etc.), to maintain or develop muscle strength (different muscle strengthening techniques with machines, with free weight, with body weight itself, with elastic rubber, etc.)	Between 45 and 60 minutes	4-5 days	No		No			Thought of not needing to warm up	During the initial warm-up
2021-09-18 19:55:39	Yes	42	Men	176	75	Badajoz	Regional	22 years	2020-2021	Senior category, Youth categories	Between 4 and 5 games/week	1st autonomic	Yes	No	To maintain or develop aerobic resistance (swimming, cycling, career, jumping, etc.), to maintain or develop muscle strength (different muscle strengthening techniques with machines, with free weight, with body weight itself, with elastic gums, etc.), to maintain or develop flexibility (either with the body, help from another person, or with elements such as towels, elastic rubber, foam roller, e…	Between 45 and 60 minutes	6-7 days	Yes	10 minutes	No	Jog or run, Running at maximum speed (sprinting), Stretches and joint mobility		Lack of time	During the initial warm-up, At the end of the game
2021-09-18 19:55:53	Yes	21	Men	180	64	Don Benito, Badajoz	Local	Local (4 years), Regional (without experience), National (without experience), International (without experience)	2020-2021	Youth categories	Between 2 and 3 games/week	Group 4	Yes	No	To maintain or develop aerobic resistance (swimming, cycling, career, jumped to the Comba, etc.), to maintain or develop other capacities (coordination, balance, agility)	Between 45 and 60 minutes	2-3 days	No		No		To be ready after the break		During the initial warm-up
2021-09-18 19:57:29	Yes	46	Men	190	86	huelva	Regional, National	Local (25) regional (20) National (6)	2019-2020	Senior category, Youth categories	Between 2 and 3 games/week	Provincial and Regional Local	Yes	No	To maintain or develop aerobic resistance (swimming, cycling, career, jumping, etc.), to maintain or develop muscle strength (different muscle strengthening techniques with machines, with free weight, with body weight itself, with elastic gums, etc.), to maintain or develop flexibility (either with the body, help from another person, or with elements such as towels, elastic rubber, foam roller, e…	Between 45 and 60 minutes	4-5 days	Yes	10 minutes	No			I don't see it necessary	During the initial warm-up, At the end of the game
2021-09-18 19:57:40	Yes	35	Men	178	87	Oliva de la Frontera	Local, Regional	Local-Regional (15 years)	2018-2019	Youth categories	Between 3 and 4 games/week	Group 4	Yes	No	To maintain or develop aerobic resistance (swimming, cycling, career, jumping, etc.)	Between 30 and 45 minutes	4-5 days	Yes	5 minutes	No	Jog or run, Strength exercise (jumps, push-ups, etc.), Stretches and joint mobility		I didn't believe it necessary	During the initial warm-up
2021-09-18 19:58:05	Yes	31	Men	178	74	Badajoz	Local, Regional, National	Local (5 years) regional (4 years) National(1 year)	2019-2020	Senior category	Between 6 and 7 games/week	First Fexb	Yes	No	To maintain or develop aerobic resistance (swimming, cycling, career, jumping, etc.), to maintain or develop muscle strength (different muscle strengthening techniques with machines, with free weight, with body weight itself, with elastic gums, etc.), to maintain or develop speed (ability to perform sprints in the shortest possible time and repeat them the largest number of times), to maintain or…	Between 45 and 60 minutes	4-5 days	Yes	10 minutes	No			Do not be excessively loaded or tired	During the initial warm-up, At the end of the game
2021-09-18 20:08:12	Yes	52	Men	180	84	ALMERIA	Local, Regional, National	Local9REGIONAL13 National 10	2020-2021	Senior category	Between 1 and 2 games/week	Provincial	Yes	No	To maintain or develop aerobic resistance (swimming, cycling, career, jumping, etc.)	Between 45 and 60 minutes	2-3 days	Yes	5 minutes	No			For lack of time and habit	During the initial warm-up
2021-09-18 20:46:57	Yes	27	Men	188	90	Jerez de la frontera, Cádiz	Local, Regional	Local 6 years	2020-2021	Senior category, Youth categories	Between 4 and 5 games/week	Provincial	Yes	No	To maintain or develop aerobic resistance (swimming, cycling, career, jumping, etc.), to maintain or develop muscle strength (different muscle strengthening techniques with machines, with free weight, with body weight itself, with elastic gums, etc.), to maintain or develop speed (ability to perform sprints in the shortest possible time and repeat them the largest number of times), to maintain or…	More than 60 minutes	4-5 days	Yes	5 minutes	No			I talk to colleagues	During the initial warm-up
2021-09-19 23:52:10	Yes	31	Women	170	69	Madrid, Madrid	National	1 Local, 6 Regional, 3 National	2019-2020	Senior category, Youth categories	7 or more games/week	National, Autonomous and Municipal League	Yes	Yes	To maintain or develop aerobic resistance (swimming, cycling, career, jumping, etc.), to maintain or develop muscle strength (different muscle strengthening techniques with machines, with free weight, with body weight itself, with elastic rubber, etc.)	Between 45 and 60 minutes	4-5 days	Yes	10 minutes	No				During the initial warm-up, During the break between halves, At the end of the game	I perform joint mobility but never typical stretching
2021-09-22 17:07:38	Yes	30	Men	178	72	Valencia	Local, Regional, National	2 years locals, 1 year Regional, 7 years National	2019-2020	Senior category	1 game/week	In the Valencian Community it is distributed differently. In my case it would be, 1 year school, 1 zonal year, 1 autonomic year, 1 national year, 1 year group 2, 2 years Group 1 and, until the year indicated, 1 year ACB.	Yes	Yes	To maintain or develop muscle strength (different muscle strengthening techniques with machines, with free weight, with body weight itself, with elastic rubber, etc.), to maintain or develop flexibility (either with the body itself, help from Another person, or with elements such as towels, elastic gums, foam roller, etc.), to maintain or develop other capacities (coordination, balance, agility)	Between 45 and 60 minutes	4-5 days	Yes	5 minutes on court	Yes	Jog or run	To activate my body as soon as possible, but progressively		During the initial warm-up, During the break between halves
2021-09-22 17:15:26	Yes	27	Men	183	84	Murcia	Local, Regional, National	Local (9 years) Regional (9 years) National (6 years)	2018-2019	Senior category	Between 1 and 2 games/week	LEB GOLD, Women's League 1 and LEB Silver	Yes	Yes	To maintain or develop aerobic resistance (swimming, cycling, career, jumping, etc.), to maintain or develop muscle strength (different muscle strengthening techniques with machines, with free weight, with body weight itself, with elastic rubber, etc.)	More than 60 minutes	4-5 days	Yes	5-10 minutes	No			I don't think it is necessary	During the initial warm-up
2021-09-22 17:17:44	Yes	30	Men	187	80	Valencia	National	Local 6 years, National 2 years	2020-2021	Senior category	Between 5 and 6 games/week	FEB Group 2	Yes	Yes	To maintain or develop muscle strength (different muscle strengthening techniques with machines, with free weight, with body weight itself, with elastic rubber, etc.), to maintain or develop speed (ability to perform sprints in the shortest possible time possible and repeat them the greatest number of times)	More than 60 minutes	4-5 days	Yes	10-12 minutes	No			I don't have it for habit	During the initial warm-up, At the end of the game
2021-09-22 17:20:22	Yes	32	Men	172	70	Alicante	Local, Regional, National	Local (11years) Regional(9years) National (6years)	2019-2020	Senior category	Between 1 and 2 games/week	Group 1	Yes	Yes	To maintain or develop muscle strength (different muscle strengthening techniques with machines, with free weight, with body weight itself, with elastic rubber, etc.), to maintain or develop speed (ability to perform sprints in the shortest possible time possible and repeat them the greatest number of times)	Between 45 and 60 minutes	4-5 days	Yes	5 minutes	Yes	Breath management techniques (activation/relaxation, awareness)	Be mental and physically active after 15 min of rest		During the initial warm-up, At the end of the game
2021-09-22 17:25:32	Yes	29	Men	177	72	Torrent, Valencia	Local, Regional	Locas (3 years), Regional (5 years)	2018-2019	Senior category, Youth categories	Between 5 and 6 games/week	Cto 1st Division Spain	Yes	No	To maintain or develop aerobic resistance (swimming, cycling, career, jumping, etc.), to maintain or develop muscle strength (different muscle strengthening techniques with machines, with free weight, with body weight itself, with elastic rubber, etc.)	More than 60 minutes	4-5 days	Yes	Between 5 and 10 minutes	No			There is not enough time to lose activation	During the initial warm-up, At the end of the game
2021-09-22 17:25:54	Yes	32	Men	183	82	Las palmas de GC	Local, Regional, National	Local (8 years) Regional (6 years) National (5 years) International(without experience)	2018-2019	Senior category, Youth categories	Between 2 and 3 games/week	Group 1 Feb, regional competitions and insular competitions in GC	Yes	No	To maintain or develop aerobic resistance (swimming, cycling, career, jumping, etc.), to maintain or develop muscle strength (different muscle strengthening techniques with machines, with free weight, with body weight itself, with elastic gums, etc.), to maintain or develop flexibility (either with the body, help from another person, or with elements such as towels, elastic rubber, foam roller, e…	Between 45 and 60 minutes	4-5 days	Yes	5-10 minutes	No			Does not pertain to my routine	During the initial warm-up
2021-09-22 17:30:52	Yes	34	Men	180	76	Alicante	National	Local 13 Regional 12 National 6	2018-2019	Senior category, Youth categories	Between 2 and 3 games/week	Group 2 Feb. EBA and LF2	Yes	No	To maintain or develop aerobic resistance (swimming, cycling, career, jumping, etc.), to maintain or develop muscle strength (different muscle strengthening techniques with machines, with free weight, with body weight itself, with elastic gums, etc.), to maintain or develop speed (ability to perform sprints in the shortest possible time and repeat them the largest number of times), to maintain or…	More than 60 minutes	4-5 days	Yes	15-20 minutes	Yes	Strength exercise (jumps, push-ups, etc.), Stretches and joint mobility	There is hardly any time, but after 8 minutes totally stopped, taking a couple of jumps or some mobility, helps me not only in the physical, also and especially in activating mentally		During the initial warm-up, During the break between halves, At the end of the game
2021-09-22 17:32:13	Yes	49	Men	180	81	Sada A Coruña	Local, Regional, National, International	Local 2, regional 4, National 22, International 10	2018-2019	Senior category	Between 1 and 2 games/week	ACB, Euroleague, Eurocup	Yes	No	To maintain or develop aerobic resistance (swimming, cycling, career, jumping, etc.), to maintain or develop muscle strength (different muscle strengthening techniques with machines, with free weight, with body weight itself, with elastic gums, etc.), to maintain or develop flexibility (either with the body, help from another person, or with elements such as towels, elastic rubber, foam roller, e…	More than 60 minutes	4-5 days	Yes	About 5 minutes	No			I don't usually do it out of habit. I use it more for rest than activation	During the initial warm-up
2021-09-22 17:33:26	Yes	34	Women	168	61	Borrassa, Girona	Local, Regional, National, International	Local (17 years) regional (10 years) National (7 years) International (2 years)	2018-2019	Senior category, Youth categories	Between 2 and 3 games/week	FEB Group 1	Yes	No	To maintain or develop aerobic resistance (swimming, cycling, career, jumping, etc.), to maintain or develop muscle strength (different muscle strengthening techniques with machines, with free weight, with body weight itself, with elastic gums, etc.), to maintain or develop speed (ability to perform sprints in the shortest possible time and repeat them the largest number of times), to maintain or…	More than 60 minutes	6-7 days	Yes	More than 10 minutes	Yes	Jog or run, Breath management techniques (activation/relaxation, awareness), Other	To return to the game with the state of optimal activation, and thus not lose effectiveness in my decisions in the third quarter		During the initial warm-up, At the end of the game		Thank you for paying attention to the physical conditioning of the referees.
2021-09-22 17:40:12	Yes	28	Men	172	70	Ondara, Alicante	National	Local 11 years, Regional (11 years), National (2 years),International (without experience)	2020-2021	Senior category	Between 4 and 5 games/week	FEB Group 2, 1 National Division, lower categories	Yes	No	To maintain or develop aerobic resistance (swimming, cycling, career, jumping, etc.), to maintain or develop muscle strength (different muscle strengthening techniques with machines, with free weight, with body weight itself, with elastic gums, etc.), to maintain or develop speed (ability to perform sprints in the shortest possible time and repeat them the largest number of times)	More than 60 minutes	4-5 days	Yes	10 minutes	No	Jog or run, Running at maximum speed (sprinting), Stretches and joint mobility, Coordination and balance exercises			During the initial warm-up, During the break between halves
2021-09-22 17:41:46	Yes	37	Men	181	77	Madrid	International	International 3, National 9	2020-2021	Senior category	1 game/week	ACB FIBA	Yes	No	To maintain or develop muscle strength (different muscle strengthening techniques with machines, with free weight, with body weight itself, with elastic rubber, etc.)	Between 45 and 60 minutes	2-3 days	No		No			I do it, but without routine	At the end of the game
2021-09-22 17:46:37	Yes	40	Women	167	60.5	Salamanca	Regional, National, International	Regional (20 years) National (15 years) International (4 years)	2019-2020	Senior category	Between 1 and 2 games/week	ACB, international, regional	Yes	Yes	To maintain or develop aerobic resistance (swimming, cycling, career, jumping, etc.), to maintain or develop muscle strength (different muscle strengthening techniques with machines, with free weight, with body weight itself, with elastic gums, etc.), to maintain or develop speed (ability to perform sprints in the shortest possible time and repeat them the largest number of times), to maintain or…	More than 60 minutes	4-5 days	Yes	10 minutes	No			We entertain ourselves with the game and what is happening	At the end of the game
2021-09-22 17:52:58	Yes	34	Men	175	70	Moncada, Valencia	Local, Regional, National	Local (12 years) regional (11 years) National (9 years)	2020-2021	Senior category	1 game/week	Group 1	Yes	No	To maintain or develop aerobic resistance (swimming, cycling, career, jumping, etc.), to maintain or develop muscle strength (different muscle strengthening techniques with machines, with free weight, with body weight itself, with elastic gums, etc.), to maintain or develop other capacities (coordination, balance, agility)	Between 45 and 60 minutes	2-3 days	Yes	10 minutes	Yes	Stretches and joint mobility			During the initial warm-up, During the break between halves, At the end of the game	-
2021-09-22 17:58:20	Yes	36	Men	178	72	Barcelona, Barcelona	Local, Regional, National	Local (1), Regional (5), National (13), International (without experience)	2020-2021	Senior category	1 game/week	ACB	Yes	Yes	To maintain or develop aerobic resistance (swimming, cycling, career, jumping, etc.), to maintain or develop muscle strength (different muscle strengthening techniques with machines, with free weight, with body weight itself, with elastic gums, etc.), to maintain or develop speed (ability to perform sprints in the shortest possible time and repeat them the largest number of times), to maintain or…	Between 45 and 60 minutes	2-3 days	Yes	15 minutes	No	Jog or run, Running at maximum speed (sprinting), Strength exercise (jumps, push-ups, etc.), Stretches and joint mobility	-	Due to habit and/or timing, it is difficult to always apply 100%. Sometimes I do reactivate, but many others you arrive with little time, so it is not routine.	During the initial warm-up		Good luck with the project!
2021-09-22 18:06:57	Yes	45	Men	184	82	Denia Alicante,	Local, Regional, National, International	Local (26 years), regional (22 years), National (19 years), International (8 years)	2018-2019	Senior category	Between 1 and 2 games/week	ACB, FIBA	Yes	Yes	To maintain or develop aerobic resistance (swimming, cycling, career, jumping, etc.), to maintain or develop muscle strength (different muscle strengthening techniques with machines, with free weight, with body weight itself, with elastic gums, etc.), to maintain or develop speed (ability to perform sprints in the shortest possible time and repeat them the largest number of times), to maintain or…	More than 60 minutes	4-5 days	Yes	12 minutes	No			Due to bad habit	During the initial warm-up, At the end of the game
2021-09-22 18:08:20	Yes	40	Men	184	88	Madrid	National	Local 6 - Regional 5 - National 9	2018-2019	Senior category	1 game/week	Endesa League	Yes	Yes	To maintain or develop aerobic resistance (swimming, cycling, career, jumping, etc.), to maintain or develop muscle strength (different muscle strengthening techniques with machines, with free weight, with body weight itself, with elastic gums, etc.), to maintain or develop flexibility (either with the body, help from another person, or with elements such as towels, elastic rubber, foam roller, e…	Between 45 and 60 minutes	2-3 days	Yes	2 minutes	No				During the initial warm-up
2021-09-22 18:21:59	Yes	31	Men	180	72	Madrid	National	Local (1 year) Regional (4 years) National (7 years)	2019-2020	Senior category	1 game/week	ACB	Yes	No	To maintain or develop aerobic resistance (swimming, cycling, career, jumping, etc.), to maintain or develop muscle strength (different muscle strengthening techniques with machines, with free weight, with body weight itself, with elastic gums, etc.), to maintain or develop other capacities (coordination, balance, agility)	Between 45 and 60 minutes	4-5 days	Yes	5-10 minutes	Yes	Stretches and joint mobility	For a physical and psychological reason before resuming the game		During the initial warm-up, During the break between halves, At the end of the game
2021-09-22 18:28:22	Yes	55	Men	186	81	León	National, International	National(30 years) International (18years)	2019-2020	Senior category	1 game/week	ACB	Yes	No	To maintain or develop aerobic resistance (swimming, cycling, career, jumping, etc.), to maintain or develop muscle strength (different muscle strengthening techniques with machines, with free weight, with body weight itself, with elastic gums, etc.), to maintain or develop speed (ability to perform sprints in the shortest possible time and repeat them the largest number of times)	Between 45 and 60 minutes	2-3 days	Yes	10-15 minutes	Yes	Jog or run, Stretches and joint mobility	MAKE MUSCULAR TONE		During the initial warm-up, At the break between the first and second quarters, At the end of the game
2021-09-22 18:40:52	Yes	33	Men	185	83	Zaragoza	Local, Regional, National	Local (12 years) REGIONAL (10 years) National (6 years)	2019-2020	Senior category	1 game/week	ACB	Yes	No	To maintain or develop aerobic resistance (swimming, cycling, career, jumping, etc.), to maintain or develop muscle strength (different muscle strengthening techniques with machines, with free weight, with body weight itself, with elastic gums, etc.), to maintain or develop speed (ability to perform sprints in the shortest possible time and repeat them the largest number of times)	Between 30 and 45 minutes	2-3 days	No		No			I don't have a guide or a routine to perform that is beneficial for my activity.	During the initial warm-up, At the end of the game
2021-09-22 18:50:21	Yes	28	Men	185	80	Cádiz, Cádiz	Local, Regional, National, International	Local (11 years), Regional (7 years), National (6 years) e International (new license)	2019-2020	Senior category	1 game/week	ACB	Yes	No	To maintain or develop aerobic resistance (swimming, cycling, career, jumping, etc.), to maintain or develop muscle strength (different muscle strengthening techniques with machines, with free weight, with body weight itself, with elastic rubber, etc.)	Between 45 and 60 minutes	4-5 days	Yes	Between approximately 20-30 minutes. Divided in time into the locker room (activation exercises with elastic band and own body weight), and 20 minutes before the game (cardiovascular activation with runs and displacements)	No			Lack of a specific moment for activation. Normally, within 10 minutes of the locker room, we take a break and talk about the game, then they go out on the court with 5 minutes remaining, where nothing is usually done, but I am in favor of reactivating it for greater guarantees.	During the initial warm-up
2021-09-22 18:50:41	Yes	32	Men	192	82	Alcalá de Henares, Madrid	National	Local (1 years), Regional (8 years), National (6 years), International (without experience)	2019-2020	Senior category	1 game/week	Endesa League	Yes	No	To maintain or develop aerobic resistance (swimming, cycling, career, jumping, etc.), to maintain or develop muscle strength (different muscle strengthening techniques with machines, with free weight, with body weight itself, with elastic gums, etc.), to maintain or develop speed (ability to perform sprints in the shortest possible time and repeat them the largest number of times), to maintain or…	Between 45 and 60 minutes	4-5 days	Yes	5 minutes	Yes	Jog or run, Breath management techniques (activation/relaxation, awareness), Other	To not start the third quarter cold, and to be prepared for physical activity, just like players.		At the end of the game
2021-09-22 18:59:43	Yes	25	Men	163	66	Picanya (Valencia)	Local, Regional	Local (7 years) Regional (2 years)	2020-2021	Senior category, Youth categories	Between 5 and 6 games/week	National, autonomic of all categories, provincial of all categories and schools of all categories	Yes	Yes	To maintain or develop muscle strength (different muscle strengthening techniques with machines, with free weight, with body weight itself, with elastic rubber, etc.)	More than 60 minutes	4-5 days	No		No			Bad habit	At the end of the game
2021-09-22 19:12:21	Yes	29	Men	194	92	L'Hospitalet de Llobregat	National	Local (2 years), Regional (3 years), National (5 years)	2019-2020	Senior category	Between 1 and 2 games/week	Group 1 Feb	Yes	No	To maintain or develop aerobic resistance (swimming, cycling, career, jumping, etc.), to maintain or develop muscle strength (different muscle strengthening techniques with machines, with free weight, with body weight itself, with elastic rubber, etc.)	Between 45 and 60 minutes	2-3 days	Yes	5 minutes	No			Lack of habit	During the initial warm-up
2021-09-22 19:33:03	Yes	35	Men	189	95	Valencia	Local, Regional, National	Local (14 years), Regional (13 years), National (11 years)	2019-2020	Senior category, Youth categories	Between 1 and 2 games/week	Group 1	Yes	Yes	To maintain or develop aerobic resistance (swimming, cycling, career, jumping, etc.), to maintain or develop muscle strength (different muscle strengthening techniques with machines, with free weight, with body weight itself, with elastic gums, etc.), to maintain or develop flexibility (either with the body, help from another person, or with elements such as towels, elastic rubber, foam roller, e…	Between 45 and 60 minutes	2-3 days	Yes	10 minutes	Yes	Stretches and joint mobility, Breath management techniques (activation/relaxation, awareness)	15 minutes of break is a lot to stay warmed if not		During the initial warm-up, During the break between halves, At the end of the game
2021-09-22 19:33:50	Yes	43	Men	179	78	León	Local, Regional, National	Local(1), Regional(20), International (without experience)	2020-2021	Senior category	1 game/week	ACB	Yes	No	To maintain or develop aerobic resistance (swimming, cycling, career, jumping, etc.)	Between 30 and 45 minutes	4-5 days	Yes	10-15 minutes	No			Well, I have never done it and for what I am suspecting since I read the question, maybe I should…	During the initial warm-up, At the end of the game
2021-09-22 19:41:05	Yes	48	Men	180	80	San Sebastián	National	20 y	2020-2021	Senior category	1 game/week	ACB	Yes	Yes	To maintain or develop aerobic resistance (swimming, cycling, career, jumping, etc.)	Between 45 and 60 minutes	4-5 days	Yes	10 minutes	No				At the end of the game
2021-09-22 19:46:28	Yes	51	Men	180	82	Castellar del Valles Barcelona	National, International	21 years National 10 International	2020-2021	Senior category	1 game/week	ACB	Yes	No	To maintain or develop aerobic resistance (swimming, cycling, career, jumped to the commits, etc.), to maintain or develop speed (ability to perform sprints in the shortest possible time and repeat them the largest number of times)	Between 45 and 60 minutes	2-3 days	Yes	7 minutes	Yes	Stretches and joint mobility	Routine		During the initial warm-up, At the break between the first and second quarters
2021-09-22 20:57:38	Yes	43	Men	182	82	Murcia	International	6 years	2018-2019	Senior category	Between 1 and 2 games/week	2018-2019 ACB and FIBA	Yes	Yes	To maintain or develop muscle strength (different muscle strengthening techniques with machines, with free weight, with body weight itself, with elastic rubber, etc.), to maintain or develop speed (ability to perform sprints in the shortest possible time possible and to repeat them the greatest number of times), to maintain or develop flexibility (either with the body itself, help from another pe…	More than 60 minutes	2-3 days	Yes	5-10 minutes	No				During the initial warm-up
2021-09-22 20:59:00	Yes	28	Men	194	79	Madrid, Madrid	National	Local/Regional (6), National (4)	2019-2020	Senior category	Between 1 and 2 games/week	Group 1	Yes	No	To maintain or develop aerobic resistance (swimming, cycling, career, jumping, etc.), to maintain or develop muscle strength (different muscle strengthening techniques with machines, with free weight, with body weight itself, with elastic rubber, etc.)	Between 45 and 60 minutes	2-3 days	Yes	War-up 14 minutes before the game presentation. When this ends, sprints to activate	No			I usually use it to comment on aspects of improvement, or to talk with colleagues	During the initial warm-up
2021-09-22 21:53:54	Yes	48	Men	179	77	Ciudad Real	International	International 17	2019-2020	Senior category	Between 2 and 3 games/week	ACB	Yes	Yes	To maintain or develop aerobic resistance (swimming, cycling, career, jumping, etc.), to maintain or develop muscle strength (different muscle strengthening techniques with machines, with free weight, with body weight itself, with elastic gums, etc.), to maintain or develop speed (ability to perform sprints in the shortest possible time and repeat them the largest number of times), to maintain or…	Between 45 and 60 minutes	2-3 days	Yes	7-8 minutes	No			No habit	During the initial warm-up, During the break between halves, At the end of the game
2021-09-22 22:02:12	Yes	26	Men	176	80	Berriozar,Navarra	Local, Regional	Regional(2 years)	2020-2021	Youth categories	Between 3 and 4 games/week	Regional category	Yes	Yes	To maintain or develop aerobic resistance (swimming, cycling, career, jumping, etc.), to maintain or develop muscle strength (different muscle strengthening techniques with machines, with free weight, with body weight itself, with elastic gums, etc.), to maintain or develop speed (ability to perform sprints in the shortest possible time and repeat them the largest number of times), to maintain or…	More than 60 minutes	2-3 days	Yes	10 minutes	No			I understand that rest is not enough for the body to reach a state of relaxation	During the initial warm-up	For activation
2021-09-22 23:38:31	Yes	28	Men	178	73	Avilés, Asturias	Local, Regional, National	Local (3 years), Regional (1), National (8), International (without experience	2020-2021	Senior category	1 game/week	ACB	Yes	Yes	To maintain or develop aerobic resistance (swimming, cycling, career, jumping, etc.), to maintain or develop muscle strength (different muscle strengthening techniques with machines, with free weight, with body weight itself, with elastic rubber, etc.)	Between 45 and 60 minutes	2-3 days	Yes	Progressive running (jog to some sprint) 3-4 minutes + Joint Mobility 2-3 minutes	No	Stretches and joint mobility	To reactivate the body for the activity and not enter cold after a 15 -minute break		During the initial warm-up, During the break between halves
2021-09-23 06:05:23	Yes	51	Men	182	77	Las Palmas	National, International	National (26 years) International (14 years)	2019-2020	Senior category	Between 1 and 2 games/week	ACB	Yes	No	To maintain or develop aerobic resistance (swimming, cycling, career, jumping, etc.), to maintain or develop muscle strength (different muscle strengthening techniques with machines, with free weight, with body weight itself, with elastic gums, etc.), to maintain or develop speed (ability to perform sprints in the shortest possible time and repeat them the largest number of times)	More than 60 minutes	4-5 days	Yes	10-15 minutes	No			I do not see necessary, I prefer to talk about the game with the partners.	During the initial warm-up, At the end of the game
2021-09-23 10:31:11	Yes	54	Men	182	83	Bilbao	National, International	National (30 years) International (18)	2019-2020	Senior category	Between 1 and 2 games/week	ACB - Euroleague	Yes	No	To maintain or develop aerobic resistance (swimming, cycling, career, jumping, etc.), to maintain or develop muscle strength (different muscle strengthening techniques with machines, with free weight, with body weight itself, with elastic gums, etc.), to maintain or develop speed (ability to perform sprints in the shortest possible time and repeat them the largest number of times)	More than 60 minutes	2-3 days	Yes	5 minutes	No			Habits	During the initial warm-up
2021-09-23 10:37:29	Yes	47	Men	183	81	Zaragoza	National, International	21 years National y 10 years International	2019-2020	Senior category	Between 1 and 2 games/week	ACB - Euroleague - Eurocup	Yes	No	To maintain or develop aerobic resistance (swimming, cycling, career, jumping, etc.), to maintain or develop muscle strength (different muscle strengthening techniques with machines, with free weight, with body weight itself, with elastic gums, etc.), to maintain or develop other capacities (coordination, balance, agility)	Between 45 and 60 minutes	4-5 days	Yes	25-30 minutes	No			I prefer to do a "cool down" and the 5-7 minutes I have in the locker room, share feelings with my partners	During the initial warm-up, At the end of the game
2021-09-23 11:01:44	Yes	35	Men	185	93	Salamanca	National	2, 2,12, without experience	2018-2019	Senior category	Between 1 and 2 games/week	FEB, Group 1	Yes	No	To maintain or develop muscle strength (different muscle strengthening techniques with machines, with free weight, with body weight itself, with elastic rubber, etc.)	Between 45 and 60 minutes	4-5 days	Yes	10-15 minutes	No			Even knowing that it is useful, usually I use it more to rest	Never, During the initial warm-up
2021-09-23 12:09:45	Yes	39	Men	192	98	Alcalá de Henares, Madrid	Regional, National	Regional (7 years) y National (13 years)	2018-2019	Senior category	1 game/week	ACB	Yes	No	To maintain or develop aerobic resistance (swimming, cycling, career, jumping, etc.), to maintain or develop muscle strength (different muscle strengthening techniques with machines, with free weight, with body weight itself, with elastic gums, etc.), to maintain or develop flexibility (either with the body, help from another person, or with elements such as towels, elastic rubber, foam roller, e…	More than 60 minutes	2-3 days	Yes	8 minutes of cardio, 6 minutes of flexibility	No			I do not see it necessary so far	During the initial warm-up, At the end of the game		Wish the study goes well
2021-09-23 13:10:55	Yes	22	Men	176	67	Granada	Local	Local (2 years)	2020-2021	Youth categories	Between 4 and 5 games/week	Provincial	Yes	No	To maintain or develop muscle strength (different muscle strengthening techniques with machines, with free weight, with body weight itself, with elastic rubber, etc.)	More than 60 minutes	4-5 days	Yes	10 minutes	No			Rest and little time	During the initial warm-up, During the break between halves, At the end of the game	I have not perform them, or know how to excute them so as not to suffer harm
2021-09-23 13:15:37	Yes	22	Men	175	75	Caniles Granada	Local	Local 2 years	2020-2021	Youth categories	Between 3 and 4 games/week	Provincial	Yes	No	To maintain or develop aerobic resistance (swimming, cycling, career, jumping, etc.), to maintain or develop muscle strength (different muscle strengthening techniques with machines, with free weight, with body weight itself, with elastic gums, etc.), to maintain or develop speed (ability to perform sprints in the shortest possible time and repeat them the largest number of times)	Between 45 and 60 minutes	4-5 days	Yes	3 minutes	No	Jog or run, Running at maximum speed (sprinting)		I have never done it	Never
2021-09-25 12:13:36	Yes	32	Men	187	87	Huelva	Local	10 years	2019-2020	Senior category	Between 3 and 4 games/week	Provincial	Yes	No	To maintain or develop aerobic resistance (swimming, cycling, career, jumping, etc.), to maintain or develop muscle strength (different muscle strengthening techniques with machines, with free weight, with body weight itself, with elastic rubber, etc.)	More than 60 minutes	4-5 days	No		No			I don't see it necessary	During the initial warm-up
2021-09-25 12:14:47	Yes	21	Men	190	76	Huelva	Local	3 years	2020-2021	Youth categories	Between 1 and 2 games/week	Junior, Cadet, Infantil, Minibasket and Premini	Yes	No	To maintain or develop muscle strength (different muscle strengthening techniques with machines, with free weight, with body weight itself, with elastic rubber, etc.), to maintain or develop speed (ability to perform sprints in the shortest possible time possible and repeat them the greatest number of times)	More than 60 minutes	4-5 days	No		No			I don't have it in consideration	During the initial warm-up
2021-09-25 12:17:54	Yes	20	Men	175	72	Huelva	Local	Local (4 years), Regional (without experience), National (without experience), International (without experience)	2019-2020	Senior category	Between 2 and 3 games/week	Provincial	Yes	No	To maintain or develop aerobic resistance (swimming, cycling, career, jumping, etc.)	More than 60 minutes	4-5 days	Yes	5 minutes	No			I feel that I am already in the dynamics of the game and I use the break as rest.	During the initial warm-up
2021-09-25 12:18:26	Yes	25	Women	170	68	Huelva	Local, Regional	Local 5 years Regional 1	2018-2019	Senior category, Youth categories	Between 4 and 5 games/week	Provincial	Yes	Yes	To maintain or develop muscle strength (different muscle strengthening techniques with machines, with free weight, with body weight itself, with elastic rubber, etc.), to maintain or develop speed (ability to perform sprints in the shortest possible time possible and to repeat them the greatest number of times), to maintain or develop flexibility (either with the body itself, help from another pe…	Between 45 and 60 minutes	4-5 days	Yes	10-15 minutes	Yes	Stretches and joint mobility, Other	Well, mainly I perform mobility and some stretching		During the initial warm-up, During the break between halves, At the end of the game
2021-09-25 12:22:48	Yes	31	Men	190	101	Huelva	Local	Local(4 years)	2019-2020	Youth categories	Between 2 and 3 games/week	Group 2	No	No	To maintain or develop aerobic resistance (swimming, cycling, career, jumping, etc.)	Between 45 and 60 minutes	1 day	Yes	15 minutes	No			Work activity	During the initial warm-up
2021-09-25 12:23:36	Yes	27	Men	199	77	Paterna del Campo, Huelva	Local	1 y	2019-2020	Youth categories	1 game/week	Minibasket, Infant	Yes	No	To maintain or develop aerobic resistance (swimming, cycling, career, jumping, etc.), to maintain or develop muscle strength (different muscle strengthening techniques with machines, with free weight, with body weight itself, with elastic gums, etc.), to maintain or develop other capacities (coordination, balance, agility)	Between 45 and 60 minutes	6-7 days	Yes	10 minutes	No			Not necessary	During the initial warm-up
2021-09-25 12:24:07	Yes	54	Men	165	63	Huelva	Local	1 y	2020-2021	Youth categories	1 game/week	Provincial	Yes	No	To maintain or develop aerobic resistance (swimming, cycling, career, jumped to the commons, etc.), to maintain or develop speed (ability to perform sprints in the shortest possible time and repeat them the greatest number of times), for maintain or develop flexibility (either with the body itself, help from another person, or with elements such as towels, elastic rubber, foam roller, etc.)	Between 30 and 45 minutes	2-3 days	Yes	10 minutes	Yes	Jog or run, Stretches and joint mobility	Improve concentration. Physically activate		During the initial warm-up, During the break between halves, At the end of the game
2021-09-25 12:28:37	Yes	29	Women	166	63	Huelva	Local, National	Local 8 years. National 1 year	2019-2020	Senior category	Between 3 and 4 games/week	Provincial	Yes	No	To maintain or develop aerobic resistance (swimming, cycling, career, jumping, etc.), to maintain or develop muscle strength (different muscle strengthening techniques with machines, with free weight, with body weight itself, with elastic rubber, etc.)	More than 60 minutes	2-3 days	Yes	5-10minutes	No				During the initial warm-up, At the end of the game
2021-09-25 13:25:24	Yes	19	Men	181	72.1	Huelva, Huelva	Local	Local (4 years)	2020-2021	Senior category	Between 3 and 4 games/week	Provincial category (senior)	Yes	No	To maintain or develop aerobic resistance (swimming, cycling, career, jumping, etc.), to maintain or develop muscle strength (different muscle strengthening techniques with machines, with free weight, with body weight itself, with elastic gums, etc.), to maintain or develop speed (ability to perform sprints in the shortest possible time and repeat them the largest number of times), to maintain or…	More than 60 minutes	6-7 days	Yes	5 minutes approx.	Yes	Stretches and joint mobility	To avoid injuries, pulls ...		During the initial warm-up, During the break between halves, At the end of the game
2021-09-25 13:29:55	Yes	20	Men	167	53	Palos de la Frontera	Local	Local (5 years), Regional (without experience ), National (without experience), International (without experience)	2020-2021	Senior category, Youth categories	Between 2 and 3 games/week	All in the provincials.	Yes	No	To maintain or develop muscle strength (different muscle strengthening techniques with machines, with free weight, with body weight itself, with elastic rubber, etc.), to maintain or develop speed (ability to perform sprints in the shortest possible time possible and repeat them the greatest number of times)	Between 30 and 45 minutes	4-5 days	Yes	5 minutes	Yes	Breath management techniques (activation/relaxation, awareness)	Cooling		During the initial warm-up
2021-09-25 13:32:19	Yes	26	Men	175	83	Trigueros	Local	Local (9years)	2021-2022	Youth categories	Between 1 and 2 games/week	FAB, 2021-2022	Yes	No	To maintain or develop aerobic resistance (swimming, cycling, career, jumping, etc.), to maintain or develop muscle strength (different muscle strengthening techniques with machines, with free weight, with body weight itself, with elastic rubber, etc.)	More than 60 minutes	2-3 days	Yes	10 minutes	Yes	Jog or run, Stretches and joint mobility	So that a significant change does not occur		During the initial warm-up, During the break between halves
2021-09-25 15:45:40	Yes	23	Men	186	79	Jaén	Local	Local 3 years	2018-2019	Youth categories	Between 2 and 3 games/week	Provincial	Yes	No	To maintain or develop muscle strength (different muscle strengthening techniques with machines, with free weight, with body weight itself, with elastic rubber, etc.)	More than 60 minutes	4-5 days	No		No				Never
2021-09-25 15:48:52	Yes	47	Men	173	77	Andújar (Jaén)	Regional	Regional (30 years)	2019-2020	Senior category, Youth categories	Between 5 and 6 games/week	Provincial	Yes	No	To maintain or develop aerobic resistance (swimming, cycling, career, jumping, etc.), to maintain or develop muscle strength (different muscle strengthening techniques with machines, with free weight, with body weight itself, with elastic rubber, etc.)	Between 45 and 60 minutes	4-5 days	Yes	10 minutes	No			Bad habit.	During the initial warm-up, At the end of the game
2021-09-25 15:50:39	Yes	29	Women	172	67	Linares, Jaén	Local, Regional, National	Local (4 years) Regional (3 years) National (2 years)	2019-2020	Senior category	1 game/week	FEB Group 1	Yes	No	To maintain or develop aerobic resistance (swimming, cycling, career, jumping, etc.), to maintain or develop muscle strength (different muscle strengthening techniques with machines, with free weight, with body weight itself, with elastic rubber, etc.)	Between 45 and 60 minutes	4-5 days	Yes	9 minutes	No			I use the breaks to rest, I have not considered to reactivate myself during the breaks	During the initial warm-up, At the end of the game
2021-09-25 18:57:54	Yes	19	Men	177	63	Huelva	Local	Local (2 years)	2020-2021	Youth categories	1 game/week	Minibasket, Junior	Yes	No	To maintain or develop aerobic resistance (swimming, cycling, career, jumping, etc.), to maintain or develop muscle strength (different muscle strengthening techniques with machines, with free weight, with body weight itself, with elastic gums, etc.), to maintain or develop other capacities (coordination, balance, agility)	More than 60 minutes	2-3 days	No		No				During the initial warm-up
2021-09-25 20:44:06	Yes	34	Women	180	82	Huelva	Local	Local 13 years	2019-2020	Senior category, Youth categories	Between 3 and 4 games/week	Provincial	Yes	No	To maintain or develop muscle strength (different muscle strengthening techniques with machines, with free weight, with body weight itself, with elastic rubber, etc.), to maintain or develop speed (ability to perform sprints in the shortest possible time possible and to repeat them the greatest number of times), to maintain or develop flexibility (either with the body itself, help from another pe…	Between 30 and 45 minutes	2-3 days	Yes	5 minutes	Yes	Stretches and joint mobility, Coordination and balance exercises, Breath management techniques (activation/relaxation, awareness)	Concentration, resume muscle activation		During the initial warm-up, During the break between halves
2021-09-26 12:52:42	Yes	25	Men	190	86	Huelva	Local	Local (1 year)	2020-2021	Youth categories	1 game/week	Provincial categories	Yes	No	To maintain or develop aerobic resistance (swimming, cycling, career, jumping, etc.), to maintain or develop muscle strength (different muscle strengthening techniques with machines, with free weight, with body weight itself, with elastic gums, etc.), to maintain or develop speed (ability to perform sprints in the shortest possible time and repeat them the largest number of times)	More than 60 minutes	4-5 days	No		No				During the initial warm-up
2021-09-27 10:22:23	Yes	37	Men	194	96	Huelva	Local	Local (16 years)	2019-2020	Senior category	Between 2 and 3 games/week	Provincial category	Yes	No	To maintain or develop aerobic resistance (swimming, cycling, career, jumping, etc.), to maintain or develop muscle strength (different muscle strengthening techniques with machines, with free weight, with body weight itself, with elastic rubber, etc.)	More than 60 minutes	4-5 days	Yes	10-15 minutes	No	Jog or run, Stretches and joint mobility		I prefer to rest and talk about game issues	During the initial warm-up
2021-09-28 12:35:05	Yes	25	Men	185	90	Málaga	Local	Local (5 years)	2019-2020	Senior category, Youth categories	Between 4 and 5 games/week	Provincial category	Yes	No	To maintain or develop aerobic resistance (swimming, cycling, career, jumping, etc.), to maintain or develop muscle strength (different muscle strengthening techniques with machines, with free weight, with body weight itself, with elastic gums, etc.), to maintain or develop speed (ability to perform sprints in the shortest possible time and repeat them the largest number of times), to maintain or…	Between 45 and 60 minutes	4-5 days	Yes	10-15 minutes	No			The rest is short, and I feel that I am sufficiently activated to start the second half	During the initial warm-up, At the end of the game
2021-09-28 12:37:27	Yes	24	Men	187	90	Málaga	Regional	4 y	2020-2021	Senior category, Youth categories	Between 3 and 4 games/week	Provincial	Yes	No	To maintain or develop aerobic resistance (swimming, cycling, career, jumping, etc.), to maintain or develop muscle strength (different muscle strengthening techniques with machines, with free weight, with body weight itself, with elastic gums, etc.), to maintain or develop flexibility (either with the body, help from another person, or with elements such as towels, elastic rubber, foam roller, e…	More than 60 minutes	6-7 days	No		No			Talk with the colleagues on how we are handling the game.	At the end of the game
2021-09-28 12:39:49	Yes	31	Women	155	70	Málaga, Málaga	Local	Local (6 years), Regional (without experience), National (without experience), International (without experience)	2019-2020	Senior category, Youth categories	Between 6 and 7 games/week	Provincial	Yes	No	To maintain or develop aerobic resistance (swimming, cycling, career, jumping, etc.)	More than 60 minutes	1 day	No		No			I have no reason, actually.	During the initial warm-up
2021-09-28 12:44:25	Yes	25	Men	185	73	Málaga	Local	Local (3 years)	2020-2021	Youth categories	Between 5 and 6 games/week	Provincial Malaga	Yes	No	To maintain or develop muscle strength (different muscle strengthening techniques with machines, with free weight, with body weight itself, with elastic rubber, etc.), to maintain or develop speed (ability to perform sprints in the shortest possible time possible and repeat them the greatest number of times)	Between 15 and 30 minutes	4-5 days	No		No			Lack of knowledge about what is the ideal warm-up for this occasion.	During the initial warm-up, At the end of the game
2021-09-28 12:49:21	Yes	24	Women	167	80	Málaga	Local	Local (4 years)	2020-2021	Youth categories	Between 2 and 3 games/week	Senior, Junior, Cadet, Children, Mini, Premini and Baby	Yes	No	To maintain or develop speed (ability to perform sprints in the shortest possible time and repeat them the largest number of times)	Between 45 and 60 minutes	2-3 days	No		No			Because I comment on the game with my partner, I hydrate myself and see how the record and the surrounding games are going	During the initial warm-up
2021-09-28 12:49:39	Yes	35	Men	175	78	NERJA	Local	Local 1 year	2020-2021	Youth categories	Between 1 and 2 games/week	From Junior down	Yes	No	To maintain or develop aerobic resistance (swimming, cycling, career, jumping, etc.), to maintain or develop muscle strength (different muscle strengthening techniques with machines, with free weight, with body weight itself, with elastic rubber, etc.)	More than 60 minutes	4-5 days	Yes	5 minutes	No			I don't notice that I need	During the initial warm-up		okay
2021-09-28 12:55:56	Yes	52	Men	176	85	Malaga	Local	24 years	2018-2019	Senior category, Youth categories	Between 2 and 3 games/week	Provincial	Yes	No	To maintain or develop aerobic resistance (swimming, cycling, career, jumping, etc.)	Between 30 and 45 minutes	2-3 days	Yes	10-12 minutes	No			There is no time in provincial competitions. You can hardly drink a little, dry your sweat, check that the points and record are fine ...	During the initial warm-up, At the end of the game		Thank you
2021-09-28 13:00:32	Yes	20	Men	171	68	Málaga, Málaga	Local	Local(year and a half),Regional (without experience), National (without experience), International (without experience)	2019-2020	Youth categories	Between 2 and 3 games/week	From Baby to Junior	Yes	No	To maintain or develop aerobic resistance (swimming, cycling, career, jumped to the commits, etc.), to maintain or develop speed (ability to perform sprints in the shortest possible time and repeat them the largest number of times)	Between 15 and 30 minutes	1 day	Yes	3 minutes	No	Jog or run, Stretches and joint mobility			During the initial warm-up
2021-09-28 13:14:33	Yes	22	Men	177	67	Marbella	Regional	Regional 4 years	2018-2019	Senior category, Youth categories	7 or more games/week	Provincial	Yes	Yes	To maintain or develop aerobic resistance (swimming, cycling, career, jumping, etc.), to maintain or develop muscle strength (different muscle strengthening techniques with machines, with free weight, with body weight itself, with elastic gums, etc.), to maintain or develop speed (ability to perform sprints in the shortest possible time and repeat them the largest number of times), to maintain or…	More than 60 minutes	6-7 days	Yes	5 to 15 minutes, it depends on the game to be refereed, it is not the same senior as 5 -year -old children	No			The rest does not last more than 10 minutesm, there is no time to deactivate, but I stretch	During the initial warm-up, At the break between the first and second quarters, During the break between halves, At the break between the third and last quarter, At the end of the game
2021-09-28 13:36:17	Yes	19	Women	181	65	Marbella, Málaga	Local	Local (2 years)	2020-2021	Senior category, Youth categories	Between 3 and 4 games/week	2020-2021, 2021-2022	Yes	No	To maintain or develop aerobic resistance (swimming, cycling, career, jumped to the commons, etc.), to maintain or develop speed (ability to perform sprints in the shortest possible time and repeat them the greatest number of times), for maintain or develop flexibility (either with the body itself, help from another person, or with elements such as towels, elastic rubber, foam roller, etc.), to m…	Between 30 and 45 minutes	6-7 days	No	-	No		-	I am a table officer	Never
2021-09-28 13:47:08	Yes	50	Men	182	90	Málaga	Local, Regional, International	Local 15, regional 10 , International 8	2018-2019	Senior category, Youth categories	Between 3 and 4 games/week	Provincial	Yes	No	To maintain or develop aerobic resistance (swimming, cycling, career, jumping, etc.), to maintain or develop muscle strength (different muscle strengthening techniques with machines, with free weight, with body weight itself, with elastic gums, etc.), to maintain or develop speed (ability to perform sprints in the shortest possible time and repeat them the largest number of times), to maintain or…	Between 30 and 45 minutes	2-3 days	Yes	10 minutes	No				During the initial warm-up
2021-09-28 13:58:21	Yes	20	Women	166	50	Málaga	Local	Local 2 years, Regional, National and International (without experience)	2019-2020	Youth categories	1 game/week	Premini Basket and Mini Basket	Yes	No	To maintain or develop aerobic resistance (swimming, cycling, career, jumped to the commits, etc.), to maintain or develop speed (ability to perform sprints in the shortest possible time and repeat them the largest number of times)	More than 60 minutes	2-3 days	Yes	Between 10-15 minutes	No				During the initial warm-up
2021-09-28 13:59:11	Yes	22	Men	183	70	Málaga	Local	Local 4 years	2018-2019	Youth categories	Between 3 and 4 games/week	Provincial	Yes	No	To maintain or develop aerobic resistance (swimming, cycling, career, jumping, etc.), to maintain or develop muscle strength (different muscle strengthening techniques with machines, with free weight, with body weight itself, with elastic gums, etc.), to maintain or develop speed (ability to perform sprints in the shortest possible time and repeat them the largest number of times)	More than 60 minutes	4-5 days	No		No			I have never considered doing it, although right now I see that it may be necessary	During the initial warm-up
2021-09-28 14:30:06	Yes	20	Men	192	90	Málaga	Local	Local (2years)	2020-2021	Youth categories	Between 4 and 5 games/week	2019-2020	Yes	No	To maintain or develop aerobic resistance (swimming, cycling, career, jumping, etc.), to maintain or develop muscle strength (different muscle strengthening techniques with machines, with free weight, with body weight itself, with elastic gums, etc.), to maintain or develop speed (ability to perform sprints in the shortest possible time and repeat them the largest number of times), to maintain or…	More than 60 minutes	2-3 days	Yes	3 minutes	Yes	Stretches and joint mobility	Not to relax the joints		During the initial warm-up, During the break between halves, At the end of the game
2021-09-28 14:35:57	Yes	42	Men	182	105	Málaga	Local	Local (10 years)	2018-2019	Senior category, Youth categories	Between 1 and 2 games/week	provincial	Yes	No	To maintain or develop aerobic resistance (swimming, cycling, career, jumping, etc.), to maintain or develop muscle strength (different muscle strengthening techniques with machines, with free weight, with body weight itself, with elastic rubber, etc.)	Between 45 and 60 minutes	4-5 days	Yes	5-10 minutes	No	Jog or run, Stretches and joint mobility		I keep standing or moving so as not to cool	During the initial warm-up
2021-09-28 15:18:27	Yes	33	Men	188	75	Málaga	Local, Regional	Local and regional 12 years	2018-2019	Senior category, Youth categories	7 or more games/week	Provincial and local	Yes	No	To maintain or develop aerobic resistance (swimming, cycling, career, jumping, etc.), to maintain or develop muscle strength (different muscle strengthening techniques with machines, with free weight, with body weight itself, with elastic gums, etc.), to maintain or develop flexibility (either with the body, help from another person, or with elements such as towels, elastic rubber, foam roller, e…	More than 60 minutes	4-5 days	Yes	5-10 minutes	Yes	Stretches and joint mobility	If I do not stretch and do some joint mobility, I notice that I am grabbed and then I do not run so much or as comfortable as before		During the initial warm-up, During the break between halves, At the end of the game
2021-09-28 15:47:17	Yes	28	Men	172	74	Alhaurín de la Torre (Málaga)	Local	Local (5 years)	2018-2019	Senior category	Between 4 and 5 games/week	Fab Málaga from categories below senior categories	Yes	No	To maintain or develop aerobic resistance (swimming, cycling, career, jumping, etc.), to maintain or develop muscle strength (different muscle strengthening techniques with machines, with free weight, with body weight itself, with elastic rubber, etc.)	Between 45 and 60 minutes	4-5 days	Yes	3-5 minutes	No	Jog or run, Running at maximum speed (sprinting), Stretches and joint mobility		Ignorance of its need	During the initial warm-up
2021-09-28 15:54:20	Yes	51	Men	189	99	NERJA (MÁLAGA)	Local	18 y	2018-2019	Senior category, Youth categories	Between 3 and 4 games/week	PROVINCIAL	Yes	No	To maintain or develop aerobic resistance (swimming, cycling, career, jumping, etc.)	Between 30 and 45 minutes	2-3 days	Yes	10-15 minutes	Yes	Stretches and joint mobility			During the initial warm-up, During the break between halves, At the end of the game	To prevent muscle breaks
2021-09-28 16:13:01	Yes	45	Men	172	112	malaga	Local	29 year	2020-2021	Senior category, Youth categories	Between 6 and 7 games/week	provincial	Yes	No	To maintain or develop aerobic resistance (swimming, cycling, career, jumping, etc.)	Between 15 and 30 minutes	2-3 days	Yes	20 minutes before the game	No			We talk to the partner how the game is going	During the initial warm-up, At the end of the game		I hope it serves you. A greeting from a partner, Piti
2021-09-28 16:38:09	Yes	35	Men	172	75	Álora	Local	Local (5years)	2018-2019	Senior category, Youth categories	Between 6 and 7 games/week	Senior provincial, provincial lower categories	Yes	No	To maintain or develop aerobic resistance (swimming, cycling, career, jumping, etc.), to maintain or develop muscle strength (different muscle strengthening techniques with machines, with free weight, with body weight itself, with elastic gums, etc.), to maintain or develop other capacities (coordination, balance, agility)	More than 60 minutes	4-5 days	Yes	10 minutes	Yes	Jog or run, Strength exercise (jumps, push-ups, etc.), Stretches and joint mobility, Breath management techniques (activation/relaxation, awareness)	To enter again with a good muscle temprature and maintain concentration from the beginning		During the initial warm-up, During the break between halves, At the break between the third and last quarter, At the end of the game
2021-09-28 17:34:39	Yes	19	Men	177	56	Málaga	Local	Local (1 year) regional (without experience) International (without experience)	2020-2021	Youth categories	Between 3 and 4 games/week	Minibasket, Priminibasket and Babybasket, Pre Infant, Children, Cadet, Junior.	Yes					Yes	3 minutes	Yes	Stretches and joint mobility, Breath management techniques (activation/relaxation, awareness)	Not to suffer injuries		During the initial warm-up, During the break between halves
2021-09-28 20:42:36	Yes	22	Men	196	92	Málaga	Local	Local 5 years	2019-2020	Senior category	Between 4 and 5 games/week	Senior, Junior, to Baby, Mincopa Endesa and Fym	Yes	No	To maintain or develop aerobic resistance (swimming, cycling, career, jumped to the commits, etc.), to maintain or develop speed (ability to perform sprints in the shortest possible time and repeat them the largest number of times)	More than 60 minutes	2-3 days	Yes	5-8 minutes	No			I didn't believe it necessary, I receive feedback about the first half from my colleagues	During the initial warm-up, At the end of the game
2021-09-28 23:21:49	Yes	19	Men	188	77.2	Torre del Mar, Málaga	Local	Local (1 year), Regional (without experience), National (without experience), International (without experience)	2020-2021	Youth categories	Between 1 and 2 games/week	FAB, Provincial Leagues	Yes	No	To maintain or develop aerobic resistance (swimming, cycling, career, jumping, etc.), to maintain or develop muscle strength (different muscle strengthening techniques with machines, with free weight, with body weight itself, with elastic gums, etc.), to maintain or develop speed (ability to perform sprints in the shortest possible time and repeat them the largest number of times), to maintain or…	More than 60 minutes	4-5 days	Yes	3-5 minutes	Yes	Stretches and joint mobility, Breath management techniques (activation/relaxation, awareness)	To continue warm		During the initial warm-up, During the break between halves	Lack of time. Little time to change the arena, little time to move from one game to another. I do not consider it of great importance. If I have an overload, I stretch when I arrive at my house.
2021-09-29 14:39:20	Yes	24	Men	180	60	Málaga	Regional	5 years	2018-2019	Senior category, Youth categories	Between 4 and 5 games/week	Camp. Pr. Malaga	Yes	No	To maintain or develop aerobic resistance (swimming, cycling, career, jumped to the Comba, etc.), to maintain or develop other capacities (coordination, balance, agility)	More than 60 minutes	6-7 days	No		No			Talk with colleagues about refereeing and game, I do not consider it of great importance.	Never
2021-10-01 18:32:49	Yes	38	Men	180	74	Málaga	Local, Regional, National	15 in total, 7 national	2018-2019	Senior category, Youth categories	Between 4 and 5 games/week	Group 3	Yes	No	To maintain or develop aerobic resistance (swimming, cycling, career, jumping, etc.), to maintain or develop muscle strength (different muscle strengthening techniques with machines, with free weight, with body weight itself, with elastic gums, etc.), to maintain or develop speed (ability to perform sprints in the shortest possible time and repeat them the largest number of times), to maintain or…	More than 60 minutes	4-5 days	Yes	10-15 minutes	No	Jog or run, Running at maximum speed (sprinting), Stretches and joint mobility		I have not considered it necessary	During the initial warm-up, At the end of the game
2021-10-01 18:33:36	Yes	29	Men	183	80	Madrid, Madrid	Local, Regional, National	Local 11 years, Regional 9 years, National 2 years, International without experiencis	2018-2019	Senior category, Youth categories	Between 4 and 5 games/week	National and Autonomical Categories	Yes	Yes	To maintain or develop muscle strength (different muscle strengthening techniques with machines, with free weight, with body weight itself, with elastic rubber, etc.)	More than 60 minutes	4-5 days	Yes	5-10 minutes	No			It does not seem necessary	During the initial warm-up
2021-10-01 18:33:38	Yes	27	Men	179	88	Tiana, Barcelona	Local, Regional, National	Local (8 years), Regional (8 years), National (2 years), International (without experience)	2020-2021	Senior category	Between 1 and 2 games/week	FEB Group 3	Yes	No	To maintain or develop aerobic resistance (swimming, cycling, career, jumping, etc.), to maintain or develop muscle strength (different muscle strengthening techniques with machines, with free weight, with body weight itself, with elastic rubber, etc.)	Between 45 and 60 minutes	4-5 days	Yes	3-4 minutes	No	Jog or run, Running at maximum speed (sprinting), Stretches and joint mobility		There is not too much time, once you retunr to the locked room for resting 10 minutes.	During the initial warm-up		Good luck with the work!
2021-10-01 18:33:40	Yes	32	Men	186	77	León	National	7 National	2020-2021	Senior category, Youth categories	Between 1 and 2 games/week	Linked Group 2 (current G3)	Yes	No	To maintain or develop aerobic resistance (swimming, cycling, career, jumping, etc.)	Between 30 and 45 minutes	4-5 days	Yes	7-14 minutes	Yes	Stretches and joint mobility	Enter concentrated in 3q		During the initial warm-up, During the break between halves, At the end of the game
2021-10-01 18:33:52	Yes	32	Men	177	70	MADRID	Local, Regional, National	Local (2 years), Regional (11 years), National (4 years)	2018-2019	Senior category, Youth categories	Between 1 and 2 games/week	FEB Group 3 (EBA and LF2) and regional categories	Yes	No	To maintain or develop aerobic resistance (swimming, cycling, career, jumping, etc.), to maintain or develop muscle strength (different muscle strengthening techniques with machines, with free weight, with body weight itself, with elastic gums, etc.), to maintain or develop speed (ability to perform sprints in the shortest possible time and repeat them the largest number of times), to maintain or…	Between 45 and 60 minutes	2-3 days	Yes	(10-15 minutes)	No	Jog or run, Running at maximum speed (sprinting), Stretches and joint mobility		Lack of time	During the initial warm-up
2021-10-01 18:34:12	Yes	33	Men	180	76	Valencia	National	Regional (6years) National (4years) International ( without experience)	2020-2021	Senior category	Between 1 and 2 games/week	Group 2	Yes	No	To maintain or develop aerobic resistance (swimming, cycling, career, jumping, etc.), to maintain or develop muscle strength (different muscle strengthening techniques with machines, with free weight, with body weight itself, with elastic rubber, etc.)	Between 30 and 45 minutes	4-5 days	Yes	7 minutes	No			I really have no reason, but I should do it	At the end of the game
2021-10-01 18:34:30	Yes	36	Men	184	76	Barcelona	Regional, National	Regional 10 years, National 3 years, International without experience	2019-2020	Senior category, Youth categories	Between 2 and 3 games/week	FEB GROUP 3 + Autonomic Categories	Yes	No	To maintain or develop aerobic resistance (swimming, cycling, career, jumping, etc.), to maintain or develop muscle strength (different muscle strengthening techniques with machines, with free weight, with body weight itself, with elastic rubber, etc.)	Between 45 and 60 minutes	4-5 days	Yes	5-10 minutes	No			Lack of time during the break	During the initial warm-up, At the end of the game
2021-10-01 18:34:40	Yes	30	Men	186	84	Pamplona, Navarra	Local, Regional, National	10 y	2020-2021	Senior category, Youth categories	Between 2 and 3 games/week	Group 2	Yes	No	To maintain or develop aerobic resistance (swimming, cycling, career, jumping, etc.), to maintain or develop muscle strength (different muscle strengthening techniques with machines, with free weight, with body weight itself, with elastic rubber, etc.)	Between 45 and 60 minutes	2-3 days	Yes	5 minutes	No			Lack of habit	During the initial warm-up, At the end of the game
2021-10-01 18:34:53	Yes	35	Women	168	50	Madrid	National	Regional 15 years, National 7 years	2021-2022	Senior category	1 game/week	Group 2	Yes	No	To maintain or develop muscle strength (different muscle strengthening techniques with machines, with free weight, with body weight itself, with elastic rubber, etc.), to maintain or develop other abilities (coordination, balance, agility)	Between 45 and 60 minutes	2-3 days	Yes	15-20 minutes	No			Lack of habit	During the initial warm-up, At the end of the game
2021-10-01 18:35:08	Yes	33	Men	183	83	Barcelona	National	Regional (4 years), National (4 years)	2020-2021	Senior category, Youth categories	Between 2 and 3 games/week	FEB Group 3	Yes	No	To maintain or develop aerobic resistance (swimming, cycling, career, jumping, etc.), to maintain or develop muscle strength (different muscle strengthening techniques with machines, with free weight, with body weight itself, with elastic gums, etc.), to maintain or develop speed (ability to perform sprints in the shortest possible time and repeat them the largest number of times)	Between 45 and 60 minutes	4-5 days	Yes	10 minutes	No				During the break between halves, At the end of the game
2021-10-01 18:35:23	Yes	28	Men	178	76	Zumarraga, guipuzkoa	Local, Regional, National	Regional(12), Regional(9),National(5)	2020-2021	Senior category	7 or more games/week	Group 3	Yes	No	To maintain or develop aerobic resistance (swimming, cycling, career, jumping, etc.), to maintain or develop muscle strength (different muscle strengthening techniques with machines, with free weight, with body weight itself, with elastic gums, etc.), to maintain or develop speed (ability to perform sprints in the shortest possible time and repeat them the largest number of times)	More than 60 minutes	6-7 days	Yes	30 minutes	No			There is no time	During the initial warm-up, At the end of the game
2021-10-01 18:36:01	Yes	30	Women	170	57	A Coruña	Local, Regional, National	Local (11) Regional (9) National (6)	2019-2020	Senior category, Youth categories	Between 2 and 3 games/week	Group 1 (2018-2019/2019-2020/2021-2021) Group 2 (2021-2022) Group 3 (2016-2017/2017-2018)	Yes	No	To maintain or develop muscle strength (different muscle strengthening techniques with machines, with free weight, with body weight itself, with elastic rubber, etc.), to maintain or develop speed (ability to perform sprints in the shortest possible time possible and repeat them the greatest number of times), to maintain or develop other capacities (coordination, balance, agility)	More than 60 minutes	2-3 days	Yes	5-7 minutes warm-up, 5 minutes stretch	No			I do not have that routine because I do not consider it necessary	During the initial warm-up, At the end of the game
2021-10-01 18:36:39	Yes	31	Men	182	82	Villanueva del Pardillo, Madrid	National	Local (varios years), Regional (1 year), National (4), International (w/e)	2018-2019	Senior category, Youth categories	Between 3 and 4 games/week	FEB Group 2 (then EBA and LF2 Liga), and autonomic categories	Yes	No	To maintain or develop aerobic resistance (swimming, cycling, career, jumping, etc.), to maintain or develop muscle strength (different muscle strengthening techniques with machines, with free weight, with body weight itself, with elastic rubber, etc.)	More than 60 minutes	2-3 days	Yes	12-15 minutes	No			We usually talk about the game itself, and 10 min during the rest is not enough time	During the initial warm-up
2021-10-01 18:36:47	Yes	29	Men	189	97	Sant Iscle de Vallalta, Barcelona	Local, Regional, National	Local: 11 years, Regional 7, National 1 year, International without experience	2018-2019	Senior category, Youth categories	Between 5 and 6 games/week	Autonomous	Yes	No	To maintain or develop aerobic resistance (swimming, cycling, career, jumping, etc.), to maintain or develop muscle strength (different muscle strengthening techniques with machines, with free weight, with body weight itself, with elastic rubber, etc.)	More than 60 minutes	4-5 days	No		No			I have never considered it	During the initial warm-up
2021-10-01 18:37:19	Yes	32	Men	188	86	Malaga	National	Local 6 Regional 2 National 7	2020-2021	Senior category	1 game/week	Group 1	Yes	No	To maintain or develop aerobic resistance (swimming, cycling, career, jumping, etc.), to maintain or develop muscle strength (different muscle strengthening techniques with machines, with free weight, with body weight itself, with elastic gums, etc.), to maintain or develop other capacities (coordination, balance, agility)	Between 45 and 60 minutes	2-3 days	Yes	10 minutes	No			I use it to rest, change t -shirt, and share feedback among colleagues	During the initial warm-up, At the end of the game
2021-10-01 18:37:57	Yes	29	Men	177	72	Torrent	Local, Regional	Locas (7 years), Regional (4 years)	2018-2019	Senior category, Youth categories	Between 5 and 6 games/week	Cto. 1 National Division	Yes	No	To maintain or develop aerobic resistance (swimming, cycling, career, jumping, etc.), to maintain or develop muscle strength (different muscle strengthening techniques with machines, with free weight, with body weight itself, with elastic rubber, etc.)	More than 60 minutes	4-5 days	Yes	5-10 minutes	No			Because in that time I did not cool enough	During the initial warm-up
2021-10-01 18:38:49	Yes	35	Men	183	84	Barcelona	National	Regional (15 years), National (5 years)	2020-2021	Senior category	Between 1 and 2 games/week	FEB Group 3 (EBA LIGA, LF2)	No	No	To maintain or develop aerobic resistance (swimming, cycling, career, jumping, etc.)	Between 45 and 60 minutes	2-3 days	Yes	5-10 minutes	No	Jog or run, Stretches and joint mobility			During the initial warm-up, At the end of the game
2021-10-01 18:41:34	Yes	32	Men	182	80	Murcia	National	Local 4 years. Regional 2 years. National 6	2020-2021	Senior category	Between 1 and 2 games/week	Group 3	Yes	Yes	To maintain or develop aerobic resistance (swimming, cycling, career, jumping, etc.), to maintain or develop muscle strength (different muscle strengthening techniques with machines, with free weight, with body weight itself, with elastic gums, etc.), to maintain or develop speed (ability to perform sprints in the shortest possible time and repeat them the largest number of times), to maintain or…	Between 45 and 60 minutes	1 day	Yes	Between 3-5 minutes	No			Lack of routine.	During the initial warm-up, At the end of the game
2021-10-01 18:43:04	Yes	29	Men	181	78	Vilanova de Arousa	Local, Regional, National	Local(2 years), Regional (2 years) , National(4 years)	2020-2021	Senior category, Youth categories	Between 5 and 6 games/week	Group 3 Feb	Yes	No	To maintain or develop aerobic resistance (swimming, cycling, career, jumping, etc.), to maintain or develop muscle strength (different muscle strengthening techniques with machines, with free weight, with body weight itself, with elastic rubber, etc.)	More than 60 minutes	4-5 days	No		Yes	Stretches and joint mobility, Coordination and balance exercises	Because the teams are going to stop and it is one of the important moments of the game, you have to be activated		During the initial warm-up, During the break between halves
2021-10-01 18:43:16	Yes	35	Men	187	80	Bilbao	National	Local (2 years), Regional (2 years), National (8 years) and International (without experience)	2018-2019	Senior category	Between 1 and 2 games/week	Group 1 (Leb Gold, Leb Plata and LF)	Yes	No	To maintain or develop aerobic resistance (swimming, cycling, career, jumping, etc.), to maintain or develop muscle strength (different muscle strengthening techniques with machines, with free weight, with body weight itself, with elastic rubber, etc.)	More than 60 minutes	4-5 days	Yes	5-10 minutes	Yes	Stretches and joint mobility	So that the muscle is not cold and avoid injuries		During the initial warm-up, During the break between halves, At the end of the game
2021-10-01 18:45:31	Yes	50	Men	173	72	Arcahueja (León)	Local, National	Local (4 years), National (30 years)	2018-2019	Senior category	Between 1 and 2 games/week	FEB Group 3	Yes	No	To maintain or develop aerobic resistance (swimming, cycling, career, jumped to the commits, etc.), to maintain or develop speed (ability to perform sprints in the shortest possible time and repeat them the largest number of times)	Between 45 and 60 minutes	4-5 days	Yes	10-15 minutes	No			The rest lasts 10 minutes. Between going to the locker room and returning, 4-5 minutes have passed. Having to be in the court with a minimum of 3 minutes before starting. There are a couple of minutes left in which, as a rule, I don't usually get cold.	During the initial warm-up, At the end of the game
2021-10-01 18:53:36	Yes	37	Men	191	87	San Fernando, Cádiz	Local, Regional, National	Local (1 year) Regional (3 years) National (12 years)	2018-2019	Senior category	Between 1 and 2 games/week	FEB, Group 3	Yes	No	To maintain or develop aerobic resistance (swimming, cycling, career, jumping, etc.), to maintain or develop muscle strength (different muscle strengthening techniques with machines, with free weight, with body weight itself, with elastic gums, etc.), to maintain or develop flexibility (either with the body, help from another person, or with elements such as towels, elastic rubber, foam roller, e…	Between 45 and 60 minutes	4-5 days	Yes	10-15 minutes	No			There is not enough time	During the initial warm-up
2021-10-01 18:54:37	Yes	33	Men	172	71	Santiago de Compostela, A Coruña	Local, Regional, National	Local (10 years), Regional (9 years), National (7years)	2020-2021	Senior category, Youth categories	Between 3 and 4 games/week	Group 3	Yes	No	To maintain or develop muscle strength (different muscle strengthening techniques with machines, with free weight, with body weight itself, with elastic rubber, etc.), to maintain or develop speed (ability to perform sprints in the shortest possible time possible and to repeat them the greatest number of times), to maintain or develop flexibility (either with the body itself, help from another pe…	More than 60 minutes	4-5 days	Yes	5-10 minutes	No			Matter of time. The break lasts 10 minutes, between access to the locker room, record review, talk with the partner and back to court, it is complicated. I understand that in categories with 15 minutes it is feasible.	During the initial warm-up, At the end of the game
2021-10-01 19:01:00	Yes	35	Men	190	88	Ourense	Local, Regional, National	Local (2 years), Regional (2 years), National (5 years)	2019-2020	Senior category, Youth categories	Between 1 and 2 games/week	Group 2 (now Group 3)	Yes	No	To maintain or develop aerobic resistance (swimming, cycling, career, jumping, etc.), to maintain or develop flexibility (either with the body, help from another person, or with elements such as towels, elastic rubbers , Foam Roller, etc.), to maintain or develop other capacities (coordination, balance, agility)	Between 30 and 45 minutes	2-3 days	Yes	5 minutes	No			I have never considered it and therefore I never do it	During the initial warm-up, At the end of the game
2021-10-01 19:01:43	Yes	29	Men	190	101	Lugo	Local, Regional, National	4 years local; 2 years Regional; 4 years National	2018-2019	Senior category, Youth categories	Between 5 and 6 games/week	G3 Feb	Yes	Yes	To maintain or develop aerobic resistance (swimming, cycling, career, jumping, etc.), to maintain or develop muscle strength (different muscle strengthening techniques with machines, with free weight, with body weight itself, with elastic gums, etc.), to maintain or develop speed (ability to perform sprints in the shortest possible time and repeat them the largest number of times), to maintain or…	More than 60 minutes	4-5 days	Yes	5 minutes of continuous running, and 2-3 minutesS of dynamic stretching	No			I do not have, but I should do them to avoid getting cold after the break, but in matches with 10 min of break there is not enough time	During the initial warm-up, At the end of the game
2021-10-01 19:02:53	Yes	29	Men	166	62	Tenerife	National	6 years Regional and 2 years National	2019-2020	Senior category	Between 1 and 2 games/week	FEB GRUPO III LIGA EBA AND LF2	Yes	No	To maintain or develop aerobic resistance (swimming, cycling, career, jumping, etc.), to maintain or develop muscle strength (different muscle strengthening techniques with machines, with free weight, with body weight itself, with elastic gums, etc.), to maintain or develop other capacities (coordination, balance, agility)	More than 60 minutes	4-5 days	Yes	5 minutes of warm-up, joint mobility and jogging	No			I'm still active and I don't have a hard time continuing in the game at the same rhythm	During the initial warm-up, At the end of the game
2021-10-01 19:03:04	Yes	35	Men	174	84.8	Lleida	Local, Regional, National	Local (6years) Regional (12 years) National (4years)	2020-2021	Senior category	Between 1 and 2 games/week	Group 3, EBA and Women's League 2	Yes	No	To maintain or develop aerobic resistance (swimming, cycling, career, jumping, etc.), to maintain or develop muscle strength (different muscle strengthening techniques with machines, with free weight, with body weight itself, with elastic gums, etc.), to maintain or develop flexibility (either with the body, help from another person, or with elements such as towels, elastic rubber, foam roller, e…	More than 60 minutes	4-5 days	Yes	10 to 15 minutes minutes as a minimum	No			Honestly I have never considered it.	During the initial warm-up, At the end of the game
2021-10-01 19:07:33	Yes	35	Men	188	78	Pamplona	Local, Regional, National	Local (11 years) Regional (9 years) National (4 years) International (without experience)	2020-2021	Senior category, Youth categories	Between 4 and 5 games/week	Group 3 and Autonomous/Local Categories	Yes	No				Yes	5-10 minutes	No			I have never considered it.	During the initial warm-up, At the end of the game		Thanks you and all the best with the study.
2021-10-01 19:26:58	Yes	34	Men	172	74	Córdoba	National	National(11 years)	2020-2021	Senior category	1 game/week	FEB Group 3 (2020-21)	Yes	Yes	To maintain or develop muscle strength (different muscle strengthening techniques with machines, with free weight, with body weight itself, with elastic rubber, etc.), to maintain or develop speed (ability to perform sprints in the shortest possible time possible and repeat them the greatest number of times)	More than 60 minutes	4-5 days	Yes	15-20 minutes	Yes	Stretches and joint mobility, Coordination and balance exercises, Breath management techniques (activation/relaxation, awareness)	To reactivate at the muscle level and prevent injuries		During the initial warm-up, During the break between halves, At the end of the game
2021-10-01 19:30:13	Yes	48	Men	176	72	Barcelona	Regional, National	Regional (9 years), National (24)	2018-2019	Senior category, Youth categories	Between 2 and 3 games/week	FEB Group 1	Yes	No	To maintain or develop aerobic resistance (swimming, cycling, career, jumped to the commits, etc.), to maintain or develop speed (ability to perform sprints in the shortest possible time and repeat them the largest number of times)	Between 45 and 60 minutes	6-7 days	Yes	5 minutes	No			I usually use the break for teamwork and work more mental than physical aspects.	During the initial warm-up, At the end of the game
2021-10-01 19:54:36	Yes	32	Men	191	79	Vilagarcía de Arousa, Pontevedra	Local, Regional, National	Local 7 years Regional 3 years National 1 year	2020-2021	Senior category, Youth categories	Between 3 and 4 games/week	Group 3	Yes	No	To maintain or develop aerobic resistance (swimming, cycling, career, jumping, etc.), to maintain or develop muscle strength (different muscle strengthening techniques with machines, with free weight, with body weight itself, with elastic rubber, etc.)	More than 60 minutes	4-5 days	Yes	5-10 minutes	No			Preference for undergoing technical talks with the partner	During the initial warm-up, At the end of the game
2021-10-01 19:58:25	Yes	50	Men	189	80	LEON	Local, Regional, National	National 23 years, REGIONAL 7 years, Local 3 years	2018-2019	Senior category	1 game/week	GROUP 1	Yes	No	To maintain or develop aerobic resistance (swimming, cycling, career, jumping, etc.), to maintain or develop flexibility (either with the body, help from another person, or with elements such as towels, elastic rubbers , Foam Roller, etc.), to maintain or develop other capacities (coordination, balance, agility)	Between 30 and 45 minutes	2-3 days	Yes	5-10 minutes	No				During the initial warm-up, At the end of the game
2021-10-01 20:09:16	Yes	29	Men	181	74	Madrid, Madrid	Local, Regional, National	Local (10 years) Regional (6 years) National (first season)	2019-2020	Senior category, Youth categories	Between 4 and 5 games/week	National Madrid and all lower categories	Yes	Yes	To maintain or develop aerobic resistance (swimming, cycling, career, jumping, etc.), to maintain or develop muscle strength (different muscle strengthening techniques with machines, with free weight, with body weight itself, with elastic rubber, etc.)	More than 60 minutes	4-5 days	Yes	5 minutes	Yes	Stretches and joint mobility	Important to stay active so as not to enter too relaxed to the second half and that this state of relaxation makes us make mistakes		During the initial warm-up, During the break between halves, At the end of the game
2021-10-01 20:16:35	Yes	31	Men	180	79	Girona	National	National 11 years	2018-2019	Senior category	Between 1 and 2 games/week	2	Yes	No	To maintain or develop aerobic resistance (swimming, cycling, career, jumping, etc.)	Between 30 and 45 minutes	2-3 days	Yes	10 minutes	No			It is little time	During the initial warm-up, At the end of the game
2021-10-01 20:16:50	Yes	30	Men	186	82	Barcelona	National	Regional (5) National (5)	2018-2019	Senior category	1 game/week	Group 1	Yes	No	To maintain or develop aerobic resistance (swimming, cycling, career, jumping, etc.), to maintain or develop muscle strength (different muscle strengthening techniques with machines, with free weight, with body weight itself, with elastic rubber, etc.)	Between 45 and 60 minutes	4-5 days	No	10 minutes	No			Ignorance and lack of awareness.	During the initial warm-up
2021-10-01 20:18:03	Yes	32	Men	174	72	Getxo, Bizkaia	Local, Regional, National	Local 11 years, Regional 8 years y National 4 years	2020-2021	Senior category	Between 1 and 2 games/week	Group 3	Yes	Yes	To maintain or develop aerobic resistance (swimming, cycling, career, jumping, etc.), to maintain or develop muscle strength (different muscle strengthening techniques with machines, with free weight, with body weight itself, with elastic gums, etc.), to maintain or develop speed (ability to perform sprints in the shortest possible time and repeat them the largest number of times)	More than 60 minutes	6-7 days	No		No			Lack of knowledge	Never
2021-10-01 21:20:53	Yes	37	Women	171	59	Alcalá de Henares	Local, Regional, National	20 years Local, 20 years Regional, 5 years National	2020-2021	Senior category, Youth categories	Between 1 and 2 games/week	Group 1	Yes	No	To maintain or develop aerobic resistance (swimming, cycling, career, jumping, etc.), to maintain or develop muscle strength (different muscle strengthening techniques with machines, with free weight, with body weight itself, with elastic gums, etc.), to maintain or develop flexibility (either with the body, help from another person, or with elements such as towels, elastic rubber, foam roller, e…	More than 60 minutes	4-5 days	Yes	10 minutes	No			Not enough time	During the initial warm-up, At the end of the game		Concentration techniques would be appreciated before and at the break of the matches
2021-10-01 21:47:23	Yes	29	Men	185	77	Andoain, Gipuzkoa	Regional	9 years	2018-2019	Senior category	Between 4 and 5 games/week	Autonomics	Yes	No	To maintain or develop muscle strength (different muscle strengthening techniques with machines, with free weight, with body weight itself, with elastic rubber, etc.)	Between 45 and 60 minutes	4-5 days	No	5-10 minutes	Yes	Stretches and joint mobility	Sot that joints do not coold and not to lose the activity		During the initial warm-up, At the break between the first and second quarters, At the end of the game
2021-10-01 21:47:54	Yes	34	Men	177	77	Avilés, Asturias	Local, Regional, National	Regional 12 years , National 5 years	2019-2020	Senior category, Youth categories	Between 3 and 4 games/week	Group 3	Yes	No	To maintain or develop aerobic resistance (swimming, cycling, career, jumping, etc.), to maintain or develop muscle strength (different muscle strengthening techniques with machines, with free weight, with body weight itself, with elastic gums, etc.), to maintain or develop flexibility (either with the body, help from another person, or with elements such as towels, elastic rubber, foam roller, e…	More than 60 minutes	2-3 days	Yes	15 minutes	No			Lack of time	During the initial warm-up, At the end of the game
2021-10-01 21:51:35	Yes	29	Women	160	55	Melilla	Local, Regional, National	Local and Regional (6years) National (3 years)	2018-2019	Senior category	Between 1 and 2 games/week	FEB Group 3	Yes	Yes	To maintain or develop aerobic resistance (swimming, cycling, career, jumping, etc.), to maintain or develop muscle strength (different muscle strengthening techniques with machines, with free weight, with body weight itself, with elastic gums, etc.), to maintain or develop speed (ability to perform sprints in the shortest possible time and repeat them the largest number of times), to maintain or…	More than 60 minutes	4-5 days	Yes	15-20 minutes	No			I try to rest	During the initial warm-up
2021-10-01 21:55:33	Yes	29	Women	177	72	MADRID	National	3 years national; 6 years Regional	2019-2020	Senior category, Youth categories	Between 6 and 7 games/week	FEB Group and Autonomous Category	Yes	No	To maintain or develop muscle strength (different muscle strengthening techniques with machines, with free weight, with body weight itself, with elastic rubber, etc.), to maintain or develop other abilities (coordination, balance, agility)	Between 45 and 60 minutes	4-5 days	Yes	Between 5-10 minutes	No				During the initial warm-up
2021-10-01 22:02:27	Yes	49	Men	175	73	Valladolid	Local, Regional, National	Local 30 years, Regional 28, National 24	2019-2020	Senior category	Between 2 and 3 games/week	FEB Group 2	Yes	Yes	To maintain or develop aerobic resistance (swimming, cycling, career, jumped to the commons, etc.), to maintain or develop speed (ability to perform sprints in the shortest possible time and repeat them the greatest number of times), for maintain or develop other capacities (coordination, balance, agility)	Between 45 and 60 minutes	4-5 days	Yes	Between 16-20	Yes	Stretches and joint mobility	To remain active to start after rest		During the initial warm-up, At the end of the game		Thank you
2021-10-01 22:06:42	Yes	36	Men	178	71	Zaragoza	Local, Regional, National	Regional 12 years / National 2 years	2020-2021	Senior category	Between 1 and 2 games/week	Group 2 and Maximal Autonomic Category	Yes	No	To maintain or develop aerobic resistance (swimming, cycling, career, jumping, etc.)	Between 30 and 45 minutes	2-3 days	Yes	5-7 minutes	No			Rest time. I use it to talk with the partner.	During the initial warm-up, At the end of the game
2021-10-01 22:18:25	Yes	23	Men	180	73.5	Bizkaia	Regional, National	Regional 4 years. National (2 years	2020-2021	Senior category, Youth categories	Between 3 and 4 games/week	Group 3	Yes	No	To maintain or develop aerobic resistance (swimming, cycling, career, jumping, etc.), to maintain or develop muscle strength (different muscle strengthening techniques with machines, with free weight, with body weight itself, with elastic rubber, etc.)	More than 60 minutes	6-7 days	No		No			I use the break to talk about game situations.	During the initial warm-up, During the break between halves
2021-10-01 22:29:24	Yes	35	Men	173	67	Madrid	Local, Regional, National, International	Local (1 year), regional (4 years), National (10 years), International (8 years)	2020-2021	Senior category	Between 1 and 2 games/week	FEB Group, FIBA	Yes	No	To maintain or develop aerobic resistance (swimming, cycling, career, jumping, etc.), to maintain or develop muscle strength (different muscle strengthening techniques with machines, with free weight, with body weight itself, with elastic gums, etc.), to maintain or develop speed (ability to perform sprints in the shortest possible time and repeat them the largest number of times), to maintain or…	Between 30 and 45 minutes	4-5 days	Yes	8-10 minutes	No				During the initial warm-up, At the end of the game
2021-10-01 22:39:41	Yes	35	Women	165	60	Chiclana de la Frontera, Cádiz	National	Local (2 years); Regional (3 years); National (3 years)	2020-2021	Senior category	Between 1 and 2 games/week	Local; FEB Group 3	Yes	No	To maintain or develop aerobic resistance (swimming, cycling, career, jumping, etc.), to maintain or develop muscle strength (different muscle strengthening techniques with machines, with free weight, with body weight itself, with elastic rubber, etc.)	Between 30 and 45 minutes	2-3 days	Yes	6-8 minutes	No			I have never considered it	During the initial warm-up		A little confusing the questions about the seasons. I did not know what information could be more useful or what season it was better to answer. Good luck and thanks!
2021-10-01 22:43:23	Yes	28	Men	182	76	Tarragona	National	National (2 years)	2020-2021	Senior category	Between 1 and 2 games/week	Group 3	Yes	No	To maintain or develop aerobic resistance (swimming, cycling, career, jumping, etc.), to maintain or develop muscle strength (different muscle strengthening techniques with machines, with free weight, with body weight itself, with elastic gums, etc.), to maintain or develop speed (ability to perform sprints in the shortest possible time and repeat them the largest number of times), to maintain or…	More than 60 minutes	4-5 days	Yes	5-10 minutes	Yes	Stretches and joint mobility, Breath management techniques (activation/relaxation, awareness)	Do not cool the body		During the initial warm-up, During the break between halves, At the end of the game
2021-10-01 22:43:47	Yes	33	Men	186	93	Barcelona	Local, Regional, National	Local and Regional 8 years. National 1 year.	2018-2019	Senior category, Youth categories	Between 3 and 4 games/week	1st category Catalunya Male and Catalunya Women's Cup.	Yes	No	To maintain or develop aerobic resistance (swimming, cycling, career, jumping, etc.), to maintain or develop muscle strength (different muscle strengthening techniques with machines, with free weight, with body weight itself, with elastic gums, etc.), to maintain or develop speed (ability to perform sprints in the shortest possible time and repeat them the largest number of times), to maintain or…	More than 60 minutes	6-7 days	No	-	No		-	I don't think I've ever seen a referee reactivate after the break and the fact that I've never seen him hasn't made me consider doing so. Now reading this, I think that maybe it would be a good option to be 100% at the beginning of the 3rd quarter.	During the initial warm-up
2021-10-01 23:05:35	Yes	32	Men	180	66	San Fernando (Cádiz)	National	Local (1) Regional (3) National (7)	2019-2020	Senior category	Between 1 and 2 games/week	FEB Group 3	Yes	No	To maintain or develop muscle strength (different muscle strengthening techniques with machines, with free weight, with body weight itself, with elastic rubber, etc.)	Between 45 and 60 minutes	4-5 days	Yes	5-10 minutes	No			I use it to decrease heart rate and rest	During the initial warm-up
2021-10-01 23:50:05	Yes	28	Men	189	87	Barcelona	Local, Regional	Local (9 years), Regional (6 years), National (1 year)	2018-2019	Senior category	Between 4 and 5 games/week	National and regional	Yes	Yes	To maintain or develop aerobic resistance (swimming, cycling, career, jumping, etc.), to maintain or develop muscle strength (different muscle strengthening techniques with machines, with free weight, with body weight itself, with elastic gums, etc.), to maintain or develop speed (ability to perform sprints in the shortest possible time and repeat them the largest number of times)	More than 60 minutes	4-5 days	Yes	10-12 minutes	No			When the break is 10 minutes I do not consider it strictly necessary to reactivate	During the initial warm-up
2021-10-02 00:13:26	Yes	60	Men	185	80	Granada	National	National (34years)	2018-2019	Senior category	Between 1 and 2 games/week	FEB GRUPO1	Yes	No	To maintain or develop aerobic resistance (swimming, cycling, career, jumping, etc.), to maintain or develop muscle strength (different muscle strengthening techniques with machines, with free weight, with body weight itself, with elastic gums, etc.), to maintain or develop speed (ability to perform sprints in the shortest possible time and repeat them the largest number of times), to maintain or…	Between 45 and 60 minutes	2-3 days	Yes	10-12 minutes approx	Yes	Stretches and joint mobility	The second part of the game is mentally		During the break between halves, At the end of the game		It has been a pleasure to participate in this survey
2021-10-02 00:24:26	Yes	28	Men	174	71	Salamanca	Local, Regional, National	Local (11 years) Regional (6) National (3)	2018-2019	Senior category, Youth categories	Between 1 and 2 games/week	2018-2019 Group 3	Yes	No	To maintain or develop aerobic resistance (swimming, cycling, career, jumping, etc.), to maintain or develop muscle strength (different muscle strengthening techniques with machines, with free weight, with body weight itself, with elastic gums, etc.), to maintain or develop speed (ability to perform sprints in the shortest possible time and repeat them the largest number of times), to maintain or…	More than 60 minutes	4-5 days	Yes	5-10 minutes	Yes	Stretches and joint mobility	To enter active and concentrated to the court		During the initial warm-up, During the break between halves, At the end of the game
2021-10-02 01:31:13	Yes	32	Men	190	90	Murcia	Regional, National	Regional (13 years) National (5 years)	2020-2021	Senior category, Youth categories	Between 3 and 4 games/week	Group 3 (EBA League and Women's League 2)	Yes	No	To maintain or develop aerobic resistance (swimming, cycling, career, jumping, etc.), to maintain or develop muscle strength (different muscle strengthening techniques with machines, with free weight, with body weight itself, with elastic gums, etc.), to maintain or develop speed (ability to perform sprints in the shortest possible time and repeat them the largest number of times)	Between 30 and 45 minutes	4-5 days	Yes	5 minutes	No			I understand that my body is still active after 10 minutes of rest	During the initial warm-up
2021-10-02 01:50:39	Yes	32	Men	178	72	ALMERÍA, ALMERÍA	National	Local 11 years, Regional 6 years, National 3 years	2020-2021	Senior category	Between 1 and 2 games/week	FEB, Group 3	Yes	No	To maintain or develop aerobic resistance (swimming, cycling, career, jumping, etc.), to maintain or develop muscle strength (different muscle strengthening techniques with machines, with free weight, with body weight itself, with elastic gums, etc.), to maintain or develop speed (ability to perform sprints in the shortest possible time and repeat them the largest number of times), to maintain or…	Between 45 and 60 minutes	4-5 days	Yes	10-15 minutes	Yes	Jog or run, Stretches and joint mobility	To go on court with the high heart rate again		During the initial warm-up, At the end of the game		Thank you
2021-10-02 08:56:09	Yes	32	Men	189	85	Torrejón de Ardoz	Regional, National	Regional (6 years), National (6 years)	2020-2021	Senior category	1 game/week	Group 1 Feb	Yes	No	To maintain or develop aerobic resistance (swimming, cycling, career, jumping, etc.), to maintain or develop muscle strength (different muscle strengthening techniques with machines, with free weight, with body weight itself, with elastic rubber, etc.)	Between 45 and 60 minutes	2-3 days	Yes	5-10 minutes	No			I have never done it (routine)	During the initial warm-up
2021-10-02 09:15:13	Yes	33	Men	180	75	Beniarjo (VALENCIA)	Local, Regional, National	Local (12 years) Regional (11 years) National (5 years)	2020-2021	Senior category, Youth categories	Between 4 and 5 games/week	Group 3	Yes	No	To maintain or develop aerobic resistance (swimming, cycling, career, jumping, etc.), to maintain or develop muscle strength (different muscle strengthening techniques with machines, with free weight, with body weight itself, with elastic rubber, etc.)	Between 45 and 60 minutes	4-5 days	Yes	10-15 minutes	No			Due to lack of time	During the initial warm-up, At the end of the game
2021-10-02 10:11:23	Yes	35	Men	179	86	Barcelona	National	Regional (15 years), National (4 years)	2018-2019	Senior category	Between 1 and 2 games/week	Group 2 Feb	Yes	Yes	To maintain or develop muscle strength (different muscle strengthening techniques with machines, with free weight, with body weight itself, with elastic rubber, etc.), to maintain or develop other abilities (coordination, balance, agility)	Between 45 and 60 minutes	2-3 days	Yes	15 minutes	Yes	Stretches and joint mobility, Breath management techniques (activation/relaxation, awareness)	The main reason is to return to the court at 100% and prevent injuries		During the initial warm-up, During the break between halves, At the end of the game
2021-10-02 10:20:17	Yes	29	Men	185	75	Murcia	Local, Regional, National	Local 5 regional 3 National 1	2018-2019	Senior category	Between 3 and 4 games/week	1 division	Yes	No	To maintain or develop aerobic resistance (swimming, cycling, career, jumping, etc.)	Between 45 and 60 minutes	2-3 days	Yes	3 to 5 minutes	No				Never
2021-10-02 11:17:45	Yes	35	Men	180	85	Barcelona	National	Local 16 years, Regional 14 years, National 6 years, International without exp.	2019-2020	Senior category, Youth categories	Between 2 and 3 games/week	FEB G3, Autonomics (19/20)	Yes	No	To maintain or develop aerobic resistance (swimming, cycling, career, jumping, etc.), to maintain or develop muscle strength (different muscle strengthening techniques with machines, with free weight, with body weight itself, with elastic gums, etc.), to maintain or develop speed (ability to perform sprints in the shortest possible time and repeat them the largest number of times)	Between 45 and 60 minutes	4-5 days	Yes		No	Jog or run		Little time	During the initial warm-up
2021-10-02 11:36:53	Yes	47	Men	179	81	Málaga	Local	7 years	2019-2020	Youth categories	Between 2 and 3 games/week	Provincial	Yes	No	To maintain or develop aerobic resistance (swimming, cycling, career, jumping, etc.)	More than 60 minutes	6-7 days	Yes	5 minutes	Yes	Stretches and joint mobility	To avoid cooling		During the initial warm-up, During the break between halves
2021-10-02 11:39:19	Yes	32	Men	185	90	Madrid	National	Local 4 years, Regional 3 years, National 7	2019-2020	Senior category	Between 2 and 3 games/week	FEB GROUP 3 (EBA)	Yes	No	To maintain or develop aerobic resistance (swimming, cycling, career, jumping, etc.), to maintain or develop muscle strength (different muscle strengthening techniques with machines, with free weight, with body weight itself, with elastic gums, etc.), to maintain or develop speed (ability to perform sprints in the shortest possible time and repeat them the largest number of times), to maintain or…	Between 30 and 45 minutes	2-3 days	Yes	5-10 minutes	No			Physically I am active, in the first run I find sensations again.	During the initial warm-up, At the end of the game
2021-10-02 12:07:14	Yes	34	Men	183	80	Marchamalo, Guadalajara	National	7 years	2020-2021	Senior category	1 game/week	Group 3	Yes	Yes	To maintain or develop aerobic resistance (swimming, cycling, career, jumping, etc.)	Between 45 and 60 minutes	2-3 days	Yes	10 minutes	No				During the initial warm-up
2021-10-02 13:52:20	Yes	27	Men	171	65	Palma de mallorca, baleares	Local, Regional, National	7,7,3, without experience	2020-2021	Senior category	Between 3 and 4 games/week	3	Yes	No	To maintain or develop aerobic resistance (swimming, cycling, career, jumping, etc.), to maintain or develop muscle strength (different muscle strengthening techniques with machines, with free weight, with body weight itself, with elastic rubber, etc.)	Between 30 and 45 minutes	2-3 days	Yes	5-10 minutes	Yes	Breath management techniques (activation/relaxation, awareness)	Start concentrated		During the initial warm-up, At the end of the game
2021-10-03 08:49:24	Yes	26	Men	174	71	Alicante	Local, Regional, National	Local (1year) Regional (3years) National(1year) International(0years)	2020-2021	Senior category	Between 6 and 7 games/week	Group 3 Feb	Yes	Yes	To maintain or develop aerobic resistance (swimming, cycling, career, jumping, etc.), to maintain or develop muscle strength (different muscle strengthening techniques with machines, with free weight, with body weight itself, with elastic gums, etc.), to maintain or develop speed (ability to perform sprints in the shortest possible time and repeat them the largest number of times), to maintain or…	More than 60 minutes	4-5 days	Yes	10 minutes	Yes	Jog or run, Coordination and balance exercises, Breath management techniques (activation/relaxation, awareness)	To get active of mind and body and be able to give the maximum possible performance		During the initial warm-up, During the break between halves, At the end of the game
2021-10-03 12:21:31	Yes	34	Women	175	68	Barcelona	Regional	14 y	2017-2018	Senior category, Youth categories	Between 4 and 5 games/week	NATIONAL	Yes	No	To maintain or develop aerobic resistance (swimming, cycling, career, jumping, etc.), to maintain or develop muscle strength (different muscle strengthening techniques with machines, with free weight, with body weight itself, with elastic gums, etc.), to maintain or develop flexibility (either with the body itself, help from another person, or with elements such as towels, elastic gums, foam roll…	Between 45 and 60 minutes	2-3 days	Yes	10 minutes	No			Talk with the partner about the game, journey from the court to the locker room, and back	During the initial warm-up, At the end of the game
2021-10-03 13:14:58	Yes	34	Men	182	80	Badajoz	Local, Regional, National	Local (21 years), Regional (15 years), National (13 years)	2018-2019	Senior category, Youth categories	Between 4 and 5 games/week	FEB (Group 3)	Yes	No	To maintain or develop aerobic resistance (swimming, cycling, career, jumping, etc.), to maintain or develop muscle strength (different muscle strengthening techniques with machines, with free weight, with body weight itself, with elastic rubber, etc.)	More than 60 minutes	4-5 days	Yes	10-15 minutes	Yes	Stretches and joint mobility	Precisely the "reactivation", there is still work to be done and I cannot "disconnect" to start again form 0		During the initial warm-up, During the break between halves, At the end of the game
2021-10-03 16:53:32	Yes	41	Men	181	78	Zaragoza	Local, Regional, National	10 years (Local / Regional ) 2years (National )	2020-2021	Senior category, Youth categories	Between 3 and 4 games/week	Currently G3 (EBA and LF2 League)	Yes	Yes	To maintain or develop muscle strength (different muscle strengthening techniques with machines, with free weight, with body weight itself, with elastic rubber, etc.)	Between 45 and 60 minutes	4-5 days	No		No			I need 5 minutes of concentration on what is happening on the track (my physical preparation is a constant and weekly job)	At the end of the game
2021-10-03 21:32:48	Yes	34	Men	178	75	Lloret de mar (Girona)	Regional, National	Regional: 13 years / National: 1 year	2019-2020	Senior category	Between 3 and 4 games/week	1st autonomic	Yes	No	To maintain or develop aerobic resistance (swimming, cycling, career, jumping, etc.), to maintain or develop muscle strength (different muscle strengthening techniques with machines, with free weight, with body weight itself, with elastic rubber, etc.)	Between 45 and 60 minutes	4-5 days	Yes	10-15 minutes	No			If I don't feel physically loaded, I don't usually do it.	During the initial warm-up, At the end of the game
2021-10-03 22:19:55	Yes	29	Women	164	57	Sevilla	Regional, National	Regional (5 years) National (2 years)	2018-2019	Senior category, Youth categories	Between 5 and 6 games/week	Autonomous	Yes	No	To maintain or develop aerobic resistance (swimming, cycling, career, jumping, etc.), to maintain or develop muscle strength (different muscle strengthening techniques with machines, with free weight, with body weight itself, with elastic rubber, etc.)	Between 45 and 60 minutes	4-5 days	Yes	10-15 minutes	No			We are going to locker rooms, you comment aspects of the game with the partner and, finally, there is only time to perform a couple of sprint	During the initial warm-up, At the end of the game
2021-10-03 22:39:56	Yes	27	Men	180	85	Sabra Cruz de Tenerife	Local, Regional, National	Local (2 years), Regional (3 years), National (4 years)	2020-2021	Senior category	1 game/week	Group 2 Feb	Yes	Yes	To maintain or develop aerobic resistance (swimming, cycling, career, jumping, etc.), to maintain or develop muscle strength (different muscle strengthening techniques with machines, with free weight, with body weight itself, with elastic gums, etc.), to maintain or develop other capacities (coordination, balance, agility)	Between 45 and 60 minutes	2-3 days	No		No			I had never thought about	During the initial warm-up, At the end of the game
2021-10-03 23:51:23	Yes	49	Men	187	81	Canillo(Andorra)	Regional, National, International	Regional (4 years), National (29 years), International(10 years)	2018-2019	Senior category	Between 1 and 2 games/week	FEB Group 1	Yes	No	To maintain or develop aerobic resistance (swimming, cycling, career, jumped to the commons, etc.), to maintain or develop speed (ability to perform sprints in the shortest possible time and repeat them the greatest number of times), for maintain or develop flexibility (either with the body itself, help from another person, or with elements such as towels, elastic rubber, foam roller, etc.)	Between 45 and 60 minutes	2-3 days	No		No				During the initial warm-up, At the end of the game
2021-10-04 01:53:00	Yes	37	Men	188	87	Madrid	Regional, National	Regional (5 years) National (4 years)	2020-2021	Senior category	Between 1 and 2 games/week	FEB Group 1	Yes	No	To maintain or develop aerobic resistance (swimming, cycling, career, jumping, etc.), to maintain or develop muscle strength (different muscle strengthening techniques with machines, with free weight, with body weight itself, with elastic rubber, etc.)	More than 60 minutes	4-5 days	Yes	5-10 minutes	No			I take this opportunity to rest mentally and share impressions with my colleagues more than a physical activation, beyond a "little sprint" to go to the area I am at the beginning of the third quarter	During the initial warm-up
2021-10-04 08:57:41	Yes	33	Women	180	68	Zaragoza	National	Regional 3, National 5	2020-2021	Senior category	1 game/week	Group 1	Yes	No	To maintain or develop aerobic resistance (swimming, cycling, career, jumping, etc.), to maintain or develop muscle strength (different muscle strengthening techniques with machines, with free weight, with body weight itself, with elastic rubber, etc.)	Between 30 and 45 minutes	2-3 days	No		No			I have never considered it, I have not felt the need to do it.	During the initial warm-up, At the end of the game
2021-10-04 11:54:03	Yes	39	Men	190	88	Barcelona	Local, Regional, National	Regional (6 years), National (4 years), International (without experience)	2020-2021	Senior category, Youth categories	Between 2 and 3 games/week	Group 3 Feb (EBA Liga and Women's League 2)	Yes	No	To maintain or develop aerobic resistance (swimming, cycling, career, jumping, etc.), to maintain or develop muscle strength (different muscle strengthening techniques with machines, with free weight, with body weight itself, with elastic rubber, etc.)	Between 15 and 30 minutes	2-3 days	Yes	Between 5 and 10 minutes	No			I don't have the habit of doing so.	During the initial warm-up, At the end of the game
2021-10-04 12:40:59	Yes	49	Men	175	75	Castro Urdiales	National	20 y	2020-2021	Senior category	1 game/week	Group 1	Yes	No	To maintain or develop aerobic resistance (swimming, cycling, career, jumping, etc.)	Between 30 and 45 minutes	2-3 days	Yes	5 minutes	No			Lack of habit	During the initial warm-up
2021-10-04 12:51:01	Yes	2	Men	178	70	Soria	National	Local (15 years) Regional (10 years) National (7 years)	2019-2020	Senior category, Youth categories	Between 1 and 2 games/week	FEB Group 2 + Auntonomica	Yes	No	To maintain or develop aerobic resistance (swimming, cycling, career, jumped to the commits, etc.), to maintain or develop speed (ability to perform sprints in the shortest possible time and repeat them the largest number of times)	Between 45 and 60 minutes	2-3 days	Yes	10 minutes	Yes	Other	Need to activate again		During the initial warm-up, At the end of the game
2021-10-04 13:43:23	Yes	25	Men	185	79.5	Zaragoza	Regional, National	Regional 8 years and National 3 years	2020-2021	Senior category	1 game/week	Group 3 Feb	Yes	No	To maintain or develop aerobic resistance (swimming, cycling, career, jumping, etc.), to maintain or develop muscle strength (different muscle strengthening techniques with machines, with free weight, with body weight itself, with elastic gums, etc.), to maintain or develop other capacities (coordination, balance, agility)	More than 60 minutes	4-5 days	Yes	10 minutes	No			I am focused on talking to the partner.	During the initial warm-up, At the end of the game
2021-10-04 17:08:58	Yes	29	Women	170	65	Barcelona	Local, Regional, National, International	Local/Regional (10 years) National (5 years) International (1 year)	2020-2021	Senior category	Between 1 and 2 games/week	Group 1 Feb	Yes	Yes	To maintain or develop muscle strength (different muscle strengthening techniques with machines, with free weight, with body weight itself, with elastic rubber, etc.), to maintain or develop speed (ability to perform sprints in the shortest possible time possible and to repeat them the greatest number of times), to maintain or develop flexibility (either with the body itself, help from another pe…	Between 45 and 60 minutes	4-5 days	Yes	10-15 minutes	No			I wouldn't know what exercises to do to get active. I notice that it is necessary but I don't know what I should do.	During the initial warm-up, At the end of the game
2021-10-04 17:27:09	Yes	28	Men	185	86	Barcelona, Barcelona	Local, Regional, National	Local (4 years), Regional (3years), National (5 years)	2019-2020	Senior category	Between 1 and 2 games/week	FEB, G1	Yes	No	To maintain or develop muscle strength (different muscle strengthening techniques with machines, with free weight, with body weight itself, with elastic rubber, etc.), to maintain or develop flexibility (either with the body itself, help from Another person, or with elements such as towels, elastic tires, foam roller, etc.)	More than 60 minutes	4-5 days	Yes	5-7 minutes	No			Routine	At the end of the game
2021-10-04 17:32:51	Yes	30	Men	192	75	Gijón (Asturias)	Local, Regional, National	Local and Regional (11years) National (6 years)	2019-2020	Senior category, Youth categories	Between 2 and 3 games/week	Endesa Women's League and Leb Gold	Yes	Yes	To maintain or develop aerobic resistance (swimming, cycling, career, jumping, etc.), to maintain or develop muscle strength (different muscle strengthening techniques with machines, with free weight, with body weight itself, with elastic gums, etc.), to maintain or develop speed (ability to perform sprints in the shortest possible time and repeat them the largest number of times), to maintain or…	Between 45 and 60 minutes	2-3 days	Yes	Approximately 10 minutes	Yes	Stretches and joint mobility	To be active from the first second		During the initial warm-up, During the break between halves, At the end of the game
2021-10-04 19:14:51	Yes	34	Men	173	70	Barcelona	National	Regional (10 years), National (2years), International (without experience)	2019-2020	Senior category	Between 2 and 3 games/week	Group 3	Yes	No	To maintain or develop aerobic resistance (swimming, cycling, career, jumping, etc.), to maintain or develop muscle strength (different muscle strengthening techniques with machines, with free weight, with body weight itself, with elastic rubber, etc.)	More than 60 minutes	4-5 days	No		No			I had not taken it into account	During the initial warm-up
2021-10-04 19:28:05	Yes	32	Men	177	69	Guadix - Granada	Local, Regional, National	5 Local / 1 Regional / 5 National	2018-2019	Senior category	Between 1 and 2 games/week	Group 3	Yes	No	To maintain or develop aerobic resistance (swimming, cycling, career, jumping, etc.), to maintain or develop muscle strength (different muscle strengthening techniques with machines, with free weight, with body weight itself, with elastic gums, etc.), to maintain or develop flexibility (either with the body, help from another person, or with elements such as towels, elastic rubber, foam roller, e…	More than 60 minutes	4-5 days	Yes	Between 10 and 15 minutes	Yes	Jog or run, Stretches and joint mobility, Coordination and balance exercises			During the break between halves, At the end of the game
2021-10-04 21:33:11	Yes	37	Men	185	80	Miranda de ebro, burgos	National	Local (1year) regional (3 years) National (11 years)	2019-2020	Senior category	Between 2 and 3 games/week	Group 1 Feb	Yes	No	To maintain or develop aerobic resistance (swimming, cycling, career, jumping, etc.), to maintain or develop muscle strength (different muscle strengthening techniques with machines, with free weight, with body weight itself, with elastic gums, etc.), to maintain or develop flexibility (either with the body itself, help from another person, or with elements such as towels, elastic gums, foam roll…	Between 45 and 60 minutes	4-5 days	Yes	5-10 minutes	Yes	Stretches and joint mobility	Not being cold after such a radical break for just over 15min		During the break between halves, At the end of the game
2021-10-04 22:26:19	Yes	31	Men	185	80	Madrid	Local, Regional, National	Local and Regional (15 years), National (7years)	2018-2019	Senior category	Between 3 and 4 games/week	Group 2 (EBA and LF2)	Yes	No	To maintain or develop muscle strength (different muscle strengthening techniques with machines, with free weight, with body weight itself, with elastic rubber, etc.)	Between 45 and 60 minutes	4-5 days	No		No			I give preference to mental reactivation, not lose concentration, the physical aspect goes to the background.	At the end of the game
2021-10-04 23:02:15	Yes	41	Men	179	86.5	Valladolid	Local, Regional, National	26 years (3 local,3 Regional, 20 National)	2019-2020	Senior category, Youth categories	Between 2 and 3 games/week	Group 3 EBA League	Yes	No	To maintain or develop aerobic resistance (swimming, cycling, career, jumped to the commits, etc.), to maintain or develop speed (ability to perform sprints in the shortest possible time and repeat them the largest number of times)	Between 45 and 60 minutes	2-3 days	No		No			Lack of time and habit	During the initial warm-up, At the break between the third and last quarter, At the end of the game
2021-10-05 15:32:55	Yes	32	Men	184	84	SALAMANCA	National	Local - 1, Regional - 8, National - 4	2019-2020	Senior category, Youth categories	Between 3 and 4 games/week	FEB Group 3, Autonomic and 1 Female Division	Yes	No	To maintain or develop aerobic resistance (swimming, cycling, career, jumping, etc.), to maintain or develop muscle strength (different muscle strengthening techniques with machines, with free weight, with body weight itself, with elastic rubber, etc.)	More than 60 minutes	4-5 days	Yes	10 minutes	No			Because I don't take it into account, today (and past seasons) I am well physically, I don't need reactivation. And just as players also rest, I consider it correct that the referees in those 10 min also do so	During the initial warm-up, At the end of the game
2021-10-05 17:09:38	Yes	34	Men	175	91	Armilla, Granada	Local, Regional	Local 13, Regional 10	2019-2020	Senior category, Youth categories	Between 5 and 6 games/week	Provincial	Yes	No	To maintain or develop aerobic resistance (swimming, cycling, career, jumping, etc.), to maintain or develop muscle strength (different muscle strengthening techniques with machines, with free weight, with body weight itself, with elastic rubber, etc.)	Between 45 and 60 minutes	2-3 days	Yes	10-15 minutes	No			Lack of routine/time on some occasions	During the initial warm-up, At the end of the game
2021-10-05 21:22:28	Yes	30	Men	176	73	Cádiz	Local, Regional, National	Local and Regional (12 years); National (4 years)	2018-2019	Senior category	1 game/week	FEB Group 2	Yes	No	To maintain or develop aerobic resistance (swimming, cycling, career, jumping, etc.), to maintain or develop muscle strength (different muscle strengthening techniques with machines, with free weight, with body weight itself, with elastic rubber, etc.)	More than 60 minutes	4-5 days	Yes	3 minutes	No			Lack of time	During the initial warm-up
2021-10-06 03:05:56	Yes	28	Men	173	74	Las Palmas de Gran Canaria	Local, Regional, National	Local (4 years) Regional (3 years) National (1 year) International (without experience)	2018-2019	Senior category	Between 5 and 6 games/week	Canarian Autonomous Federation	Yes	No	To maintain or develop muscle strength (different muscle strengthening techniques with machines, with free weight, with body weight itself, with elastic rubber, etc.), to maintain or develop speed (ability to perform sprints in the shortest possible time possible and repeat them the greatest number of times)	Between 45 and 60 minutes	4-5 days	Yes	5-10 minutes	Yes	Jog or run, Stretches and joint mobility, Breath management techniques (activation/relaxation, awareness)	Not to go cold to the second half and that the body and mind remain active and concentrated during the break. Avoid disconnection		During the initial warm-up, During the break between halves
2021-10-07 15:06:05	Yes	29	Men	185	95	Valladolid	Local, Regional, National	Local (9 years), Regional (6 years), National (1 year)	2020-2021	Senior category, Youth categories	Between 3 and 4 games/week	Provincial, Autonomous, Farm Nacional Female	Yes	No	To maintain or develop aerobic resistance (swimming, cycling, career, jumping, etc.), to maintain or develop muscle strength (different muscle strengthening techniques with machines, with free weight, with body weight itself, with elastic gums, etc.), to maintain or develop speed (ability to perform sprints in the shortest possible time and repeat them the largest number of times)	Between 45 and 60 minutes	4-5 days	Yes	5-10 minutes	No	Jog or run, Running at maximum speed (sprinting), Stretches and joint mobility		Necessary time to perform this reactivation	During the initial warm-up
2021-10-07 15:06:28	Yes	31	Men	200	96	PALENCIA, PALENCIA	Local, Regional	11 years Local and Regional	2020-2021	Senior category, Youth categories	Between 3 and 4 games/week	Female regional and national	Yes	Yes	To maintain or develop aerobic resistance (swimming, cycling, career, jumping, etc.), to maintain or develop muscle strength (different muscle strengthening techniques with machines, with free weight, with body weight itself, with elastic gums, etc.), to maintain or develop speed (ability to perform sprints in the shortest possible time and repeat them the largest number of times), to maintain or…	Between 45 and 60 minutes	4-5 days	Yes	5–10 minutes	Yes	Stretches and joint mobility, Breath management techniques (activation/relaxation, awareness)	Not to be stopped and be able to return to the game in the best conditions		During the initial warm-up, During the break between halves
2021-10-07 15:11:01	Yes	20	Men	179	62	Burgos	Local, Regional, National	Local (3 years) regional (3 years) National (2 years)	2019-2020	Senior category, Youth categories	Between 5 and 6 games/week	1st Female National	Yes	No	To maintain or develop aerobic resistance (swimming, cycling, career, jumping, etc.)	Between 45 and 60 minutes	2-3 days	Yes	3 minutes	No			There is almost no time	During the initial warm-up, During the break between halves, At the end of the game
2021-10-07 15:11:42	Yes	31	Men	193	83	Soria	Regional	Local (5 years), Regional (4 years)	2018-2019	Youth categories	Between 3 and 4 games/week	Autonomous	Yes	No	To maintain or develop aerobic resistance (swimming, cycling, career, jumping, etc.), to maintain or develop muscle strength (different muscle strengthening techniques with machines, with free weight, with body weight itself, with elastic gums, etc.), to maintain or develop speed (ability to perform sprints in the shortest possible time and repeat them the largest number of times), to maintain or…	More than 60 minutes	6-7 days	Yes	10-15 minutes	No			Short period of time (less than 10 minutes)	During the initial warm-up, At the end of the game
2021-10-07 15:14:52	Yes	23	Men	176	73	Valladolid	Local, Regional	Local (4 years) regional (1 year)	2018-2019	Youth categories	Between 2 and 3 games/week	Valladolid School League	Yes	No	To maintain or develop aerobic resistance (swimming, cycling, career, jumping, etc.), to maintain or develop muscle strength (different muscle strengthening techniques with machines, with free weight, with body weight itself, with elastic rubber, etc.)	More than 60 minutes	2-3 days	Yes	15-20 minutes	No	Jog or run, Running at maximum speed (sprinting), Stretches and joint mobility			During the initial warm-up, At the end of the game
2021-10-07 15:16:29	Yes	25	Men	186	80	Valladolid	Local, Regional, National	Local 6, Regional 4, National 2, International 0	2020-2021	Senior category, Youth categories	Between 4 and 5 games/week	1st female	Yes	No	To maintain or develop aerobic resistance (swimming, cycling, career, jumping, etc.), to maintain or develop muscle strength (different muscle strengthening techniques with machines, with free weight, with body weight itself, with elastic rubber, etc.)	Between 45 and 60 minutes	6-7 days	Yes	3-5 minutes	No			There is no need	During the initial warm-up, At the end of the game
2021-10-07 15:21:18	Yes	46	Men	180	70	Valladolid	Local, Regional, National	Local (5), Regional (17), National (4)	2018-2019	Senior category	Between 3 and 4 games/week	Cyl	Yes	Yes	To maintain or develop aerobic resistance (swimming, cycling, career, jumping, etc.), to maintain or develop muscle strength (different muscle strengthening techniques with machines, with free weight, with body weight itself, with elastic gums, etc.), to maintain or develop speed (ability to perform sprints in the shortest possible time and repeat them the largest number of times)	More than 60 minutes	6-7 days	Yes	10-15 minutes	Yes	Breath management techniques (activation/relaxation, awareness), Other	Rise again the concentration level		During the initial warm-up, At the end of the game
2021-10-07 15:37:58	Yes	40	Men	191	96	Valladolid	Local, Regional	Local 6 years Regional 5 years	2020-2021	Senior category, Youth categories	Between 2 and 3 games/week	1 female division, from Junior to Autonomic Children	Yes	No	To maintain or develop aerobic resistance (swimming, cycling, career, jumping, etc.)	More than 60 minutes	2-3 days	No		Yes	Stretches and joint mobility	Stretching		During the initial warm-up, During the break between halves
2021-10-07 16:19:02	Yes	27	Men	183	65	Salamanca	Local, Regional	Local (7 years), Regional (4 years)	2018-2019	Senior category, Youth categories	Between 4 and 5 games/week	Local and autonomic	Yes	No	To maintain or develop aerobic resistance (swimming, cycling, career, jumped to the commits, etc.), to maintain or develop speed (ability to perform sprints in the shortest possible time and repeat them the largest number of times)	Between 45 and 60 minutes	2-3 days	Yes	7-10 minutes	No			I had never considered it, I may do so from now on.	During the initial warm-up, At the end of the game
2021-10-07 16:33:09	Yes	38	Men	192	90	Palencia	Local, Regional, National	Local 8 years, Regional 8 years, National 1 game, International without experience	2018-2019	Youth categories	Between 2 and 3 games/week	Autonomics, 2018-2019	No					Yes	15 minutes	No			The reason is to analyze the 2 previous quarters	During the initial warm-up
2021-10-07 16:40:38	Yes	27	Men	184	79	Salamanca	Regional, National	10 y	2020-2021	Senior category	Between 2 and 3 games/week	First male, first feminine and regional	Yes	No	To maintain or develop aerobic resistance (swimming, cycling, career, jumping, etc.), to maintain or develop muscle strength (different muscle strengthening techniques with machines, with free weight, with body weight itself, with elastic gums, etc.), to maintain or develop speed (ability to perform sprints in the shortest possible time and repeat them the largest number of times), to maintain or…	More than 60 minutes	6-7 days	Yes	15-20 minutes	No				During the initial warm-up, At the end of the game
2021-10-07 16:41:01	Yes	28	Men	187	85	Palencia	Local, Regional	Local (4 years), Regional (3 years)	2019-2020	Senior category, Youth categories	Between 2 and 3 games/week	1st male national, 1st female national, lower categories.	Yes	No	To maintain or develop muscle strength (different muscle strengthening techniques with machines, with free weight, with body weight itself, with elastic rubber, etc.), to maintain or develop speed (ability to perform sprints in the shortest possible time possible and to repeat them the greatest number of times), to maintain or develop flexibility (either with the body itself, help from another pe…	More than 60 minutes	4-5 days	Yes	5 to 8 minutes	Yes	Breath management techniques (activation/relaxation, awareness)	Not to be affected and thus, avoid impairment in my decisions.		During the initial warm-up
2021-10-07 17:49:47	Yes	21	Men	183	81	Palencia	Regional	Regional (4 years)	2020-2021	Senior category	Between 2 and 3 games/week	Autonomic (2017-2019), 1st Women's and Autonomous National (2019 - 2020) and 1st Male National and Female, as well as autonomic (2020 - 2021)	No	No				Yes	10 minutes	Yes	Jog or run, Stretches and joint mobility	Do not enter to the game after the break in a cold condition. The players have their warm-up during the break, the referees must have "ours".		During the initial warm-up, During the break between halves
2021-10-07 19:17:45	Yes	21	Men	188	77	León	Local, Regional, National	Local (4 years), Regional (3 years), National(1 year), International (without experience)	2018-2019	Youth categories	Between 2 and 3 games/week	In the 2018-2019 season it arbitrated lower categories from Alevin to Junior	Yes	No	To maintain or develop aerobic resistance (swimming, cycling, career, jumping, etc.), to maintain or develop muscle strength (different muscle strengthening techniques with machines, with free weight, with body weight itself, with elastic gums, etc.), to maintain or develop speed (ability to perform sprints in the shortest possible time and repeat them the largest number of times), to maintain or…	More than 60 minutes	4-5 days	Yes	Between 10 and 15 minutes to warm-up and activate the body for activity	Yes	Stretches and joint mobility	Not to lose the activation of the body and avoid possible injuries		During the initial warm-up, During the break between halves, At the end of the game
2021-10-07 19:46:40	Yes	22	Men	180	75	Valladolid	Local, Regional, National	Local (5 years), regional (3 years), National (2 years), International ( without experience)	2018-2019	Youth categories	Between 4 and 5 games/week	Youth Autonomics	Yes	No	To maintain or develop muscle strength (different muscle strengthening techniques with machines, with free weight, with body weight itself, with elastic rubber, etc.), to maintain or develop speed (ability to perform sprints in the shortest possible time possible and repeat them the greatest number of times)	More than 60 minutes	2-3 days	Yes	5 - 7 minutes	No			I do not need it	During the initial warm-up, During the break between halves
2021-10-07 19:49:47	Yes	21	Men	181	75	Soria	Local, Regional, National	Local (4 years), Regional (3 years), National (1 year)	2020-2021	Youth categories	Between 3 and 4 games/week	Junior, Cadet and Children	Yes	No	To maintain or develop aerobic resistance (swimming, cycling, career, jumping, etc.), to maintain or develop muscle strength (different muscle strengthening techniques with machines, with free weight, with body weight itself, with elastic rubber, etc.)	Between 45 and 60 minutes	4-5 days	No		No			The physical exercise required to officiate does not seem too much, so I do not usually warm-up or reactivate during the break	At the end of the game
2021-10-07 19:53:55	Yes	22	Men	180	84	La Bañeza	Local, Regional	3 y	2018-2019	Senior category, Youth categories	Between 2 and 3 games/week	Autonomical	Yes	No	To maintain or develop muscle strength (different muscle strengthening techniques with machines, with free weight, with body weight itself, with elastic rubber, etc.)	Between 45 and 60 minutes	2-3 days	No		No			Rest physically	During the initial warm-up, During the break between halves
2021-10-07 19:55:50	Yes	33	Women	200	90	León	Local	1 year	2018-2019	Youth categories	1 game/week	School	Yes	No	To maintain or develop aerobic resistance (swimming, cycling, career, jumping, etc.), to maintain or develop muscle strength (different muscle strengthening techniques with machines, with free weight, with body weight itself, with elastic gums, etc.), to maintain or develop speed (ability to perform sprints in the shortest possible time and repeat them the largest number of times), to maintain or…	Between 30 and 45 minutes	4-5 days	Yes	Stretching	Yes	Stretches and joint mobility, Breath management techniques (activation/relaxation, awareness)	Muscle reactivation		During the initial warm-up, During the break between halves, At the end of the game
2021-10-07 19:57:24	Yes	21	Women	156	51	León	Local, Regional	Local (5 years), Regional (4 years)	2018-2019	Senior category, Youth categories	Between 6 and 7 games/week	Local, special and preferential regional	Yes	No	To maintain or develop aerobic resistance (swimming, cycling, career, jumping, etc.), to maintain or develop muscle strength (different muscle strengthening techniques with machines, with free weight, with body weight itself, with elastic gums, etc.), to maintain or develop other capacities (coordination, balance, agility)	More than 60 minutes	4-5 days	Yes	5-10 minutes	Yes	Breath management techniques (activation/relaxation, awareness)	Knowing how to control my breathing helps me to relax mentally and at the same time to reactivate again physically and mentally before returning to the court. This will be important to endure the rest of the game and maintain the necessary attention towards the game		During the initial warm-up, At the end of the game
2021-10-07 19:57:33	Yes	20	Men	187	70	Valladolid	Local, Regional	Local 3 years, Regional 1 year	2019-2020	Youth categories	1 game/week	Children's, male and female regional cadet	Yes	No	To maintain or develop aerobic resistance (swimming, cycling, career, jumping, etc.), to maintain or develop muscle strength (different muscle strengthening techniques with machines, with free weight, with body weight itself, with elastic rubber, etc.)	More than 60 minutes	4-5 days	Yes	4-6 minutes	No			Because I find myself in a position to physically meet if necessary.	At the end of the game
2021-10-07 19:59:01	Yes	32	Men	165	64	León	Regional, National	Regional 15 years.	2019-2020	Senior category, Youth categories	Between 3 and 4 games/week	Autonomic	Yes	No	To maintain or develop aerobic resistance (swimming, cycling, career, jumping, etc.), to maintain or develop muscle strength (different muscle strengthening techniques with machines, with free weight, with body weight itself, with elastic rubber, etc.)	Between 45 and 60 minutes	2-3 days	Yes	5 minutes	No				During the initial warm-up
2021-10-07 20:00:24	Yes	55	Men	185	80	Trobajo del Camino - León	Regional	Regional (10 years)	2020-2021	Senior category	Between 2 and 3 games/week	regional/regional	Yes	No	To maintain or develop aerobic resistance (swimming, cycling, career, jumping, etc.)	Between 30 and 45 minutes	4-5 days	Yes	10-15 minutes	Yes	Stretches and joint mobility	Maintenance and activation		During the initial warm-up, During the break between halves, At the end of the game		Thank you very much for the activity.
2021-10-07 20:04:20	Yes	50	Men	180	75	Soria	Local, Regional	Local 7 years, regional 6 years	2018-2019	Youth categories	Between 2 and 3 games/week	Autonomics	Yes	No	To maintain or develop aerobic resistance (swimming, cycling, career, jumping, etc.), to maintain or develop muscle strength (different muscle strengthening techniques with machines, with free weight, with body weight itself, with elastic rubber, etc.)	Between 30 and 45 minutes	4-5 days	Yes	4-5 minutes	No				At the end of the game
2021-10-07 21:28:07	Yes	43	Men	172	60	Leon (León)	Regional	8 years	2018-2019	Senior category, Youth categories	Between 4 and 5 games/week	Autonomic	Yes	No	To maintain or develop aerobic resistance (swimming, cycling, career, jumping, etc.), to maintain or develop muscle strength (different muscle strengthening techniques with machines, with free weight, with body weight itself, with elastic gums, etc.), to maintain or develop speed (ability to perform sprints in the shortest possible time and repeat them the largest number of times), to maintain or…	More than 60 minutes	4-5 days	Yes	10 minutes	No	Stretches and joint mobility	I stretch because it prevents pulls	I do nothing else because the body also needs its breaks	During the initial warm-up, During the break between halves, At the end of the game
2021-10-07 21:41:04	Yes	50	Men	181	91	León	Regional	Regional (12 years )	2018-2019	Senior category	Between 2 and 3 games/week	Autonomics	No	No	To maintain or develop aerobic resistance (swimming, cycling, career, jumping, etc.)	Between 15 and 30 minutes	2-3 days	Yes	5-10 minutes	No			Little importance	During the initial warm-up		Thank you very much for giving us importance and I hope I contribute to your study
2021-10-07 22:07:32	Yes	27	Men	187	83	León	Regional	Local (2 years), Regional (4 years)	2018-2019	Senior category	Between 4 and 5 games/week	1st masculine fbcyl	Yes	No	To maintain or develop aerobic resistance (swimming, cycling, career, jumping, etc.), to maintain or develop muscle strength (different muscle strengthening techniques with machines, with free weight, with body weight itself, with elastic gums, etc.), to maintain or develop speed (ability to perform sprints in the shortest possible time and repeat them the largest number of times)	More than 60 minutes	2-3 days	Yes	10-15 minutes	No			Rest and many times we focus on aspects of the game to take into account, the situations that create problems ...	During the initial warm-up, At the end of the game
2021-10-08 10:06:45	Yes	36	Men	182	76	Bilbao, Bizkaia	Local, Regional, National, International	Local (3 years), regional (5years), National (9years), International (3 years)	2018-2019	Senior category	1 game/week	ACB, FIBA	Yes	No	To maintain or develop muscle strength (different muscle strengthening techniques with machines, with free weight, with body weight itself, with elastic rubber, etc.)	Between 45 and 60 minutes	4-5 days	Yes	5 minutes	Yes	Jog or run, Running at maximum speed (sprinting)	I am cold, and helps me to concentrate again		During the initial warm-up
2021-10-08 21:18:00	Yes	36	Men	191	106	Tarragona	International	Local (3 years) Regional (7) National (5) International (1)	2020-2021	Senior category	1 game/week	ACB	Yes	No	To maintain or develop aerobic resistance (swimming, cycling, career, jumping, etc.), to maintain or develop muscle strength (different muscle strengthening techniques with machines, with free weight, with body weight itself, with elastic gums, etc.), to maintain or develop speed (ability to perform sprints in the shortest possible time and repeat them the largest number of times), to maintain or…	More than 60 minutes	2-3 days	Yes	5-10 minutes	No	Jog or run, Running at maximum speed (sprinting), Strength exercise (jumps, push-ups, etc.)		It is very uncommon	During the initial warm-up		Thanks for this type of studies! All the best
2021-10-29 13:08:19	Yes	47	Men	175	82	Barcelona	Regional	30 y	2018-2019	Senior category	Between 1 and 2 games/week	1st Catalan	Yes	No	To maintain or develop aerobic resistance (swimming, cycling, career, jumped to the commits, etc.), to maintain or develop speed (ability to perform sprints in the shortest possible time and repeat them the largest number of times)	Between 30 and 45 minutes	2-3 days	Yes	10 minutes	Yes	Stretches and joint mobility	Fatigue		During the break between halves, At the end of the game
2021-10-29 13:09:10	Yes	21	Men	180	78	Badalona, Barcelona	Local	Local(2years)	2020-2021	Youth categories	Between 3 and 4 games/week	Mini A, B, C	Yes	No	To maintain or develop aerobic resistance (swimming, cycling, career, jumping, etc.), to maintain or develop muscle strength (different muscle strengthening techniques with machines, with free weight, with body weight itself, with elastic gums, etc.), to maintain or develop speed (ability to perform sprints in the shortest possible time and repeat them the largest number of times)	More than 60 minutes	4-5 days	No	10 minutes	No			I stretch but I do not necessarily perform a physical routine of reactivation, since the children I referee do not have an advanced physical development	During the initial warm-up, At the end of the game
2021-10-29 13:09:26	Yes	24	Men	185	80	Reus	Local, Regional	Local (3 years), Regional (2 years),	2020-2021	Senior category, Youth categories	Between 4 and 5 games/week	B1	Yes	No	To maintain or develop aerobic resistance (swimming, cycling, career, jumping, etc.), to maintain or develop muscle strength (different muscle strengthening techniques with machines, with free weight, with body weight itself, with elastic rubber, etc.)	More than 60 minutes	2-3 days	Yes	5-10 minutes	No			I speak about the development of the first quarter	During the initial warm-up
2021-10-29 13:09:33	Yes	25	Men	190	65	Corbera de Ll. Barcelona	Local	Local - 1 year	2019-2020	Youth categories	Between 3 and 4 games/week	First school	Yes	No	To maintain or develop aerobic resistance (swimming, cycling, career, jumped to the commons, etc.), to maintain or develop speed (ability to perform sprints in the shortest possible time and repeat them the greatest number of times), for maintain or develop other capacities (coordination, balance, agility)	Between 45 and 60 minutes	2-3 days	No		No			I don't see it necessary	Never
2021-10-29 13:09:52	Yes	23	Women	172	62	Sant Adrià de Besós, Barcelona	Regional	1 year regional	2020-2021	Youth categories	Between 3 and 4 games/week	3rd school	Yes	No	To maintain or develop aerobic resistance (swimming, cycling, career, jumping, etc.), to maintain or develop muscle strength (different muscle strengthening techniques with machines, with free weight, with body weight itself, with elastic rubber, etc.)	More than 60 minutes	2-3 days	Yes	15 minutes	Yes	Stretches and joint mobility	Stretch and not sit		During the break between halves
2021-10-29 13:10:15	Yes	31	Men	185	75	Tarragona	Local	7 y	2018-2019	Senior category, Youth categories	Between 6 and 7 games/week	3rd male and second female Catalan and all those that precede them	Yes	No	To maintain or develop aerobic resistance (swimming, cycling, career, jumping, etc.), to maintain or develop muscle strength (different muscle strengthening techniques with machines, with free weight, with body weight itself, with elastic gums, etc.), to maintain or develop other capacities (coordination, balance, agility)	More than 60 minutes	6-7 days	No		No			I usually talk about technical aspects with the partner and/or check that everything is correct	During the initial warm-up
2021-10-29 13:10:47	Yes	22	Men	195	75	Tarragona	Local	Local (3 years)	2018-2019	Youth categories	Between 2 and 3 games/week	Infant and Cadet (local)	Yes	No	To maintain or develop aerobic resistance (swimming, cycling, career, jumping, etc.)	Between 30 and 45 minutes	2-3 days	No		No				During the initial warm-up
2021-10-29 13:10:51	Yes	28	Women	164	54	Badalona, Barcelona	Regional	3 y	2017-2018	Senior category, Youth categories	Between 4 and 5 games/week	B2 Committee	No	No				Yes	5 minutes	No	Stretches and joint mobility		With only 10 minutes of rest I do not see it necessary.	During the initial warm-up
2021-10-29 13:11:37	Yes	30	Men	180	100	Figueres, Girona	Local	4 years	2020-2021	Youth categories	Between 1 and 2 games/week	Territorial	Yes	No	To maintain or develop aerobic resistance (swimming, cycling, career, jumping, etc.), to maintain or develop muscle strength (different muscle strengthening techniques with machines, with free weight, with body weight itself, with elastic gums, etc.), to maintain or develop flexibility (either with the body itself, help from another person, or with elements such as towels, elastic gums, foam roll…	Between 45 and 60 minutes	6-7 days	Yes	10 minutes	No			I am activated	During the initial warm-up
2021-10-29 13:12:25	Yes	33	Men	181	88	Tarragona	Local, Regional	5 years	2019-2020	Senior category, Youth categories	Between 4 and 5 games/week	3rd Catalan	No					Yes	3-6 minutes	No			I have no reason, for a matter of time it is not possible to me	During the initial warm-up
2021-10-29 13:13:07	Yes	57	Men	191	97	Barcelona	Regional	37 regional	2018-2019	Senior category	Between 3 and 4 games/week	Autonòmica 3 Category	Yes	No	To maintain or develop aerobic resistance (swimming, cycling, career, jumped to the commits, etc.), to maintain or develop speed (ability to perform sprints in the shortest possible time and repeat them the largest number of times)	Between 15 and 30 minutes	4-5 days	Yes	10 minutes	Yes	Stretches and joint mobility	Wellness and avoid injuries		During the break between halves	I have no habit	None and thanks
2021-10-29 13:13:10	Yes	22	Men	172	75	Vilafant, Gerona	Local	Local (4 years)	2018-2019	Senior category, Youth categories	Between 4 and 5 games/week	3rd Catalan	Yes	No	To maintain or develop aerobic resistance (swimming, cycling, career, jumping, etc.)	Between 45 and 60 minutes	2-3 days	No		No			The break is 10 minutes (7 actually) because we must return to track to indicate 3 minutes before starting the second half. During these 7 minutes we go to the dressing room with the partner to talk about the game and recover strength (drink water, eat something ...)	During the initial warm-up
2021-10-29 13:13:57	Yes	35	Men	173	73	Tarragona	Local	Local (17 years)	2019-2020	Senior category, Youth categories	Between 4 and 5 games/week	B2	Yes	Yes	To maintain or develop aerobic resistance (swimming, cycling, career, jumping, etc.), to maintain or develop muscle strength (different muscle strengthening techniques with machines, with free weight, with body weight itself, with elastic gums, etc.), to maintain or develop speed (ability to perform sprints in the shortest possible time and repeat them the largest number of times), to maintain or…	More than 60 minutes	4-5 days	Yes	10 minutes	Yes	Stretches and joint mobility	Stretch limbs to avoid overloads		During the initial warm-up, During the break between halves
2021-10-29 13:14:08	Yes	34	Men	180	100	Barcelona	Local, Regional	Local 18 years	2020-2021	Senior category, Youth categories	Between 5 and 6 games/week	B2	Yes	No	To maintain or develop aerobic resistance (swimming, cycling, career, jumped to the commits, etc.), to maintain or develop speed (ability to perform sprints in the shortest possible time and repeat them the largest number of times)	Between 30 and 45 minutes	2-3 days	Yes	10 minutes	No				During the initial warm-up
2021-10-29 13:14:15	Yes	22	Men	177	70	Barcelona	Local, Regional	Local (2years), Regional (2years), National and International (without experience)	2018-2019	Youth categories	Between 1 and 2 games/week	2018-2019 School 3rd Year	Yes	No	To maintain or develop aerobic resistance (swimming, cycling, career, jumping, etc.), to maintain or develop muscle strength (different muscle strengthening techniques with machines, with free weight, with body weight itself, with elastic gums, etc.), to maintain or develop flexibility (either with the body itself, help from another person, or with elements such as towels, elastic gums, foam roll…	More than 60 minutes	6-7 days	Yes	5 minutes	Yes	Stretches and joint mobility	To activate my body again and do not catch by surprise		During the initial warm-up, During the break between halves
2021-10-29 13:14:28	Yes	22	Men	178	64	Barcelona	Local, Regional	3 years	2019-2020	Youth categories	Between 4 and 5 games/week	3rd category	Yes	No	To maintain or develop aerobic resistance (swimming, cycling, career, jumping, etc.), to maintain or develop muscle strength (different muscle strengthening techniques with machines, with free weight, with body weight itself, with elastic rubber, etc.)	More than 60 minutes	2-3 days	No		No			My physical level allows me to be prepared for the game	During the initial warm-up
2021-10-29 13:14:43	Yes	25	Men	180	87	BADALONA (BARCELONA)	Regional	4 years	2019-2020	Senior category, Youth categories	7 or more games/week	In 2019-20 he arbitrated in the 3rd Catalan (4th category at the regional level of Catalonia)	Yes	No	To maintain or develop aerobic resistance (swimming, cycling, career, jumping, etc.), to maintain or develop muscle strength (different muscle strengthening techniques with machines, with free weight, with body weight itself, with elastic gums, etc.), to maintain or develop flexibility (either with the body, help from another person, or with elements such as towels, elastic rubber, foam roller, e…	More than 60 minutes	4-5 days	Yes	10 minutes	Yes	Stretches and joint mobility	To avoid discomfort in areas where I can feel seized or overloaded		During the initial warm-up, During the break between halves
2021-10-29 13:15:23	Yes	24	Men	181	89	Mataró, Barcelona	Local, Regional	Local (4 years), Regional (1 year).	2019-2020	Senior category, Youth categories	Between 6 and 7 games/week	Third Catalan and all lower than her. (Category B2)	Yes	No	To maintain or develop muscle strength (different muscle strengthening techniques with machines, with free weight, with body weight itself, with elastic rubber, etc.), to maintain or develop speed (ability to perform sprints in the shortest possible time possible and repeat them the greatest number of times)	More than 60 minutes	4-5 days	Yes	3-5 minutes	Yes	Stretches and joint mobility	Being 10 minutes, sometimes I feel that the joints of both knee and hip lose temperature and I feel more comfortable doing dynamic stretching and joint mobility for approximately one minute		During the initial warm-up, During the break between halves
2021-10-29 13:16:07	Yes	26	Men	181	70	Barcelona	Local	2 years	2020-2021	Youth categories	Between 3 and 4 games/week	2nd school	No	No		Less than 15 minutes	1 day	No		No			I do not need it	During the initial warm-up
2021-10-29 13:17:35	Yes	22	Men	191	76	Barcelona	Local	Local (4 years)	2020-2021	Youth categories	Between 4 and 5 games/week	Group 2	Yes	No	To maintain or develop aerobic resistance (swimming, cycling, career, jumping, etc.), to maintain or develop muscle strength (different muscle strengthening techniques with machines, with free weight, with body weight itself, with elastic gums, etc.), to maintain or develop speed (ability to perform sprints in the shortest possible time and repeat them the largest number of times)	More than 60 minutes	4-5 days	No		No			I always try to stay as less tired as possible to be able to officiate the following games with freshness. If I see that I am lacking a bit of activation, I do a few mobility exercises.	During the initial warm-up, During the break between halves	I do not consider them necessary, I am lazy
2021-10-29 13:17:36	Yes	21	Men	179	64	Barcelona	Local	Local (2 years)	2019-2020	Youth categories	Between 4 and 5 games/week	From pre-mini to cadet	No	No				No		No			I had never thought that it was necessary, I had not even thought about reactivation.	Never
2021-10-29 13:17:55	Yes	34	Men	180	115	Terrassa	Regional	1 year	2020-2021	Youth categories	Between 2 and 3 games/week	Mini and Premini	Yes	No	To maintain or develop aerobic resistance (swimming, cycling, career, jumping, etc.)	Between 30 and 45 minutes	1 day	No		No			In 3 minutes of rest it is not necessary to reactivate	During the initial warm-up
2021-10-29 13:18:53	Yes	26	Men	175	68	Girona	Regional	Regional (8 years)	2018-2019	Senior category	Between 4 and 5 games/week	Catalan	Yes	No	To maintain or develop aerobic resistance (swimming, cycling, career, jumping, etc.), to maintain or develop muscle strength (different muscle strengthening techniques with machines, with free weight, with body weight itself, with elastic rubber, etc.)	More than 60 minutes	6-7 days	Yes	5-10 minutes	No			There is a 10-minute break, where the match report is reviewed, and aspects to be improved in the second half are discussed with the partner.	During the initial warm-up
2021-10-29 13:19:25	Yes	37	Men	181	81	Barcelona, España	Regional	Regional(7 years)	2018-2019	Senior category, Youth categories	7 or more games/week	1st Catalan category, Catalunya Cup, Preferentos, School, Amateur	Yes	No	To maintain or develop muscle strength (different muscle strengthening techniques with machines, with free weight, with body weight itself, with elastic rubber, etc.), to maintain or develop flexibility (either with the body itself, help from Another person, or with elements such as towels, elastic gums, foam roller, etc.), to maintain or develop other capacities (coordination, balance, agility)	Between 45 and 60 minutes	4-5 days	Yes	5 minutes	No			I have no need. My body does not cool and the activation is almost immediate during the first plays of the game.	During the break between halves, At the end of the game
2021-10-29 13:22:08	Yes	29	Men	191	125	Barcelona, Barcelona	Regional	Regional (10 years)	2019-2020	Senior category	7 or more games/week	3rd Catalan (B2)	Yes	Yes	To maintain or develop aerobic resistance (swimming, cycling, career, jumping, etc.), to maintain or develop muscle strength (different muscle strengthening techniques with machines, with free weight, with body weight itself, with elastic gums, etc.), to maintain or develop speed (ability to perform sprints in the shortest possible time and repeat them the largest number of times), to maintain or…	Between 45 and 60 minutes	2-3 days	Yes	5-10 minutes	No			Rest is not enough to cool physically. then I don't need it	During the initial warm-up, At the end of the game	It is not a habit
2021-10-29 13:21:29	Yes	23	Men	173	69.7	Barcelona	Local	Local (4 years)	2018-2019	Youth categories	Between 4 and 5 games/week	Even childish	Yes	No	To maintain or develop muscle strength (different muscle strengthening techniques with machines, with free weight, with body weight itself, with elastic rubber, etc.)	More than 60 minutes	2-3 days	No		No			I don't have it as a habit	Never
2021-10-29 13:21:43	Yes	21	Men	189	88	L'Escala, Girona	Local, Regional	Local (2 years), regional (1 year)	2020-2021	Senior category, Youth categories	Between 4 and 5 games/week	FCBQ B2	Yes	No	To maintain or develop aerobic resistance (swimming, cycling, career, jumping, etc.)	Between 15 and 30 minutes	2-3 days	Yes	5-10 minutes	No			Lack of time.	During the initial warm-up, At the end of the game
2021-10-29 13:22:34	Yes	27	Men	170	63	Girona, Girona	Regional	Regional (5 years)	2019-2020	Senior category, Youth categories	Between 4 and 5 games/week	FCBQ B1	Yes	No	To maintain or develop aerobic resistance (swimming, cycling, career, jumping, etc.), to maintain or develop muscle strength (different muscle strengthening techniques with machines, with free weight, with body weight itself, with elastic rubber, etc.)	More than 60 minutes	4-5 days	No		No			I don't see it necessary enough	During the initial warm-up	-
2021-10-29 13:23:50	Yes	35	Women	174	ns	BARCELONA	Local, Regional	Local: 5 years / Regional 10 years	2019-2020	Senior category, Youth categories	Between 5 and 6 games/week	Catalan leagues	Yes	No	To maintain or develop aerobic resistance (swimming, cycling, career, jumping, etc.), to maintain or develop muscle strength (different muscle strengthening techniques with machines, with free weight, with body weight itself, with elastic gums, etc.), to maintain or develop flexibility (either with the body itself, help from another person, or with elements such as towels, elastic gums, foam roll…	Between 30 and 45 minutes	2-3 days	Yes	5 minutes	Yes	Stretches and joint mobility, Breath management techniques (activation/relaxation, awareness)	Physical recovery	-	During the initial warm-up, During the break between halves, At the end of the game	I do not do them frequently, but sometimes I do if I feel discomfort and I need to increase the temperature of the joint, of the muscle or the correspoding body part
2021-10-29 13:25:15	Yes	24	Men	183	96	Navàs, Barcelona	Local, Regional	Local (6 years) and Regional (4years)	2019-2020	Youth categories	Between 3 and 4 games/week	Premini, Mini, Pre -infant, Infant and Cadet	Yes	No	To maintain or develop aerobic resistance (swimming, cycling, career, jumping, etc.), to maintain or develop muscle strength (different muscle strengthening techniques with machines, with free weight, with body weight itself, with elastic gums, etc.), to maintain or develop speed (ability to perform sprints in the shortest possible time and repeat them the largest number of times)	More than 60 minutes	6-7 days	No		No			I take the time to relax the mind, disconnect from how the game goes, in order to return more concentrated.	Never
2021-10-29 13:25:32	Yes	23	Men	178	68	Parets del Vallès	Regional	regional (4 years )	2020-2021	Youth categories	Between 5 and 6 games/week	1st eabq	Yes	No	To maintain or develop aerobic resistance (swimming, cycling, career, jumping, etc.), to maintain or develop muscle strength (different muscle strengthening techniques with machines, with free weight, with body weight itself, with elastic gums, etc.), to maintain or develop flexibility (either with the body itself, help from another person, or with elements such as towels, elastic gums, foam roll…	More than 60 minutes	4-5 days	Yes	15 minutes	No			I have never considered doing reactivation exercises	During the initial warm-up, At the end of the game	Lack of time
2021-10-29 13:26:19	Yes	23	Men	184	68	Barcelona	Regional	3 years	2019-2020	Youth categories	7 or more games/week	EABQ 1A	Yes	No	To maintain or develop muscle strength (different muscle strengthening techniques with machines, with free weight, with body weight itself, with elastic rubber, etc.)	More than 60 minutes	4-5 days	No		No			Physical exhaustion and lack of time	Never
2021-10-29 13:26:33	Yes	38	Men	178	80	Malgrat de Mar, Barcelona	Local	Local 17 years	2018-2019	Senior category	Between 2 and 3 games/week	Women's Cat Cup, 1 male cat	Yes	No	To maintain or develop aerobic resistance (swimming, cycling, career, jumping, etc.), to maintain or develop muscle strength (different muscle strengthening techniques with machines, with free weight, with body weight itself, with elastic rubber, etc.)	More than 60 minutes	4-5 days	Yes	5-10 minutes	No	Jog or run		Rest, then mental activation since there are 3 minutes left to restart	During the initial warm-up
2021-10-29 13:26:36	Yes	54	Men	175	76	Barcelona	Regional	25 y	2018-2019	Senior category	Between 3 and 4 games/week	Catalunya Cup	Yes	No	To maintain or develop aerobic resistance (swimming, cycling, career, jumping, etc.), to maintain or develop muscle strength (different muscle strengthening techniques with machines, with free weight, with body weight itself, with elastic gums, etc.), to maintain or develop flexibility (either with the body, help from another person, or with elements such as towels, elastic rubber, foam roller, e…	Between 45 and 60 minutes	4-5 days	Yes	10 minutes	Yes	Stretches and joint mobility	Avoid injuries, keep physical tension		During the initial warm-up, During the break between halves	I had never considered it since I have never had any muscle problems. Maybe I should start doing it
2021-10-29 13:26:37	Yes	20	Men	185	75	Barcelona	Local	Local (2 years)	2020-2021	Youth categories	Between 2 and 3 games/week	Even cadet in Catalonia	Yes	No	To maintain or develop aerobic resistance (swimming, cycling, career, jumping, etc.), to maintain or develop muscle strength (different muscle strengthening techniques with machines, with free weight, with body weight itself, with elastic gums, etc.), to maintain or develop speed (ability to perform sprints in the shortest possible time and repeat them the largest number of times), to maintain or…	More than 60 minutes	4-5 days	No		No			I feel active from minute 1	Never
2021-10-29 13:27:10	Yes	29	Men	178	80	Mataro	Regional	8years	2020-2021	Senior category	Between 5 and 6 games/week	2b	Yes	No	To maintain or develop muscle strength (different muscle strengthening techniques with machines, with free weight, with body weight itself, with elastic rubber, etc.), to maintain or develop speed (ability to perform sprints in the shortest possible time possible and repeat them the greatest number of times)	More than 60 minutes	6-7 days	Yes	8 minutes	Yes	Stretches and joint mobility	So that the muscles are prepared to start the exercise again and do not lose temperature		During the break between halves
2021-10-29 13:27:39	Yes	27	Men	183	77	Barcelona	Regional	7 y	2021-2022	Senior category	Between 5 and 6 games/week	Catalan	Yes	No	To maintain or develop aerobic resistance (swimming, cycling, career, jumping, etc.), to maintain or develop muscle strength (different muscle strengthening techniques with machines, with free weight, with body weight itself, with elastic gums, etc.), to maintain or develop flexibility (either with the body itself, help from another person, or with elements such as towels, elastic gums, foam roll…	Between 45 and 60 minutes	2-3 days	Yes	6-8 minutes	No	Jog or run, Running at maximum speed (sprinting), Stretches and joint mobility			During the initial warm-up, At the end of the game
2021-10-29 13:33:16	Yes	34	Women	168	61	Borrassà, Girona	International	Local and Regional (17 years), National (7 years), International (2 years)	2018-2019	Senior category	Between 1 and 2 games/week	FEB Group 1	Yes	Yes	To maintain or develop aerobic resistance (swimming, cycling, career, jumping, etc.), to maintain or develop muscle strength (different muscle strengthening techniques with machines, with free weight, with body weight itself, with elastic gums, etc.), to maintain or develop speed (ability to perform sprints in the shortest possible time and repeat them the largest number of times), to maintain or…	More than 60 minutes	4-5 days	Yes	8-12 minutes	Yes	Jog or run, Running at maximum speed (sprinting), Breath management techniques (activation/relaxation, awareness), Other	To continue activated for the second half of the game both mentally and physically and thus avoid injuries or lack of concentration		During the initial warm-up, During the break between halves, At the end of the game	I do not require them in these categories
2021-10-29 13:33:54	Yes	19	Men	168	69	Barcelona	Local	Local 1 year	2020-2021	Youth categories	Between 2 and 3 games/week	3rd Escola d'Irbitres fcbq/2nd Escola d'S àrbitres fcbq	Yes	No	To maintain or develop aerobic resistance (swimming, cycling, career, jumping, etc.), to maintain or develop muscle strength (different muscle strengthening techniques with machines, with free weight, with body weight itself, with elastic rubber, etc.)	Between 30 and 45 minutes	2-3 days	No		No			The time interval between halves is very short	Never	I do not need it
2021-10-29 13:35:44	Yes	22	Men	181	75	Barcelona	Local	Local (3 years)	2018-2019	Youth categories	Between 2 and 3 games/week	Premini, Mini, Pre -infant, Infant, Cadet	No	No				No		No			I do not need it	Never
2021-10-29 13:38:35	Yes	22	Men	181	70	Viladrau, Girona	Local	Starting (march 2020) until now	2020-2021	Youth categories	Between 1 and 2 games/week	Escola 2 i Escola 3	Yes	No	To maintain or develop aerobic resistance (swimming, cycling, career, jumping, etc.)	Between 15 and 30 minutes	2-3 days	Yes	5 minutes	Yes	Jog or run	Not to get injured during the game		During the initial warm-up
2021-10-29 13:40:15	Yes	31	Men	189	86	Barcelona	Regional	10 years in Regional	2018-2019	Senior category	Between 4 and 5 games/week	Catalunya Cup	Yes	No	To maintain or develop aerobic resistance (swimming, cycling, career, jumping, etc.), to maintain or develop muscle strength (different muscle strengthening techniques with machines, with free weight, with body weight itself, with elastic gums, etc.), to maintain or develop flexibility (either with the body, help from another person, or with elements such as towels, elastic rubber, foam roller, e…	Between 45 and 60 minutes	2-3 days	Yes	5-7 minutes	No			10 minutes between quarters. Reviewing the record, commenting on relevant aspects of the game with the partner makes me not consider reactivating.	During the initial warm-up
2021-10-29 13:41:19	Yes	23	Men	165	64	Barcelona, Barcelona	Local, Regional	Local (3 years), Regional (2 years), National and International (without experience)	2019-2020	Youth categories	Between 3 and 4 games/week	Categories of the Catalan Basketball Federation: 1st school, cadet and lower categories	Yes	No	To maintain or develop aerobic resistance (swimming, cycling, career, jumping, etc.)	Between 45 and 60 minutes	2-3 days	No		No			I would say due to lack of time, but rather it would be due to the lack of habit	During the initial warm-up, At the end of the game
2021-10-29 13:42:29	Yes	32	Men	167	68	Barcelona	Regional	Regional (14 years)	2019-2020	Senior category	Between 5 and 6 games/week	Second Catalan	Yes	No	To maintain or develop aerobic resistance (swimming, cycling, career, jumping, etc.), to maintain or develop muscle strength (different muscle strengthening techniques with machines, with free weight, with body weight itself, with elastic gums, etc.), to maintain or develop flexibility (either with the body itself, help from another person, or with elements such as towels, elastic gums, foam roll…	Between 45 and 60 minutes	2-3 days	Yes	5-10 minutes	No	Jog or run, Running at maximum speed (sprinting), Stretches and joint mobility		I do some stretch	During the initial warm-up, During the break between halves
2021-10-29 13:43:40	Yes	42	Men	172	74	Canovelles (Barcelona)	Regional	6 y	2019-2020	Senior category, Youth categories	Between 1 and 2 games/week	3rd Catalan	Yes	No	To maintain or develop aerobic resistance (swimming, cycling, career, jumping, etc.)	Between 45 and 60 minutes	2-3 days	No		No				During the initial warm-up, During the break between halves
2021-10-29 13:44:59	Yes	49	Men	186	120	Gavá	Local	4 y	2019-2020	Youth categories	Between 4 and 5 games/week	School	Yes	No	To maintain or develop aerobic resistance (swimming, cycling, career, jumping, etc.)	Between 45 and 60 minutes	2-3 days	Yes	10 minutes	No			There is little time	During the initial warm-up
2021-10-29 13:46:16	Yes	26	Men	180	81	Canovelles/Barcelona	Local, Regional	Local (7 years), regional (7 years)	2019-2020	Senior category	Between 6 and 7 games/week	FCBQ B2	Yes	No	To maintain or develop muscle strength (different muscle strengthening techniques with machines, with free weight, with body weight itself, with elastic rubber, etc.), to maintain or develop flexibility (either with the body itself, help from Another person, or with elements such as towels, elastic tires, foam roller, etc.)	More than 60 minutes	4-5 days	Yes	5 minutes	No			Because I don't cool during the break	During the initial warm-up, During the break between halves
2021-10-29 13:47:09	Yes	36	Men	184	80	Banyoles (Gerona)	Regional	16 years Regional	2019-2020	Senior category	Between 3 and 4 games/week	A1 atonomics to children	Yes	No	To maintain or develop aerobic resistance (swimming, cycling, career, jumping, etc.)	More than 60 minutes	2-3 days	Yes	5-7 minutes	No	Jog or run, Running at maximum speed (sprinting), Stretches and joint mobility		There is no time (the game must be discussed and, in addition, I review the record)	During the initial warm-up
2021-10-29 13:47:30	Yes	26	Men	180	80	Barcelona	Regional	7 years	2020-2021	Senior category, Youth categories	Between 5 and 6 games/week	From Catalan down	Yes	No	To maintain or develop other capacities (coordination, balance, agility)	More than 60 minutes	2-3 days	Yes	5-8 minutes	No			There is little time in the break and we use it to talk about how the game is going and to prepare the second half	During the initial warm-up	After officiating, I only stretch in specific situations when I am overloaded by the quantity of games or by the weekly training volume
2021-10-29 13:47:46	Yes	23	Men	170	63	Barcelona	Local	2 years and a half	2020-2021	Senior category, Youth categories	Between 6 and 7 games/week	3rd Catalan	Yes	Yes	To maintain or develop aerobic resistance (swimming, cycling, career, jumped to the commons, etc.), to maintain or develop speed (ability to perform sprints in the shortest possible time and repeat them the greatest number of times), for maintain or develop flexibility (either with the body itself, help from another person, or with elements such as towels, elastic rubber, foam roller, etc.)	More than 60 minutes	6-7 days	No		No			I have never needed, in fact, I haven't think about it	Never
2021-10-29 13:51:56	Yes	19	Men	185	72	Sabadell, Barcelona.	Local	Local (1 month)	2021-2022	Youth categories	Between 1 and 2 games/week	Premini i Minis.	Yes	No	To maintain or develop aerobic resistance (swimming, cycling, career, jumping, etc.), to maintain or develop muscle strength (different muscle strengthening techniques with machines, with free weight, with body weight itself, with elastic gums, etc.), to maintain or develop flexibility (either with the body itself, help from another person, or with elements such as towels, elastic gums, foam roll…	More than 60 minutes	4-5 days	Yes	In a normal training it can last takes 20 minutes, during a competition about 45 minutes and in a match where I referee about 15 minutes.	Yes	Stretches and joint mobility	To be prepared for the restart of the competition		During the initial warm-up, During the break between halves, At the end of the game
2021-10-29 13:51:58	Yes	25	Men	191	80	Barcelona	Regional	Regional (3years),	2020-2021	Youth categories	Between 1 and 2 games/week	FCBQ	Yes	No	To maintain or develop aerobic resistance (swimming, cycling, career, jumping, etc.), to maintain or develop muscle strength (different muscle strengthening techniques with machines, with free weight, with body weight itself, with elastic gums, etc.), to maintain or develop speed (ability to perform sprints in the shortest possible time and repeat them the largest number of times), to maintain or…	More than 60 minutes	6-7 days	No		No			Laziness, it does not imply an activity that requires more than a minute of trot and mobility	During the initial warm-up
2021-10-29 13:54:54	Yes	24	Women	166	59	Barcelona	Local	Local (4 years)	2018-2019	Youth categories	Between 1 and 2 games/week	1st school	Yes	No	To maintain or develop aerobic resistance (swimming, cycling, career, jumping, etc.)	Between 45 and 60 minutes	2-3 days	No		No				Never
2021-10-29 13:55:58	Yes	28	Men	180	70	Barcelona	Local, Regional	5 Local 6 regional	2019-2020	Senior category, Youth categories	Between 6 and 7 games/week	Catalan	Yes	No	To maintain or develop aerobic resistance (swimming, cycling, career, jumping, etc.), to maintain or develop muscle strength (different muscle strengthening techniques with machines, with free weight, with body weight itself, with elastic gums, etc.), to maintain or develop flexibility (either with the body, help from another person, or with elements such as towels, elastic rubber, foam roller, e…	More than 60 minutes	4-5 days	Yes	5-8 minutes	No			The lack of time	During the initial warm-up, At the end of the game
2021-10-29 13:55:59	Yes	34	Women	175	68	Barcelona	Local, Regional	15, 15	2017-2018	Senior category, Youth categories	Between 4 and 5 games/week	National: 2017 - News; FEB - Group 3: 2021-22	Yes	No	To maintain or develop aerobic resistance (swimming, cycling, career, jumping, etc.), to maintain or develop muscle strength (different muscle strengthening techniques with machines, with free weight, with body weight itself, with elastic gums, etc.), to maintain or develop speed (ability to perform sprints in the shortest possible time and repeat them the largest number of times)	Between 45 and 60 minutes	4-5 days	Yes	10 minutes	No			Lack of habit	During the initial warm-up, During the break between halves, At the end of the game
2021-10-29 13:59:36	Yes	38	Men	188	100	Barcelona	Regional	Regional ( 10 )	2019-2020	Senior category, Youth categories	Between 4 and 5 games/week	A1, A2, B1, B2 (Catalunya)	Yes	No	To maintain or develop aerobic resistance (swimming, cycling, career, jumping, etc.), to maintain or develop muscle strength (different muscle strengthening techniques with machines, with free weight, with body weight itself, with elastic gums, etc.), to maintain or develop other capacities (coordination, balance, agility)	More than 60 minutes	4-5 days	No		No			I sincerely think I don't need it	At the end of the game
2021-10-29 14:00:11	Yes	33	Men	189	94	Barcelona	Regional	Regional 4	2018-2019	Senior category, Youth categories	Between 6 and 7 games/week	Basquet Català B1	Yes	Yes	To maintain or develop aerobic resistance (swimming, cycling, career, jumping, etc.), to maintain or develop muscle strength (different muscle strengthening techniques with machines, with free weight, with body weight itself, with elastic gums, etc.), to maintain or develop flexibility (either with the body itself, help from another person, or with elements such as towels, elastic gums, foam roll…	Between 45 and 60 minutes	4-5 days	Yes	13 minutes	Yes	Stretches and joint mobility	Refrain from cooling down to avoid injuries		During the initial warm-up, During the break between halves, At the end of the game	There is no time. Sometimes I do a little bit if the game was intense
2021-10-29 14:07:46	Yes	33	Men	190	90	Prat llobregat, Barcelona	Local	(13 years)	2020-2021	Youth categories	Between 4 and 5 games/week	School	Yes	No	To maintain or develop aerobic resistance (swimming, cycling, career, jumped to the Comba, etc.), to maintain or develop other capacities (coordination, balance, agility)	More than 60 minutes	4-5 days	No		No			There is no time. We dedicate it to the match talk.	Never, During the initial warm-up
2021-10-29 14:07:53	Yes	2	Men	174	72	Barcelina	Regional	6 years	2018-2019	Senior category, Youth categories	Between 3 and 4 games/week	3rd Catalan	No	No	To maintain or develop aerobic resistance (swimming, cycling, career, jumping, etc.)	Between 30 and 45 minutes	2-3 days	Yes	10 minutes	No			I prefer to rest mentally	During the initial warm-up
2021-10-29 14:15:18	Yes	24	Men	180	98	Esparreguera, Barcelona	Local	Local (3 years)	2020-2021	Youth categories	Between 6 and 7 games/week	1st Escola	Yes	No	To maintain or develop aerobic resistance (swimming, cycling, career, jumping, etc.)	Between 45 and 60 minutes	2-3 days	Yes	5-10 minutes	No			It depends on the category and demand of each game, on the physical load that you accumulated during the weekend ... In 10 minutes I usually prefer to take a break, to endorse the game situation and think about how to act in the second half. If I see myself with some physical discomfort, then I try to stretch and warm-up a little	During the initial warm-up	There is a lack of training or information about what it is necessary to do
2021-10-29 14:17:06	Yes	23	Men	180	73	Barcelona	Local	Local (3 years)	2018-2019	Youth categories	Between 1 and 2 games/week	Mini category and FCBQ catwalk	Yes	No	To maintain or develop aerobic resistance (swimming, cycling, career, jumping, etc.)	More than 60 minutes	4-5 days	No		No			At the moment, in the categories where I officiate, there are only 3 minutes between halves	Never
2021-10-29 14:21:27	Yes	31	Men	190	85	Granollers, Barcelona	Regional	Regional 10 years	2021-2022	Senior category	Between 3 and 4 games/week	Catalunya Cup	Yes	No	To maintain or develop aerobic resistance (swimming, cycling, career, jumping, etc.)	Between 30 and 45 minutes	4-5 days	Yes	Low intensity run during 5 minutes and stretching	Yes	Stretches and joint mobility	To prepare the body again for physical exercise		During the initial warm-up, During the break between halves, At the end of the game
2021-10-29 14:23:06	Yes	20	Men	191	87	Barcelona	Local	1 month	2021-2022	Youth categories	Between 1 and 2 games/week	Pre-mini and mini	Yes	Yes	To maintain or develop muscle strength (different muscle strengthening techniques with machines, with free weight, with body weight itself, with elastic rubber, etc.)	More than 60 minutes	2-3 days	No		No			I don't know what to do	Never
2021-10-29 14:23:12	Yes	23	Men	191	85	Cerdanyola del Vallès	Regional	Regional (2 years)	2020-2021	Youth categories	Between 6 and 7 games/week	Interterritorial cadet, first year and lower cadet	No					Yes	Stretching and continuous running	Yes	Stretches and joint mobility	Due to muscle cooling		During the initial warm-up, During the break between halves
2021-10-29 14:28:01	Yes	20	Men	185	69	Barcelona	Local, Regional	Local (1 year), Regional (2 years), National (without experience), International (without experience)	2019-2020	Youth categories	Between 2 and 3 games/week	2EABQ (FCBQ Referees School)	Yes	No	To maintain or develop aerobic resistance (swimming, cycling, career, jumping, etc.), to maintain or develop muscle strength (different muscle strengthening techniques with machines, with free weight, with body weight itself, with elastic rubber, etc.)	Between 45 and 60 minutes	2-3 days	No		No			I do not see it necessary for the level of individual refereeing. However, I am aware that running a little (10 minutes) before the game is recommended.	At the end of the game
2021-10-29 14:30:48	Yes	22	Men	177	57	Barcelona	Local, Regional	Local (2 years) Regional (2 years)	2020-2021	Senior category	7 or more games/week	B2 Catalunya	Yes	No	To maintain or develop muscle strength (different muscle strengthening techniques with machines, with free weight, with body weight itself, with elastic rubber, etc.)	More than 60 minutes	1 day	No		No				During the initial warm-up
2021-10-29 14:31:50	Yes	25	Women	165	56	Barcelona	Local, Regional	4 years total	2020-2021	Senior category	Between 4 and 5 games/week	Committee B2	Yes	Yes	To maintain or develop aerobic resistance (swimming, cycling, career, jumping, etc.), to maintain or develop muscle strength (different muscle strengthening techniques with machines, with free weight, with body weight itself, with elastic rubber, etc.)	More than 60 minutes	4-5 days	Yes	5-10 minutes	Yes	Stretches and joint mobility, Breath management techniques (activation/relaxation, awareness)	Get more concentrated and with muscle activation		At the break between the first and second quarters, During the break between halves, At the break between the third and last quarter
2021-10-29 14:32:45	Yes	28	Men	190	85	Anglès, Girona	Local	2 years	2020-2021	Youth categories	Between 1 and 2 games/week	Eabq	Yes	No	To maintain or develop aerobic resistance (swimming, cycling, career, jumping, etc.), to maintain or develop muscle strength (different muscle strengthening techniques with machines, with free weight, with body weight itself, with elastic gums, etc.), to maintain or develop flexibility (either with the body itself, help from another person, or with elements such as towels, elastic gums, foam roll…	More than 60 minutes	4-5 days	No		Yes	Stretches and joint mobility	To be able to give 100% just after the break and not get injured		During the break between halves, At the end of the game
2021-10-29 14:39:54	Yes	43	Men	180	96.25	Barcelona	Local, Regional	Local (21 years), regional (21years)	2020-2021	Senior category, Youth categories	Between 2 and 3 games/week	Catalan territorial	Yes	No	To maintain or develop aerobic resistance (swimming, cycling, career, jumping, etc.), to maintain or develop muscle strength (different muscle strengthening techniques with machines, with free weight, with body weight itself, with elastic gums, etc.), to maintain or develop speed (ability to perform sprints in the shortest possible time and repeat them the largest number of times), to maintain or…	More than 60 minutes	4-5 days	Yes	About 20 minutes	Yes	Jog or run, Stretches and joint mobility, Breath management techniques (activation/relaxation, awareness)	To be in the same muscle tone in the second half		During the initial warm-up, At the break between the first and second quarters, At the end of the game
2021-10-29 14:41:06	Yes	22	Men	178	73	Sant Julia de Vilatorta, Barcelona	Regional	Regional - 2 years (including COVID pandemic)	2020-2021	Youth categories	Between 2 and 3 games/week	Interterritorial cadet, children, pre-infantiles and minis	Yes					Yes	5 minutes	Yes	Stretches and joint mobility	To avoid running after losing temperature		During the initial warm-up, During the break between halves
2021-10-29 14:41:12	Yes	24	Men	194	105	Tarragona	Local, Regional	Local (3), Regional (1)	2019-2020	Youth categories	Between 4 and 5 games/week	Cadet, Infant and Minis	Yes	No	To maintain or develop aerobic resistance (swimming, cycling, career, jumping, etc.), to maintain or develop muscle strength (different muscle strengthening techniques with machines, with free weight, with body weight itself, with elastic rubber, etc.)	More than 60 minutes	2-3 days	Yes	5 minutes	Yes	Stretches and joint mobility	To avoid losing muscle temperature and have them tense and active		During the initial warm-up, During the break between halves, At the end of the game
2021-10-29 14:44:45	Yes	2	Men	178	74	Barcelona	Regional	17 y	2019-2020	Senior category	Between 5 and 6 games/week	First male Catalan	Yes	No	To maintain or develop aerobic resistance (swimming, cycling, career, jumping, etc.), to maintain or develop muscle strength (different muscle strengthening techniques with machines, with free weight, with body weight itself, with elastic rubber, etc.)	More than 60 minutes	2-3 days	Yes	8 minutes run and 4 minutes joint mobility	Yes	Jog or run, Stretches and joint mobility, Breath management techniques (activation/relaxation, awareness)	Emotional download habit. Physical activity. Restart concentration		During the initial warm-up, During the break between halves
2021-10-29 14:47:30	Yes	33	Men	180	74	Barcelona	Regional	3 y	2018-2019	Senior category	Between 5 and 6 games/week	B2 Catalan Federation	No					Yes	5 minutes	No			I replenish energy consuming a banana	During the initial warm-up
2021-10-29 14:51:04	Yes	27	Women	169	65	Mataró (barcelona)	Regional	2 years in Local and Regional	2019-2020	Youth categories	Between 6 and 7 games/week	Catalan Basketball Federation. 1st school	Yes	No	To maintain or develop muscle strength (different muscle strengthening techniques with machines, with free weight, with body weight itself, with elastic rubber, etc.), to maintain or develop speed (ability to perform sprints in the shortest possible time possible and to repeat them the greatest number of times), to maintain or develop flexibility (either with the body itself, help from another pe…	Less than 15 minutes	2-3 days	Yes	Depending on the game. If it is two-referees system, I try to perform a routine; 2 or 3 sprints, some ballistic series and leg stretching. Always dynamic.	No			I think I don't need a reactivation.	During the initial warm-up
2021-10-29 14:53:58	Yes	24	Women	161	62	Girona	Local	Local 1 year	2020-2021	Youth categories	Between 1 and 2 games/week	Mini, Infant	No					No		No			I feel good and I think I don't need it	At the end of the game
2021-10-29 15:12:03	Yes	33	Men	192	87	Barcelona, Barcelona	Local, Regional	Local (10), regional (5)	2020-2021	Senior category, Youth categories	Between 5 and 6 games/week	B1	Yes	No	To maintain or develop muscle strength (different muscle strengthening techniques with machines, with free weight, with body weight itself, with elastic rubber, etc.)	Between 45 and 60 minutes	2-3 days	Yes	3 minutes	No			I usually devote it to commenting on aspects about the game with fellow referees	During the initial warm-up
2021-10-29 15:12:46	Yes	23	Women	180	65	Cunit, Tarragona	Regional	Regional (3 years)	2018-2019	Youth categories	Between 5 and 6 games/week	2nd school, 1st school	Yes	No	To maintain or develop aerobic resistance (swimming, cycling, career, jumping, etc.), to maintain or develop muscle strength (different muscle strengthening techniques with machines, with free weight, with body weight itself, with elastic gums, etc.), to maintain or develop speed (ability to perform sprints in the shortest possible time and repeat them the largest number of times), to maintain or…	More than 60 minutes	2-3 days	No		No			The rhythm of the matches in the category did not demand so much	At the end of the game
2021-10-29 15:18:02	Yes	30	Men	171	69	Viladecans	Local, Regional	Local 2 years Regional 2 years	2020-2021	Senior category, Youth categories	Between 5 and 6 games/week	1st category eabq	Yes	No	To maintain or develop aerobic resistance (swimming, cycling, career, jumping, etc.), to maintain or develop muscle strength (different muscle strengthening techniques with machines, with free weight, with body weight itself, with elastic gums, etc.), to maintain or develop speed (ability to perform sprints in the shortest possible time and repeat them the largest number of times), to maintain or…	More than 60 minutes	2-3 days	Yes	2 minutes	Yes	Stretches and joint mobility	Physically activate to be with the right concentration for the second half		During the initial warm-up, During the break between halves
2021-10-29 15:20:53	Yes	21	Women	168	65	Castellar del Vallès, Barcelona	Local	Local (1mes) regional, National and International (without experience)	2020-2021	Youth categories	1 game/week	Mini and Premini Categories D and C	No	No				No		No			There are only 3 minutes of rest	At the end of the game
2021-10-29 15:24:31	Yes	50	Men	167	75	Badalona, Barcelona	Regional	Local(4), regional(4) National(without experience), International(without experience)	2018-2019	Senior category, Youth categories	7 or more games/week	Category B2	Yes	No	To maintain or develop aerobic resistance (swimming, cycling, career, jumping, etc.), to maintain or develop muscle strength (different muscle strengthening techniques with machines, with free weight, with body weight itself, with elastic gums, etc.), to maintain or develop speed (ability to perform sprints in the shortest possible time and repeat them the largest number of times), to maintain or…	Between 45 and 60 minutes	2-3 days	Yes	10 minutes	Yes	Stretches and joint mobility	Not to cool		During the initial warm-up, During the break between halves, At the end of the game	I have not seen them necessary to perform my work
2021-10-29 15:24:41	Yes	20	Men	171	63	Ripollet, Barcelona	Local, Regional	Local (3 years), Regional (2 years)	2020-2021	Youth categories	Between 2 and 3 games/week	Pre-mini and mini promotion d, c, b and a	Yes	No	To maintain or develop other capacities (coordination, balance, agility)	More than 60 minutes	2-3 days	No		No			Lack of time between halves, rest and drink water before starting the next half.	Never
2021-10-29 15:34:42	Yes	35	Men	167	65	Badalona	Regional	6 y	2020-2021	Senior category, Youth categories	Between 3 and 4 games/week	2nd Catalan	Yes	No	To maintain or develop aerobic resistance (swimming, cycling, career, jumping, etc.), to maintain or develop muscle strength (different muscle strengthening techniques with machines, with free weight, with body weight itself, with elastic rubber, etc.)	Between 45 and 60 minutes	2-3 days	Yes	15 minutes	No			No reason	At the end of the game
2021-10-29 15:38:38	Yes	29	Women	167	58	Pallejà, Barcelona	Local, Regional	Local (3 years) Regional (3 years)	2020-2021	Senior category, Youth categories	Between 6 and 7 games/week	Group B2	Yes	No	To maintain or develop aerobic resistance (swimming, cycling, career, jumping, etc.), to maintain or develop muscle strength (different muscle strengthening techniques with machines, with free weight, with body weight itself, with elastic gums, etc.), to maintain or develop speed (ability to perform sprints in the shortest possible time and repeat them the largest number of times)	Between 45 and 60 minutes	2-3 days	Yes	15 minutes	No			I take the opportunity to talk to the partner of the game to improve	During the initial warm-up	There are no reasons
2021-10-29 15:40:37	Yes	33	Men	168	90	Santa Coloma de Gramenet, Barcelona	Local	6 years	2018-2019	Senior category, Youth categories	Between 4 and 5 games/week	Third Catalan	No	No	To maintain or develop other capacities (coordination, balance, agility)	Less than 15 minutes	1 day	No	1 minute	No	Other		Lack of time	Never
2021-10-29 15:40:47	Yes	57	Men	175	75	Cerdanyola del Vallès, Barcelona	Regional, National	20 Regional, 9 National	2020-2021	Senior category, Youth categories	Between 3 and 4 games/week	Autonomous	Yes	No	To maintain or develop aerobic resistance (swimming, cycling, career, jumping, etc.), to maintain or develop muscle strength (different muscle strengthening techniques with machines, with free weight, with body weight itself, with elastic rubber, etc.)	Between 30 and 45 minutes	2-3 days	Yes	7 minutes	No				During the initial warm-up, At the end of the game
2021-10-29 15:45:24	Yes	23	Women	160	60	Barcelona	Local	3 years	2020-2021	Youth categories	Between 4 and 5 games/week	3rd school, 2nd school	Yes	No	To maintain or develop aerobic resistance (swimming, cycling, career, jumping, etc.), to maintain or develop muscle strength (different muscle strengthening techniques with machines, with free weight, with body weight itself, with elastic gums, etc.), to maintain or develop speed (ability to perform sprints in the shortest possible time and repeat them the largest number of times), to maintain or…	More than 60 minutes	4-5 days	No		No			I did not consider it	During the initial warm-up, At the end of the game
2021-10-29 16:08:26	Yes	50	Men	172	67	Gavà, Barcelona	Regional	24 years	2020-2021	Senior category, Youth categories	Between 1 and 2 games/week	B1	Yes	No	To maintain or develop aerobic resistance (swimming, cycling, career, jumped to the Comba, etc.), to maintain or develop other capacities (coordination, balance, agility)	More than 60 minutes	4-5 days	No		No			I review the scoresheet and talk about the game with the partner	During the initial warm-up
2021-10-29 16:27:53	Yes	45	Men	180	78	Barcelona	Regional	Regional (26 years)	2019-2020	Senior category, Youth categories	Between 3 and 4 games/week	1st National Division (Catalonia Cup)	No	No	To maintain or develop aerobic resistance (swimming, cycling, career, jumping, etc.)	Less than 15 minutes	2-3 days	Yes	5-10 minutes	No			Hydrate and comment on the game	During the initial warm-up		In the sex section it would be necessary to incorporate others (not only man or woman)
2021-10-29 16:43:52	Yes	26	Men	186	103	Begur, Girona	Local, Regional	Local (8 years), Regional (8 years), National (without experience), International (without experience)	2020-2021	Senior category, Youth categories	Between 4 and 5 games/week	Copa Cataluña, First Catalan, Second Catalan, Third Catalan	Yes	No	To maintain or develop aerobic resistance (swimming, cycling, career, jumping, etc.)	Between 30 and 45 minutes	1 day	Yes	5 minutes	No			I hadn't thought about this	During the initial warm-up
2021-10-29 16:45:18	Yes	24	Men	186	67	Olot, Girona	Local, Regional	4 years	2019-2020	Senior category, Youth categories	Between 4 and 5 games/week	B2 COPQ	Yes	No	To maintain or develop aerobic resistance (swimming, cycling, career, jumping, etc.)	Between 15 and 30 minutes	4-5 days	Yes	5 minutes	No	Jog or run, Running at maximum speed (sprinting), Stretches and joint mobility		Ignorance	During the initial warm-up, At the end of the game	I don't feel the need to do it (even if it's wrong)
2021-10-29 17:02:22	Yes	27	Women	163	58	Barcelona	Local	4 years (Local, in Barcelona)	2018-2019	Senior category	7 or more games/week	Third Catalan Category + Basquet School	Yes	No	To maintain or develop muscle strength (different muscle strengthening techniques with machines, with free weight, with body weight itself, with elastic rubber, etc.)	Between 30 and 45 minutes	2-3 days	No		No			Probably (and although it sounds bad) for laziness. With 25 years I don't feel that need to warm-up before running again ...	Never	Low evidence of stretching helping in injury prevention	All the best with the study!
2021-10-29 17:06:09	Yes	27	Men	170	62	Reus	Regional	Local (2 years) Regional (4 years)	2019-2020	Senior category	Between 5 and 6 games/week	2nd Catalan category	Yes	No	To maintain or develop aerobic resistance (swimming, cycling, career, jumping, etc.), to maintain or develop muscle strength (different muscle strengthening techniques with machines, with free weight, with body weight itself, with elastic gums, etc.), to maintain or develop speed (ability to perform sprints in the shortest possible time and repeat them the largest number of times)	Between 45 and 60 minutes	4-5 days	No		No			Review the scoresheet and chat with partner	Never
2021-10-29 17:46:35	Yes	20	Men	180	100	Badaloma	Local	Local(1year)	2020-2021	Youth categories	Between 1 and 2 games/week	Pre-mini and mini basketball	Yes	No	To maintain or develop aerobic resistance (swimming, cycling, career, jumped to the commits, etc.), to maintain or develop speed (ability to perform sprints in the shortest possible time and repeat them the largest number of times)	More than 60 minutes	4-5 days	No		Yes	Breath management techniques (activation/relaxation, awareness)			During the initial warm-up, At the end of the game
2021-10-29 18:28:54	Yes	23	Women	167	62	Begur	Local	Local (2 years)	2020-2021	Youth categories	Between 1 and 2 games/week	3rd Territorial Escola	Yes	No	To maintain or develop other capacities (coordination, balance, agility)	Less than 15 minutes	2-3 days	Yes	5-10 minutes	No			The breaks are at most 3 minutes so I don't cool much during this time interval.	During the initial warm-up
2021-10-29 18:42:18	Yes	21	Women	163	65	Barcelona	Local, Regional	Local (1 year and a half) Regional (lees than one month) National (0 years) International (0 years)	2018-2019	Youth categories	Between 4 and 5 games/week	Pre-benjamí/benjamí/pre-eleví/fry	Yes	No	To maintain or develop speed (ability to perform sprints in the shortest possible time and repeat them the largest number of times)	Between 30 and 45 minutes	1 day	No		No			Sometimes the teams themselves do not prefer the complete rest, and I do not feel entirely physically exhausted to stretch. I do it at the end.	At the end of the game
2021-10-29 21:05:23	Yes	48	Men	182	78	Terrassa, Barcelona	Regional, National	National 7, Regional 31	2018-2019	Senior category, Youth categories	Between 3 and 4 games/week	Catalunya Cup,	Yes	No	To maintain or develop aerobic resistance (swimming, cycling, career, jumping, etc.)	Between 30 and 45 minutes	2-3 days	Yes	10-15 minutes	No			The need to disconnect both physically and mentally from the game.	During the initial warm-up, At the end of the game
2021-10-29 21:10:59	Yes	23	Women	164	53	Badalona, Barcelona	Local	4 years Local	2018-2019	Youth categories	Between 5 and 6 games/week	Pre-mini, mini, pre-infant, childish, cadet	Yes	No	To maintain or develop aerobic resistance (swimming, cycling, career, jumping, etc.), to maintain or develop muscle strength (different muscle strengthening techniques with machines, with free weight, with body weight itself, with elastic gums, etc.), to maintain or develop speed (ability to perform sprints in the shortest possible time and repeat them the largest number of times), to maintain or…	More than 60 minutes	6-7 days	Yes	5 minutes	No			Chat among the referees	During the initial warm-up, At the end of the game		I think that being a student of physical activity and sports sciences makes me more aware of the import of mobility before the game, stretching later and doing sports during the week.
2021-10-29 23:01:56	Yes	55	Men	194	102	Barcelona	Local, Regional	Local (16), regional (12)	2018-2019	Senior category, Youth categories	Between 3 and 4 games/week	Third Catalan and lower	Yes	No	To maintain or develop aerobic resistance (swimming, cycling, career, jumping, etc.), to maintain or develop muscle strength (different muscle strengthening techniques with machines, with free weight, with body weight itself, with elastic gums, etc.), to maintain or develop flexibility (either with the body, help from another person, or with elements such as towels, elastic rubber, foam roller, e…	Between 15 and 30 minutes	2-3 days	Yes	5-10 minutes	No			Lack of time	During the initial warm-up
2021-10-30 00:43:07	Yes	24	Women	166	60	Viladecans, Barcelon	Local	3 years	2018-2019	Youth categories	Between 4 and 5 games/week	Preferred Infant	Yes	No	To maintain or develop aerobic resistance (swimming, cycling, career, jumping, etc.), to maintain or develop muscle strength (different muscle strengthening techniques with machines, with free weight, with body weight itself, with elastic gums, etc.), to maintain or develop other capacities (coordination, balance, agility)	Between 45 and 60 minutes	4-5 days	No		No			I usually go to the locker room between games to go to the toilet or drink water.	During the initial warm-up	I can't find the importance
2021-10-30 06:33:55	Yes	18	Men	183	76	Barcelona	Local	Local (2 meses), Regional (without experience), National (without experience), International (without experience) *	2020-2021	Youth categories	1 game/week	Mini i Premini	Yes	No	To maintain or develop muscle strength (different muscle strengthening techniques with machines, with free weight, with body weight itself, with elastic rubber, etc.)	More than 60 minutes	2-3 days	No		No			I can't find importance	Never
2021-10-30 10:33:45	Yes	31	Men	184	78	Barcelona	Regional	13 years	2020-2021	Senior category, Youth categories	Between 3 and 4 games/week	Do not arbitrate last season	Yes	Yes	To maintain or develop muscle strength (different muscle strengthening techniques with machines, with free weight, with body weight itself, with elastic rubber, etc.)	More than 60 minutes	4-5 days	Yes	Approximately 5 minutes	Yes	Stretches and joint mobility, Breath management techniques (activation/relaxation, awareness)			During the initial warm-up, During the break between halves
2021-10-30 13:03:01	Yes	25	Women	168	59	Girona	Regional	Regional (6 years)	2019-2020	Youth categories	Between 1 and 2 games/week	Category 1st School Referee	Yes	No	To maintain or develop aerobic resistance (swimming, cycling, career, jumping, etc.), to maintain or develop muscle strength (different muscle strengthening techniques with machines, with free weight, with body weight itself, with elastic gums, etc.), to maintain or develop speed (ability to perform sprints in the shortest possible time and repeat them the largest number of times)	More than 60 minutes	4-5 days	No		No				During the initial warm-up
2021-10-30 13:17:55	Yes	24	Men	195	125	Hospitalet de Llobregat	Local	2 years (Local)	2020-2021	Youth categories	Between 3 and 4 games/week	2020-21 3A Category Referees School (FCBQ) 2021-22 2A Referees School Category (FCBQ)	Yes	No	To maintain or develop aerobic resistance (swimming, cycling, career, jumped to the commons, etc.), to maintain or develop speed (ability to perform sprints in the shortest possible time and repeat them the greatest number of times), for maintain or develop other capacities (coordination, balance, agility)	Between 45 and 60 minutes	2-3 days	Yes	10-15 minutes	Yes	Stretches and joint mobility, Breath management techniques (activation/relaxation, awareness)	Do not lose freshness and prevent the body from losing activation		During the break between halves, At the end of the game
2021-10-30 18:24:11	Yes	23	Men	173	65	Lleida	Local	Local in Menorca "Islas Baleares" (3 years). Local in Lleida "Cataluña" 1 year.	2018-2019	Senior category, Youth categories	Between 6 and 7 games/week	From child to senior interislas (maximum regional category within the FBIB)	Yes	No	To maintain or develop aerobic resistance (swimming, cycling, career, jumping, etc.), to maintain or develop muscle strength (different muscle strengthening techniques with machines, with free weight, with body weight itself, with elastic gums, etc.), to maintain or develop flexibility (either with the body itself, help from another person, or with elements such as towels, elastic gums, foam roll…	More than 60 minutes	6-7 days	Yes	Between 3 and 5 minutes of joint mobility and dynamic stretching	No			In competitions where children are playing, breaks last 3 minutes, so there is no significant interruption. And in the upper categories whenever we are 2 referees we use the break to review the scoresheet and comment on the aspects to take into account for the second half, so there is not usually much time to make a great activation. Even so, if there is time for this, I try to actively stretch t…	During the initial warm-up
2021-10-30 22:20:02	Yes	23	Men	180	70	Barcelona	Local	3 years	2020-2021	Youth categories	Between 5 and 6 games/week	Promotion categories	Yes	No	To maintain or develop muscle strength (different muscle strengthening techniques with machines, with free weight, with body weight itself, with elastic rubber, etc.)	Between 45 and 60 minutes	2-3 days	No		No				Never
2021-10-31 01:04:10	Yes	48	Men	176	79	Lleida	Local	19 years	2020-2021	Senior category, Youth categories	Between 4 and 5 games/week	3rd Catalan	Yes	No	To maintain or develop muscle strength (different muscle strengthening techniques with machines, with free weight, with body weight itself, with elastic rubber, etc.), to maintain or develop speed (ability to perform sprints in the shortest possible time possible and repeat them the greatest number of times)	More than 60 minutes	4-5 days	No		No			Because I don't consider it.	During the initial warm-up
2021-10-31 17:27:44	Yes	23	Women	161	60	Tiana, Barcelona	Local	Local (2 years)	2018-2019	Youth categories	Between 2 and 3 games/week	2nd school and 3rd school	Yes	No	To maintain or develop aerobic resistance (swimming, cycling, career, jumping, etc.)	Between 30 and 45 minutes	4-5 days	Yes	5-7 minutes	Yes	Jog or run, Stretches and joint mobility	Keep the body warm and avoid injuries		During the initial warm-up, During the break between halves, At the end of the game
2021-10-31 19:11:42	Yes	27	Men	174	73	Tarragona	Local, Regional	Local 9 years, Regional 7 years	2018-2019	Senior category, Youth categories	Between 3 and 4 games/week	From territorial cadets to the Catalan category (autonomic 2nd)	Yes	No	To maintain or develop aerobic resistance (swimming, cycling, career, jumping, etc.), to maintain or develop muscle strength (different muscle strengthening techniques with machines, with free weight, with body weight itself, with elastic gums, etc.), to maintain or develop flexibility (either with the body itself, help from another person, or with elements such as towels, elastic gums, foam roll…	More than 60 minutes	4-5 days	Yes	5 minutes of warm-up followed by stretching	Yes	Breath management techniques (activation/relaxation, awareness)	Regulate stress and pressure		During the initial warm-up
2021-11-01 11:03:21	Yes	50	Men	183	90	Barcelona	Local	Local(13)	2018-2019	Senior category, Youth categories	7 or more games/week	FCQB (Group B2)	Yes	No	To maintain or develop aerobic resistance (swimming, cycling, career, jumping, etc.), to maintain or develop muscle strength (different muscle strengthening techniques with machines, with free weight, with body weight itself, with elastic gums, etc.), to maintain or develop speed (ability to perform sprints in the shortest possible time and repeat them the largest number of times), to maintain or…	Between 45 and 60 minutes	2-3 days	No		No			At the moment and based on my sensations, I have not needed	During the initial warm-up
2021-11-01 12:21:35	Yes	19	Men	180	60	Figueres, Girona	Local	Local (1 year), Regional (without experience), National (without experience), International (without experience)	2020-2021	Youth categories	Between 1 and 2 games/week	Pre-mini, Mini	Yes	No	To maintain or develop muscle strength (different muscle strengthening techniques with machines, with free weight, with body weight itself, with elastic rubber, etc.)	More than 60 minutes	4-5 days	No		No			I do not consider necessary in my case to physically reactivate before resuming the game.	Never
2021-11-01 13:48:26	Yes	24	Men	176	63	Badalona, Barcelona	Regional	Regional (6 years)	2019-2020	Senior category	Between 6 and 7 games/week	Senior 1a Catalan, Junior, Cadets, etc.	Yes	No	To maintain or develop aerobic resistance (swimming, cycling, career, jumping, etc.)	Between 15 and 30 minutes	2-3 days	Yes	5-10 minutes	No			I prefer to comment with the partner the first half, take the opportunity to eat some fruit or bars, rest for a few minutes and continue with the concentration of the game.	During the initial warm-up
2021-11-01 17:17:13	Yes	45	Men	182	86	Girona	Local, Regional	20 years	2019-2020	Senior category, Youth categories	Between 1 and 2 games/week	3rd	Yes	No	To maintain or develop muscle strength (different muscle strengthening techniques with machines, with free weight, with body weight itself, with elastic rubber, etc.)	Between 45 and 60 minutes	2-3 days	Yes	10 minutes	No	Jog or run, Running at maximum speed (sprinting), Stretches and joint mobility	Important to stretch and warm-up to avoid injuries	I do not need it	During the initial warm-up, At the end of the game
2021-11-01 23:03:41	Yes	23	Women	175	67	Barcelona	Local, Regional	3 years	2018-2019	Youth categories	Between 5 and 6 games/week	FCBQ School	Yes	No	To maintain or develop aerobic resistance (swimming, cycling, career, jumping, etc.), to maintain or develop muscle strength (different muscle strengthening techniques with machines, with free weight, with body weight itself, with elastic gums, etc.), to maintain or develop other capacities (coordination, balance, agility)	Between 45 and 60 minutes	2-3 days	No		No				Never	Because I don't give them any importance and due to laziness and lack of time
2021-11-02 01:59:20	Yes	21	Men	180	78	Barcelona	Local, Regional	Local (3 years) regional (1 year)	2019-2020	Youth categories	Between 5 and 6 games/week	EABQ 3A I 2A	Yes	No	To maintain or develop aerobic resistance (swimming, cycling, career, jumping, etc.), to maintain or develop muscle strength (different muscle strengthening techniques with machines, with free weight, with body weight itself, with elastic gums, etc.), to maintain or develop speed (ability to perform sprints in the shortest possible time and repeat them the largest number of times), to maintain or…	More than 60 minutes	6-7 days	No		No				Never
2021-11-02 10:02:53	Yes	25	Men	170	64	Castellar del Vallès, Barcelona	Local	Local (3 years)	2020-2021	Youth categories	Between 5 and 6 games/week	FCBQ Referees School	Yes	No	To maintain or develop aerobic resistance (swimming, cycling, career, jumping, etc.), to maintain or develop muscle strength (different muscle strengthening techniques with machines, with free weight, with body weight itself, with elastic rubber, etc.)	More than 60 minutes	2-3 days	Yes	5 minutes	No	Stretches and joint mobility		I do not usually consider it necessary, since most matches have short breaks (3 minutes).	During the initial warm-up
2021-11-02 11:05:55	Yes	48	Men	171	66	bcn	Regional, International	31 total, International 15 days	2020-2021	Senior category, Youth categories	Between 3 and 4 games/week	Catalunya 1 National Divison	Yes	Yes	To maintain or develop aerobic resistance (swimming, cycling, career, jumping, etc.), to maintain or develop muscle strength (different muscle strengthening techniques with machines, with free weight, with body weight itself, with elastic gums, etc.), to maintain or develop speed (ability to perform sprints in the shortest possible time and repeat them the largest number of times), to maintain or…	Between 45 and 60 minutes	6-7 days	Yes	5 minutes	No			I don't need it, I do it mentally	During the initial warm-up, At the end of the game
[truncated: 8 more rows]
