# Supplementary material for: Do you even exercise, ref? Exploring habits of Spanish basketball referees during practice and matches
Source: PeerJ. 2024 Jan 29;12:e16742. doi: 10.7717/peerj.16742 (PMC10832620; doi:10.7717/peerj.16742)
Supplement: Supplemental Information 2 [file peerj-12-16742-s002.xlsx]

## Sheet: Respuestas de formulario 1
Marca temporal	Declaración de consentimiento informado. Habiendo sido informado/a del objetivo y finalidad de la investigación, y de las condiciones de su participación, ¿deseas participar?	Edad (años)	Sexo	Altura (cm)	Peso (Kg)	Lugar de residencia habitual (localidad, provincia)	Experiencia de arbitraje. Puede indicar varias opciones	Por favor, precise cuántos años de experiencia para cada una de las opciones anteriormente elegidas. Por ejemplo: local (20 años), regional/autonómica (19 años), nacional (10 años), internacional (sin experiencia)	¿En base a que temporada va a responder las siguientes preguntas? (siempre que sea posible, conteste basándose es una temporada pre-pandemia)	Tipo de competiciones arbitradas	Frecuencia semanal de partidos arbitrados	¿En que categoría ha arbitrado? (FEB, grupo 1, grupo 2, etc.). Indique todas las categorías donde ha arbitrado durante la temporada que ha elegido previamente (por ejemplo, 2019-2020)	¿Realiza usted ejercicio físico (actividad física planificada, estructurada, repetitiva y que favorece el mantenimiento o el desarrollo de la aptitud física) habitualmente? Por ejemplo, salir a correr o en bicicleta, entrenar en el gimnasio, nadar en la piscina, etc.?	¿Tiene usted preparador físico personal?	¿Qué tipo de ejercicio físico realiza habitualmente? Puede seleccionar más de un tipo	En un día típico, ¿podría indicar cuánto tiempo dedica a este ejercicio físico?	En una semana típica, ¿podría indicar cuántos días a la semana realiza este ejercicio físico?	¿Tiene usted alguna rutina física de calentamiento antes de comenzar a arbitrar un partido?	¿En caso afirmativo, cuánto tiempo dedica a esta rutina física? Por favor, indique una cantidad de minutos concreta (por ejemplo, 3 minutos, o 20 minutos), o un rango de minutos (por ejemplo, 5-10 minutos, o más de 15 minutos, etc)	¿Durante el descanso de los partidos (entre mitades), tiene usted una rutina de ejercicio para reactivarse físicamente?	En caso afirmativo, indique por favor qué tipo de actividades realiza (puede marcar varias opciones)	En caso positivo, ¿podría indicar el motivo o los motivos para reactivarse físicamente durante el descanso entre mitades?	En caso negativo, ¿podría indicar el motivo o los motivos para no reactivarse físicamente durante el descanso entre mitades?	En relación a los ejercicios de estiramiento y/o movilidad articular, ¿cuándo los realiza? (puede señalar varias opciones)	Finalmente, si ha contestado que nunca realiza ejercicios de estiramiento y/o movilidad articular, ¿podría indicar el motivo/s de esto?	COMENTARIOS
2021-08-26 19:25:35	Sí	1968-08-25	Hombre	188	98	A Coruña	Nacional, Internacional	Nacional (28 años) internacional (18 años)	2020-2021	Categoría senior	Entre 2 y 3 partidos/semana	ACB Euroleague Eurocup	Sí	No	Para mantener o desarrollar la resistencia aeróbica (natación, ciclismo, carrera, saltar a la comba, etc.), Para mantener o desarrollar la fuerza muscular (diferentes técnicas de fortalecimiento muscular con máquinas, con peso libre, con el propio peso corporal, con gomas elásticas, etc.), Para mantener o desarrollar la velocidad (capacidad de realizar sprints en el menor tiempo posible y de repe…	Entre 45 y 60 minutos	4-5 días	Sí	15	No			Falta de costumbre	Durante el calentamiento inicial, Durante el descanso entre mitades, Al finalizar el partido
2021-08-26 19:32:01	Sí	1999-02-26	Hombre	185	73	Vilagarcía de Arousa, Pontevedra	Regional/Autonómica	Local (1 año), Autonómica (2 años)	2018-2019	Categoría senior, Categorías inferiores	Entre 5 y 6 partidos semana	Categoría sub 23 Galicia	Sí	Sí	Para mantener o desarrollar la resistencia aeróbica (natación, ciclismo, carrera, saltar a la comba, etc.), Para mantener o desarrollar la fuerza muscular (diferentes técnicas de fortalecimiento muscular con máquinas, con peso libre, con el propio peso corporal, con gomas elásticas, etc.), Para mantener o desarrollar la velocidad (capacidad de realizar sprints en el menor tiempo posible y de repe…	Más de 60 minutos	6-7 días	Sí	15 minutos	No			Revisión de acta, charla del partido etc	Durante el calentamiento inicial
2021-08-26 19:33:11	Sí	1992-08-18	Hombre	1.81	77	Lugo	Regional/Autonómica	8	2020-2021	Categoría senior, Categorías inferiores	Entre 5 y 6 partidos semana	Grupo 1 FGB	Sí	Sí	Para mantener o desarrollar la fuerza muscular (diferentes técnicas de fortalecimiento muscular con máquinas, con peso libre, con el propio peso corporal, con gomas elásticas, etc.), Para mantener o desarrollar la velocidad (capacidad de realizar sprints en el menor tiempo posible y de repetirlos el mayor número de veces)	Entre 45 y 60 minutos	4-5 días	Sí	15 min	No			Concentración	Al finalizar el partido
2021-08-26 19:33:16	Sí	2001-12-27	Hombre	1.73	69	Ourense Ourense	Local, Regional/Autonómica	Local (4) autonómica (1)	2020-2021	Categoría senior, Categorías inferiores	Entre 4 y 5 partidos/semana	Grupo 2	Sí	No	Para mantener o desarrollar la resistencia aeróbica (natación, ciclismo, carrera, saltar a la comba, etc.), Para mantener o desarrollar la fuerza muscular (diferentes técnicas de fortalecimiento muscular con máquinas, con peso libre, con el propio peso corporal, con gomas elásticas, etc.), Para mantener o desarrollar otras capacidades (coordinación, equilibrio, agilidad)	Más de 60 minutos	6-7 días	Sí	10 minutos	No			Normalmente vamos al vestuario a discutir cuestiones técnicas y en 10 minutos no suelo necesitar reactivarme	Durante el calentamiento inicial
2021-08-26 19:34:03	Sí	2001-03-24	Hombre	1.7	65	Ourense	Local, Regional/Autonómica	Local( 2 años) autonómica ( 5 años)	2020-2021	Categoría senior, Categorías inferiores	Entre 5 y 6 partidos semana	Grupo 1	Sí	No	Para mantener o desarrollar la resistencia aeróbica (natación, ciclismo, carrera, saltar a la comba, etc.)	Entre 45 y 60 minutos	2-3 días	Sí	5 minutos calentamiento	No			Es algo que se tiene que corregir ya que lo más probable es no entrar bien de nuevo en el partido y provocar lesiones en algunos casos	Durante el calentamiento inicial, Al finalizar el partido
2021-08-26 19:34:14	Sí	1983-12-20	Mujer	169	62	Outeiro de Rei, Lugo	Local, Regional/Autonómica	Local 6 años, autonómica 3 años	2018-2019	Categoría senior, Categorías inferiores	Entre 6 y 7 partidos semana	FGB grupo 1	Sí	No	Para mantener o desarrollar la resistencia aeróbica (natación, ciclismo, carrera, saltar a la comba, etc.), Para mantener o desarrollar la fuerza muscular (diferentes técnicas de fortalecimiento muscular con máquinas, con peso libre, con el propio peso corporal, con gomas elásticas, etc.), Para mantener o desarrollar la flexibilidad (ya sea con el propio cuerpo, ayuda de otra persona, o con eleme…	Entre 30 y 45 minutos	4-5 días	Sí	5-10 minutos	No			No lo considero necesario o no me lo había planteado	Durante el calentamiento inicial, En el descanso entre primer y segundo cuarto, Durante el descanso entre mitades, En el descanso entre tercer y último cuarto, Al finalizar el partido
2021-08-26 19:34:26	Sí	1990-09-15	Hombre	174	70	Pontevedra	Regional/Autonómica	14	2020-2021	Categoría senior, Categorías inferiores	Entre 4 y 5 partidos/semana	Grupo 1	Sí	No	Para mantener o desarrollar la resistencia aeróbica (natación, ciclismo, carrera, saltar a la comba, etc.), Para mantener o desarrollar la fuerza muscular (diferentes técnicas de fortalecimiento muscular con máquinas, con peso libre, con el propio peso corporal, con gomas elásticas, etc.)	Entre 45 y 60 minutos	6-7 días	Sí	10 minutos	No			Considero que no llego a desactivarme fisicamente durante esos 10 minutos.	Durante el calentamiento inicial, Al finalizar el partido
2021-08-26 19:35:31	Sí	1996-11-17	Hombre	172	72	Noia (A Coruña)	Local, Regional/Autonómica, Nacional	Local (4 años); Autonómica (3 años); Nacional (1 año)	2019-2020	Categoría senior, Categorías inferiores	Entre 6 y 7 partidos semana	Todas a nivel autonómico y local, tanto senior como categorías inferiores	Sí	No	Para mantener o desarrollar la resistencia aeróbica (natación, ciclismo, carrera, saltar a la comba, etc.), Para mantener o desarrollar la fuerza muscular (diferentes técnicas de fortalecimiento muscular con máquinas, con peso libre, con el propio peso corporal, con gomas elásticas, etc.)	Más de 60 minutos	4-5 días	No		No			Tiempo insuficiente	Durante el calentamiento inicial
2021-08-26 19:38:31	Sí	1976-08-13	Hombre	187	93	Vigo, Pontevedra	Local, Regional/Autonómica	Local (4 años) autonómico (21 años)	2018-2019	Categoría senior, Categorías inferiores	Entre 4 y 5 partidos/semana	Grupo 1 (Comité Gallego)	No	No				Sí	5 mimutos	No			Son 10 minutos de descanso. Charla con compañero + charla oficiales ya no da tiempo. Priorizo control de partido	Durante el calentamiento inicial, Al finalizar el partido		The pre -season physical routine is different from that reflected here. In the months of July December and January I do routine physical work to maintain or recover the form. With 4-4 games on weekends during the week I dedicate myself to walk and follow a balanced diet.
2021-08-26 19:38:45	Sí	1999-08-25	Mujer	1.77	68	Ferrol	Local	Local (3años)	2019-2020	Categorías inferiores	Entre 6 y 7 partidos semana	Sub23	Sí	No	Para mantener o desarrollar la resistencia aeróbica (natación, ciclismo, carrera, saltar a la comba, etc.), Para mantener o desarrollar la fuerza muscular (diferentes técnicas de fortalecimiento muscular con máquinas, con peso libre, con el propio peso corporal, con gomas elásticas, etc.)	Entre 30 y 45 minutos	2-3 días	No		Sí	Ejercicio de fuerza (saltos, flexiones, etc.), Estiramientos y movilidad articular	Para no enfriarme, intento seguir activa para la segunda mitad		Al finalizar el partido
2021-08-26 19:39:47	Sí	1999-02-26	Mujer	159	51	A Coruña	Local, Regional/Autonómica	Local (5 años) Autonómica (2)	2018-2019	Categoría senior	Entre 6 y 7 partidos semana	Zonal	Sí	No	Para mantener o desarrollar la resistencia aeróbica (natación, ciclismo, carrera, saltar a la comba, etc.), Para mantener o desarrollar la fuerza muscular (diferentes técnicas de fortalecimiento muscular con máquinas, con peso libre, con el propio peso corporal, con gomas elásticas, etc.)	Entre 45 y 60 minutos	2-3 días	Sí	3 minutos	No			Prefiero hablar con mis compañeros aspectos del partido	Al finalizar el partido
2021-08-26 19:42:33	Sí	1996-05-11	Hombre	181	75	Ferrol	Regional/Autonómica	5 años	2019-2020	Categoría senior, Categorías inferiores	7 o más partidos/semana	Grupo 1	Sí	No	Para mantener o desarrollar la resistencia aeróbica (natación, ciclismo, carrera, saltar a la comba, etc.)	Entre 30 y 45 minutos	2-3 días	No		No			Pereza	Durante el calentamiento inicial
2021-08-26 19:46:04	Sí	1993-12-25	Hombre	188	85	Ferrol	Local, Regional/Autonómica	Local (5 años), regional/autonomico (2 años)	2020-2021	Categoría senior, Categorías inferiores	Entre 6 y 7 partidos semana	Categorías inferiores, disponible grupo 1 FEGABA	Sí	No	Para mantener o desarrollar la resistencia aeróbica (natación, ciclismo, carrera, saltar a la comba, etc.), Para mantener o desarrollar la fuerza muscular (diferentes técnicas de fortalecimiento muscular con máquinas, con peso libre, con el propio peso corporal, con gomas elásticas, etc.)	Entre 45 y 60 minutos	2-3 días	No		No			Me veo siempre activo, no suelo apagarme durante el descanso	Nunca	No me veo necesitado
2021-08-26 19:46:47	Sí	2002-05-26	Hombre	172	55	Lugo	Local, Regional/Autonómica	3 años local y 3 años autonómica	2020-2021	Categoría senior, Categorías inferiores	Entre 3 y 4 partidos/semana	Categoría sub23 FGB	No					Sí	5 minutos	Sí	Estiramientos y movilidad articular	Dos razones: entrar concentrado y activado físicamente		Durante el calentamiento inicial, Durante el descanso entre mitades, Al finalizar el partido
2021-08-26 19:50:49	Sí	1995-03-28	Hombre	182	92	Baiona	Local, Regional/Autonómica, Nacional	Local ( 8 años), regional (6 años), nacional (1 año)	2018-2019	Categoría senior, Categorías inferiores	7 o más partidos/semana	Grupo 1 gallego	Sí	No	Para mantener o desarrollar la resistencia aeróbica (natación, ciclismo, carrera, saltar a la comba, etc.), Para mantener o desarrollar la fuerza muscular (diferentes técnicas de fortalecimiento muscular con máquinas, con peso libre, con el propio peso corporal, con gomas elásticas, etc.), Para mantener o desarrollar la velocidad (capacidad de realizar sprints en el menor tiempo posible y de repe…	Entre 45 y 60 minutos	2-3 días	Sí	5-10	No			He respondido NO porque no tengo una rutina, unos estiramientos y algo breve de activación se suele hacer, sobre todo con descansos largos. Normalmente no suelo enfriar.	Durante el calentamiento inicial, Durante el descanso entre mitades, Al finalizar el partido
2021-08-26 20:00:50	Sí	1992-04-11	Hombre	180	87	Oleiros, A Coruña	Local, Regional/Autonómica	Local (7años), Autonómica (3 años), Nacional (sin experiencia), internacional (sin experiencia)	2020-2021	Categoría senior, Categorías inferiores	Entre 6 y 7 partidos semana	Grupo 1 federacion gallega de baloncesto	Sí	No	Para mantener o desarrollar la resistencia aeróbica (natación, ciclismo, carrera, saltar a la comba, etc.), Para mantener o desarrollar la fuerza muscular (diferentes técnicas de fortalecimiento muscular con máquinas, con peso libre, con el propio peso corporal, con gomas elásticas, etc.)	Entre 45 y 60 minutos	2-3 días	Sí	5 minutos	No			El tiempo de descanso se me hace insuficiente para realizar estos ejercicios tras comentar los aspectos técnicos con el resto del equipo arbitral.	Durante el calentamiento inicial
2021-08-26 20:03:43	Sí	2002-01-04	Hombre	175	80	Burela	Local, Regional/Autonómica	local (1 año) autonomico (1año)	2020-2021	Categorías inferiores	Entre 2 y 3 partidos/semana	iniciación	Sí	No	Para mantener o desarrollar la resistencia aeróbica (natación, ciclismo, carrera, saltar a la comba, etc.)	Entre 45 y 60 minutos	2-3 días	No		No	Estiramientos y movilidad articular, Técnicas de manejo de la respiración (activación/relajación, conciencia)	si tengo que viajar llego cansado y necesito calentar	aunque descanse mi fisico suele seguir activo	Nunca	estirar las piernas sobre todo si tengo q viajar en coche
2021-08-26 20:10:11	Sí	1999-03-16	Hombre	184	69	Sarria, Lugo	Local, Regional/Autonómica	Local (3 años), regional/autonomica (3 años)	2018-2019	Categoría senior, Categorías inferiores	Entre 6 y 7 partidos semana	Zonal e infantil/cadete/junior autonómica	Sí	No	Para mantener o desarrollar la fuerza muscular (diferentes técnicas de fortalecimiento muscular con máquinas, con peso libre, con el propio peso corporal, con gomas elásticas, etc.)	Más de 60 minutos	4-5 días	Sí	10-15 min	Sí	Estiramientos y movilidad articular	Tratar de activar de nuevo tobillos, espalda, piernas...		Durante el calentamiento inicial, Durante el descanso entre mitades, Al finalizar el partido
2021-08-26 20:29:59	Sí	1995-02-04	Hombre	185	77	A Coruña, A Coruña	Local, Regional/Autonómica	local (5 años), regional/autonomica (1 año)	2018-2019	Categoría senior, Categorías inferiores	7 o más partidos/semana	Sub 23 hasta esta temporada, esta temporada Vinculado a Grupo 1 autonomico	Sí	No	Para mantener o desarrollar la fuerza muscular (diferentes técnicas de fortalecimiento muscular con máquinas, con peso libre, con el propio peso corporal, con gomas elásticas, etc.)	Menos de 15 minutos	4-5 días	No		No			No me es necesario, debido al gran numero de partidos que hago prefiero descansar	Al finalizar el partido
2021-08-26 20:32:06	Sí	1984-03-07	Mujer	157	54	Baiona	Regional/Autonómica	Local/autonómico 16	2020-2021	Categoría senior	Entre 3 y 4 partidos/semana	Autonómica Galicia	Sí	Sí	Para mantener o desarrollar la fuerza muscular (diferentes técnicas de fortalecimiento muscular con máquinas, con peso libre, con el propio peso corporal, con gomas elásticas, etc.), Para mantener o desarrollar la velocidad (capacidad de realizar sprints en el menor tiempo posible y de repetirlos el mayor número de veces), Para mantener o desarrollar la flexibilidad (ya sea con el propio cuerpo, …	Más de 60 minutos	4-5 días	Sí	6-9 minutos	Sí	Estiramientos y movilidad articular	Para manteneme activa		En el descanso entre tercer y último cuarto, Al finalizar el partido	Para mantene el músculo caliente
2021-08-26 20:36:58	Sí	2001-05-22	Hombre	185	75	Vigo, Pontevedra	Regional/Autonómica	Local (2 años), Regional/Autonómica (2 años), Nacional/Internacional (sin experiencia)	2020-2021	Categoría senior, Categorías inferiores	Entre 4 y 5 partidos/semana	Zonal	Sí	No	Para mantener o desarrollar la resistencia aeróbica (natación, ciclismo, carrera, saltar a la comba, etc.), Para mantener o desarrollar la fuerza muscular (diferentes técnicas de fortalecimiento muscular con máquinas, con peso libre, con el propio peso corporal, con gomas elásticas, etc.)	Más de 60 minutos	6-7 días	No		No				Durante el calentamiento inicial, Durante el descanso entre mitades
2021-08-26 21:00:13	Sí	1992-04-15	Hombre	180	72	Vigo	Local, Regional/Autonómica	Local (3 años), autonómica (2 años)	2018-2019	Categoría senior, Categorías inferiores	Entre 6 y 7 partidos semana	Grupo 1	Sí	Sí	Para mantener o desarrollar la resistencia aeróbica (natación, ciclismo, carrera, saltar a la comba, etc.), Para mantener o desarrollar la fuerza muscular (diferentes técnicas de fortalecimiento muscular con máquinas, con peso libre, con el propio peso corporal, con gomas elásticas, etc.), Para mantener o desarrollar la velocidad (capacidad de realizar sprints en el menor tiempo posible y de repe…	Más de 60 minutos	4-5 días	Sí	3 minutos	No				Durante el calentamiento inicial, Durante el descanso entre mitades
2021-08-26 21:25:37	Sí	1971-07-07	Hombre	180	86	Lugo	Regional/Autonómica, Nacional	Autonómico 27, Nacional 2	2019-2020	Categoría senior, Categorías inferiores	Entre 5 y 6 partidos semana	Autonómica	Sí	No	Para mantener o desarrollar la resistencia aeróbica (natación, ciclismo, carrera, saltar a la comba, etc.), Para mantener o desarrollar la fuerza muscular (diferentes técnicas de fortalecimiento muscular con máquinas, con peso libre, con el propio peso corporal, con gomas elásticas, etc.), Para mantener o desarrollar la flexibilidad (ya sea con el propio cuerpo, ayuda de otra persona, o con eleme…	Entre 45 y 60 minutos	4-5 días	Sí	5-10 minutos	No			Poco tiempo, tener que revisar acta y comentar con compañero	Al finalizar el partido
2021-08-26 21:38:49	Sí	1975-09-10	Hombre	1.76	85	Lugo	Regional/Autonómica	Local 18 años, autonómica 10 años	2018-2019	Categoría senior	Entre 4 y 5 partidos/semana	Grupo 1	No	No	Para mantener o desarrollar la resistencia aeróbica (natación, ciclismo, carrera, saltar a la comba, etc.)	Menos de 15 minutos	1 día	Sí	5 minutos	No			No lo necesito	Durante el calentamiento inicial
2021-08-26 22:31:06	Sí	1976-06-14	Hombre	169	62	Santiago de Compostela ( A Coruña)	Regional/Autonómica	Local(3 años), autonómico(21),nacional(6años)	2018-2019	Categoría senior	Entre 2 y 3 partidos/semana	Autonómico	Sí	No	Para mantener o desarrollar la resistencia aeróbica (natación, ciclismo, carrera, saltar a la comba, etc.), Para mantener o desarrollar la velocidad (capacidad de realizar sprints en el menor tiempo posible y de repetirlos el mayor número de veces)	Entre 30 y 45 minutos	2-3 días	Sí	(5-10 minutos)	Sí	Estiramientos y movilidad articular	Concentración		Durante el calentamiento inicial, Durante el descanso entre mitades, Al finalizar el partido
2021-08-26 22:46:33	Sí	1996-03-25	Mujer	164	64	Pontevedra	Local, Regional/Autonómica	Local y autonomica (2 años)	2019-2020	Categoría senior, Categorías inferiores	7 o más partidos/semana	Grupo 2 gallego	Sí	No	Para mantener o desarrollar la resistencia aeróbica (natación, ciclismo, carrera, saltar a la comba, etc.), Para mantener o desarrollar la fuerza muscular (diferentes técnicas de fortalecimiento muscular con máquinas, con peso libre, con el propio peso corporal, con gomas elásticas, etc.), Para mantener o desarrollar otras capacidades (coordinación, equilibrio, agilidad)	Entre 45 y 60 minutos	4-5 días	Sí	5-10 min	No			No siento necesidad de hacerlo, normalmente sigo estando activa en el descanso.	Al finalizar el partido
2021-08-26 22:54:02	Sí	2006-09-01	Hombre	170	55	A Coruña	Local	4 años	2019-2020	Categorías inferiores	Entre 5 y 6 partidos semana	Grupo 2	Sí	No	Para mantener o desarrollar la resistencia aeróbica (natación, ciclismo, carrera, saltar a la comba, etc.)	Más de 60 minutos	4-5 días	No		No				Durante el calentamiento inicial
2021-08-26 23:39:57	Sí	2004-12-28	Hombre	1'75	60	O Grove, Pontevedra	Local	5 años	2018-2019	Categoría senior, Categorías inferiores	Entre 3 y 4 partidos/semana	Grupo 2 FGB	Sí	No	Para mantener o desarrollar la resistencia aeróbica (natación, ciclismo, carrera, saltar a la comba, etc.), Para mantener o desarrollar la fuerza muscular (diferentes técnicas de fortalecimiento muscular con máquinas, con peso libre, con el propio peso corporal, con gomas elásticas, etc.), Para mantener o desarrollar la velocidad (capacidad de realizar sprints en el menor tiempo posible y de repe…	Entre 30 y 45 minutos	2-3 días	No		No			Debido a mi condición física correcta	Al finalizar el partido
2021-08-26 23:46:09	Sí	1973-08-14	Hombre	190	90	Vigo	Local, Regional/Autonómica	10 años Local 5 años autónomica	2019-2020	Categoría senior, Categorías inferiores	Entre 6 y 7 partidos semana	Grupo 2	Sí	No	Para mantener o desarrollar la resistencia aeróbica (natación, ciclismo, carrera, saltar a la comba, etc.), Para mantener o desarrollar la fuerza muscular (diferentes técnicas de fortalecimiento muscular con máquinas, con peso libre, con el propio peso corporal, con gomas elásticas, etc.)	Entre 30 y 45 minutos	2-3 días	Sí	3-5 minutos	No			Me dedico a revisar el acta del partido hasta ese momento y comentar con los compañeros las incidencias de la primera mitad	Durante el calentamiento inicial, Al finalizar el partido
2021-08-27 00:11:51	Sí	1989-07-31	Hombre	178	82	A Coruña	Regional/Autonómica	Local (11 años), regional (5 años), nacional (sin exp), internacional (sin experiencia)	2017-2018	Categoría senior, Categorías inferiores	7 o más partidos/semana	Hasta Autonómica	Sí	No	Para mantener o desarrollar la resistencia aeróbica (natación, ciclismo, carrera, saltar a la comba, etc.), Para mantener o desarrollar la fuerza muscular (diferentes técnicas de fortalecimiento muscular con máquinas, con peso libre, con el propio peso corporal, con gomas elásticas, etc.), Para mantener o desarrollar la velocidad (capacidad de realizar sprints en el menor tiempo posible y de repe…	Más de 60 minutos	4-5 días	Sí	5-15 minutos	No			Concentración, y descanso mental	Durante el calentamiento inicial, Al finalizar el partido
2021-08-27 08:26:05	Sí	1997-04-02	Hombre	172	83	Vigo, Pontevedra	Local, Regional/Autonómica	local (9 años), regional/autonómica (8 años)	2020-2021	Categoría senior, Categorías inferiores	7 o más partidos/semana	Grupo 1 FGB	Sí	No	Para mantener o desarrollar la resistencia aeróbica (natación, ciclismo, carrera, saltar a la comba, etc.), Para mantener o desarrollar la velocidad (capacidad de realizar sprints en el menor tiempo posible y de repetirlos el mayor número de veces)	Entre 45 y 60 minutos	2-3 días	Sí	3 minutos	No	Trotar o correr, Correr a máxima velocidad (esprintar), Estiramientos y movilidad articular		Falta de tiempo entre mitades y porque no considero necesario reactivarme, ya que sigo activo	Durante el calentamiento inicial, Durante el descanso entre mitades
2021-08-27 08:27:22	Sí	2003-08-06	Hombre	175	60	Vigo, Pontevedra	Regional/Autonómica	Local(sin experiencia), regional/autonomica(4 años), nacional(sin experiencia), internacional (sin experiencia)	2018-2019	Categoría senior, Categorías inferiores	Entre 3 y 4 partidos/semana	Fegaba grupo 2	Sí	No	Para mantener o desarrollar la resistencia aeróbica (natación, ciclismo, carrera, saltar a la comba, etc.)	Entre 30 y 45 minutos	4-5 días	Sí	5-10 minutos	No			En principio no lo suelo necesitar	Durante el calentamiento inicial
2021-08-27 09:32:37	Sí	1991-10-16	Hombre	191	80	Vilagarcía, Pontevedra	Local, Regional/Autonómica	Local (7 años), autonómica (3 años)	2020-2021	Categoría senior, Categorías inferiores	Entre 5 y 6 partidos semana	Grupo 1	Sí	No	Para mantener o desarrollar la resistencia aeróbica (natación, ciclismo, carrera, saltar a la comba, etc.), Para mantener o desarrollar la fuerza muscular (diferentes técnicas de fortalecimiento muscular con máquinas, con peso libre, con el propio peso corporal, con gomas elásticas, etc.)	Más de 60 minutos	4-5 días	Sí	10-15 minutos	No			Prioridad en utilizar ese tiempo en tratar temas técnicos del arbitraje	Durante el calentamiento inicial, Durante el descanso entre mitades, Al finalizar el partido
2021-08-27 11:12:51	Sí	1992-12-31	Mujer	169	54	A Coruña	Regional/Autonómica	3 años	2020-2021	Categoría senior, Categorías inferiores	Entre 5 y 6 partidos semana	Disponible grupo 1 FGB	Sí	No	Para mantener o desarrollar la resistencia aeróbica (natación, ciclismo, carrera, saltar a la comba, etc.), Para mantener o desarrollar la fuerza muscular (diferentes técnicas de fortalecimiento muscular con máquinas, con peso libre, con el propio peso corporal, con gomas elásticas, etc.), Para mantener o desarrollar la flexibilidad (ya sea con el propio cuerpo, ayuda de otra persona, o con eleme…	Entre 45 y 60 minutos	2-3 días	Sí	4’	No			Priorizar otras cosas del partido	Al finalizar el partido
2021-08-27 13:54:14	Sí	1997-05-24	Hombre	174	73	Vigo	Local, Regional/Autonómica	Local(3 años), regional(1 año)	2019-2020	Categoría senior, Categorías inferiores	Entre 4 y 5 partidos/semana	Fegaba grupo 2	Sí	No	Para mantener o desarrollar la resistencia aeróbica (natación, ciclismo, carrera, saltar a la comba, etc.), Para mantener o desarrollar la velocidad (capacidad de realizar sprints en el menor tiempo posible y de repetirlos el mayor número de veces), Para mantener o desarrollar otras capacidades (coordinación, equilibrio, agilidad)	Entre 30 y 45 minutos	4-5 días	No		No			Comodidad y necesidad de hablar aspectos del partido	Al finalizar el partido
2021-08-27 23:30:23	Sí	1982-03-16	Hombre	177	83	Santiago de Compostela, A Coruña	Regional/Autonómica	Local (4años) y regional/autonómica (21 años)	2019-2020	Categoría senior	Entre 2 y 3 partidos/semana	Grupo 1 de la federación gallega de baloncesto	Sí	No	Para mantener o desarrollar la resistencia aeróbica (natación, ciclismo, carrera, saltar a la comba, etc.)	Entre 30 y 45 minutos	1 día	Sí	5 minutos	No	Trotar o correr		En diez minutos no tenemos tiempo	Durante el calentamiento inicial
2021-08-28 13:20:04	Sí	1999-12-10	Hombre	176	70	A Coruña	Regional/Autonómica	Local (5 años) Regional/Autonómica (2 años) Nacional (sin experiencia) Internacional (sin experiencia)	2018-2019	Categorías inferiores	Entre 4 y 5 partidos/semana	2018-2019: Iniciación	Sí	No	Para mantener o desarrollar la resistencia aeróbica (natación, ciclismo, carrera, saltar a la comba, etc.), Para mantener o desarrollar la velocidad (capacidad de realizar sprints en el menor tiempo posible y de repetirlos el mayor número de veces)	Entre 15 y 30 minutos	2-3 días	Sí	3-10 minutos	No			Simplemente me olvido y ni da tiempo muchas veces, al comentar cosas del partido con los compañeros, revisar el acta, corregirla si es preciso, ir rellenando el informe del dorso del acta si es necesario, comentar como enfocaremos la siguiente mitad del partido e ir al baño. Todo esto quita mucho tiempo.	Durante el calentamiento inicial, Al finalizar el partido
2021-08-28 19:51:49	Sí	1994-03-20	Hombre	1.65	65	Vilagarcía de Arousa, Pontevedra	Local, Regional/Autonómica	Local (8 años) regional (6 años)	2020-2021	Categoría senior, Categorías inferiores	Entre 5 y 6 partidos semana	Grupo 1	Sí	No	Para mantener o desarrollar la resistencia aeróbica (natación, ciclismo, carrera, saltar a la comba, etc.), Para mantener o desarrollar la fuerza muscular (diferentes técnicas de fortalecimiento muscular con máquinas, con peso libre, con el propio peso corporal, con gomas elásticas, etc.), Para mantener o desarrollar la velocidad (capacidad de realizar sprints en el menor tiempo posible y de repe…	Más de 60 minutos	6-7 días	Sí	5-10 minutos	No			No lo considero necesario al menos en la mayoría de partidos	Durante el calentamiento inicial, Al finalizar el partido
2021-09-04 10:20:33	Sí	1975-06-01	Hombre	178	130	Pamplona	Local, Regional/Autonómica, Nacional	Local y autonómica (14 años), nacional (12 años)	2018-2019	Categoría senior, Categorías inferiores	Entre 3 y 4 partidos/semana	Nacional	No	No	Para mantener o desarrollar la resistencia aeróbica (natación, ciclismo, carrera, saltar a la comba, etc.)	Entre 45 y 60 minutos	1 día	Sí	3-4 minutos	No			Entrar descansado a la segunda mitad del partido	Durante el calentamiento inicial, Al finalizar el partido
2021-09-04 10:40:51	Sí	1975-05-09	Hombre	180	79	San Sebastián	Nacional	20	2020-2021	Categoría senior	1 partido/semana	Acb	Sí	No	Para mantener o desarrollar la resistencia aeróbica (natación, ciclismo, carrera, saltar a la comba, etc.), Para mantener o desarrollar la fuerza muscular (diferentes técnicas de fortalecimiento muscular con máquinas, con peso libre, con el propio peso corporal, con gomas elásticas, etc.), Para mantener o desarrollar la velocidad (capacidad de realizar sprints en el menor tiempo posible y de repe…	Entre 45 y 60 minutos	4-5 días	Sí	30	No			NS NC	Al finalizar el partido
2021-09-04 16:39:19	Sí	1989-12-17	Hombre	173	67	pamplona	Local, Regional/Autonómica, Nacional	2 local, 2 autonómica, 5 nacional	2020-2021	Categoría senior, Categorías inferiores	Entre 4 y 5 partidos/semana	Escuela, regional, autonómico, nacional	Sí	No	Para mantener o desarrollar la resistencia aeróbica (natación, ciclismo, carrera, saltar a la comba, etc.), Para mantener o desarrollar la fuerza muscular (diferentes técnicas de fortalecimiento muscular con máquinas, con peso libre, con el propio peso corporal, con gomas elásticas, etc.), Para mantener o desarrollar la velocidad (capacidad de realizar sprints en el menor tiempo posible y de repe…	Más de 60 minutos	6-7 días	Sí	12 min	No			Descanso y relax muscular	Durante el calentamiento inicial, Al finalizar el partido
2021-09-04 16:45:13	Sí	1972-10-25	Hombre	182	95	Bizkaia	Local, Regional/Autonómica, Nacional	Local (4 años) , autonómica (3 años), Nacional (26 años)	2018-2019	Categoría senior, Categorías inferiores	Entre 3 y 4 partidos/semana	Grupo 3, Federación Vasca	Sí	No	Para mantener o desarrollar la resistencia aeróbica (natación, ciclismo, carrera, saltar a la comba, etc.)	Entre 45 y 60 minutos	2-3 días	No	5 minutos	Sí	Estiramientos y movilidad articular	Volver a preparar los músculos para el ritmo de la segunda parte.		Durante el descanso entre mitades, Al finalizar el partido
2021-09-04 16:45:15	Sí	1976-04-27	Hombre	191	115	Pamplona	Local, Regional/Autonómica, Nacional	13 años (local, regional y nacional)	2018-2019	Categoría senior, Categorías inferiores	Entre 3 y 4 partidos/semana	2018-19 Grupo 4	Sí	No	Para mantener o desarrollar la resistencia aeróbica (natación, ciclismo, carrera, saltar a la comba, etc.), Para mantener o desarrollar la fuerza muscular (diferentes técnicas de fortalecimiento muscular con máquinas, con peso libre, con el propio peso corporal, con gomas elásticas, etc.), Para mantener o desarrollar la velocidad (capacidad de realizar sprints en el menor tiempo posible y de repe…	Más de 60 minutos	4-5 días	Sí	10’	No			No me hace falta. Respiro, bebo agua o alguna otra bebida, o como un plátano… En el vestuario un rato sentado estirando y descansando.	Durante el calentamiento inicial, Durante el descanso entre mitades, Al finalizar el partido
2021-09-04 16:50:54	Sí	2001-11-18	Hombre	183	74	Las Palmas de GC	Regional/Autonómica	Local(4 años), autonómica (3 años)	2018-2019	Categorías inferiores	Entre 6 y 7 partidos semana	Grupo 2 FCB	Sí	No	Para mantener o desarrollar la fuerza muscular (diferentes técnicas de fortalecimiento muscular con máquinas, con peso libre, con el propio peso corporal, con gomas elásticas, etc.)	Más de 60 minutos	4-5 días	Sí	4 minutos	No			Suelo utilizar la mayoría del tiempo para valorar el trabajo realizado.	Al finalizar el partido
2021-09-04 16:50:59	Sí	1995-05-18	Hombre	173	81	Santa Cruz de Tenerife	Local, Regional/Autonómica	Local (8 años), Regional/autonómica (3 años), nacional (sin experiencia) e internacional (sin experiencia)	2019-2020	Categoría senior, Categorías inferiores	7 o más partidos/semana	Grupo 1 Federación Canaria de Baloncesto	No	No	Para mantener o desarrollar la fuerza muscular (diferentes técnicas de fortalecimiento muscular con máquinas, con peso libre, con el propio peso corporal, con gomas elásticas, etc.), Para mantener o desarrollar la velocidad (capacidad de realizar sprints en el menor tiempo posible y de repetirlos el mayor número de veces), Para mantener o desarrollar la flexibilidad (ya sea con el propio cuerpo, …	Entre 15 y 30 minutos	2-3 días	Sí	3-5 minutos	No			Por no darme cuenta de realizarlo	Durante el calentamiento inicial, Durante el descanso entre mitades
2021-09-04 16:51:36	Sí	1994-11-19	Hombre	185	78	Andoain	Regional/Autonómica	Local 8 años y autonomica 4 años	2018-2019	Categoría senior	Entre 6 y 7 partidos semana	Grupo 3	Sí	No	Para mantener o desarrollar la fuerza muscular (diferentes técnicas de fortalecimiento muscular con máquinas, con peso libre, con el propio peso corporal, con gomas elásticas, etc.)	Entre 45 y 60 minutos	4-5 días	Sí	5 minutos	Sí	Estiramientos y movilidad articular	Para que los musculos no se enfrien mucho		Durante el calentamiento inicial, Durante el descanso entre mitades, Al finalizar el partido
2021-09-04 16:53:38	Sí	1998-11-23	Hombre	1.87	73	San Cristóbsl de la Laguna , Tenerife	Regional/Autonómica	Local 7 Autonómico 6	2018-2019	Categoría senior	7 o más partidos/semana	Grupo 2 FCB	Sí	No	Para mantener o desarrollar la flexibilidad (ya sea con el propio cuerpo, ayuda de otra persona, o con elementos como toallas, gomas elásticas, foam roller, etc.)	Entre 15 y 30 minutos	2-3 días	Sí	5-10 min	Sí	Estiramientos y movilidad articular, Técnicas de manejo de la respiración (activación/relajación, conciencia)	El cuerpo se relaja y debido a que vamos a seguir haciendo un gran esfuerzo físico, es bueno volver a reactivar el cuerpo para evitar lesiones		Durante el calentamiento inicial, Durante el descanso entre mitades, Al finalizar el partido
2021-09-04 16:54:17	Sí	2002-01-19	Hombre	173	64	San Cristobal de La Laguna	Regional/Autonómica	Regional/Autonómica 4 años	2019-2020	Categoría senior	Entre 6 y 7 partidos semana	FCB Grupo 2	Sí	No	Para mantener o desarrollar la fuerza muscular (diferentes técnicas de fortalecimiento muscular con máquinas, con peso libre, con el propio peso corporal, con gomas elásticas, etc.), Para mantener o desarrollar la flexibilidad (ya sea con el propio cuerpo, ayuda de otra persona, o con elementos como toallas, gomas elásticas, foam roller, etc.)	Entre 45 y 60 minutos	4-5 días	Sí	8-15 minutos	Sí	Ejercicio de fuerza (saltos, flexiones, etc.), Estiramientos y movilidad articular, Técnicas de manejo de la respiración (activación/relajación, conciencia)	Para no entrar frio y a la vez concentrarme nuevamente		Durante el calentamiento inicial, Durante el descanso entre mitades, Al finalizar el partido
2021-09-04 16:54:48	Sí	1986-09-29	Hombre	186	79	Las Palmas de Gran Canaria	Nacional	Local (2 años), autonómico (3 años), nacional (7 años)	2018-2019	Categoría senior, Categorías inferiores	Entre 5 y 6 partidos semana	Insular, autonómica, GEB Grupo 2	Sí	No	Para mantener o desarrollar la resistencia aeróbica (natación, ciclismo, carrera, saltar a la comba, etc.), Para mantener o desarrollar la fuerza muscular (diferentes técnicas de fortalecimiento muscular con máquinas, con peso libre, con el propio peso corporal, con gomas elásticas, etc.), Para mantener o desarrollar la flexibilidad (ya sea con el propio cuerpo, ayuda de otra persona, o con eleme…	Entre 45 y 60 minutos	4-5 días	Sí	3-4 minutos	No			Falta de tiempo, ya que entre la revisión del acta, ir y volver a vestuario, comentar situaciones con respecto la otra persona …	Durante el calentamiento inicial, Durante el descanso entre mitades
2021-09-04 16:55:10	Sí	1999-08-24	Hombre	179	106	La Orotava, Santa Cruz de Tenerife	Local	Local (3 años), regional/autonómico (sin experiencia), nacional (sin experiencia), internacional (sin experiencia)	2019-2020	Categorías inferiores	Entre 6 y 7 partidos semana	Todas las categorías por debajo de senior (sin incluir) a nivel insular/provincial.	Sí	No	Para mantener o desarrollar la resistencia aeróbica (natación, ciclismo, carrera, saltar a la comba, etc.), Para mantener o desarrollar la fuerza muscular (diferentes técnicas de fortalecimiento muscular con máquinas, con peso libre, con el propio peso corporal, con gomas elásticas, etc.)	Más de 60 minutos	2-3 días	Sí	1-3 minutos	Sí	Estiramientos y movilidad articular	Para no enfriar las articulaciones.		Durante el calentamiento inicial, Durante el descanso entre mitades
2021-09-04 16:55:37	Sí	1967-08-27	Hombre	1/78	75 kg	Logroño la Rioja	Nacional	10 años	2018-2019	Categoría senior	7 o más partidos/semana	Grupo 3	Sí	No	Para mantener o desarrollar la velocidad (capacidad de realizar sprints en el menor tiempo posible y de repetirlos el mayor número de veces)	Entre 45 y 60 minutos	2-3 días	No		No			Prefiero comer algo de fruta y hablar sobre el partido	Al finalizar el partido
2021-09-04 16:55:50	Sí	1994-02-06	Hombre	180	65	Las Palmas de Gran Canaria, Las Palmas	Local, Regional/Autonómica	Local (5 años), regional/autonómica (4 años)	2018-2019	Categorías inferiores	7 o más partidos/semana	Grupo 2 FCB	Sí	No				Sí	3-5 minutos	No			Fisicamente me encuentro bien, y no veo la necesidad de reactivarme, aunque puede que me esté equivocando	Durante el calentamiento inicial, Al finalizar el partido
2021-09-04 16:58:41	Sí	1988-10-04	Hombre	1.73	66	Durango	Regional/Autonómica	Autonómica (12 años) local (14 años)	2020-2021	Categoría senior	Entre 2 y 3 partidos/semana	Grupo 3	Sí	Sí	Para mantener o desarrollar la fuerza muscular (diferentes técnicas de fortalecimiento muscular con máquinas, con peso libre, con el propio peso corporal, con gomas elásticas, etc.)	Entre 45 y 60 minutos	4-5 días	No		No				Durante el calentamiento inicial
2021-09-04 16:58:51	Sí	1993-09-11	Hombre	1.72	72	Las Palmas de Gran Canaria	Regional/Autonómica	Local (5 años), Autonómica (2 años)	2019-2020	Categoría senior, Categorías inferiores	Entre 6 y 7 partidos semana	Grupo 2 FCB	Sí	No	Para mantener o desarrollar la resistencia aeróbica (natación, ciclismo, carrera, saltar a la comba, etc.), Para mantener o desarrollar la fuerza muscular (diferentes técnicas de fortalecimiento muscular con máquinas, con peso libre, con el propio peso corporal, con gomas elásticas, etc.), Para mantener o desarrollar la velocidad (capacidad de realizar sprints en el menor tiempo posible y de repe…	Entre 30 y 45 minutos	2-3 días	Sí	4-6 min	Sí	Ejercicio de fuerza (saltos, flexiones, etc.), Estiramientos y movilidad articular	Después del descanso es un momento crítico que puede que el control del partido sea importante, alguna ventaja en el marcador etc etc		Durante el calentamiento inicial, Durante el descanso entre mitades, Al finalizar el partido
2021-09-04 16:59:15	Sí	1981-04-10	Hombre	175	78	Alegría Dulantzi	Nacional	5 años	2020-2021	Categoría senior	Entre 2 y 3 partidos/semana	Grupo 3	Sí	No	Para mantener o desarrollar la resistencia aeróbica (natación, ciclismo, carrera, saltar a la comba, etc.), Para mantener o desarrollar la fuerza muscular (diferentes técnicas de fortalecimiento muscular con máquinas, con peso libre, con el propio peso corporal, con gomas elásticas, etc.)	Entre 45 y 60 minutos	2-3 días	No		No			Sin costumbre	Al finalizar el partido	Sin costumbre
2021-09-04 16:59:19	Sí	1997-05-18	Hombre	184	83	Barañáin	Local, Regional/Autonómica, Nacional	Local(9años) regional(5años) nacional (4años)	2019-2020	Categoría senior	Entre 2 y 3 partidos/semana	Nacional	Sí	No	Para mantener o desarrollar la resistencia aeróbica (natación, ciclismo, carrera, saltar a la comba, etc.), Para mantener o desarrollar la fuerza muscular (diferentes técnicas de fortalecimiento muscular con máquinas, con peso libre, con el propio peso corporal, con gomas elásticas, etc.)	Entre 45 y 60 minutos	2-3 días	Sí	5 min	No			Me encuentro físicamente activo	Durante el calentamiento inicial
2021-09-04 17:02:25	Sí	1991-11-26	Hombre	1.92	94	Las Palmas	Regional/Autonómica	4 años	2018-2019	Categorías inferiores	Entre 5 y 6 partidos semana	Grupo 2 autonómico e Insular	Sí	Sí	Para mantener o desarrollar la fuerza muscular (diferentes técnicas de fortalecimiento muscular con máquinas, con peso libre, con el propio peso corporal, con gomas elásticas, etc.)	Entre 45 y 60 minutos	4-5 días	Sí	10-15 minutos	Sí	Estiramientos y movilidad articular	Para evitar el enfriamiento rápido de las articulaciones y la activación de los músculos para evitar posibles engarrotamientos o tirones		Durante el calentamiento inicial, Durante el descanso entre mitades		Personally I would add the type of food you consume before each game and in what quantity, if you consume soft drinks often and do any yoga practice or perform extra stretching at home to prevent injuries before or after officiating.
2021-09-04 17:02:40	Sí	1972-12-10	Hombre	1.76	85	Vitoria-gasteiz	Local, Regional/Autonómica, Nacional	Total 33 años experiencia	2018-2019	Categoría senior, Categorías inferiores	Entre 4 y 5 partidos/semana	Grupo 3 pais vasco	Sí	No	Para mantener o desarrollar la resistencia aeróbica (natación, ciclismo, carrera, saltar a la comba, etc.), Para mantener o desarrollar la fuerza muscular (diferentes técnicas de fortalecimiento muscular con máquinas, con peso libre, con el propio peso corporal, con gomas elásticas, etc.), Para mantener o desarrollar la flexibilidad (ya sea con el propio cuerpo, ayuda de otra persona, o con eleme…	Más de 60 minutos	2-3 días	Sí	5-10 minutos	No	Trotar o correr, Estiramientos y movilidad articular		Utilizo el tiempo para otros apartados	Durante el calentamiento inicial, Al finalizar el partido
2021-09-04 17:03:08	Sí	1964-08-03	Hombre	1.83	85	Tenerife	Local, Regional/Autonómica, Nacional	Total 39 años	2020-2021	Categoría senior, Categorías inferiores	Entre 5 y 6 partidos semana	FCB Grupo 2 y FIBT	Sí	No	Para mantener o desarrollar la resistencia aeróbica (natación, ciclismo, carrera, saltar a la comba, etc.)	Más de 60 minutos	2-3 días	Sí	10-15 minutos	Sí	Ejercicio de fuerza (saltos, flexiones, etc.), Estiramientos y movilidad articular	Para intentar mantener el mismo nivel físico y no enfriarme		Durante el calentamiento inicial, Durante el descanso entre mitades
2021-09-04 17:05:50	Sí	1991-11-26	Hombre	184	130	Logroño, La Rioja	Local, Regional/Autonómica	Local 6 años. Regional/autonomica 1 año	2020-2021	Categoría senior, Categorías inferiores	Entre 1 y 2 partidos/semana	La mas baja	Sí	No	Para mantener o desarrollar la resistencia aeróbica (natación, ciclismo, carrera, saltar a la comba, etc.), Para mantener o desarrollar la fuerza muscular (diferentes técnicas de fortalecimiento muscular con máquinas, con peso libre, con el propio peso corporal, con gomas elásticas, etc.), Para mantener o desarrollar otras capacidades (coordinación, equilibrio, agilidad)	Más de 60 minutos	2-3 días	Sí	10-15 mijutos	No			En 10 minutos si ye sientas si que puedes quedarte un poco aletargado, intento mantenerme en movimiento.	Al finalizar el partido		Thank you
2021-09-04 17:06:37	Sí	1970-07-02	Hombre	178	76	Las Palmas de GC. Gran Canaria.	Nacional	Local 25 años, Autonomico 20, Nacional 10 Internacional sin experiencia. Aprox.	2019-2020	Categoría senior, Categorías inferiores	Entre 6 y 7 partidos semana	Benjamin, Mini, PreInf.,Inf, Precadete, Cadete, Junior, Senior(nivel insular) Cad y Junior (Fed. Canaria nivel Autonómico)	Sí	No	Para mantener o desarrollar la fuerza muscular (diferentes técnicas de fortalecimiento muscular con máquinas, con peso libre, con el propio peso corporal, con gomas elásticas, etc.)	Más de 60 minutos	2-3 días	Sí	5-10 minutos.	Sí	Estiramientos y movilidad articular	Pues con 51 años que tengo, estiro entre cuartos para evitar que se me carguen las piernas y en el descanso también.		Durante el calentamiento inicial, En el descanso entre primer y segundo cuarto, Durante el descanso entre mitades, En el descanso entre tercer y último cuarto, Al finalizar el partido		The years are approximate, I've been officiating for a long time and I don't remember exactly. All the best.
2021-09-04 17:12:13	Sí	1995-08-18	Mujer	165	77	logroño, La Rioja	Local, Regional/Autonómica	4 años local, 4 regional	2018-2019	Categoría senior, Categorías inferiores	Entre 5 y 6 partidos semana	Senior	Sí	No	Para mantener o desarrollar la resistencia aeróbica (natación, ciclismo, carrera, saltar a la comba, etc.)	Entre 45 y 60 minutos	4-5 días	No		No				Al finalizar el partido
2021-09-04 17:12:19	Sí	2000-09-27	Hombre	185	90	San Cristóbal de La Laguna	Local	1 año	2019-2020	Categorías inferiores	Entre 2 y 3 partidos/semana	-	Sí	No	Para mantener o desarrollar la resistencia aeróbica (natación, ciclismo, carrera, saltar a la comba, etc.), Para mantener o desarrollar la fuerza muscular (diferentes técnicas de fortalecimiento muscular con máquinas, con peso libre, con el propio peso corporal, con gomas elásticas, etc.)	Más de 60 minutos	4-5 días	Sí	10 minutos	No			Me encuentro bien para continuar	Durante el calentamiento inicial, Al finalizar el partido
2021-09-04 17:13:27	Sí	1982-01-04	Mujer	159	56	Galdar	Local, Regional/Autonómica	7 local 5 regional	2019-2020	Categoría senior, Categorías inferiores	Entre 2 y 3 partidos/semana	De regional para abajo	Sí	No	Para mantener o desarrollar la fuerza muscular (diferentes técnicas de fortalecimiento muscular con máquinas, con peso libre, con el propio peso corporal, con gomas elásticas, etc.)	Entre 45 y 60 minutos	2-3 días	Sí	5 minutos	No			Pues por dejadez quizás	Durante el calentamiento inicial
2021-09-04 17:13:48	Sí	1995-11-21	Mujer	1.63	67	Las Palmas de Gran Canaria	Regional/Autonómica	Autonómicas (5 años)	2018-2019	Categoría senior	7 o más partidos/semana	Desde benjamines hasta senior	Sí	Sí	Para mantener o desarrollar la resistencia aeróbica (natación, ciclismo, carrera, saltar a la comba, etc.), Para mantener o desarrollar la fuerza muscular (diferentes técnicas de fortalecimiento muscular con máquinas, con peso libre, con el propio peso corporal, con gomas elásticas, etc.), Para mantener o desarrollar la velocidad (capacidad de realizar sprints en el menor tiempo posible y de repe…	Más de 60 minutos	4-5 días	No		No			No me suele ser necesario	Durante el calentamiento inicial, Durante el descanso entre mitades
2021-09-04 17:13:59	Sí	2004-02-16	Hombre	185	70	Las Palmas de Gran Canaria	Regional/Autonómica	Local (4 años), regional (1 año), nacional e internacional (sin experiencia)	2018-2019	Categorías inferiores	Entre 3 y 4 partidos/semana	Insular	Sí	Sí	Para mantener o desarrollar la resistencia aeróbica (natación, ciclismo, carrera, saltar a la comba, etc.), Para mantener o desarrollar la fuerza muscular (diferentes técnicas de fortalecimiento muscular con máquinas, con peso libre, con el propio peso corporal, con gomas elásticas, etc.), Para mantener o desarrollar la velocidad (capacidad de realizar sprints en el menor tiempo posible y de repe…	Más de 60 minutos	6-7 días	No		No			No es rutina, simplemente algun movimiento de calentamiento	Nunca	Pereza
2021-09-04 17:14:09	Sí	1995-06-27	Hombre	190	86.5	San Cristóbal de La Laguna, Santa Cruz de Tenerife	Local, Regional/Autonómica	Local (4 años), regional/autonomica (3 años)	2019-2020	Categoría senior, Categorías inferiores	7 o más partidos/semana	Grupo 2 de la FCB, 1° autonomica femenina, categorias seniors locales y categorias base de la provincia	Sí	No	Para mantener o desarrollar la resistencia aeróbica (natación, ciclismo, carrera, saltar a la comba, etc.), Para mantener o desarrollar la fuerza muscular (diferentes técnicas de fortalecimiento muscular con máquinas, con peso libre, con el propio peso corporal, con gomas elásticas, etc.), Para mantener o desarrollar otras capacidades (coordinación, equilibrio, agilidad)	Entre 45 y 60 minutos	4-5 días	Sí	3-5 minutos	Sí	Estiramientos y movilidad articular, Técnicas de manejo de la respiración (activación/relajación, conciencia)	Para no perder el nivel de activacion conseguido durante el partido		Durante el calentamiento inicial, Durante el descanso entre mitades		More than important and necessary aspect on which to work to maintain a good physical condition for the season and avoid possible injuries.
2021-09-04 17:19:48	Sí	1996-09-25	Hombre	184	80	La Orotava	Local	2 años	2020-2021	Categorías inferiores	Entre 3 y 4 partidos/semana	FIBT	No					No		No				Nunca
2021-09-04 17:25:17	Sí	1986-05-12	Hombre	173	74	Tenerife	Regional/Autonómica	Regional 2 años	2019-2020	Categorías inferiores	7 o más partidos/semana	Fibt	Sí	No	Para mantener o desarrollar la resistencia aeróbica (natación, ciclismo, carrera, saltar a la comba, etc.), Para mantener o desarrollar la fuerza muscular (diferentes técnicas de fortalecimiento muscular con máquinas, con peso libre, con el propio peso corporal, con gomas elásticas, etc.), Para mantener o desarrollar la velocidad (capacidad de realizar sprints en el menor tiempo posible y de repe…	Más de 60 minutos	6-7 días	Sí	5 minutos	Sí	Estiramientos y movilidad articular	Volver al 100%		Durante el calentamiento inicial
2021-09-04 17:27:47	Sí	1997-07-29	Mujer	1.7	60	Las Palmas	Local, Regional/Autonómica	Insular (7años), autonomico (4 años)	2020-2021	Categoría senior	Entre 4 y 5 partidos/semana	2º nac	Sí	No	Para mantener o desarrollar la resistencia aeróbica (natación, ciclismo, carrera, saltar a la comba, etc.), Para mantener o desarrollar la fuerza muscular (diferentes técnicas de fortalecimiento muscular con máquinas, con peso libre, con el propio peso corporal, con gomas elásticas, etc.), Para mantener o desarrollar la flexibilidad (ya sea con el propio cuerpo, ayuda de otra persona, o con eleme…	Entre 45 y 60 minutos	4-5 días	Sí		No			Tiempo	Al finalizar el partido
2021-09-04 17:29:33	Sí	1980-07-14	Hombre	1'72	70	Los Llanos de Aridane	Local, Regional/Autonómica	Local 20, Junior autonómico 12, Primera autonómica 3 temporadas	2018-2019	Categoría senior, Categorías inferiores	Entre 3 y 4 partidos/semana	Junior Autonómico y Cadete autonómico	Sí	No	Para mantener o desarrollar la resistencia aeróbica (natación, ciclismo, carrera, saltar a la comba, etc.)	Entre 45 y 60 minutos	2-3 días	Sí	10 min entre estiramiento y calentamiento ( trote, sprint...)	Sí	Estiramientos y movilidad articular	Para evitar volver al inicio del descanso en frio y evitar posible lesión		Durante el calentamiento inicial, Durante el descanso entre mitades, Al finalizar el partido
2021-09-04 17:31:43	Sí	1970-11-25	Hombre	194	100	Vitoria-Gateiz	Nacional	23	2018-2019	Categoría senior	Entre 1 y 2 partidos/semana	FEB	Sí	Sí	Para mantener o desarrollar la resistencia aeróbica (natación, ciclismo, carrera, saltar a la comba, etc.), Para mantener o desarrollar la fuerza muscular (diferentes técnicas de fortalecimiento muscular con máquinas, con peso libre, con el propio peso corporal, con gomas elásticas, etc.), Para mantener o desarrollar la velocidad (capacidad de realizar sprints en el menor tiempo posible y de repe…	Más de 60 minutos	4-5 días	Sí	20	Sí	Estiramientos y movilidad articular, Ejercicios de coordinación y equilibrio, Técnicas de manejo de la respiración (activación/relajación, conciencia)	Rutina de concentración		Durante el calentamiento inicial, Durante el descanso entre mitades, Al finalizar el partido		A pleasure to collaborate for the study and help future referees
2021-09-04 17:32:29	Sí	1996-05-15	Hombre	183	75	Santa Cruz de Tenerife	Local, Regional/Autonómica	Local 1 año regional autonómica (5)	2020-2021	Categoría senior	Entre 5 y 6 partidos semana	Primera división nacional masculina y femenina, junior autonómico	Sí	No	Para mantener o desarrollar la fuerza muscular (diferentes técnicas de fortalecimiento muscular con máquinas, con peso libre, con el propio peso corporal, con gomas elásticas, etc.), Para mantener o desarrollar la velocidad (capacidad de realizar sprints en el menor tiempo posible y de repetirlos el mayor número de veces)	Más de 60 minutos	4-5 días	Sí	5	No			No lo había considerado necesario	Durante el calentamiento inicial, Al finalizar el partido
2021-09-04 17:41:59	Sí	1995-06-23	Hombre	1.87	97	Santa Cruz de Tenerife	Local, Regional/Autonómica	Local: 8 Autonómica: 5	2018-2019	Categoría senior	7 o más partidos/semana	Grupo 1 Autonómico	Sí	No	Para mantener o desarrollar la resistencia aeróbica (natación, ciclismo, carrera, saltar a la comba, etc.), Para mantener o desarrollar la fuerza muscular (diferentes técnicas de fortalecimiento muscular con máquinas, con peso libre, con el propio peso corporal, con gomas elásticas, etc.), Para mantener o desarrollar la velocidad (capacidad de realizar sprints en el menor tiempo posible y de repe…	Más de 60 minutos	6-7 días	Sí	10	Sí	Estiramientos y movilidad articular	Para no volver a la cancha en frío		Durante el calentamiento inicial, Durante el descanso entre mitades
2021-09-04 17:42:45	Sí	1996-02-26	Hombre	177	72	La Orotava, Tenerife	Local, Regional/Autonómica	Local (7 años), regional/autonómica (5 años), nacional (sin experiencia), internacional (sin experiencia)	2018-2019	Categoría senior, Categorías inferiores	Entre 6 y 7 partidos semana	Grupo 1 FCB	Sí	Sí	Para mantener o desarrollar la resistencia aeróbica (natación, ciclismo, carrera, saltar a la comba, etc.), Para mantener o desarrollar la fuerza muscular (diferentes técnicas de fortalecimiento muscular con máquinas, con peso libre, con el propio peso corporal, con gomas elásticas, etc.), Para mantener o desarrollar la velocidad (capacidad de realizar sprints en el menor tiempo posible y de repe…	Más de 60 minutos	6-7 días	Sí	20 minutos	No			Para la recuperación de los músculos	Durante el calentamiento inicial
2021-09-04 17:45:56	Sí	1976-04-16	Hombre	1.83	88	Las Palmas de GC	Local, Regional/Autonómica	Local 20 años y autonomica 12	2019-2020	Categoría senior, Categorías inferiores	Entre 2 y 3 partidos/semana	1 división autonómica	No	No	Para mantener o desarrollar la resistencia aeróbica (natación, ciclismo, carrera, saltar a la comba, etc.)	Entre 15 y 30 minutos	1 día	Sí	20 minutos	Sí	Estiramientos y movilidad articular	Mantener los músculos y articulaciones activas		Durante el calentamiento inicial, Durante el descanso entre mitades, Al finalizar el partido		Thank you so much. The issue of the warm-up before and after the games is something that has been lost, at least in my committee, and it seems to me vital. Greetings.
2021-09-04 17:46:25	Sí	1988-03-07	Hombre	183	79	La Rioja	Local, Regional/Autonómica	3	2020-2021	Categoría senior, Categorías inferiores	Entre 1 y 2 partidos/semana	Junior senior 2 división	Sí	No	Para mantener o desarrollar la velocidad (capacidad de realizar sprints en el menor tiempo posible y de repetirlos el mayor número de veces), Para mantener o desarrollar la flexibilidad (ya sea con el propio cuerpo, ayuda de otra persona, o con elementos como toallas, gomas elásticas, foam roller, etc.), Para mantener o desarrollar otras capacidades (coordinación, equilibrio, agilidad)	Menos de 15 minutos	2-3 días	Sí	8 minutos	No	Trotar o correr, Correr a máxima velocidad (esprintar), Ejercicio de fuerza (saltos, flexiones, etc.), Estiramientos y movilidad articular			Durante el calentamiento inicial
2021-09-04 17:47:48	Sí	1998-12-21	Mujer	170	73	Las Palmas de Gran Canaria	Local, Regional/Autonómica	Local (2años), regional/autonomica (1 año), nacional (sin experiencia), internacional (sin experiencia)	2019-2020	Categorías inferiores	7 o más partidos/semana	2019/2020 Categoria local	Sí	No	Para mantener o desarrollar la resistencia aeróbica (natación, ciclismo, carrera, saltar a la comba, etc.), Para mantener o desarrollar la fuerza muscular (diferentes técnicas de fortalecimiento muscular con máquinas, con peso libre, con el propio peso corporal, con gomas elásticas, etc.)	Entre 45 y 60 minutos	4-5 días	Sí	2-3 minutos	No	Trotar o correr, Correr a máxima velocidad (esprintar), Estiramientos y movilidad articular		Falta de costumbre	Durante el calentamiento inicial, Al finalizar el partido
2021-09-04 18:24:31	Sí	1968-02-08	Hombre	180	85	Logroño	Nacional	6 años	2018-2019	Categoría senior	Entre 2 y 3 partidos/semana	Segunda división nacional	Sí	No	Para mantener o desarrollar la resistencia aeróbica (natación, ciclismo, carrera, saltar a la comba, etc.)	Más de 60 minutos	4-5 días	Sí	20 minutos	No			Por descanso	Durante el calentamiento inicial
2021-09-04 18:55:15	Sí	1969-01-30	Hombre	177	90	Lasarte-oria guipuzcoa	Local, Regional/Autonómica, Nacional	36	2019-2020	Categoría senior	Entre 6 y 7 partidos semana	1 div masc.autonomica senior juni9r cadete infantiles mini	Sí	No	Para mantener o desarrollar la resistencia aeróbica (natación, ciclismo, carrera, saltar a la comba, etc.)	Más de 60 minutos	2-3 días	Sí	15 m	No			No creo que lo necesito	Durante el calentamiento inicial
2021-09-04 19:13:39	Sí	1994-02-22	Mujer	167	74	Tenerife	Local, Regional/Autonómica	Insular 4 años, autonómica 3 años	2019-2020	Categoría senior, Categorías inferiores	Entre 5 y 6 partidos semana	Autonómica, grupo 2 FCB	Sí	Sí	Para mantener o desarrollar la resistencia aeróbica (natación, ciclismo, carrera, saltar a la comba, etc.), Para mantener o desarrollar la fuerza muscular (diferentes técnicas de fortalecimiento muscular con máquinas, con peso libre, con el propio peso corporal, con gomas elásticas, etc.), Para mantener o desarrollar la velocidad (capacidad de realizar sprints en el menor tiempo posible y de repe…	Más de 60 minutos	4-5 días	No		Sí	Estiramientos y movilidad articular		Descanso, poco tiempo entre mitades, no me he enfriado	Durante el calentamiento inicial
2021-09-04 19:15:58	Sí	1969-12-19	Hombre	187	95	Pamplona	Nacional	local (1) Autonómica (10) Nacional (2)	2020-2021	Categoría senior	Entre 3 y 4 partidos/semana	grupo 3	Sí	No	Para mantener o desarrollar la fuerza muscular (diferentes técnicas de fortalecimiento muscular con máquinas, con peso libre, con el propio peso corporal, con gomas elásticas, etc.)	Entre 30 y 45 minutos	2-3 días	Sí	10 minutos	No			No suelo necesitar para la reactivación	Durante el calentamiento inicial
2021-09-04 19:27:28	Sí	1993-01-01	Hombre	173	74	La Rioja	Nacional	Nacional 14 años	2018-2019	Categoría senior	Entre 4 y 5 partidos/semana	Grupo 3	Sí	No	Para mantener o desarrollar la resistencia aeróbica (natación, ciclismo, carrera, saltar a la comba, etc.), Para mantener o desarrollar la fuerza muscular (diferentes técnicas de fortalecimiento muscular con máquinas, con peso libre, con el propio peso corporal, con gomas elásticas, etc.), Para mantener o desarrollar la velocidad (capacidad de realizar sprints en el menor tiempo posible y de repe…	Entre 30 y 45 minutos	2-3 días	Sí	10-15 min	No				Durante el calentamiento inicial
2021-09-04 20:26:40	Sí	1998-05-24	Hombre	1.84	83	Las palmas de Gran Canaria	Regional/Autonómica	Regional (2 años), autonómico (3 años), internacional (sin experiencia)	2020-2021	Categoría senior	Entre 5 y 6 partidos semana	2020/2021 primera nacional	Sí	No	Para mantener o desarrollar la resistencia aeróbica (natación, ciclismo, carrera, saltar a la comba, etc.), Para mantener o desarrollar la fuerza muscular (diferentes técnicas de fortalecimiento muscular con máquinas, con peso libre, con el propio peso corporal, con gomas elásticas, etc.)	Más de 60 minutos	4-5 días	Sí	3 minutos	Sí	Ejercicio de fuerza (saltos, flexiones, etc.), Estiramientos y movilidad articular		Simplemente porque me enfrio y necesito entrar otra vez en calor.	Durante el calentamiento inicial, Al finalizar el partido
2021-09-04 20:38:08	Sí	2000-12-30	Hombre	180	75	las palmas	Regional/Autonómica	1 año local 1 autonomico	2020-2021	Categorías inferiores	7 o más partidos/semana	autonomico junior y cadete, local desde benjamín hasta sub22	Sí	No	Para mantener o desarrollar la resistencia aeróbica (natación, ciclismo, carrera, saltar a la comba, etc.), Para mantener o desarrollar la fuerza muscular (diferentes técnicas de fortalecimiento muscular con máquinas, con peso libre, con el propio peso corporal, con gomas elásticas, etc.), Para mantener o desarrollar la velocidad (capacidad de realizar sprints en el menor tiempo posible y de repe…	Más de 60 minutos	6-7 días	Sí	15 minutos	Sí	Estiramientos y movilidad articular	para reanudar el partido con un entorno térmico corporal favorable		Durante el calentamiento inicial, Durante el descanso entre mitades, Al finalizar el partido
2021-09-04 20:45:41	Sí	1963-10-02	Hombre	1.83	78	Puerto del Rosario	Regional/Autonómica	37	2019-2020	Categoría senior, Categorías inferiores	Entre 3 y 4 partidos/semana	Senior y Automática	Sí	No	Para mantener o desarrollar otras capacidades (coordinación, equilibrio, agilidad)	Más de 60 minutos	2-3 días	Sí	15 minutos	Sí	Estiramientos y movilidad articular	Para que el cuerpo no se enfríe		Durante el calentamiento inicial, Durante el descanso entre mitades
2021-09-04 20:53:11	Sí	1998-09-01	Hombre	195	83	Santa Cruz de Tenerife	Regional/Autonómica	Local (5 años), autonómica (3 años)	2020-2021	Categoría senior, Categorías inferiores	Entre 5 y 6 partidos semana	FCB Grupo 2	Sí	No	Para mantener o desarrollar la resistencia aeróbica (natación, ciclismo, carrera, saltar a la comba, etc.), Para mantener o desarrollar la fuerza muscular (diferentes técnicas de fortalecimiento muscular con máquinas, con peso libre, con el propio peso corporal, con gomas elásticas, etc.)	Más de 60 minutos	6-7 días	Sí	5 minutos	No	Trotar o correr, Estiramientos y movilidad articular			Durante el calentamiento inicial, Al finalizar el partido
2021-09-04 20:55:38	Sí	2000-07-22	Hombre	183	83	Puerto de la Cruz	Local, Regional/Autonómica	1 año	2020-2021	Categorías inferiores	1 partido/semana	FIBT	Sí	No	Para mantener o desarrollar la resistencia aeróbica (natación, ciclismo, carrera, saltar a la comba, etc.), Para mantener o desarrollar la fuerza muscular (diferentes técnicas de fortalecimiento muscular con máquinas, con peso libre, con el propio peso corporal, con gomas elásticas, etc.)	Más de 60 minutos	6-7 días	No		Sí	Estiramientos y movilidad articular	Evitar lesiones musculares		Durante el calentamiento inicial, Durante el descanso entre mitades
2021-09-04 21:05:08	Sí	1987-02-06	Hombre	177	99	Castillo del romeral	Local, Regional/Autonómica	Local(17) regional (5)	2005	Categoría senior, Categorías inferiores	Entre 5 y 6 partidos semana	Grupo 2	Sí	No	Para mantener o desarrollar la velocidad (capacidad de realizar sprints en el menor tiempo posible y de repetirlos el mayor número de veces)	Entre 15 y 30 minutos	2-3 días	No		Sí	Estiramientos y movilidad articular	No atrofiar musculatura		Durante el descanso entre mitades		The questionnaire is fine
2021-09-04 21:10:28	Sí	1997-08-13	Hombre	185	94	Tenerife , Santiago del Teide	Local, Regional/Autonómica	Local 2 autonómica 1	2018-2019	Categoría senior, Categorías inferiores	7 o más partidos/semana	FCB grupo 3	Sí	Sí	Para mantener o desarrollar la resistencia aeróbica (natación, ciclismo, carrera, saltar a la comba, etc.), Para mantener o desarrollar la fuerza muscular (diferentes técnicas de fortalecimiento muscular con máquinas, con peso libre, con el propio peso corporal, con gomas elásticas, etc.)	Más de 60 minutos	4-5 días	Sí	10 min	Sí	Estiramientos y movilidad articular, Técnicas de manejo de la respiración (activación/relajación, conciencia)	Concentración		Durante el calentamiento inicial, Durante el descanso entre mitades
2021-09-04 21:45:28	Sí	1966-01-18	Hombre	1.73	64	Santa Lucía	Regional/Autonómica	Local 9 autonómico 4	2018-2019	Categoría senior, Categorías inferiores	7 o más partidos/semana	No e arbitrado para feb	Sí	No	Para mantener o desarrollar la resistencia aeróbica (natación, ciclismo, carrera, saltar a la comba, etc.)	Entre 45 y 60 minutos	2-3 días	Sí	4 minutos	No				Durante el calentamiento inicial, Al finalizar el partido
2021-09-04 21:55:16	Sí	1997-12-01	Hombre	1.83	73	Las palmas	Regional/Autonómica	Regional y autonomico (11 años)	2019-2020	Categoría senior	Entre 5 y 6 partidos semana	Grupo 2	Sí	No				Sí	(20 minutos)	No	Trotar o correr, Correr a máxima velocidad (esprintar), Estiramientos y movilidad articular, Otras			Durante el calentamiento inicial, Durante el descanso entre mitades	Para evitar lesiones y coger ritmo para el comenzar bien el partido.
2021-09-04 23:26:13	Sí	1977-11-15	Mujer	1.70	67	Santa Cruz de Tenerife	Local, Regional/Autonómica	Local (30 años) Autonomica 20( años)	2018-2019	Categoría senior, Categorías inferiores	Entre 6 y 7 partidos semana	Autonomica	Sí	No	Para mantener o desarrollar la velocidad (capacidad de realizar sprints en el menor tiempo posible y de repetirlos el mayor número de veces), Para mantener o desarrollar la flexibilidad (ya sea con el propio cuerpo, ayuda de otra persona, o con elementos como toallas, gomas elásticas, foam roller, etc.), Para mantener o desarrollar otras capacidades (coordinación, equilibrio, agilidad)	Entre 30 y 45 minutos	2-3 días	Sí	10 minutos	Sí	Técnicas de manejo de la respiración (activación/relajación, conciencia)	Para no volver a arrancar fria		Durante el calentamiento inicial, Al finalizar el partido
2021-09-05 00:02:53	Sí	2001-07-12	Hombre	188	74	Bilbao, bizkaia	Local	local (3 años)	2018-2019	Categoría senior	Entre 3 y 4 partidos/semana	Grupo 6	Sí	No	Para mantener o desarrollar la resistencia aeróbica (natación, ciclismo, carrera, saltar a la comba, etc.), Para mantener o desarrollar la velocidad (capacidad de realizar sprints en el menor tiempo posible y de repetirlos el mayor número de veces), Para mantener o desarrollar otras capacidades (coordinación, equilibrio, agilidad)	Más de 60 minutos	4-5 días	Sí	10-15 mins	No			Porque no lo necesito.	Durante el calentamiento inicial
2021-09-05 13:36:35	Sí	2001-10-28	Mujer	1.58	56	Corralejo	Local	2años	2017-2018	Categorías inferiores	1 partido/semana	Grupo 2	Sí	No	Para mantener o desarrollar la resistencia aeróbica (natación, ciclismo, carrera, saltar a la comba, etc.)	Entre 30 y 45 minutos	2-3 días	No		Sí	Estiramientos y movilidad articular			Al finalizar el partido
2021-09-05 14:02:41	Sí	2000-02-06	Hombre	181	72	Puerto del rosario	Local, Regional/Autonómica	Local (4 años) autonómica (1 año)	2019-2020	Categorías inferiores	Entre 2 y 3 partidos/semana	Grupo 2	Sí	No	Para mantener o desarrollar la resistencia aeróbica (natación, ciclismo, carrera, saltar a la comba, etc.), Para mantener o desarrollar la fuerza muscular (diferentes técnicas de fortalecimiento muscular con máquinas, con peso libre, con el propio peso corporal, con gomas elásticas, etc.)	Más de 60 minutos	4-5 días	Sí	5 minutos aprox.	Sí	Trotar o correr, Estiramientos y movilidad articular	Para prevenir lesiones		Al finalizar el partido
2021-09-06 16:04:37	Sí	2003-01-25	Hombre	183	90	La Orotava, Sants Cruz de Tenerife	Local	Local (2 años)	2019-2020	Categorías inferiores	Entre 2 y 3 partidos/semana	Minibasket, Infantil, Cadete y Junior	Sí	No	Para mantener o desarrollar la fuerza muscular (diferentes técnicas de fortalecimiento muscular con máquinas, con peso libre, con el propio peso corporal, con gomas elásticas, etc.)	Más de 60 minutos	4-5 días	No		No			Coordinación con el equipo.	Al finalizar el partido
2021-09-06 21:23:14	Sí	1968-02-19	Mujer	1.71	78.00	Santa Cruz de Tenerife	Regional/Autonómica	Local 20 años regional / autonómica 2 años nacional sin experiencia internacional sin experiencia	2018-2019	Categoría senior, Categorías inferiores	Entre 4 y 5 partidos/semana	Local	Sí	No	Para mantener o desarrollar la resistencia aeróbica (natación, ciclismo, carrera, saltar a la comba, etc.), Para mantener o desarrollar la velocidad (capacidad de realizar sprints en el menor tiempo posible y de repetirlos el mayor número de veces)	Entre 45 y 60 minutos	2-3 días	Sí	5-10 minutos	No			Hay pocos lugares donde se pueda hacer. Si tienes varios partidos reservas fuerzas	Durante el calentamiento inicial, Al finalizar el partido		A protocol of stretching exercises and exercises for the break of the game would be fine to put them into practice
2021-09-10 12:03:35	Sí	1990-08-30	Mujer	169	57	Sevilla	Nacional	local (9 años), autonómica (7 años), nacional (6años), internacional (sin experencia)	2018-2019	Categoría senior	Entre 2 y 3 partidos/semana	FEB grupo 2	Sí	No	Para mantener o desarrollar la fuerza muscular (diferentes técnicas de fortalecimiento muscular con máquinas, con peso libre, con el propio peso corporal, con gomas elásticas, etc.)	Entre 30 y 45 minutos	2-3 días	No		No			Hasta ahora no he sentido que lo necesitará	Durante el calentamiento inicial, Al finalizar el partido
2021-09-10 12:27:06	Sí	1998-09-14	Hombre	175	76	Sevilla	Local, Regional/Autonómica	Local 7 años Autonómica 3 años	2020-2021	Categoría senior, Categorías inferiores	Entre 1 y 2 partidos/semana	Nacional 1 y provincial	Sí	No	Para mantener o desarrollar la resistencia aeróbica (natación, ciclismo, carrera, saltar a la comba, etc.), Para mantener o desarrollar la fuerza muscular (diferentes técnicas de fortalecimiento muscular con máquinas, con peso libre, con el propio peso corporal, con gomas elásticas, etc.), Para mantener o desarrollar otras capacidades (coordinación, equilibrio, agilidad)	Más de 60 minutos	4-5 días	Sí	5-7 minutos	No			No lo he necesitado hasta el momento para mantener la concentración.	Durante el calentamiento inicial, Al finalizar el partido
2021-09-10 12:29:21	Sí	1996-11-15	Hombre	171	69	Prado del Rey, Cádiz	Local	Local (4 años)	2018-2019	Categoría senior, Categorías inferiores	Entre 5 y 6 partidos semana	Provincial FAB Sevilla	Sí	No	Para mantener o desarrollar la resistencia aeróbica (natación, ciclismo, carrera, saltar a la comba, etc.), Para mantener o desarrollar la fuerza muscular (diferentes técnicas de fortalecimiento muscular con máquinas, con peso libre, con el propio peso corporal, con gomas elásticas, etc.), Para mantener o desarrollar otras capacidades (coordinación, equilibrio, agilidad)	Más de 60 minutos	4-5 días	Sí	5 minutos	No			La costumbre	Durante el calentamiento inicial
2021-09-10 12:32:49	Sí	1984-06-11	Hombre	1.74	88	Albaida del Aljarafe (Sevilla)	Regional/Autonómica	Local (18 años), Autonomica (13 años) Nacional (sin experiencia) Internacional (sin experiencia)	2018-2019	Categoría senior	Entre 1 y 2 partidos/semana	Autonomica	Sí	No	Para mantener o desarrollar la resistencia aeróbica (natación, ciclismo, carrera, saltar a la comba, etc.), Para mantener o desarrollar la velocidad (capacidad de realizar sprints en el menor tiempo posible y de repetirlos el mayor número de veces)	Entre 45 y 60 minutos	2-3 días	Sí	5-10 minutos	No			Falta de tiempo, pereza etc..	Durante el descanso entre mitades, Al finalizar el partido
2021-09-10 12:39:18	Sí	1994-10-07	Hombre	1.78	79	Pilas (Sevilla)	Nacional	Local (4 años), Nacional (4 años)	2020-2021	Categoría senior	Entre 3 y 4 partidos/semana	1 Nacional	Sí	No	Para mantener o desarrollar la fuerza muscular (diferentes técnicas de fortalecimiento muscular con máquinas, con peso libre, con el propio peso corporal, con gomas elásticas, etc.), Para mantener o desarrollar la flexibilidad (ya sea con el propio cuerpo, ayuda de otra persona, o con elementos como toallas, gomas elásticas, foam roller, etc.)	Más de 60 minutos	4-5 días	Sí	15 minutos	No			No tengo	Durante el calentamiento inicial, Al finalizar el partido
2021-09-10 12:41:23	Sí	1993-03-12	Hombre	183	74	Sevilla	Local, Regional/Autonómica	Local (11 años), autonómica (4), temporadas totales 11	2018-2019	Categoría senior, Categorías inferiores	Entre 2 y 3 partidos/semana	Provincial o local y autonómica	Sí	No	Para mantener o desarrollar la resistencia aeróbica (natación, ciclismo, carrera, saltar a la comba, etc.), Para mantener o desarrollar la fuerza muscular (diferentes técnicas de fortalecimiento muscular con máquinas, con peso libre, con el propio peso corporal, con gomas elásticas, etc.)	Más de 60 minutos	6-7 días	Sí	20 minutos	No			Al encontrarme mejor físicamente de las exigencias del partido, no he considerado realizar dichos ejercicios.	Durante el calentamiento inicial, Al finalizar el partido
2021-09-10 12:47:06	Sí	1998-03-05	Hombre	175	58	Sevilla	Local, Regional/Autonómica	Local (7 años), regional (2 partidos)	2019-2020	Categoría senior, Categorías inferiores	Entre 4 y 5 partidos/semana	Provincial y 1ª Nacional	Sí	No	Para mantener o desarrollar la resistencia aeróbica (natación, ciclismo, carrera, saltar a la comba, etc.)	Entre 15 y 30 minutos	2-3 días	No	20-40 minutos	No	Trotar o correr			Durante el calentamiento inicial
2021-09-10 13:14:52	Sí	1971-07-15	Hombre	176	71	Mairena del aljarafe Sevilla	Local, Regional/Autonómica, Nacional	Local 23años, regional/autonómica 12 años, nacional 5 años	2018-2019	Categoría senior, Categorías inferiores	Entre 1 y 2 partidos/semana	Provincial	Sí	No	Para mantener o desarrollar la resistencia aeróbica (natación, ciclismo, carrera, saltar a la comba, etc.), Para mantener o desarrollar la fuerza muscular (diferentes técnicas de fortalecimiento muscular con máquinas, con peso libre, con el propio peso corporal, con gomas elásticas, etc.)	Más de 60 minutos	2-3 días	Sí	3-5 minutos	Sí	Estiramientos y movilidad articular	Para paliar posibles lesiones y activar concentración		Durante el calentamiento inicial, Durante el descanso entre mitades, Al finalizar el partido		Thank the initiative and offer my experience without severe injuries and years of officiating maintaining an acceptable physical condition
2021-09-10 13:19:23	Sí	1990-07-23	Hombre	190	85	Almeria	Nacional	Local 6 años regional 2 nacional 2	2020-2021	Categoría senior	Entre 1 y 2 partidos/semana	Grupo 2	Sí	No	Para mantener o desarrollar la resistencia aeróbica (natación, ciclismo, carrera, saltar a la comba, etc.), Para mantener o desarrollar la fuerza muscular (diferentes técnicas de fortalecimiento muscular con máquinas, con peso libre, con el propio peso corporal, con gomas elásticas, etc.), Para mantener o desarrollar la velocidad (capacidad de realizar sprints en el menor tiempo posible y de repe…	Más de 60 minutos	4-5 días	Sí	5-10minutos	No	Trotar o correr, Correr a máxima velocidad (esprintar), Ejercicio de fuerza (saltos, flexiones, etc.), Estiramientos y movilidad articular		Pereza, falta de tiempo	Al finalizar el partido
2021-09-10 13:31:32	Sí	1985-03-10	Hombre	177	80	Madrid	Local, Regional/Autonómica	Local (18), Regional/Autonómica (14)	2018-2019	Categoría senior, Categorías inferiores	Entre 4 y 5 partidos/semana	1ª Autonómica / 2ª Autonomica / Provincial	Sí	No	Para mantener o desarrollar la fuerza muscular (diferentes técnicas de fortalecimiento muscular con máquinas, con peso libre, con el propio peso corporal, con gomas elásticas, etc.)	Entre 45 y 60 minutos	1 día	Sí	10 minutos	No			Falta de tiempo entre descanso / coordinación con la mesa	Durante el calentamiento inicial, Al finalizar el partido
2021-09-10 13:39:57	Sí	1992-01-20	Hombre	180	80	Sevilla	Local, Nacional	Local 10 y 2 en nacional	2018-2019	Categoría senior, Categorías inferiores	Entre 4 y 5 partidos/semana	Provincial y nacional	Sí	Sí	Para mantener o desarrollar la resistencia aeróbica (natación, ciclismo, carrera, saltar a la comba, etc.), Para mantener o desarrollar la fuerza muscular (diferentes técnicas de fortalecimiento muscular con máquinas, con peso libre, con el propio peso corporal, con gomas elásticas, etc.), Para mantener o desarrollar la velocidad (capacidad de realizar sprints en el menor tiempo posible y de repe…	Más de 60 minutos	6-7 días	Sí	10 minutos	No	Trotar o correr, Correr a máxima velocidad (esprintar), Estiramientos y movilidad articular, Técnicas de manejo de la respiración (activación/relajación, conciencia)		Por qué tiene que estar activado desde que entras por la puerta del polideportivo	Durante el calentamiento inicial, Durante el descanso entre mitades, Al finalizar el partido
2021-09-10 16:24:26	Sí	2000-02-19	Hombre	190	86	Sevilla	Local	Local desde los 18 años hasta la actualidad (21 años)	2020-2021	Categoría senior, Categorías inferiores	Entre 5 y 6 partidos semana	Provincial sevilla	Sí	No	Para mantener o desarrollar la resistencia aeróbica (natación, ciclismo, carrera, saltar a la comba, etc.), Para mantener o desarrollar la fuerza muscular (diferentes técnicas de fortalecimiento muscular con máquinas, con peso libre, con el propio peso corporal, con gomas elásticas, etc.), Para mantener o desarrollar otras capacidades (coordinación, equilibrio, agilidad)	Más de 60 minutos	4-5 días	No		Sí	Estiramientos y movilidad articular, Técnicas de manejo de la respiración (activación/relajación, conciencia)	No perder la conexión con el partido y mantener la línea de trabajo		Durante el calentamiento inicial, Durante el descanso entre mitades, Al finalizar el partido
2021-09-10 16:28:33	Sí	1996-03-23	Hombre	178	88	Sevilla	Regional/Autonómica	Local 3 años, autonómico 1 año	2018-2019	Categoría senior, Categorías inferiores	Entre 3 y 4 partidos/semana	Local y automomico	Sí	No	Para mantener o desarrollar otras capacidades (coordinación, equilibrio, agilidad)	Más de 60 minutos	2-3 días	Sí	10-15 minutos	No			Considero que tengo la suficiente tensión para empezar la segunda parte, y no necesito sobrecargarme.	Durante el calentamiento inicial		It seems to me a good way to know what kind of protocols we use before, during and after finishing the game, I consider it constructive.
2021-09-11 15:23:31	Sí	1998-08-16	Hombre	191	85	Pamplona, Navarra	Local, Regional/Autonómica, Nacional	Local (6 años), Regional (2 años), Nacional (2 años)	2020-2021	Categoría senior	Entre 3 y 4 partidos/semana	G4	Sí	No	Para mantener o desarrollar la resistencia aeróbica (natación, ciclismo, carrera, saltar a la comba, etc.), Para mantener o desarrollar la fuerza muscular (diferentes técnicas de fortalecimiento muscular con máquinas, con peso libre, con el propio peso corporal, con gomas elásticas, etc.), Para mantener o desarrollar otras capacidades (coordinación, equilibrio, agilidad)	Entre 45 y 60 minutos	4-5 días	Sí	8 minutos.	No			El tiempo únicamente lo uso para descansar.	Durante el calentamiento inicial, Al finalizar el partido
2021-09-11 15:28:11	Sí	1988-01-19	Hombre	188	78	PAMPLONA, NAVARRA	Local, Regional/Autonómica, Nacional	Local (5 años) Regional/Autonómica (3 años) Nacional (3 años)	2020-2021	Categoría senior, Categorías inferiores	Entre 4 y 5 partidos/semana	FEB Grupo 3 (EBA y LF2) 1 División, 2 División, Senior Autonómico, Junior Autonómico, Cadete, Infantil, Preinfantil, Mini, Premini	Sí	No	Para mantener o desarrollar la resistencia aeróbica (natación, ciclismo, carrera, saltar a la comba, etc.)	Entre 30 y 45 minutos	2-3 días	Sí	5-10 minutos	No			Como mucho puedo estirar un poco, y golpearme las piernas para calentarlas, pero no hago lo mismo que en el calentamiento prepartido.	Durante el calentamiento inicial, Durante el descanso entre mitades, Al finalizar el partido
2021-09-11 15:58:00	Sí	1996-11-27	Hombre	181	82	Pamplona, Navarra	Local, Regional/Autonómica	Local 3 años, autonómica 1	2020-2021	Categorías inferiores	Entre 3 y 4 partidos/semana	Escuela navarra de árbitros (junior 2ª división)	Sí	No	Para mantener o desarrollar la resistencia aeróbica (natación, ciclismo, carrera, saltar a la comba, etc.), Para mantener o desarrollar la fuerza muscular (diferentes técnicas de fortalecimiento muscular con máquinas, con peso libre, con el propio peso corporal, con gomas elásticas, etc.)	Más de 60 minutos	4-5 días	Sí	3-5 minutos	No			No queda demasiado tiempo para ello	Durante el calentamiento inicial, Al finalizar el partido	Favorecer la recuperación muscular, evitar lesiones, pinchazos, dolos articular...
2021-09-11 17:24:58	Sí	1988-08-11	Hombre	186	79	Sevilla	Local, Regional/Autonómica, Nacional	Local (6 años). Regional (5 años). Nacional (5 años)	2019-2020	Categoría senior, Categorías inferiores	1 partido/semana	Grupo 1	Sí	No	Para mantener o desarrollar la resistencia aeróbica (natación, ciclismo, carrera, saltar a la comba, etc.), Para mantener o desarrollar la fuerza muscular (diferentes técnicas de fortalecimiento muscular con máquinas, con peso libre, con el propio peso corporal, con gomas elásticas, etc.)	Entre 45 y 60 minutos	2-3 días	No		No				Durante el calentamiento inicial
2021-09-11 17:48:02	Sí	1995-03-27	Hombre	183	76	Alcalá de Guadaíra, Sevilla	Local, Regional/Autonómica, Nacional	Regional/ Autonómica (5 años) Nacional (1año)	2020-2021	Categoría senior, Categorías inferiores	Entre 4 y 5 partidos/semana	Nacional	Sí	No	Para mantener o desarrollar la resistencia aeróbica (natación, ciclismo, carrera, saltar a la comba, etc.), Para mantener o desarrollar la fuerza muscular (diferentes técnicas de fortalecimiento muscular con máquinas, con peso libre, con el propio peso corporal, con gomas elásticas, etc.)	Más de 60 minutos	4-5 días	Sí	5-6 minutos	Sí	Técnicas de manejo de la respiración (activación/relajación, conciencia)	Para intentar mantener el nivel mental predescanso	Falta de tiempo	Durante el calentamiento inicial
2021-09-12 12:38:07	Sí	1995-08-17	Hombre	184	85	Pamplona	Regional/Autonómica	Regional 8	2018-2019	Categoría senior	Entre 4 y 5 partidos/semana	Grupo 4	Sí	No	Para mantener o desarrollar la fuerza muscular (diferentes técnicas de fortalecimiento muscular con máquinas, con peso libre, con el propio peso corporal, con gomas elásticas, etc.)	Más de 60 minutos	4-5 días	Sí	Primero carrera para entrar en calor y subir un poco las pulsaciones y después ejercicios de movilidad y algo de estiramiento	No			Porque durante el descanso no me enfrio completamente y en un par de jugadas vuelvo estar caliente	Al finalizar el partido
2021-09-12 13:50:30	Sí	1985-09-17	Hombre	183	72	Madrid	Local, Regional/Autonómica, Nacional	Local 17 Nacional 3	2018-2019	Categoría senior, Categorías inferiores	Entre 4 y 5 partidos/semana	Nacional	Sí	No	Para mantener o desarrollar la resistencia aeróbica (natación, ciclismo, carrera, saltar a la comba, etc.), Para mantener o desarrollar la fuerza muscular (diferentes técnicas de fortalecimiento muscular con máquinas, con peso libre, con el propio peso corporal, con gomas elásticas, etc.), Para mantener o desarrollar la velocidad (capacidad de realizar sprints en el menor tiempo posible y de repe…	Entre 30 y 45 minutos	4-5 días	Sí	5 minutos	No			De momento, no lo veo necesario.	Durante el calentamiento inicial, Al finalizar el partido
2021-09-12 13:56:19	Sí	1994-04-18	Hombre	184	80	Madrid	Local, Regional/Autonómica	3 local, 4 autonomica	2018-2019	Categoría senior	Entre 4 y 5 partidos/semana	1a Autonomica	Sí	Sí	Para mantener o desarrollar la resistencia aeróbica (natación, ciclismo, carrera, saltar a la comba, etc.), Para mantener o desarrollar la fuerza muscular (diferentes técnicas de fortalecimiento muscular con máquinas, con peso libre, con el propio peso corporal, con gomas elásticas, etc.), Para mantener o desarrollar la velocidad (capacidad de realizar sprints en el menor tiempo posible y de repe…	Entre 45 y 60 minutos	4-5 días	Sí	10-15 minutos	No			Falta de tiempo	Durante el calentamiento inicial		Luck
2021-09-12 13:59:25	Sí	1998-09-17	Hombre	1'67	61	Torrejón de Ardoz	Local, Regional/Autonómica	Local (7 años), regional/autonómica (6 años)	2018-2019	Categoría senior	Entre 5 y 6 partidos semana	Primera autonómica. Segunda autonómica. Y categorías de formación desde Benjamín hasta sub-21	Sí	No	Para mantener o desarrollar la fuerza muscular (diferentes técnicas de fortalecimiento muscular con máquinas, con peso libre, con el propio peso corporal, con gomas elásticas, etc.)	Entre 45 y 60 minutos	2-3 días	Sí	5-10 minutos	No			No tengo la rutina de hacerlo	Durante el calentamiento inicial
2021-09-12 14:04:39	Sí	1996-08-04	Mujer	169	61	Madrid	Regional/Autonómica	Regional / Autonómica (6 años )	2019-2020	Categoría senior	Entre 2 y 3 partidos/semana	Primera Nacional Madrid	Sí	No	Para mantener o desarrollar la resistencia aeróbica (natación, ciclismo, carrera, saltar a la comba, etc.), Para mantener o desarrollar la fuerza muscular (diferentes técnicas de fortalecimiento muscular con máquinas, con peso libre, con el propio peso corporal, con gomas elásticas, etc.)	Entre 45 y 60 minutos	4-5 días	Sí	5-10 minutos	No				Durante el calentamiento inicial
2021-09-12 14:07:00	Sí	1997-01-09	Hombre	1.84	87 Kilos	Madrid	Regional/Autonómica	6 años en categorías autonómicas	2020-2021	Categoría senior, Categorías inferiores	Entre 4 y 5 partidos/semana	1ª Autonómica	Sí	No	Para mantener o desarrollar la resistencia aeróbica (natación, ciclismo, carrera, saltar a la comba, etc.), Para mantener o desarrollar la fuerza muscular (diferentes técnicas de fortalecimiento muscular con máquinas, con peso libre, con el propio peso corporal, con gomas elásticas, etc.)	Más de 60 minutos	4-5 días	No		No			Nunca me había parado a pensar en que fuera necesario. Siempre he interpretado el descanso como un momento de descanso.	Durante el calentamiento inicial
2021-09-12 14:11:29	Sí	1999-06-11	Hombre	192	83	Mostoles (Madrid)	Regional/Autonómica	Local (sin experincia), Autonómica (6 años), Nacional (campeonato de españa minibasket), internacional (sin experiencia)	2019-2020	Categoría senior	Entre 2 y 3 partidos/semana	Nacional e inferiores	Sí	No	Para mantener o desarrollar la resistencia aeróbica (natación, ciclismo, carrera, saltar a la comba, etc.), Para mantener o desarrollar la flexibilidad (ya sea con el propio cuerpo, ayuda de otra persona, o con elementos como toallas, gomas elásticas, foam roller, etc.), Para mantener o desarrollar otras capacidades (coordinación, equilibrio, agilidad)	Entre 45 y 60 minutos	4-5 días	Sí	3-5 minutos	No			No considero que se me enfrie tanto el cuerpo como para necesitarlo	Durante el calentamiento inicial, Al finalizar el partido
2021-09-12 14:19:18	Sí	1980-06-08	Hombre	1.80	83	Madrid	Nacional	10 Nacional	2019-2020	Categoría senior	Entre 4 y 5 partidos/semana	Nacional	Sí	No	Para mantener o desarrollar la resistencia aeróbica (natación, ciclismo, carrera, saltar a la comba, etc.), Para mantener o desarrollar la fuerza muscular (diferentes técnicas de fortalecimiento muscular con máquinas, con peso libre, con el propio peso corporal, con gomas elásticas, etc.)	Entre 45 y 60 minutos	6-7 días	Sí	15	Sí	Estiramientos y movilidad articular		Calcificaciones en los talones	Durante el descanso entre mitades
2021-09-12 14:54:38	Sí	1995-03-01	Hombre	184	90	Madrid	Nacional	8	2019-2020	Categoría senior, Categorías inferiores	Entre 5 y 6 partidos semana	Primera Nacional FBM	Sí	No	Para mantener o desarrollar la resistencia aeróbica (natación, ciclismo, carrera, saltar a la comba, etc.), Para mantener o desarrollar la fuerza muscular (diferentes técnicas de fortalecimiento muscular con máquinas, con peso libre, con el propio peso corporal, con gomas elásticas, etc.), Para mantener o desarrollar la flexibilidad (ya sea con el propio cuerpo, ayuda de otra persona, o con eleme…	Entre 45 y 60 minutos	4-5 días	No		No				Durante el calentamiento inicial, Durante el descanso entre mitades
2021-09-12 15:26:11	Sí	1992-07-07	Hombre	181	75	Madrid	Regional/Autonómica	8 años	2019-2020	Categoría senior, Categorías inferiores	Entre 5 y 6 partidos semana	1a Nacional FBM	Sí	No	Para mantener o desarrollar la fuerza muscular (diferentes técnicas de fortalecimiento muscular con máquinas, con peso libre, con el propio peso corporal, con gomas elásticas, etc.), Para mantener o desarrollar la velocidad (capacidad de realizar sprints en el menor tiempo posible y de repetirlos el mayor número de veces)	Más de 60 minutos	4-5 días	Sí	5-10 minutos	No			No me he planteado si lo necesito	Durante el calentamiento inicial
2021-09-12 15:35:07	Sí	1994-03-09	Hombre	177	64.6	Madrid	Local, Regional/Autonómica	Desde el inicio en escuela hasta primera nacional 12 años (primera nacional 7)	2020-2021	Categoría senior	Entre 5 y 6 partidos semana	Primera nacional hasta minibasket	Sí	No	Para mantener o desarrollar la resistencia aeróbica (natación, ciclismo, carrera, saltar a la comba, etc.), Para mantener o desarrollar la fuerza muscular (diferentes técnicas de fortalecimiento muscular con máquinas, con peso libre, con el propio peso corporal, con gomas elásticas, etc.), Para mantener o desarrollar la velocidad (capacidad de realizar sprints en el menor tiempo posible y de repe…	Más de 60 minutos	4-5 días	No		No			Falta de hábito o no haberlo hecho nunca (ni probado)	Al finalizar el partido
2021-09-12 15:39:12	Sí	1992-05-01	Hombre	177	80	Madrid	Regional/Autonómica	8	2019-2020	Categoría senior	Entre 3 y 4 partidos/semana	Primera Nacional	Sí	No	Para mantener o desarrollar la resistencia aeróbica (natación, ciclismo, carrera, saltar a la comba, etc.), Para mantener o desarrollar la fuerza muscular (diferentes técnicas de fortalecimiento muscular con máquinas, con peso libre, con el propio peso corporal, con gomas elásticas, etc.)	Más de 60 minutos	6-7 días	No		No				Nunca	Nunca he sentido que los necesite o que mi recuperación mejore tras realizarlos, por lo que finalmente decidí eliminarlos de mi rutina.
2021-09-12 16:27:23	Sí	1973-05-04	Hombre	183	95	Madrid	Regional/Autonómica, Nacional	32/25	2019-2020	Categoría senior, Categorías inferiores	Entre 6 y 7 partidos semana	1ª DIV NAC y División de Honor Baloncesto en Silla de Ruedas	Sí	No	Para mantener o desarrollar la resistencia aeróbica (natación, ciclismo, carrera, saltar a la comba, etc.)	Entre 45 y 60 minutos	2-3 días	Sí	7-8 minutos	No			No me da mucho tiempo, entre revisar el acta, asearse, comentar como va el partido.....	Al finalizar el partido
2021-09-12 16:34:54	Sí	1989-05-17	Hombre	179	81	Madrid	Regional/Autonómica, Nacional	17 años	2020-2021	Categoría senior, Categorías inferiores	Entre 3 y 4 partidos/semana	Grupo 2, Nacional	Sí	No	Para mantener o desarrollar la fuerza muscular (diferentes técnicas de fortalecimiento muscular con máquinas, con peso libre, con el propio peso corporal, con gomas elásticas, etc.)	Más de 60 minutos	2-3 días	Sí	10 minutos	No			Prefiero descansar y charlar con el compañero	Durante el calentamiento inicial
2021-09-12 16:49:31	Sí	1994-03-03	Hombre	183	79	MADRID, MADRID	Local, Regional/Autonómica, Nacional	Local 10 años, regional 10 años, nacional 1 año, internacional sin experiencia	2018-2019	Categoría senior	Entre 5 y 6 partidos semana	Nacional y categorías autonomicas	Sí	Sí	Para mantener o desarrollar la fuerza muscular (diferentes técnicas de fortalecimiento muscular con máquinas, con peso libre, con el propio peso corporal, con gomas elásticas, etc.), Para mantener o desarrollar la flexibilidad (ya sea con el propio cuerpo, ayuda de otra persona, o con elementos como toallas, gomas elásticas, foam roller, etc.)	Más de 60 minutos	4-5 días	Sí	Entre 5-10 minutos	No			No me es necesario habitualmente	Durante el calentamiento inicial
2021-09-12 17:33:52	Sí	1993-04-27	Mujer	179	70	Madrid	Nacional	10 años regional 1 nacional	2020-2021	Categoría senior, Categorías inferiores	Entre 6 y 7 partidos semana	Nacional. Campeonatos de España	Sí	No	Para mantener o desarrollar la resistencia aeróbica (natación, ciclismo, carrera, saltar a la comba, etc.), Para mantener o desarrollar la fuerza muscular (diferentes técnicas de fortalecimiento muscular con máquinas, con peso libre, con el propio peso corporal, con gomas elásticas, etc.), Para mantener o desarrollar la velocidad (capacidad de realizar sprints en el menor tiempo posible y de repe…	Entre 45 y 60 minutos	4-5 días	Sí	3-5 min	Sí	Técnicas de manejo de la respiración (activación/relajación, conciencia)	Estiramientos		Durante el calentamiento inicial, Durante el descanso entre mitades
2021-09-12 18:04:40	Sí	1999-09-17	Mujer	174	58	Alcorcón, Madrid	Local, Regional/Autonómica, Nacional	Local (2), regional (2), nacional (2)	2019-2020	Categoría senior	Entre 4 y 5 partidos/semana	Nacional y cantera	Sí	No	Para mantener o desarrollar la resistencia aeróbica (natación, ciclismo, carrera, saltar a la comba, etc.)	Entre 30 y 45 minutos	2-3 días	Sí	5-10 minutos	No			Mi impresión es que prácticamente no tengo tiempo para ello	Durante el calentamiento inicial, Durante el descanso entre mitades
2021-09-12 18:29:06	Sí	1997-04-09	Mujer	165	57	Madrid	Local, Regional/Autonómica	6 años en general	2020-2021	Categoría senior	Entre 4 y 5 partidos/semana	Madrid	Sí	No	Para mantener o desarrollar la resistencia aeróbica (natación, ciclismo, carrera, saltar a la comba, etc.), Para mantener o desarrollar la fuerza muscular (diferentes técnicas de fortalecimiento muscular con máquinas, con peso libre, con el propio peso corporal, con gomas elásticas, etc.)	Más de 60 minutos	4-5 días	Sí	De 5 a 10 minutos, según el estiramiento posterior	Sí	Estiramientos y movilidad articular			Durante el calentamiento inicial, Durante el descanso entre mitades, Al finalizar el partido
2021-09-12 19:21:57	Sí	1991-09-26	Mujer	163	47.1	Madrid	Regional/Autonómica	5	2020-2021	Categoría senior, Categorías inferiores	Entre 5 y 6 partidos semana	1ª autonómica de Madrid	Sí	No	Para mantener o desarrollar la resistencia aeróbica (natación, ciclismo, carrera, saltar a la comba, etc.), Para mantener o desarrollar la fuerza muscular (diferentes técnicas de fortalecimiento muscular con máquinas, con peso libre, con el propio peso corporal, con gomas elásticas, etc.)	Más de 60 minutos	2-3 días	Sí	10 minutos	No			Nunca había pensado realizar algún tipo de actividad en esta parte del partido.	Durante el calentamiento inicial, Durante el descanso entre mitades
2021-09-12 19:34:20	Sí	1980-07-03	Hombre	174	72	Madrid	Local, Regional/Autonómica	local (25 años), regional/autonómica (25 años), nacional (sin experiencia), internacional (sin experiencia)	2018-2019	Categoría senior, Categorías inferiores	Entre 5 y 6 partidos semana	1a Nacional, senior,sub22, junior, cadete, infantil	Sí	No	Para mantener o desarrollar la resistencia aeróbica (natación, ciclismo, carrera, saltar a la comba, etc.)	Entre 45 y 60 minutos	2-3 días	Sí	5-10 minutos	No			Falta de tiempo y espacio	Durante el calentamiento inicial, Durante el descanso entre mitades, Al finalizar el partido
2021-09-12 20:55:42	Sí	1992-09-21	Hombre	183	80	Alcorcón, Madrid	Regional/Autonómica	3 años	2018-2019	Categoría senior	Entre 5 y 6 partidos semana	1a Nacional	No	No	Para mantener o desarrollar la resistencia aeróbica (natación, ciclismo, carrera, saltar a la comba, etc.)	Menos de 15 minutos	2-3 días	Sí	15 minutos	No			No lo necesito	Durante el calentamiento inicial
2021-09-12 21:56:56	Sí	1984-10-02	Hombre	167	59	Tafalla,Navarra	Regional/Autonómica	1 año	2020-2021	Categorías inferiores	Entre 3 y 4 partidos/semana	Cadete, Infantil	Sí	No	Para mantener o desarrollar la resistencia aeróbica (natación, ciclismo, carrera, saltar a la comba, etc.), Para mantener o desarrollar la fuerza muscular (diferentes técnicas de fortalecimiento muscular con máquinas, con peso libre, con el propio peso corporal, con gomas elásticas, etc.), Para mantener o desarrollar la flexibilidad (ya sea con el propio cuerpo, ayuda de otra persona, o con eleme…	Más de 60 minutos	4-5 días	Sí	5-10 minutos	Sí	Estiramientos y movilidad articular	Activación		Durante el calentamiento inicial, En el descanso entre primer y segundo cuarto
2021-09-13 09:19:47	Sí	1990-06-25	Hombre	188	89	Madrid	Local, Regional/Autonómica, Nacional	Local 2 años, autonómica 10 años, nacional 3 años	2020-2021	Categoría senior	Entre 3 y 4 partidos/semana	Nacional, Autonómica	Sí	No	Para mantener o desarrollar la resistencia aeróbica (natación, ciclismo, carrera, saltar a la comba, etc.), Para mantener o desarrollar la fuerza muscular (diferentes técnicas de fortalecimiento muscular con máquinas, con peso libre, con el propio peso corporal, con gomas elásticas, etc.), Para mantener o desarrollar la flexibilidad (ya sea con el propio cuerpo, ayuda de otra persona, o con eleme…	Entre 45 y 60 minutos	6-7 días	Sí	5-10 min	Sí	Estiramientos y movilidad articular	No perder la concentración e intensidad física		Durante el calentamiento inicial, Durante el descanso entre mitades, Al finalizar el partido
2021-09-13 10:05:45	Sí	1985-12-09	Hombre	178	80	Velilla de San Antonio, Madrid	Regional/Autonómica, Nacional	Regional (13) Nacional (9)	2020-2021	Categoría senior, Categorías inferiores	Entre 1 y 2 partidos/semana	Nacional	Sí	No	Para mantener o desarrollar la resistencia aeróbica (natación, ciclismo, carrera, saltar a la comba, etc.), Para mantener o desarrollar la velocidad (capacidad de realizar sprints en el menor tiempo posible y de repetirlos el mayor número de veces), Para mantener o desarrollar otras capacidades (coordinación, equilibrio, agilidad)	Entre 45 y 60 minutos	4-5 días	Sí	10 minutos	Sí	Estiramientos y movilidad articular, Técnicas de manejo de la respiración (activación/relajación, conciencia)	Evitar Lesiones		Durante el calentamiento inicial, Durante el descanso entre mitades, Al finalizar el partido
2021-09-13 10:18:26	Sí	1991-11-04	Mujer	170	63	Madrid	Regional/Autonómica	4 años (autonómica)	2019-2020	Categoría senior, Categorías inferiores	7 o más partidos/semana	Autonómicos	Sí	No	Para mantener o desarrollar la resistencia aeróbica (natación, ciclismo, carrera, saltar a la comba, etc.), Para mantener o desarrollar la fuerza muscular (diferentes técnicas de fortalecimiento muscular con máquinas, con peso libre, con el propio peso corporal, con gomas elásticas, etc.)	Entre 45 y 60 minutos	4-5 días	Sí	Estiramientos y movilidad articular	Sí	Estiramientos y movilidad articular	Mantener el rendimiento e incluso la concentración		Durante el calentamiento inicial, En el descanso entre primer y segundo cuarto
2021-09-13 13:17:23	Sí	1999-07-01	Hombre	190	85	Madrid	Regional/Autonómica	6 años arbitrando en madrid, de manera regional	2019-2020	Categoría senior	7 o más partidos/semana	FBM Primera Autonomica	Sí	No	Para mantener o desarrollar la resistencia aeróbica (natación, ciclismo, carrera, saltar a la comba, etc.), Para mantener o desarrollar la fuerza muscular (diferentes técnicas de fortalecimiento muscular con máquinas, con peso libre, con el propio peso corporal, con gomas elásticas, etc.), Para mantener o desarrollar la velocidad (capacidad de realizar sprints en el menor tiempo posible y de repe…	Más de 60 minutos	6-7 días	Sí	5 minutos	No	Trotar o correr, Estiramientos y movilidad articular, Técnicas de manejo de la respiración (activación/relajación, conciencia)		Sobrecarga de partidos que hace que no puedas desconectar durante el descanso, por tanto no has de volver a conectar	Durante el calentamiento inicial, Al finalizar el partido		Good luck in the project!
2021-09-13 17:46:04	Sí	1993-07-10	Hombre	177	71	MADRID	Regional/Autonómica	13 años.	2018-2019	Categoría senior	7 o más partidos/semana	1ª Autonómica Federación Madrileña	Sí	No	Para mantener o desarrollar la resistencia aeróbica (natación, ciclismo, carrera, saltar a la comba, etc.), Para mantener o desarrollar la fuerza muscular (diferentes técnicas de fortalecimiento muscular con máquinas, con peso libre, con el propio peso corporal, con gomas elásticas, etc.)	Más de 60 minutos	4-5 días	Sí	5-10 minutos.	No			El descanso consta de 10 minutos, y lo aprovechamos para hablar del partido, beber y revisar el actar.	Durante el calentamiento inicial, Al finalizar el partido
2021-09-13 20:12:51	Sí	1985-07-19	Hombre	179	74	Huelva, Huelva	Regional/Autonómica	Local (2 años), Regional/Autonómica (10 años)	2019-2020	Categoría senior, Categorías inferiores	Entre 1 y 2 partidos/semana	Provincial, Autonómica	Sí	No	Para mantener o desarrollar la resistencia aeróbica (natación, ciclismo, carrera, saltar a la comba, etc.)	Entre 30 y 45 minutos	2-3 días	Sí	10-15 minutos	No			No hay motivo específico, quizás no encuentro el momento entre ir a vestuario, revisar acta, etc	Durante el calentamiento inicial, Al finalizar el partido
2021-09-13 22:13:26	Sí	1997-01-18	Hombre	1'97	91	Murcia	Regional/Autonómica	Local y autonómica (3 años)	2020-2021	Categoría senior, Categorías inferiores	Entre 2 y 3 partidos/semana	Autonómica, junior, cadete...	No	No	Para mantener o desarrollar la resistencia aeróbica (natación, ciclismo, carrera, saltar a la comba, etc.)	Entre 15 y 30 minutos	2-3 días	Sí	3-5 minutos	No			Solemos emplear el descanso en hablar con los compañeros	Durante el calentamiento inicial
2021-09-13 22:13:28	Sí	1994-12-05	Hombre	185	75	Murcia	Local, Regional/Autonómica	Local 5 regional 3	2018-2019	Categoría senior	Entre 3 y 4 partidos/semana	G1	Sí	No	Para mantener o desarrollar la resistencia aeróbica (natación, ciclismo, carrera, saltar a la comba, etc.), Para mantener o desarrollar la fuerza muscular (diferentes técnicas de fortalecimiento muscular con máquinas, con peso libre, con el propio peso corporal, con gomas elásticas, etc.)	Entre 45 y 60 minutos	4-5 días	Sí	5/7 minutos	No			Sigo mas o menos caliente y los compañeros hablamos detalles del partido	Durante el calentamiento inicial
2021-09-13 22:14:31	Sí	1999-09-07	Hombre	200	96.5	El Palmar, Murcia	Regional/Autonómica	Local (2 años)	2019-2020	Categorías inferiores	Entre 2 y 3 partidos/semana	Cadete, Infantil, Alevín	Sí	No	Para mantener o desarrollar la fuerza muscular (diferentes técnicas de fortalecimiento muscular con máquinas, con peso libre, con el propio peso corporal, con gomas elásticas, etc.)	Más de 60 minutos	4-5 días	Sí	5-10 minutos	No			No me suele dar mucho tiempo	Durante el calentamiento inicial
2021-09-13 22:18:17	Sí	1987-09-13	Hombre	180	72	Murcia	Regional/Autonómica	Regional (15 años)	2019-2020	Categoría senior, Categorías inferiores	Entre 3 y 4 partidos/semana	Primera división	Sí	No	Para mantener o desarrollar la resistencia aeróbica (natación, ciclismo, carrera, saltar a la comba, etc.)	Entre 45 y 60 minutos	2-3 días	Sí	5-10 min	No	Trotar o correr, Ejercicio de fuerza (saltos, flexiones, etc.), Estiramientos y movilidad articular		Falta de tiempo	Durante el calentamiento inicial
2021-09-13 22:19:14	Sí	1978-10-31	Hombre	183	80	Cartagena ( Murcia )	Regional/Autonómica	8 años	2018-2019	Categoría senior, Categorías inferiores	Entre 2 y 3 partidos/semana	Grupo 2	Sí	No	Para mantener o desarrollar la resistencia aeróbica (natación, ciclismo, carrera, saltar a la comba, etc.), Para mantener o desarrollar la fuerza muscular (diferentes técnicas de fortalecimiento muscular con máquinas, con peso libre, con el propio peso corporal, con gomas elásticas, etc.)	Entre 30 y 45 minutos	4-5 días	Sí	5 minutos	No			Suelo dedicar el descanso para repasar el acta del partido..faltas pitadas a cada equipo..jugadores cargados de personales..etc	Durante el calentamiento inicial, Al finalizar el partido
2021-09-13 22:19:30	Sí	1998-01-30	Mujer	155	53	Murcia	Local	4	2020-2021	Categoría senior, Categorías inferiores	Entre 4 y 5 partidos/semana	2A autonómica	Sí	No	Para mantener o desarrollar la resistencia aeróbica (natación, ciclismo, carrera, saltar a la comba, etc.), Para mantener o desarrollar la flexibilidad (ya sea con el propio cuerpo, ayuda de otra persona, o con elementos como toallas, gomas elásticas, foam roller, etc.)	Más de 60 minutos	2-3 días	Sí	5	No			Dedicó ese tiempo para relajar los músculos	Durante el calentamiento inicial, Al finalizar el partido
2021-09-13 22:24:07	Sí	1975-04-16	Hombre	187	97	Bigastro alicante	Nacional	17	2018-2019	Categoría senior, Categorías inferiores	Entre 3 y 4 partidos/semana	Autonomica	Sí	No	Para mantener o desarrollar la fuerza muscular (diferentes técnicas de fortalecimiento muscular con máquinas, con peso libre, con el propio peso corporal, con gomas elásticas, etc.), Para mantener o desarrollar la velocidad (capacidad de realizar sprints en el menor tiempo posible y de repetirlos el mayor número de veces), Para mantener o desarrollar la flexibilidad (ya sea con el propio cuerpo, …	Entre 45 y 60 minutos	4-5 días	Sí	12	Sí	Estiramientos y movilidad articular, Ejercicios de coordinación y equilibrio	No entrar frío al partido		Durante el calentamiento inicial, Durante el descanso entre mitades, Al finalizar el partido
2021-09-13 22:25:20	Sí	2000-07-27	Mujer	161	54	Murcia	Regional/Autonómica	local (3 años), regional/autonómica (3 años).	2020-2021	Categoría senior	Entre 4 y 5 partidos/semana	1a Nacional masculina y 1a Nacional femenina	Sí	No	Para mantener o desarrollar la resistencia aeróbica (natación, ciclismo, carrera, saltar a la comba, etc.), Para mantener o desarrollar la fuerza muscular (diferentes técnicas de fortalecimiento muscular con máquinas, con peso libre, con el propio peso corporal, con gomas elásticas, etc.), Para mantener o desarrollar la velocidad (capacidad de realizar sprints en el menor tiempo posible y de repe…	Entre 45 y 60 minutos	2-3 días	Sí	5 minutos	No			No tengo la costumbre o necesidad.	Durante el calentamiento inicial, Al finalizar el partido
2021-09-13 22:26:11	Sí	1974-05-07	Hombre	1'74	68	Alcantarilla (Murcia)	Regional/Autonómica	11 años mas 25 de jugador y 15 de entrenador	2019-2020	Categoría senior, Categorías inferiores	Entre 4 y 5 partidos/semana	Nacional Femenino, nacional masculino, 1 y 2 autonómica	No	No	Para mantener o desarrollar la resistencia aeróbica (natación, ciclismo, carrera, saltar a la comba, etc.)	Entre 30 y 45 minutos	2-3 días	Sí	5-10 minutos	No			Me activo visualizando mentalmente la primera parte	Durante el calentamiento inicial		Thanks for the questionnaire, I will help you if there are more in the future
2021-09-13 22:52:59	Sí	1995-01-06	Hombre	184	80	Murcia	Regional/Autonómica	Regional/Autonómica 9	2019-2020	Categoría senior, Categorías inferiores	Entre 3 y 4 partidos/semana	1Division masculina	Sí	No	Para mantener o desarrollar la resistencia aeróbica (natación, ciclismo, carrera, saltar a la comba, etc.), Para mantener o desarrollar la fuerza muscular (diferentes técnicas de fortalecimiento muscular con máquinas, con peso libre, con el propio peso corporal, con gomas elásticas, etc.)	Más de 60 minutos	4-5 días	Sí	5	Sí	Estiramientos y movilidad articular	Para mantener caliente los músculos y prevenir lesiones. También activamos el cuerpo para continuar el partido.	Realizo unos estiramientos, no lo considero reactivación	Durante el calentamiento inicial, Durante el descanso entre mitades
2021-09-13 22:54:48	Sí	1989-06-08	Hombre	190	85	Murcia	Regional/Autonómica	Regional (3 años)	2018-2019	Categorías inferiores	Entre 4 y 5 partidos/semana	Grupo 2	Sí	No	Para mantener o desarrollar la resistencia aeróbica (natación, ciclismo, carrera, saltar a la comba, etc.), Para mantener o desarrollar la fuerza muscular (diferentes técnicas de fortalecimiento muscular con máquinas, con peso libre, con el propio peso corporal, con gomas elásticas, etc.), Para mantener o desarrollar la velocidad (capacidad de realizar sprints en el menor tiempo posible y de repe…	Entre 45 y 60 minutos	2-3 días	Sí	10-15 minutos	No			Aún no lo he necesitado	Durante el calentamiento inicial, Durante el descanso entre mitades
2021-09-13 23:01:01	Sí	1990-05-04	Hombre	1.70	71	La unión, Murcia	Regional/Autonómica	Regional (2 años)	2020-2021	Categorías inferiores	Entre 4 y 5 partidos/semana	Grupo 2	Sí	No	Para mantener o desarrollar la fuerza muscular (diferentes técnicas de fortalecimiento muscular con máquinas, con peso libre, con el propio peso corporal, con gomas elásticas, etc.), Para mantener o desarrollar la flexibilidad (ya sea con el propio cuerpo, ayuda de otra persona, o con elementos como toallas, gomas elásticas, foam roller, etc.)	Entre 30 y 45 minutos	2-3 días	Sí	3-5 minutos	No			Por estar comentando con mi compañero el transcurso del partido	Durante el calentamiento inicial, Al finalizar el partido
2021-09-13 23:34:24	Sí	1992-12-12	Hombre	190	100	Murcia	Regional/Autonómica	5 años	2018-2019	Categoría senior	Entre 4 y 5 partidos/semana	Autonómica	Sí	No	Para mantener o desarrollar la resistencia aeróbica (natación, ciclismo, carrera, saltar a la comba, etc.), Para mantener o desarrollar la fuerza muscular (diferentes técnicas de fortalecimiento muscular con máquinas, con peso libre, con el propio peso corporal, con gomas elásticas, etc.), Para mantener o desarrollar la velocidad (capacidad de realizar sprints en el menor tiempo posible y de repe…	Más de 60 minutos	4-5 días	Sí	Entre 10 y 15 minutos	Sí	Estiramientos y movilidad articular			Durante el calentamiento inicial, En el descanso entre primer y segundo cuarto, Durante el descanso entre mitades, En el descanso entre tercer y último cuarto, Al finalizar el partido		I have had hamstring problems, after working on it and increasing the range of flexibility, I had problems having vitiated movements, so I have to constantly work mobility and flexibility. When I exercise I don't notice it so much, but if I stop 3/4 days I return with some discomfort
2021-09-14 00:06:38	Sí	1995-10-30	Hombre	184	73	Murcia	Regional/Autonómica, Nacional	Autonómica 8 años Nacional 4 años	2018-2019	Categoría senior, Categorías inferiores	Entre 1 y 2 partidos/semana	FEB G3	Sí	Sí	Para mantener o desarrollar la resistencia aeróbica (natación, ciclismo, carrera, saltar a la comba, etc.), Para mantener o desarrollar la fuerza muscular (diferentes técnicas de fortalecimiento muscular con máquinas, con peso libre, con el propio peso corporal, con gomas elásticas, etc.), Para mantener o desarrollar la velocidad (capacidad de realizar sprints en el menor tiempo posible y de repe…	Entre 45 y 60 minutos	4-5 días	Sí	8-10 minutos	No				Al finalizar el partido
2021-09-14 00:47:38	Sí	1995-03-25	Hombre	188	97'5	Murcia	Local, Regional/Autonómica	Local (4 años), regional/autonómica (2 años)	2018-2019	Categoría senior, Categorías inferiores	Entre 4 y 5 partidos/semana	Grupo 2	Sí	No	Para mantener o desarrollar la fuerza muscular (diferentes técnicas de fortalecimiento muscular con máquinas, con peso libre, con el propio peso corporal, con gomas elásticas, etc.)	Más de 60 minutos	4-5 días	Sí	3-5 minutos	No			Considero que sigo activo físicamente.	Durante el calentamiento inicial, Al finalizar el partido
2021-09-14 07:00:41	Sí	2002-10-23	Hombre	187	82	Murcia	Regional/Autonómica	Autonómica(3 años)	2019-2020	Categorías inferiores	Entre 4 y 5 partidos/semana	Junior	Sí	No	Para mantener o desarrollar la resistencia aeróbica (natación, ciclismo, carrera, saltar a la comba, etc.), Para mantener o desarrollar la velocidad (capacidad de realizar sprints en el menor tiempo posible y de repetirlos el mayor número de veces), Para mantener o desarrollar otras capacidades (coordinación, equilibrio, agilidad)	Entre 30 y 45 minutos	4-5 días	Sí	4 minutos	No			Me desconcentra del partido	Durante el calentamiento inicial, En el descanso entre primer y segundo cuarto, Durante el descanso entre mitades, En el descanso entre tercer y último cuarto	Para ahorrar futuras molestias
2021-09-14 09:03:29	Sí	1972-02-26	Hombre	183	95	Murcia	Regional/Autonómica	3 local. 1 regional	2020-2021	Categoría senior, Categorías inferiores	Entre 1 y 2 partidos/semana	Autonomica, junior y cadete	Sí	No	Para mantener o desarrollar la resistencia aeróbica (natación, ciclismo, carrera, saltar a la comba, etc.), Para mantener o desarrollar la fuerza muscular (diferentes técnicas de fortalecimiento muscular con máquinas, con peso libre, con el propio peso corporal, con gomas elásticas, etc.), Para mantener o desarrollar la velocidad (capacidad de realizar sprints en el menor tiempo posible y de repe…	Más de 60 minutos	4-5 días	Sí	5	Sí	Estiramientos y movilidad articular, Técnicas de manejo de la respiración (activación/relajación, conciencia)	Centrarme de nuevo en el juego		Durante el calentamiento inicial, Durante el descanso entre mitades, Al finalizar el partido
2021-09-14 09:18:43	Sí	1999-01-10	Mujer	1.73	64	Murcia	Local, Regional/Autonómica	Local 5 años regional/autonómica 5 años	2020-2021	Categoría senior, Categorías inferiores	Entre 4 y 5 partidos/semana	Grupo 1 regional	Sí	Sí	Para mantener o desarrollar la resistencia aeróbica (natación, ciclismo, carrera, saltar a la comba, etc.), Para mantener o desarrollar la fuerza muscular (diferentes técnicas de fortalecimiento muscular con máquinas, con peso libre, con el propio peso corporal, con gomas elásticas, etc.)	Más de 60 minutos	2-3 días	Sí	10 minutos	No	Trotar o correr, Correr a máxima velocidad (esprintar), Estiramientos y movilidad articular, Ejercicios de coordinación y equilibrio		No lo he pensado nunca	Durante el calentamiento inicial
2021-09-14 09:34:37	Sí	1996-10-02	Hombre	178	67	Murcia	Regional/Autonómica	Regional/autonómica 5 años	2020-2021	Categoría senior, Categorías inferiores	Entre 3 y 4 partidos/semana	Desde infantil hasta 1a Autonómica Masculina	Sí	No	Para mantener o desarrollar la resistencia aeróbica (natación, ciclismo, carrera, saltar a la comba, etc.), Para mantener o desarrollar la fuerza muscular (diferentes técnicas de fortalecimiento muscular con máquinas, con peso libre, con el propio peso corporal, con gomas elásticas, etc.), Para mantener o desarrollar la velocidad (capacidad de realizar sprints en el menor tiempo posible y de repe…	Entre 45 y 60 minutos	4-5 días	Sí	5-10 minutos	Sí	Estiramientos y movilidad articular	No dejar que el cuerpo se enfríe costando así entrar en partido en la segunda parte.		Durante el calentamiento inicial, Durante el descanso entre mitades, En el descanso entre tercer y último cuarto
2021-09-14 10:00:11	Sí	1998-09-23	Hombre	185	80	Murcia	Regional/Autonómica	4 años	2019-2020	Categoría senior	Entre 4 y 5 partidos/semana	Grupo 2	Sí	No	Para mantener o desarrollar la resistencia aeróbica (natación, ciclismo, carrera, saltar a la comba, etc.), Para mantener o desarrollar la fuerza muscular (diferentes técnicas de fortalecimiento muscular con máquinas, con peso libre, con el propio peso corporal, con gomas elásticas, etc.)	Más de 60 minutos	6-7 días	Sí	3-5 minutos	No			Porque no he creado un hábito para realizar una reactivación después de un descanso entre mitades, normalmente dedicó ese tiempo para hablar con los compañeros diferentes cuestiones del partido, para ir al aseo y para comprobar el acta.	Al finalizar el partido
2021-09-14 11:08:26	Sí	1998-12-11	Hombre	190	72	Beniaján	Local, Regional/Autonómica	3 años	2020-2021	Categorías inferiores	Entre 1 y 2 partidos/semana	grupo2-3	Sí	No	Para mantener o desarrollar la resistencia aeróbica (natación, ciclismo, carrera, saltar a la comba, etc.), Para mantener o desarrollar la fuerza muscular (diferentes técnicas de fortalecimiento muscular con máquinas, con peso libre, con el propio peso corporal, con gomas elásticas, etc.)	Más de 60 minutos	4-5 días	No		No			Descanso	Durante el calentamiento inicial
2021-09-14 12:47:57	Sí	1995-05-03	Hombre	180	77	MADRID	Regional/Autonómica	8	2020-2021	Categoría senior, Categorías inferiores	Entre 6 y 7 partidos semana	NACIONAL MADRID	Sí	No	Para mantener o desarrollar la resistencia aeróbica (natación, ciclismo, carrera, saltar a la comba, etc.), Para mantener o desarrollar la fuerza muscular (diferentes técnicas de fortalecimiento muscular con máquinas, con peso libre, con el propio peso corporal, con gomas elásticas, etc.), Para mantener o desarrollar la velocidad (capacidad de realizar sprints en el menor tiempo posible y de repe…	Entre 45 y 60 minutos	4-5 días	No		No				Durante el calentamiento inicial, En el descanso entre primer y segundo cuarto, Durante el descanso entre mitades, En el descanso entre tercer y último cuarto
2021-09-14 12:54:38	Sí	2002-06-27	Mujer	174	64.5	Murcia	Local, Regional/Autonómica	Local 2 años. Regional 2 años	2018-2019	Categorías inferiores	Entre 2 y 3 partidos/semana	Desde mini hasta júnior	Sí	No				Sí	5-10 min	No			Ya estoy activada	Durante el calentamiento inicial
2021-09-14 13:00:45	Sí	1974-06-16	Hombre	184	93	Murcia	Local, Regional/Autonómica, Nacional	Local y regional (15 años), nacional (3 años)	2018-2019	Categoría senior	Entre 1 y 2 partidos/semana	Liga de veteranos	Sí	No	Para mantener o desarrollar la resistencia aeróbica (natación, ciclismo, carrera, saltar a la comba, etc.)	Entre 45 y 60 minutos	2-3 días	Sí	5 minutos aproximadamente	No			El descanso es corto (5')	Durante el calentamiento inicial	Prevenir lesiones
2021-09-14 13:11:16	Sí	1998-06-14	Hombre	178	71	Murcia, murcia	Regional/Autonómica	Regional/autonomica (5 años)	2019-2020	Categoría senior	Entre 3 y 4 partidos/semana	Nacional	Sí	No	Para mantener o desarrollar la fuerza muscular (diferentes técnicas de fortalecimiento muscular con máquinas, con peso libre, con el propio peso corporal, con gomas elásticas, etc.)	Más de 60 minutos	2-3 días	No		No			Lo dedico a comentar con el compañero el transcurso del partido	Al finalizar el partido
2021-09-14 22:08:32	Sí	1975-10-22	Hombre	188	128	El Puerto de Santa Maria Cadiz	Local	7 años local	2020-2021	Categorías inferiores	Entre 1 y 2 partidos/semana	Provincial	Sí	No				No		No			Falta de tiempo	Nunca	Olvido
2021-09-15 00:38:43	Sí	1985-05-04	Hombre	183	94	Rivas-Vaciamadrid, Madrid	Local, Nacional	local (13 años), nacional (8 años)	2018-2019	Categoría senior, Categorías inferiores	Entre 2 y 3 partidos/semana	FEB grupo 2, regional	Sí	No	Para mantener o desarrollar la resistencia aeróbica (natación, ciclismo, carrera, saltar a la comba, etc.)	Entre 45 y 60 minutos	2-3 días	Sí	6-12 minutos	Sí	Estiramientos y movilidad articular, Técnicas de manejo de la respiración (activación/relajación, conciencia)	Evitar volver a la pista en unas condiciones no aptas para valorar correctamente las acciones tras el descanso.		Durante el calentamiento inicial, Durante el descanso entre mitades, Al finalizar el partido
2021-09-15 12:39:35	Sí	1992-09-03	Hombre	183	81	Madrid	Nacional	autonomica (9), nacional (1)	2019-2020	Categoría senior	Entre 3 y 4 partidos/semana	Nacional Madrid	Sí	No	Para mantener o desarrollar la resistencia aeróbica (natación, ciclismo, carrera, saltar a la comba, etc.), Para mantener o desarrollar la fuerza muscular (diferentes técnicas de fortalecimiento muscular con máquinas, con peso libre, con el propio peso corporal, con gomas elásticas, etc.)	Más de 60 minutos	6-7 días	Sí	5-10 minutos	Sí	Ejercicio de fuerza (saltos, flexiones, etc.)	Para volver a preparar al cuerpo para la actividad		Durante el calentamiento inicial
2021-09-15 13:06:13	Sí	1996-03-04	Hombre	187	83.9	Toledo	Nacional	Local (1 año), autonómico (5 años) nacional (5 años)	2020-2021	Categoría senior	Entre 1 y 2 partidos/semana	Feb Grupo 1	Sí	Sí	Para mantener o desarrollar la resistencia aeróbica (natación, ciclismo, carrera, saltar a la comba, etc.), Para mantener o desarrollar la fuerza muscular (diferentes técnicas de fortalecimiento muscular con máquinas, con peso libre, con el propio peso corporal, con gomas elásticas, etc.), Para mantener o desarrollar la velocidad (capacidad de realizar sprints en el menor tiempo posible y de repe…	Entre 45 y 60 minutos	4-5 días	Sí	10-15 minutos	No				Durante el calentamiento inicial, Al finalizar el partido
2021-09-15 13:08:10	Sí	1974-08-08	Hombre	176	90	La Roda, Albacete	Regional/Autonómica	4años	2019-2020	Categorías inferiores	Entre 3 y 4 partidos/semana	Junior autonómico, escolares	Sí	No	Para mantener o desarrollar la resistencia aeróbica (natación, ciclismo, carrera, saltar a la comba, etc.), Para mantener o desarrollar la velocidad (capacidad de realizar sprints en el menor tiempo posible y de repetirlos el mayor número de veces), Para mantener o desarrollar otras capacidades (coordinación, equilibrio, agilidad)	Entre 45 y 60 minutos	2-3 días	Sí	15 minutos	Sí	Técnicas de manejo de la respiración (activación/relajación, conciencia)	Subir pulsaciones previo al comienzo		Al finalizar el partido
2021-09-15 13:09:16	Sí	1981-12-09	Hombre	186	100	MADRID	Local, Regional/Autonómica, Nacional	Nacional (7 años) Regional (15 años) Local (20 años)	2018-2019	Categoría senior, Categorías inferiores	Entre 2 y 3 partidos/semana	1ª Nacional (masculina y femenina) 1ª autonómica masculina, 2ª autonómica masculina, junior masculino y femenino, cadete e infantil y escolares.	Sí	No	Para mantener o desarrollar la resistencia aeróbica (natación, ciclismo, carrera, saltar a la comba, etc.), Para mantener o desarrollar la fuerza muscular (diferentes técnicas de fortalecimiento muscular con máquinas, con peso libre, con el propio peso corporal, con gomas elásticas, etc.)	Entre 30 y 45 minutos	2-3 días	Sí	Entre 5 y 10 minutos	No			Desconocimiento de rutina	Durante el calentamiento inicial, Durante el descanso entre mitades, Al finalizar el partido
2021-09-15 13:10:09	Sí	1980-05-08	Hombre	180	73	Guadalajara	Nacional	25 años (4 regional y 21 nacional)	2020-2021	Categoría senior	Entre 1 y 2 partidos/semana	Grupo 1	Sí	Sí	Para mantener o desarrollar la resistencia aeróbica (natación, ciclismo, carrera, saltar a la comba, etc.), Para mantener o desarrollar la fuerza muscular (diferentes técnicas de fortalecimiento muscular con máquinas, con peso libre, con el propio peso corporal, con gomas elásticas, etc.)	Entre 45 y 60 minutos	6-7 días	Sí	10-15 minutos	No			Prefiero dedicarlo a recuperar	Al finalizar el partido
2021-09-15 13:12:39	Sí	2000-08-03	Hombre	180	64	Toledo	Local, Regional/Autonómica	Local(1 año) , regional (2)	2019-2020	Categoría senior, Categorías inferiores	Entre 4 y 5 partidos/semana	Junior, Senior Zonal, Primera autonómica, Primera nacional femenina	Sí	No	Para mantener o desarrollar la resistencia aeróbica (natación, ciclismo, carrera, saltar a la comba, etc.), Para mantener o desarrollar la fuerza muscular (diferentes técnicas de fortalecimiento muscular con máquinas, con peso libre, con el propio peso corporal, con gomas elásticas, etc.)	Entre 45 y 60 minutos	4-5 días	Sí	5-7 minutos	Sí	Estiramientos y movilidad articular			Durante el descanso entre mitades, Al finalizar el partido
2021-09-15 13:13:36	Sí	1989-12-07	Hombre	1.76	85	Ciudad Real	Regional/Autonómica, Nacional	Nacional (5 años), regional/autonómica (15años)	2018-2019	Categoría senior, Categorías inferiores	Entre 4 y 5 partidos/semana	Primera nacional Castilla la Mancha	Sí	No	Para mantener o desarrollar la resistencia aeróbica (natación, ciclismo, carrera, saltar a la comba, etc.), Para mantener o desarrollar la fuerza muscular (diferentes técnicas de fortalecimiento muscular con máquinas, con peso libre, con el propio peso corporal, con gomas elásticas, etc.), Para mantener o desarrollar la velocidad (capacidad de realizar sprints en el menor tiempo posible y de repe…	Entre 45 y 60 minutos	4-5 días	Sí	5-10 minutos	Sí	Ejercicio de fuerza (saltos, flexiones, etc.), Estiramientos y movilidad articular	No perder la activación ni concentración del partido		Durante el descanso entre mitades
2021-09-15 13:20:04	Sí	1993-12-01	Hombre	1'92	89	Ciudad Real	Regional/Autonómica	Regional/autonómica (5 años)	2018-2019	Categoría senior	Entre 1 y 2 partidos/semana	1 autonómica fbclm	Sí	No	Para mantener o desarrollar la resistencia aeróbica (natación, ciclismo, carrera, saltar a la comba, etc.), Para mantener o desarrollar la fuerza muscular (diferentes técnicas de fortalecimiento muscular con máquinas, con peso libre, con el propio peso corporal, con gomas elásticas, etc.), Para mantener o desarrollar la velocidad (capacidad de realizar sprints en el menor tiempo posible y de repe…	Entre 45 y 60 minutos	4-5 días	Sí	10 minutos	Sí	Estiramientos y movilidad articular	Para no quedarme frío y tener las articulaciones activas para poder evitar lesiones.		Durante el calentamiento inicial, Durante el descanso entre mitades, Al finalizar el partido
2021-09-15 13:22:28	Sí	1998-12-03	Hombre	1.88	92KG	Tarancón	Regional/Autonómica	Local (6 años) regional (6años)	2020-2021	Categoría senior	Entre 2 y 3 partidos/semana	Infantiles cadete e infantil. Junior regional y zonal. Senior primera autonómica y Zonal.	Sí	Sí	Para mantener o desarrollar la fuerza muscular (diferentes técnicas de fortalecimiento muscular con máquinas, con peso libre, con el propio peso corporal, con gomas elásticas, etc.), Para mantener o desarrollar la velocidad (capacidad de realizar sprints en el menor tiempo posible y de repetirlos el mayor número de veces)	Más de 60 minutos	4-5 días	No		No			Nunca he visto necesario reactivarme físicamente, Si mentalmente pero es un pequeño ejercicio de un minuto.	Nunca	No he acabado fatigado después de un paritdo. Si por el día de varios partidos pero no por uno solo.
2021-09-15 13:23:47	Sí	1991-04-30	Mujer	169	64	Toledo	Regional/Autonómica	12	2020-2021	Categoría senior, Categorías inferiores	Entre 2 y 3 partidos/semana	1 Nacuonal masculina, 1 autónomica masculina, 1 Nacuonal femenina, JR fem, Jr masc, cadete masc, cadete fem, inf fem, inf masc, alev más, alev fem	Sí	No	Para mantener o desarrollar la resistencia aeróbica (natación, ciclismo, carrera, saltar a la comba, etc.), Para mantener o desarrollar la fuerza muscular (diferentes técnicas de fortalecimiento muscular con máquinas, con peso libre, con el propio peso corporal, con gomas elásticas, etc.)	Entre 45 y 60 minutos	4-5 días	Sí	5-10 minutos	No			Uso el tiempo para otras tareas: revisión acta, charla compañero...	Durante el calentamiento inicial
2021-09-15 13:26:08	Sí	1973-09-15	Hombre	166	68	Torrijos-Toledo	Local	Local	2018-2019	Categoría senior	Entre 3 y 4 partidos/semana	Senior Femenino, Autonómica, Zonal, Juniors, cadetes, infantiles y deporte base	Sí	No	Para mantener o desarrollar la velocidad (capacidad de realizar sprints en el menor tiempo posible y de repetirlos el mayor número de veces), Para mantener o desarrollar la flexibilidad (ya sea con el propio cuerpo, ayuda de otra persona, o con elementos como toallas, gomas elásticas, foam roller, etc.), Para mantener o desarrollar otras capacidades (coordinación, equilibrio, agilidad)	Entre 15 y 30 minutos	2-3 días	Sí	5-10 minutos	No			Ninguno	Durante el calentamiento inicial
2021-09-15 13:29:35	Sí	1978-07-25	Mujer	1.69	80	Ciudad Real	Local, Regional/Autonómica	Local 4 años, Regional 7 años	2019-2020	Categoría senior, Categorías inferiores	Entre 2 y 3 partidos/semana	Primera femenina, Primera Autonómica masculina, senior zonal, junior femenino y masculino, cadetes, infantiles, alevines	Sí	No	Para mantener o desarrollar la resistencia aeróbica (natación, ciclismo, carrera, saltar a la comba, etc.)	Entre 45 y 60 minutos	2-3 días	No		No			No hay tiempo, ese momento lo dedico para hablar con el equipo arbitral de aspectos del partido.	Nunca	Falta de hábito
2021-09-15 13:32:08	Sí	1996-01-31	Hombre	172	66	Ciudad Real	Local, Regional/Autonómica, Nacional	Local 5 años Autonomica 4 años Nacional 3 años	2020-2021	Categoría senior, Categorías inferiores	Entre 2 y 3 partidos/semana	Feb antiguo Grupo 2, actual Grupo3. En categorías autonomicas:, segunda autonomica, junior, cadetes, infantiles	Sí	No	Para mantener o desarrollar la resistencia aeróbica (natación, ciclismo, carrera, saltar a la comba, etc.), Para mantener o desarrollar la velocidad (capacidad de realizar sprints en el menor tiempo posible y de repetirlos el mayor número de veces), Para mantener o desarrollar otras capacidades (coordinación, equilibrio, agilidad)	Más de 60 minutos	4-5 días	Sí	10-15	No			No considero que necesite reactivarmw físicamente.	Durante el calentamiento inicial
2021-09-15 13:43:31	Sí	1972-12-02	Hombre	182	85	Toledo	Local, Regional/Autonómica, Nacional	28 años	2018-2019	Categoría senior	Entre 2 y 3 partidos/semana	(FEB grupo 3, AUTONÓMICO CLM 1ª NAC)	Sí	No	Para mantener o desarrollar la resistencia aeróbica (natación, ciclismo, carrera, saltar a la comba, etc.)	Más de 60 minutos	4-5 días	Sí	(10 minutos)	No				Durante el calentamiento inicial, Al finalizar el partido
2021-09-15 13:45:41	Sí	1998-07-05	Hombre	1.87	110kg	Hellín, Albacete	Local, Regional/Autonómica	Local (7) regional (4)	2020-2021	Categorías inferiores	Entre 2 y 3 partidos/semana	Grupo 3 FBCLM	Sí	No	Para mantener o desarrollar la resistencia aeróbica (natación, ciclismo, carrera, saltar a la comba, etc.), Para mantener o desarrollar la fuerza muscular (diferentes técnicas de fortalecimiento muscular con máquinas, con peso libre, con el propio peso corporal, con gomas elásticas, etc.)	Entre 45 y 60 minutos	4-5 días	Sí	Calentamiento 5 minutos	No			No tengo costumbre	Durante el calentamiento inicial
2021-09-15 13:49:38	Sí	1985-06-18	Hombre	1.75	78	ALCÁZAR DE SAN JUAN	Regional/Autonómica, Nacional	REGIONAL (18) NACIONAL (6)	2018-2019	Categoría senior, Categorías inferiores	Entre 3 y 4 partidos/semana	GRUPO 2 DESDE 2008 AL 2015	No	No	Para mantener o desarrollar la resistencia aeróbica (natación, ciclismo, carrera, saltar a la comba, etc.)	Entre 45 y 60 minutos	2-3 días	Sí	3 MINUTOS	No			PORQUE NO TENEMOS TIEMPO ENTRE EL DESCANSO	Durante el calentamiento inicial
2021-09-15 14:05:57	Sí	1999-12-03	Hombre	180	87	Murcia	Local	2 años	2019-2020	Categorías inferiores	Entre 1 y 2 partidos/semana	Grupo 3	Sí	No	Para mantener o desarrollar la resistencia aeróbica (natación, ciclismo, carrera, saltar a la comba, etc.), Para mantener o desarrollar la fuerza muscular (diferentes técnicas de fortalecimiento muscular con máquinas, con peso libre, con el propio peso corporal, con gomas elásticas, etc.), Para mantener o desarrollar la velocidad (capacidad de realizar sprints en el menor tiempo posible y de repe…	Más de 60 minutos	4-5 días	Sí	3 minutos	No			No lo creo necesario	Durante el calentamiento inicial
2021-09-15 14:15:01	Sí	1964-07-19	Hombre	1.74	90	Talavera de la reina	Regional/Autonómica	27 años	2020-2021	Categoría senior	Entre 3 y 4 partidos/semana	Zonal	Sí	No	Para mantener o desarrollar la resistencia aeróbica (natación, ciclismo, carrera, saltar a la comba, etc.)	Entre 45 y 60 minutos	6-7 días	Sí	5-10 minutos.	Sí	Estiramientos y movilidad articular	Estiramiento piernas y brazos.		Durante el calentamiento inicial		I am 57 years old and I like to be a basketball referee.
2021-09-15 14:50:04	Sí	1972-12-09	Hombre	1.73	83	tomelloso, ciudad real	Regional/Autonómica	regional/autonomica(8 años)	2020-2021	Categoría senior, Categorías inferiores	Entre 3 y 4 partidos/semana	cadetes, junior, infantil, senior	Sí	No	Para mantener o desarrollar la resistencia aeróbica (natación, ciclismo, carrera, saltar a la comba, etc.)	Entre 30 y 45 minutos	2-3 días	No		Sí	Estiramientos y movilidad articular	mejora en la respuesta fisica		Durante el calentamiento inicial, Durante el descanso entre mitades, Al finalizar el partido		thank you
2021-09-15 14:56:11	Sí	1968-12-20	Hombre	1.8	82	Ciudad Real (CIUDAD REAL)	Regional/Autonómica	36 AÑOS	2019-2020	Categoría senior, Categorías inferiores	Entre 2 y 3 partidos/semana	1ª NAC MAS Y FEM, CATEGORIAS SENIOR, JUNIOR Y EN EDAD ESCOLAR	Sí	No	Para mantener o desarrollar la resistencia aeróbica (natación, ciclismo, carrera, saltar a la comba, etc.)	Entre 45 y 60 minutos	2-3 días	Sí	15-20	No			CONSIDERO QUE HAY POCO TIEMPO Y LO EMPLEO PARA CONVERSAR CON LOS COMPAÑEROS/AS	Durante el calentamiento inicial
2021-09-15 15:15:09	Sí	1977-05-22	Hombre	1.71	88	Tarancon, Cuenca	Local, Regional/Autonómica	Local ( 26 años), Regional/autonómica ( 20 años) nacional ( sin experiencia) internacional ( sin experiencia)	2018-2019	Categoría senior, Categorías inferiores	Entre 3 y 4 partidos/semana	Competiciones Fbclm Nacional, Junior, Infaltil y Cadete, 2 Femenina, 1 Autonómica	Sí	No	Para mantener o desarrollar la resistencia aeróbica (natación, ciclismo, carrera, saltar a la comba, etc.)	Entre 15 y 30 minutos	2-3 días	Sí	5-10 minutos	No			No lo veo muy necesario	Durante el calentamiento inicial, Al finalizar el partido
2021-09-15 15:42:53	Sí	1994-07-30	Hombre	1.79	82	Madrigueras (Albacete)	Nacional	Local 11 años, regional 10 años, nacional 8 años, internacional sin experiencia	2018-2019	Categoría senior	Entre 2 y 3 partidos/semana	Grupo 2	Sí	No	Para mantener o desarrollar la resistencia aeróbica (natación, ciclismo, carrera, saltar a la comba, etc.), Para mantener o desarrollar la velocidad (capacidad de realizar sprints en el menor tiempo posible y de repetirlos el mayor número de veces)	Entre 45 y 60 minutos	2-3 días	Sí	10 minutos	No			El descanso lo dedico para analizar el partido y corregir cosas de este	Durante el calentamiento inicial, Al finalizar el partido
2021-09-15 16:05:41	Sí	1980-06-22	Hombre	183	85	Almagro (Ciudad Real)	Local, Regional/Autonómica, Nacional	Local(22años) regional(19años) nacional (19 años)	2018-2019	Categoría senior	Entre 2 y 3 partidos/semana	Nacional	Sí	No	Para mantener o desarrollar la resistencia aeróbica (natación, ciclismo, carrera, saltar a la comba, etc.), Para mantener o desarrollar la fuerza muscular (diferentes técnicas de fortalecimiento muscular con máquinas, con peso libre, con el propio peso corporal, con gomas elásticas, etc.)	Entre 45 y 60 minutos	2-3 días	Sí	15 minutos	No			No hay tiempo	Durante el calentamiento inicial
2021-09-15 19:06:17	Sí	1984-01-13	Hombre	177	70	Madrid	Regional/Autonómica	Autonómico 16 años	2020-2021	Categoría senior, Categorías inferiores	Entre 3 y 4 partidos/semana	1ª Nacional Madrid y resto de competiciones de la FBM (junior, cadete, infantil, senior, etc)	Sí	No	Para mantener o desarrollar la resistencia aeróbica (natación, ciclismo, carrera, saltar a la comba, etc.)	Entre 15 y 30 minutos	2-3 días	Sí	4-7 minutos.	No	Trotar o correr, Correr a máxima velocidad (esprintar), Estiramientos y movilidad articular			Durante el calentamiento inicial
2021-09-16 12:55:02	Sí	2000-02-12	Mujer	165	59	Zaragoza	Local	Local (3 años)	2019-2020	Categoría senior, Categorías inferiores	Entre 6 y 7 partidos semana	P3 y P2 en FAB	Sí	No	Para mantener o desarrollar la resistencia aeróbica (natación, ciclismo, carrera, saltar a la comba, etc.), Para mantener o desarrollar la fuerza muscular (diferentes técnicas de fortalecimiento muscular con máquinas, con peso libre, con el propio peso corporal, con gomas elásticas, etc.), Para mantener o desarrollar la velocidad (capacidad de realizar sprints en el menor tiempo posible y de repe…	Más de 60 minutos	4-5 días	No		No			Si me reactivo entre mitades luego estoy cansada y nerviosa, los descansos los utilizo para relajarme.	Durante el calentamiento inicial
2021-09-16 13:06:44	Sí	1995-01-22	Hombre	175	65	Zaragoza	Local, Regional/Autonómica	Local (5 años), regional/autonómica (5 años)	2020-2021	Categoría senior, Categorías inferiores	Entre 6 y 7 partidos semana	Autonómica	Sí	No	Para mantener o desarrollar la resistencia aeróbica (natación, ciclismo, carrera, saltar a la comba, etc.), Para mantener o desarrollar la fuerza muscular (diferentes técnicas de fortalecimiento muscular con máquinas, con peso libre, con el propio peso corporal, con gomas elásticas, etc.), Para mantener o desarrollar la velocidad (capacidad de realizar sprints en el menor tiempo posible y de repe…	Más de 60 minutos	4-5 días	No		No				Durante el calentamiento inicial
2021-09-16 13:10:10	Sí	2000-06-23	Hombre	181	69	Utebo, Zaragoza	Local, Regional/Autonómica	Local ( 4 años). Regional/Autonómico (2 años)	2019-2020	Categoría senior, Categorías inferiores	Entre 6 y 7 partidos semana	Escolares, 3a Aragonesa masculina y femenina, 2a aragonesa masculina y femenino, junior CTO. de Aragón	Sí	No	Para mantener o desarrollar la resistencia aeróbica (natación, ciclismo, carrera, saltar a la comba, etc.), Para mantener o desarrollar la fuerza muscular (diferentes técnicas de fortalecimiento muscular con máquinas, con peso libre, con el propio peso corporal, con gomas elásticas, etc.), Para mantener o desarrollar la velocidad (capacidad de realizar sprints en el menor tiempo posible y de repe…	Entre 15 y 30 minutos	2-3 días	Sí	Pequeños saltos antes de empezar (2 o 3) y estiramiento de cuádriceps y gemelos (10 segundos )	No			Me centro en hablar con el compañero sobre el partido	Durante el calentamiento inicial
2021-09-16 13:10:48	Sí	1996-05-24	Hombre	180	77	ZARAGOZA,ZARAGOZA	Local, Regional/Autonómica, Nacional	LOCAL (9 AÑOS), REGIONAL (5 AÑOS) NACIONAL (2 AÑOS)	2019-2020	Categoría senior	Entre 5 y 6 partidos semana	CATEGORIA 1 NACIONAL MASCULINA A1 ARAGÓN	Sí	No	Para mantener o desarrollar la resistencia aeróbica (natación, ciclismo, carrera, saltar a la comba, etc.), Para mantener o desarrollar la fuerza muscular (diferentes técnicas de fortalecimiento muscular con máquinas, con peso libre, con el propio peso corporal, con gomas elásticas, etc.)	Más de 60 minutos	4-5 días	Sí	10 - 15 MINUTOS	No			CONSIDERO QUE EN ESE MOMENTO DEL PARTIDO ESTOY LOS SUFICIENTEMENTE ACTIVADO FISICAMENTE.	Durante el calentamiento inicial, Al finalizar el partido
2021-09-16 13:16:31	Sí	1974-06-17	Hombre	168	70	Zaragoza	Local	2 años	2019-2020	Categorías inferiores	Entre 2 y 3 partidos/semana	Escolares	Sí	No	Para mantener o desarrollar la resistencia aeróbica (natación, ciclismo, carrera, saltar a la comba, etc.), Para mantener o desarrollar la fuerza muscular (diferentes técnicas de fortalecimiento muscular con máquinas, con peso libre, con el propio peso corporal, con gomas elásticas, etc.)	Entre 45 y 60 minutos	4-5 días	Sí	5 minutos	No	Trotar o correr, Correr a máxima velocidad (esprintar), Estiramientos y movilidad articular		El descanso es poco tiempo.	Durante el calentamiento inicial
2021-09-16 13:57:13	Sí	2002-03-01	Hombre	174	77	Zaragoza	Local, Regional/Autonómica	Local (2 años), regional (2 años)	2019-2020	Categorías inferiores	Entre 4 y 5 partidos/semana	FAB P3	Sí	No	Para mantener o desarrollar la resistencia aeróbica (natación, ciclismo, carrera, saltar a la comba, etc.), Para mantener o desarrollar la flexibilidad (ya sea con el propio cuerpo, ayuda de otra persona, o con elementos como toallas, gomas elásticas, foam roller, etc.), Para mantener o desarrollar otras capacidades (coordinación, equilibrio, agilidad)	Entre 30 y 45 minutos	2-3 días	No		No				Durante el calentamiento inicial, Durante el descanso entre mitades, Al finalizar el partido
2021-09-16 15:06:40	Sí	1997-04-11	Hombre	180	80	Zaragoza	Regional/Autonómica	Local (7 años) Regional/Autonómica (5 años)	2018-2019	Categoría senior, Categorías inferiores	7 o más partidos/semana	Autonómica 2 de la Federacion Aragonesa de Baloncesto	Sí	No	Para mantener o desarrollar la resistencia aeróbica (natación, ciclismo, carrera, saltar a la comba, etc.), Para mantener o desarrollar la velocidad (capacidad de realizar sprints en el menor tiempo posible y de repetirlos el mayor número de veces)	Entre 45 y 60 minutos	4-5 días	No		No			Ninguno, debería hacerlo.	Al finalizar el partido
2021-09-16 15:12:12	Sí	1979-04-11	Hombre	179	78	Alcázar de San Juan	Regional/Autonómica	3 años	2019-2020	Categoría senior, Categorías inferiores	Entre 6 y 7 partidos semana	Grupo 4	Sí	No	Para mantener o desarrollar la resistencia aeróbica (natación, ciclismo, carrera, saltar a la comba, etc.), Para mantener o desarrollar la fuerza muscular (diferentes técnicas de fortalecimiento muscular con máquinas, con peso libre, con el propio peso corporal, con gomas elásticas, etc.)	Más de 60 minutos	4-5 días	Sí	10'	No	Trotar o correr, Estiramientos y movilidad articular		Descansar y pensar	Durante el calentamiento inicial, Al finalizar el partido
2021-09-16 15:27:59	Sí	1990-12-24	Hombre	177	77	Zaragoza	Local, Regional/Autonómica, Nacional	Local (1) regional/autonómica (5) nacional (5)	2019-2020	Categoría senior, Categorías inferiores	Entre 4 y 5 partidos/semana	Nacional	Sí	No	Para mantener o desarrollar la resistencia aeróbica (natación, ciclismo, carrera, saltar a la comba, etc.), Para mantener o desarrollar la fuerza muscular (diferentes técnicas de fortalecimiento muscular con máquinas, con peso libre, con el propio peso corporal, con gomas elásticas, etc.)	Entre 45 y 60 minutos	4-5 días	No		No			Entiendo que no lo necesito.	Durante el calentamiento inicial
2021-09-16 15:55:32	Sí	1996-03-13	Hombre	185	88	zaragoza	Regional/Autonómica	regional/autonómica(9 años)	2019-2020	Categoría senior, Categorías inferiores	Entre 6 y 7 partidos semana	grupo 1, grupo 2....	Sí	No	Para mantener o desarrollar la fuerza muscular (diferentes técnicas de fortalecimiento muscular con máquinas, con peso libre, con el propio peso corporal, con gomas elásticas, etc.), Para mantener o desarrollar la velocidad (capacidad de realizar sprints en el menor tiempo posible y de repetirlos el mayor número de veces)	Entre 45 y 60 minutos	4-5 días	Sí	5-8	No				Durante el calentamiento inicial, Al finalizar el partido
2021-09-16 17:03:03	Sí	1989-12-29	Hombre	185	90	Zaragoza	Local, Regional/Autonómica, Internacional	Local y regional 12 años. Internacional 1 torneo	2018-2019	Categoría senior, Categorías inferiores	Entre 5 y 6 partidos semana	Nacional	Sí	No	Para mantener o desarrollar la resistencia aeróbica (natación, ciclismo, carrera, saltar a la comba, etc.), Para mantener o desarrollar la fuerza muscular (diferentes técnicas de fortalecimiento muscular con máquinas, con peso libre, con el propio peso corporal, con gomas elásticas, etc.), Para mantener o desarrollar la velocidad (capacidad de realizar sprints en el menor tiempo posible y de repe…	Entre 30 y 45 minutos	2-3 días	Sí	5-10 minutos	No			Estar dialogando con los compañeros sobre el partido	Durante el calentamiento inicial, Al finalizar el partido
2021-09-16 17:08:10	Sí	2004-10-22	Hombre	184	101	Zaragoza Capital	Local	1 año	2020-2021	Categorías inferiores	Entre 3 y 4 partidos/semana	Alevines y Benjamines	Sí	No	Para mantener o desarrollar la resistencia aeróbica (natación, ciclismo, carrera, saltar a la comba, etc.), Para mantener o desarrollar la fuerza muscular (diferentes técnicas de fortalecimiento muscular con máquinas, con peso libre, con el propio peso corporal, con gomas elásticas, etc.)	Más de 60 minutos	4-5 días	No		Sí	Estiramientos y movilidad articular	Para no quedarme frio y así poder comenzar la segunda parte sin problemas.		Durante el calentamiento inicial, Durante el descanso entre mitades
2021-09-16 18:26:23	Sí	1981-01-13	Hombre	171	70	Ciudad Real	Local, Regional/Autonómica	Local (24 años) Regional (11 años)	2018-2019	Categoría senior, Categorías inferiores	Entre 4 y 5 partidos/semana	1' Autonómica Castilla La Mancha. Zonal Castilla la Mancha. Junior Castilla la Mancha. Local Ciudad Real	Sí	No	Para mantener o desarrollar la resistencia aeróbica (natación, ciclismo, carrera, saltar a la comba, etc.)	Entre 45 y 60 minutos	4-5 días	Sí	5-10 minutos	No			Descanso repasando partido con el compañero	Durante el calentamiento inicial, Al finalizar el partido
2021-09-16 20:47:09	Sí	1988-04-03	Hombre	1'89	82	Badaín	Regional/Autonómica	8	2020-2021	Categoría senior	7 o más partidos/semana	Automico	Sí	No	Para mantener o desarrollar la resistencia aeróbica (natación, ciclismo, carrera, saltar a la comba, etc.)	Entre 45 y 60 minutos	4-5 días	No		No				Nunca
2021-09-17 00:12:10	Sí	1976-12-14	Hombre	1.74	78	Ciudad Real	Regional/Autonómica, Nacional	Autonómica (12 años) Nacional (3 años)	2019-2020	Categoría senior	Entre 3 y 4 partidos/semana	Primera nacional fem y masc, junior, deportes escolar	Sí	No	Para mantener o desarrollar la resistencia aeróbica (natación, ciclismo, carrera, saltar a la comba, etc.), Para mantener o desarrollar la velocidad (capacidad de realizar sprints en el menor tiempo posible y de repetirlos el mayor número de veces), Para mantener o desarrollar la flexibilidad (ya sea con el propio cuerpo, ayuda de otra persona, o con elementos como toallas, gomas elásticas, foam …	Entre 30 y 45 minutos	2-3 días	Sí	15 minutos	No			Reactivo mentalmente con compañero para hablar del partido y su desarrollo	Durante el calentamiento inicial		All the best. Thank you.
2021-09-17 08:32:38	Sí	2002-02-01	Mujer	170	60	Zaragoza	Local	Local 2años	2019-2020	Categoría senior, Categorías inferiores	Entre 5 y 6 partidos semana	P1	Sí	No	Para mantener o desarrollar la resistencia aeróbica (natación, ciclismo, carrera, saltar a la comba, etc.), Para mantener o desarrollar la fuerza muscular (diferentes técnicas de fortalecimiento muscular con máquinas, con peso libre, con el propio peso corporal, con gomas elásticas, etc.), Para mantener o desarrollar la velocidad (capacidad de realizar sprints en el menor tiempo posible y de repe…	Más de 60 minutos	4-5 días	No		Sí	Estiramientos y movilidad articular, Técnicas de manejo de la respiración (activación/relajación, conciencia)	Evitar lesiones		Durante el calentamiento inicial, Durante el descanso entre mitades, Al finalizar el partido
2021-09-17 12:24:24	Sí	2002-03-19	Mujer	168	63	Zaragoza	Local	Local (2 años)	2020-2021	Categoría senior, Categorías inferiores	Entre 5 y 6 partidos semana	.	Sí	No	Para mantener o desarrollar la resistencia aeróbica (natación, ciclismo, carrera, saltar a la comba, etc.), Para mantener o desarrollar la fuerza muscular (diferentes técnicas de fortalecimiento muscular con máquinas, con peso libre, con el propio peso corporal, con gomas elásticas, etc.), Para mantener o desarrollar la velocidad (capacidad de realizar sprints en el menor tiempo posible y de repe…	Más de 60 minutos	4-5 días	No		No				Al finalizar el partido
2021-09-17 12:35:40	Sí	2001-02-23	Hombre	183	70	Zaragoza, Zaragoza	Local, Regional/Autonómica	Local (5 años), Autonómica (3 años), Nacional e Internacional (sin experiencia)	2019-2020	Categoría senior, Categorías inferiores	Entre 5 y 6 partidos semana	CAAB Aragon. Grupo técnico A4.	Sí	No	Para mantener o desarrollar la resistencia aeróbica (natación, ciclismo, carrera, saltar a la comba, etc.), Para mantener o desarrollar la fuerza muscular (diferentes técnicas de fortalecimiento muscular con máquinas, con peso libre, con el propio peso corporal, con gomas elásticas, etc.)	Más de 60 minutos	2-3 días	No		No			Desconocimiento. Aprovechar el tiempo para hablar con el compañero sobre situaciones del juego.	Durante el calentamiento inicial, Al finalizar el partido
2021-09-17 13:31:20	Sí	2020-08-30	Hombre	175	69	Albacete	Local, Regional/Autonómica, Nacional	Local (30 años) nacional (20 años)	2019-2020	Categoría senior, Categorías inferiores	Entre 1 y 2 partidos/semana	Primera nacional, primera autonómica, junior, deporte base	Sí	Sí	Para mantener o desarrollar la resistencia aeróbica (natación, ciclismo, carrera, saltar a la comba, etc.), Para mantener o desarrollar la fuerza muscular (diferentes técnicas de fortalecimiento muscular con máquinas, con peso libre, con el propio peso corporal, con gomas elásticas, etc.), Para mantener o desarrollar la velocidad (capacidad de realizar sprints en el menor tiempo posible y de repe…	Más de 60 minutos	6-7 días	Sí	10 minutos	Sí	Estiramientos y movilidad articular, Ejercicios de coordinación y equilibrio	No perder la concentración en los primeros minutos del tercer cuarto por el transcurso del descanso		Durante el calentamiento inicial, Durante el descanso entre mitades
2021-09-17 15:22:30	Sí	2002-12-20	Mujer	169	65	Zaragoza	Local	Local 3 años	2018-2019	Categoría senior, Categorías inferiores	Entre 4 y 5 partidos/semana	Escolares , segunda aragonesa femenina, masculina, campeonato de Aragón junior primera y junior segunda	Sí	No	Para mantener o desarrollar la resistencia aeróbica (natación, ciclismo, carrera, saltar a la comba, etc.), Para mantener o desarrollar la fuerza muscular (diferentes técnicas de fortalecimiento muscular con máquinas, con peso libre, con el propio peso corporal, con gomas elásticas, etc.)	Entre 45 y 60 minutos	4-5 días	No	0	No			Sería algo positivo si lo hiciese, sin embargo es verdad que la mayoría de ese tiempo en partidos federados lo dedico en comentar con el compañero el partido y las cosas a mejorar o como continuar	Durante el calentamiento inicial
2021-09-17 16:21:16	Sí	2004-03-20	Mujer	164	55	Teruel	Local, Regional/Autonómica	local 5 años, autonomica 3 años, el resto sin experiencia	2019-2020	Categoría senior, Categorías inferiores	Entre 3 y 4 partidos/semana	Escolares, municipal turolense, CTO Aragón 3º masc, 2ºmascy 2ºfem	Sí	No	Para mantener o desarrollar la resistencia aeróbica (natación, ciclismo, carrera, saltar a la comba, etc.), Para mantener o desarrollar la velocidad (capacidad de realizar sprints en el menor tiempo posible y de repetirlos el mayor número de veces), Para mantener o desarrollar otras capacidades (coordinación, equilibrio, agilidad)	Entre 45 y 60 minutos	4-5 días	Sí	5-10 min	No			Porque me reactivo rápido, en las dos primeras jugadas del periodo.	Durante el calentamiento inicial
2021-09-17 19:09:32	Sí	1984-10-19	Hombre	175	92	Monzón, Huesca	Regional/Autonómica	20	2020-2021	Categoría senior	Entre 2 y 3 partidos/semana	autonomica como máximo	Sí	Sí	Para mantener o desarrollar la fuerza muscular (diferentes técnicas de fortalecimiento muscular con máquinas, con peso libre, con el propio peso corporal, con gomas elásticas, etc.)	Entre 45 y 60 minutos	4-5 días	No		No			Nunca me lo he propuesto ni me han explicado su necesidad	Durante el calentamiento inicial
2021-09-17 20:11:05	Sí	1998-03-10	Mujer	169	85	Zaragoza	Regional/Autonómica	7 años	2020-2021	Categoría senior	Entre 6 y 7 partidos semana	Autonomica	Sí					No		No				Nunca
2021-09-18 14:25:08	Sí	1996-10-17	Hombre	178	67	Torrox, Malga	Local, Regional/Autonómica, Nacional	Local (5años) autonómica (5 años) nacional (2años)	2019-2020	Categoría senior	Entre 6 y 7 partidos semana	Autonomica	Sí	No	Para mantener o desarrollar la resistencia aeróbica (natación, ciclismo, carrera, saltar a la comba, etc.), Para mantener o desarrollar la fuerza muscular (diferentes técnicas de fortalecimiento muscular con máquinas, con peso libre, con el propio peso corporal, con gomas elásticas, etc.), Para mantener o desarrollar la flexibilidad (ya sea con el propio cuerpo, ayuda de otra persona, o con eleme…	Entre 45 y 60 minutos	2-3 días	Sí	5-10 minutos	No			No considero que me desactive durante el descanso	Durante el calentamiento inicial, Al finalizar el partido
2021-09-18 14:25:41	Sí	1997-09-25	Hombre	205	99'1	Málaga	Nacional	Provincial 5 años	2019-2020	Categoría senior	Entre 4 y 5 partidos/semana	Provincial	Sí		Para mantener o desarrollar la fuerza muscular (diferentes técnicas de fortalecimiento muscular con máquinas, con peso libre, con el propio peso corporal, con gomas elásticas, etc.), Para mantener o desarrollar la velocidad (capacidad de realizar sprints en el menor tiempo posible y de repetirlos el mayor número de veces)	Más de 60 minutos	4-5 días	Sí	5-10 min	No			Utilizo los descansos para trabajo técnico del partido	Durante el calentamiento inicial
2021-09-18 14:25:53	Sí	1996-10-20	Mujer	176	79	Granada	Regional/Autonómica	local (6 años) regional (4 años)	2020-2021	Categoría senior, Categorías inferiores	7 o más partidos/semana	Nacional y provincial	Sí	No	Para mantener o desarrollar la resistencia aeróbica (natación, ciclismo, carrera, saltar a la comba, etc.), Para mantener o desarrollar la fuerza muscular (diferentes técnicas de fortalecimiento muscular con máquinas, con peso libre, con el propio peso corporal, con gomas elásticas, etc.), Para mantener o desarrollar la velocidad (capacidad de realizar sprints en el menor tiempo posible y de repe…	Más de 60 minutos	6-7 días	No		No			Prefiero hablar con el compañero sobre el partido	Al finalizar el partido
2021-09-18 14:26:15	Sí	1994-09-22	Hombre	180	86	Granada	Local, Regional/Autonómica	Local (10 años) Autonómico (5 años)	2020-2021	Categoría senior, Categorías inferiores	Entre 3 y 4 partidos/semana	1a Nacional Andaluza	Sí	No	Para mantener o desarrollar la resistencia aeróbica (natación, ciclismo, carrera, saltar a la comba, etc.), Para mantener o desarrollar la fuerza muscular (diferentes técnicas de fortalecimiento muscular con máquinas, con peso libre, con el propio peso corporal, con gomas elásticas, etc.), Para mantener o desarrollar otras capacidades (coordinación, equilibrio, agilidad)	Entre 45 y 60 minutos	2-3 días	Sí	10-15 Minutos	No			No hay tiempo suficiente para ello.	Durante el calentamiento inicial
2021-09-18 14:26:21	Sí	1995-08-18	Hombre	190	82	Madrid	Local, Regional/Autonómica	8	2020-2021	Categoría senior, Categorías inferiores	Entre 2 y 3 partidos/semana	Provincial y primera nacional	Sí	No	Para mantener o desarrollar la resistencia aeróbica (natación, ciclismo, carrera, saltar a la comba, etc.), Para mantener o desarrollar la fuerza muscular (diferentes técnicas de fortalecimiento muscular con máquinas, con peso libre, con el propio peso corporal, con gomas elásticas, etc.), Para mantener o desarrollar la velocidad (capacidad de realizar sprints en el menor tiempo posible y de repe…	Más de 60 minutos	6-7 días	Sí	10 minutos	No			Nunca me he planteado esta opción	Durante el calentamiento inicial, Al finalizar el partido
2021-09-18 14:26:23	Sí	1992-04-05	Hombre	193	90	Jerez, Cadiz	Local, Regional/Autonómica	4/2	2019-2020	Categoría senior	Entre 3 y 4 partidos/semana	Nacional	Sí	Sí	Para mantener o desarrollar la resistencia aeróbica (natación, ciclismo, carrera, saltar a la comba, etc.), Para mantener o desarrollar la fuerza muscular (diferentes técnicas de fortalecimiento muscular con máquinas, con peso libre, con el propio peso corporal, con gomas elásticas, etc.), Para mantener o desarrollar la velocidad (capacidad de realizar sprints en el menor tiempo posible y de repe…	Más de 60 minutos	6-7 días	Sí	10 minutos	No	Trotar o correr, Estiramientos y movilidad articular		Sigo activo durante el descanso intentando no relajarme en exceso	Durante el calentamiento inicial
2021-09-18 14:26:32	Sí	1992-01-02	Hombre	1.78	73	Málaga	Regional/Autonómica	9	2020-2021	Categoría senior	Entre 2 y 3 partidos/semana	NACIONAL	Sí	No	Para mantener o desarrollar la resistencia aeróbica (natación, ciclismo, carrera, saltar a la comba, etc.), Para mantener o desarrollar la fuerza muscular (diferentes técnicas de fortalecimiento muscular con máquinas, con peso libre, con el propio peso corporal, con gomas elásticas, etc.), Para mantener o desarrollar la velocidad (capacidad de realizar sprints en el menor tiempo posible y de repe…	Entre 30 y 45 minutos	4-5 días	Sí	25	No	Otras		Desgana	Durante el calentamiento inicial, Al finalizar el partido
2021-09-18 14:26:43	Sí	1994-12-30	Hombre	182	92	Granada	Local	4	2020-2021	Categoría senior, Categorías inferiores	Entre 6 y 7 partidos semana	Provincial	Sí	No	Para mantener o desarrollar la resistencia aeróbica (natación, ciclismo, carrera, saltar a la comba, etc.), Para mantener o desarrollar la velocidad (capacidad de realizar sprints en el menor tiempo posible y de repetirlos el mayor número de veces)	Entre 30 y 45 minutos	4-5 días	Sí	10	Sí	Correr a máxima velocidad (esprintar), Estiramientos y movilidad articular	Para no entrar en frío en la segunda parte		Durante el calentamiento inicial, Durante el descanso entre mitades
2021-09-18 14:26:44	Sí	1998-08-17	Mujer	172	63	Sevilla	Local, Regional/Autonómica	Local 7 años. Regional 1 Temporada	2018-2019	Categoría senior, Categorías inferiores	Entre 4 y 5 partidos/semana	Categoría provincial	Sí	No	Para mantener o desarrollar la resistencia aeróbica (natación, ciclismo, carrera, saltar a la comba, etc.), Para mantener o desarrollar la fuerza muscular (diferentes técnicas de fortalecimiento muscular con máquinas, con peso libre, con el propio peso corporal, con gomas elásticas, etc.), Para mantener o desarrollar la velocidad (capacidad de realizar sprints en el menor tiempo posible y de repe…	Más de 60 minutos	4-5 días	Sí	4 minutos	No			El tiempo es relativamente corto (10 minutos).	Al finalizar el partido	Normalmente los uso como relajación o enfriamiento
2021-09-18 14:26:45	Sí	1995-11-07	Hombre	174	72	Tarifa, Cádiz	Regional/Autonómica	Regional 6 años	2020-2021	Categoría senior	Entre 2 y 3 partidos/semana	Primera Nacional	Sí	No	Para mantener o desarrollar la resistencia aeróbica (natación, ciclismo, carrera, saltar a la comba, etc.), Para mantener o desarrollar la fuerza muscular (diferentes técnicas de fortalecimiento muscular con máquinas, con peso libre, con el propio peso corporal, con gomas elásticas, etc.), Para mantener o desarrollar la velocidad (capacidad de realizar sprints en el menor tiempo posible y de repe…	Entre 45 y 60 minutos	4-5 días	Sí	4 minutos	Sí	Trotar o correr, Correr a máxima velocidad (esprintar), Estiramientos y movilidad articular, Técnicas de manejo de la respiración (activación/relajación, conciencia)	Saltos, carrera en pasillo y estiramientos activos		Durante el calentamiento inicial, Al finalizar el partido
2021-09-18 14:27:06	Sí	1996-01-21	Mujer	170	64	San Fernando, Cádiz	Local, Regional/Autonómica	Local (4 años), Regional (1 año)	2020-2021	Categoría senior, Categorías inferiores	Entre 3 y 4 partidos/semana	FAB	Sí	No	Para mantener o desarrollar la fuerza muscular (diferentes técnicas de fortalecimiento muscular con máquinas, con peso libre, con el propio peso corporal, con gomas elásticas, etc.)	Entre 45 y 60 minutos	2-3 días	Sí	10 minutos	No			No me hace falta	Durante el calentamiento inicial
2021-09-18 14:27:32	Sí	1991-08-27	Hombre	183	110	Granada	Local, Regional/Autonómica	Local (15 años), regional/autonómica (8 años)	2020-2021	Categoría senior, Categorías inferiores	Entre 2 y 3 partidos/semana	FAB y FABGranada	Sí	Sí	Para mantener o desarrollar la resistencia aeróbica (natación, ciclismo, carrera, saltar a la comba, etc.), Para mantener o desarrollar la fuerza muscular (diferentes técnicas de fortalecimiento muscular con máquinas, con peso libre, con el propio peso corporal, con gomas elásticas, etc.)	Entre 30 y 45 minutos	2-3 días	Sí	5 minutos	No			No creo que el tiempo de parada sea necesario.	Durante el calentamiento inicial, Al finalizar el partido
2021-09-18 14:27:37	Sí	1998-05-18	Hombre	191	76	Almería	Local, Regional/Autonómica	Local 2, regional 2	2020-2021	Categoría senior, Categorías inferiores	Entre 5 y 6 partidos semana	1a Nacional andaluza	Sí	No	Para mantener o desarrollar la resistencia aeróbica (natación, ciclismo, carrera, saltar a la comba, etc.), Para mantener o desarrollar la fuerza muscular (diferentes técnicas de fortalecimiento muscular con máquinas, con peso libre, con el propio peso corporal, con gomas elásticas, etc.)	Entre 45 y 60 minutos	4-5 días	Sí	5 minutos	No			Nunca me lo había planteado. Siempre suelo entrar activo al tercer cuarto sin necesidad de ejercitarme	Durante el calentamiento inicial
2021-09-18 14:27:41	Sí	1991-09-05	Hombre	178	84	Cádiz	Regional/Autonómica	4	2020-2021	Categoría senior, Categorías inferiores	Entre 2 y 3 partidos/semana	Nacional	Sí	No	Para mantener o desarrollar la fuerza muscular (diferentes técnicas de fortalecimiento muscular con máquinas, con peso libre, con el propio peso corporal, con gomas elásticas, etc.)	Más de 60 minutos	4-5 días	Sí	5-10 minutos	No			Lectura de partido y relación física	Durante el calentamiento inicial
2021-09-18 14:27:44	Sí	2000-04-11	Hombre	187	71	Cádiz	Local, Regional/Autonómica	Local 5 años. Regional/autonómica sin experiencia	2020-2021	Categoría senior, Categorías inferiores	Entre 3 y 4 partidos/semana	FAB	Sí	No	Para mantener o desarrollar la resistencia aeróbica (natación, ciclismo, carrera, saltar a la comba, etc.), Para mantener o desarrollar otras capacidades (coordinación, equilibrio, agilidad)	Entre 15 y 30 minutos	2-3 días	Sí	5 minutos de carrera	No	Otras		El descanso suelo utilizarlo para hablar con el compañero sobre aspectos del partido	Durante el calentamiento inicial
2021-09-18 14:28:03	Sí	1997-02-28	Hombre	187	89	Jaén	Local, Nacional	Local 4 años - Nacional 2 años	2020-2021	Categoría senior, Categorías inferiores	Entre 4 y 5 partidos/semana	Nacional y Provincial	No	No		Entre 45 y 60 minutos	4-5 días	Sí	5-10 min	No			Descanso corporal, hidratación	Durante el calentamiento inicial, Al finalizar el partido
2021-09-18 14:28:04	Sí	1993-03-27	Hombre	187	90	Almeria	Local, Regional/Autonómica	Local (7 años) regional ( 4 años)	2020-2021	Categoría senior, Categorías inferiores	7 o más partidos/semana	Primera Nacional	Sí	No	Para mantener o desarrollar la resistencia aeróbica (natación, ciclismo, carrera, saltar a la comba, etc.), Para mantener o desarrollar la fuerza muscular (diferentes técnicas de fortalecimiento muscular con máquinas, con peso libre, con el propio peso corporal, con gomas elásticas, etc.), Para mantener o desarrollar la velocidad (capacidad de realizar sprints en el menor tiempo posible y de repe…	Entre 45 y 60 minutos	4-5 días	Sí	10 minutos	Sí	Estiramientos y movilidad articular	Para evitar lesiones		Durante el calentamiento inicial, Durante el descanso entre mitades, Al finalizar el partido
2021-09-18 14:28:10	Sí	2002-11-15	Hombre	176	58'5	Jaén, Jaén	Local, Regional/Autonómica	Local 3 años	2020-2021	Categoría senior, Categorías inferiores	Entre 4 y 5 partidos/semana	Provincial	Sí	No	Para mantener o desarrollar la resistencia aeróbica (natación, ciclismo, carrera, saltar a la comba, etc.)	Entre 45 y 60 minutos	2-3 días	No		No				Durante el calentamiento inicial
2021-09-18 14:28:20	Sí	1995-07-01	Hombre	177	75	Granada	Local, Regional/Autonómica	6	2020-2021	Categoría senior	7 o más partidos/semana	Provincial, autonómica N1	Sí	No	Para mantener o desarrollar la resistencia aeróbica (natación, ciclismo, carrera, saltar a la comba, etc.), Para mantener o desarrollar la fuerza muscular (diferentes técnicas de fortalecimiento muscular con máquinas, con peso libre, con el propio peso corporal, con gomas elásticas, etc.), Para mantener o desarrollar la velocidad (capacidad de realizar sprints en el menor tiempo posible y de repe…	Más de 60 minutos	2-3 días	Sí	Entre 5-8 min	No	Trotar o correr, Correr a máxima velocidad (esprintar), Estiramientos y movilidad articular		Nunca me lo había planteado	Durante el calentamiento inicial, Al finalizar el partido
2021-09-18 14:28:21	Sí	1995-10-23	Hombre	175	70.5	Almeria	Local	7	2020-2021	Categoría senior, Categorías inferiores	7 o más partidos/semana	Provincial	Sí	No	Para mantener o desarrollar la resistencia aeróbica (natación, ciclismo, carrera, saltar a la comba, etc.), Para mantener o desarrollar la fuerza muscular (diferentes técnicas de fortalecimiento muscular con máquinas, con peso libre, con el propio peso corporal, con gomas elásticas, etc.), Para mantener o desarrollar la velocidad (capacidad de realizar sprints en el menor tiempo posible y de repe…	Más de 60 minutos	4-5 días	Sí	10-15	Sí	Estiramientos y movilidad articular, Ejercicios de coordinación y equilibrio	Evitar lesiones		Durante el calentamiento inicial, Durante el descanso entre mitades, Al finalizar el partido
2021-09-18 14:28:25	Sí	1994-04-04	Mujer	172	66	Huelva	Local, Regional/Autonómica	Local (10 años) autonómica (3 años)	2020-2021	Categoría senior, Categorías inferiores	Entre 4 y 5 partidos/semana	Categoría local y autonómico	Sí	No	Para mantener o desarrollar la resistencia aeróbica (natación, ciclismo, carrera, saltar a la comba, etc.), Para mantener o desarrollar la fuerza muscular (diferentes técnicas de fortalecimiento muscular con máquinas, con peso libre, con el propio peso corporal, con gomas elásticas, etc.), Para mantener o desarrollar la velocidad (capacidad de realizar sprints en el menor tiempo posible y de repe…	Entre 45 y 60 minutos	4-5 días	Sí	5-10 minutos	No			Invierto el tiempo en recuperación	Al finalizar el partido	No hay evidencia científica de su beneficio post entrenamiento o partido
2021-09-18 14:28:32	Sí	2001-08-11	Hombre	190	70	Huércal de Almería, Almería	Local, Regional/Autonómica	Local 7 años autonómica 1 año	2020-2021	Categoría senior, Categorías inferiores	7 o más partidos/semana	Nacional 1 2020-2021	Sí	No	Para mantener o desarrollar la resistencia aeróbica (natación, ciclismo, carrera, saltar a la comba, etc.)	Entre 30 y 45 minutos	4-5 días	Sí	10 minutos	Sí	Trotar o correr, Correr a máxima velocidad (esprintar), Estiramientos y movilidad articular	Para seguir concentrado y volver a activarme		Durante el calentamiento inicial, Durante el descanso entre mitades
2021-09-18 14:29:02	Sí	1995-01-09	Hombre	180	80	Almería	Local, Regional/Autonómica	Local (11años), autonómico (1er año)	2020-2021	Categoría senior, Categorías inferiores	7 o más partidos/semana	Provincial y campeonatos autonómicos	Sí	No	Para mantener o desarrollar la resistencia aeróbica (natación, ciclismo, carrera, saltar a la comba, etc.), Para mantener o desarrollar la fuerza muscular (diferentes técnicas de fortalecimiento muscular con máquinas, con peso libre, con el propio peso corporal, con gomas elásticas, etc.), Para mantener o desarrollar la flexibilidad (ya sea con el propio cuerpo, ayuda de otra persona, o con eleme…	Entre 45 y 60 minutos	4-5 días	Sí	5-10min	No			No se ha planteado el realizar ejercicio al descanso	Durante el calentamiento inicial, Durante el descanso entre mitades, Al finalizar el partido
2021-09-18 14:29:10	Sí	1998-10-14	Hombre	179	82	Málaga	Regional/Autonómica	Local(5 años), regional/autonómico(2 años)	2020-2021	Categoría senior, Categorías inferiores	Entre 4 y 5 partidos/semana	Regional	Sí	No	Para mantener o desarrollar la resistencia aeróbica (natación, ciclismo, carrera, saltar a la comba, etc.), Para mantener o desarrollar la fuerza muscular (diferentes técnicas de fortalecimiento muscular con máquinas, con peso libre, con el propio peso corporal, con gomas elásticas, etc.)	Entre 45 y 60 minutos	4-5 días	Sí	10 minutos	No			Tiempo	Durante el calentamiento inicial
2021-09-18 14:29:26	Sí	1995-10-02	Hombre	176.8	69	Arcos de la Frontera, Cádiz	Local, Regional/Autonómica	regional/autonómica(5 años)	2020-2021	Categoría senior, Categorías inferiores	Entre 4 y 5 partidos/semana	Fab	Sí	Sí	Para mantener o desarrollar la resistencia aeróbica (natación, ciclismo, carrera, saltar a la comba, etc.), Para mantener o desarrollar la fuerza muscular (diferentes técnicas de fortalecimiento muscular con máquinas, con peso libre, con el propio peso corporal, con gomas elásticas, etc.)	Más de 60 minutos	4-5 días	Sí	5-10 minutos	No			Intento comunicarme con mi compañero sobre cómo va el partido, aspectos a mejoras.	Al finalizar el partido
2021-09-18 14:29:31	Sí	1993-05-11	Mujer	180	75	Málaga	Nacional	6	2020-2021	Categoría senior, Categorías inferiores	7 o más partidos/semana	Primera Nacional	Sí	No	Para mantener o desarrollar la resistencia aeróbica (natación, ciclismo, carrera, saltar a la comba, etc.), Para mantener o desarrollar la fuerza muscular (diferentes técnicas de fortalecimiento muscular con máquinas, con peso libre, con el propio peso corporal, con gomas elásticas, etc.)	Más de 60 minutos	4-5 días	Sí	20 minutos	No	Trotar o correr, Correr a máxima velocidad (esprintar), Estiramientos y movilidad articular, Otras	Volver a concentrarme		Durante el calentamiento inicial
2021-09-18 14:29:36	Sí	1985-11-02	Hombre	1'88	90	Almería	Local, Regional/Autonómica	17	2018-2019	Categoría senior, Categorías inferiores	Entre 5 y 6 partidos semana	1a Nacional	Sí	No	Para mantener o desarrollar la fuerza muscular (diferentes técnicas de fortalecimiento muscular con máquinas, con peso libre, con el propio peso corporal, con gomas elásticas, etc.)	Entre 45 y 60 minutos	2-3 días	Sí	10	Sí	Trotar o correr, Estiramientos y movilidad articular	Estar preparado para el siguiente cuarto.		Durante el calentamiento inicial, Durante el descanso entre mitades, Al finalizar el partido
2021-09-18 14:29:55	Sí	1988-04-04	Hombre	1.76	83	Andújar Jaén	Regional/Autonómica	6	2020-2021	Categoría senior, Categorías inferiores	Entre 3 y 4 partidos/semana	Nacional andaluza	Sí	No	Para mantener o desarrollar la resistencia aeróbica (natación, ciclismo, carrera, saltar a la comba, etc.), Para mantener o desarrollar la fuerza muscular (diferentes técnicas de fortalecimiento muscular con máquinas, con peso libre, con el propio peso corporal, con gomas elásticas, etc.), Para mantener o desarrollar la flexibilidad (ya sea con el propio cuerpo, ayuda de otra persona, o con eleme…	Entre 45 y 60 minutos	2-3 días	Sí	5-7 min	No			Por descanso, me viene mejor	Durante el calentamiento inicial, Durante el descanso entre mitades, Al finalizar el partido
2021-09-18 14:30:13	Sí	1992-10-26	Mujer	181	73	Córdoba	Local, Nacional	Local (7 años), nacional(4 años)	2020-2021	Categoría senior, Categorías inferiores	Entre 3 y 4 partidos/semana	Mini, infantil, cadete, senior	Sí	Sí	Para mantener o desarrollar la resistencia aeróbica (natación, ciclismo, carrera, saltar a la comba, etc.), Para mantener o desarrollar la fuerza muscular (diferentes técnicas de fortalecimiento muscular con máquinas, con peso libre, con el propio peso corporal, con gomas elásticas, etc.), Para mantener o desarrollar la velocidad (capacidad de realizar sprints en el menor tiempo posible y de repe…	Más de 60 minutos	2-3 días	Sí	8-12 minutos	Sí	Ejercicio de fuerza (saltos, flexiones, etc.), Estiramientos y movilidad articular	Para estar preparada físicamente en el partido y prevenir lesiones		Durante el calentamiento inicial, Durante el descanso entre mitades
2021-09-18 14:30:43	Sí	1998-01-15	Mujer	1.80	61	Bailén	Local, Regional/Autonómica	4	2020-2021	Categoría senior, Categorías inferiores	Entre 6 y 7 partidos semana	Provincial	Sí	No	Para mantener o desarrollar la resistencia aeróbica (natación, ciclismo, carrera, saltar a la comba, etc.), Para mantener o desarrollar la fuerza muscular (diferentes técnicas de fortalecimiento muscular con máquinas, con peso libre, con el propio peso corporal, con gomas elásticas, etc.)	Entre 30 y 45 minutos	2-3 días	Sí	10 min	Sí	Trotar o correr, Estiramientos y movilidad articular	Para evitar lesiones y tener una buena recuperación		Durante el calentamiento inicial, Al finalizar el partido
2021-09-18 14:30:45	Sí	1991-12-30	Mujer	1.63	55	Málaga	Regional/Autonómica	Local (5) autonomica (1) nacional (0)	2018-2019	Categoría senior	7 o más partidos/semana	Provincial	Sí	No	Para mantener o desarrollar la resistencia aeróbica (natación, ciclismo, carrera, saltar a la comba, etc.), Para mantener o desarrollar la flexibilidad (ya sea con el propio cuerpo, ayuda de otra persona, o con elementos como toallas, gomas elásticas, foam roller, etc.)	Entre 30 y 45 minutos	6-7 días	Sí	10 min	No	Trotar o correr, Correr a máxima velocidad (esprintar), Estiramientos y movilidad articular			Durante el calentamiento inicial, Al finalizar el partido
2021-09-18 14:31:04	Sí	1982-05-29	Mujer	165	65	Málaga	Regional/Autonómica	Local 22 años, autonomica 10 años	2020-2021	Categoría senior, Categorías inferiores	7 o más partidos/semana	Nacional	Sí	No	Para mantener o desarrollar la resistencia aeróbica (natación, ciclismo, carrera, saltar a la comba, etc.), Para mantener o desarrollar la fuerza muscular (diferentes técnicas de fortalecimiento muscular con máquinas, con peso libre, con el propio peso corporal, con gomas elásticas, etc.), Para mantener o desarrollar la velocidad (capacidad de realizar sprints en el menor tiempo posible y de repe…	Entre 45 y 60 minutos	4-5 días	Sí	10 minutos	Sí	Trotar o correr, Ejercicio de fuerza (saltos, flexiones, etc.), Estiramientos y movilidad articular, Ejercicios de coordinación y equilibrio	Porque no quiero parar		Durante el calentamiento inicial, Al finalizar el partido
2021-09-18 14:31:07	Sí	1997-02-06	Mujer	176	62	Málaga	Regional/Autonómica	Local (5 años), autonómico (2 años)	2018-2019	Categoría senior	Entre 3 y 4 partidos/semana	N1	Sí	Sí	Para mantener o desarrollar la resistencia aeróbica (natación, ciclismo, carrera, saltar a la comba, etc.), Para mantener o desarrollar la fuerza muscular (diferentes técnicas de fortalecimiento muscular con máquinas, con peso libre, con el propio peso corporal, con gomas elásticas, etc.), Para mantener o desarrollar otras capacidades (coordinación, equilibrio, agilidad)	Más de 60 minutos	4-5 días	Sí	15 minutos	Sí	Trotar o correr	Para evitar lesiones		Durante el calentamiento inicial, Durante el descanso entre mitades, Al finalizar el partido
2021-09-18 14:32:26	Sí	2002-08-05	Hombre	182	73	Málaga	Nacional	Local 3 años Nacional 0 años	2020-2021	Categoría senior, Categorías inferiores	Entre 3 y 4 partidos/semana	Provincial local	Sí	No	Para mantener o desarrollar la resistencia aeróbica (natación, ciclismo, carrera, saltar a la comba, etc.), Para mantener o desarrollar la fuerza muscular (diferentes técnicas de fortalecimiento muscular con máquinas, con peso libre, con el propio peso corporal, con gomas elásticas, etc.), Para mantener o desarrollar la velocidad (capacidad de realizar sprints en el menor tiempo posible y de repe…	Entre 45 y 60 minutos	2-3 días	No		No				Durante el calentamiento inicial
2021-09-18 14:32:30	Sí	2021-10-20	Hombre	177	62	Marbella	Regional/Autonómica, Nacional	Regional/autonómico 16 años, nacional 4 años	2020-2021	Categoría senior, Categorías inferiores	Entre 2 y 3 partidos/semana	N1	Sí	No	Para mantener o desarrollar la resistencia aeróbica (natación, ciclismo, carrera, saltar a la comba, etc.), Para mantener o desarrollar la fuerza muscular (diferentes técnicas de fortalecimiento muscular con máquinas, con peso libre, con el propio peso corporal, con gomas elásticas, etc.)	Entre 45 y 60 minutos	2-3 días	Sí	10 minutos	No			Necesito descansar	Durante el calentamiento inicial
2021-09-18 14:32:31	Sí	1998-12-18	Hombre	181	73	Sevilla	Local, Regional/Autonómica	Local (6 años) Regional (2años)	2020-2021	Categoría senior, Categorías inferiores	Entre 4 y 5 partidos/semana	Provincial, Nacional	Sí	No	Para mantener o desarrollar la resistencia aeróbica (natación, ciclismo, carrera, saltar a la comba, etc.), Para mantener o desarrollar la fuerza muscular (diferentes técnicas de fortalecimiento muscular con máquinas, con peso libre, con el propio peso corporal, con gomas elásticas, etc.)	Entre 45 y 60 minutos	2-3 días	Sí	Entre 15 y 20 minutosty	No			Descanso y vuelta a la calma	Durante el calentamiento inicial, Al finalizar el partido
2021-09-18 14:32:55	Sí	1995-07-28	Hombre	191	79	Granada	Local, Regional/Autonómica	Local 8, Regional 3	2020-2021	Categoría senior, Categorías inferiores	Entre 4 y 5 partidos/semana	Provincial y Nacional	Sí	No	Para mantener o desarrollar la resistencia aeróbica (natación, ciclismo, carrera, saltar a la comba, etc.), Para mantener o desarrollar la fuerza muscular (diferentes técnicas de fortalecimiento muscular con máquinas, con peso libre, con el propio peso corporal, con gomas elásticas, etc.), Para mantener o desarrollar otras capacidades (coordinación, equilibrio, agilidad)	Más de 60 minutos	4-5 días	Sí	5 minutos	Sí	Trotar o correr, Correr a máxima velocidad (esprintar)	Concentración		Durante el calentamiento inicial, Durante el descanso entre mitades
2021-09-18 14:32:59	Sí	1999-10-14	Hombre	1'92	90	Málaga	Nacional	Local (3 años) Nacional (2 años)	2020-2021	Categoría senior	Entre 5 y 6 partidos semana	Provincial y Nacional	Sí	No	Para mantener o desarrollar la resistencia aeróbica (natación, ciclismo, carrera, saltar a la comba, etc.)	Entre 30 y 45 minutos	2-3 días	Sí	15 minutos	No			Charlar de temas técnicos del partido	Durante el calentamiento inicial
2021-09-18 14:33:25	Sí	1997-01-09	Hombre	1'70	57	Málaga	Nacional	Local (5 años), nacional (1 año)	2020-2021	Categoría senior, Categorías inferiores	Entre 4 y 5 partidos/semana	Arbitraje provincial	Sí	No	Para mantener o desarrollar la resistencia aeróbica (natación, ciclismo, carrera, saltar a la comba, etc.), Para mantener o desarrollar la velocidad (capacidad de realizar sprints en el menor tiempo posible y de repetirlos el mayor número de veces)	Entre 45 y 60 minutos	2-3 días	Sí	3-5 minutos	No				Durante el calentamiento inicial, Al finalizar el partido
2021-09-18 14:33:51	Sí	1996-11-15	Mujer	164	51	Huelva	Local, Regional/Autonómica	Local 6 años, Autonomica empezando	2020-2021	Categoría senior, Categorías inferiores	Entre 2 y 3 partidos/semana	Infantil, Cadete, Junior y Senior	Sí	Sí	Para mantener o desarrollar la resistencia aeróbica (natación, ciclismo, carrera, saltar a la comba, etc.), Para mantener o desarrollar la fuerza muscular (diferentes técnicas de fortalecimiento muscular con máquinas, con peso libre, con el propio peso corporal, con gomas elásticas, etc.), Para mantener o desarrollar la velocidad (capacidad de realizar sprints en el menor tiempo posible y de repe…	Entre 30 y 45 minutos	2-3 días	Sí	5 min	No			Por comentar el partido con mis compañeros	Durante el calentamiento inicial
2021-09-18 14:36:40	Sí	1995-03-15	Hombre	192	85	Almeria	Local, Regional/Autonómica, Nacional	Local 10, autonomico 5, nacional 1, internacional (sin experiencia)	2018-2019	Categoría senior, Categorías inferiores	7 o más partidos/semana	Nacional (autonómico)	Sí	No	Para mantener o desarrollar la resistencia aeróbica (natación, ciclismo, carrera, saltar a la comba, etc.), Para mantener o desarrollar la fuerza muscular (diferentes técnicas de fortalecimiento muscular con máquinas, con peso libre, con el propio peso corporal, con gomas elásticas, etc.), Para mantener o desarrollar la velocidad (capacidad de realizar sprints en el menor tiempo posible y de repe…	Entre 15 y 30 minutos	4-5 días	Sí	10-15 minutos	No			Prefiero recuperar y una vez vuelta al campo ir reactivando de forma progresiva con un poco de movilidad	Durante el calentamiento inicial, Durante el descanso entre mitades, Al finalizar el partido
2021-09-18 14:41:44	Sí	1986-06-05	Hombre	173	70	Almería, Almería	Local, Regional/Autonómica, Nacional	Local (18 años); Autonómica (13 años); Nacional (5 años)	2018-2019	Categoría senior, Categorías inferiores	Entre 1 y 2 partidos/semana	En la 2018-2019, autonómica FAB	Sí	Sí	Para mantener o desarrollar la resistencia aeróbica (natación, ciclismo, carrera, saltar a la comba, etc.), Para mantener o desarrollar la fuerza muscular (diferentes técnicas de fortalecimiento muscular con máquinas, con peso libre, con el propio peso corporal, con gomas elásticas, etc.), Para mantener o desarrollar la velocidad (capacidad de realizar sprints en el menor tiempo posible y de repe…	Entre 45 y 60 minutos	2-3 días	Sí	5 minutos	No			No lo necesito	Durante el calentamiento inicial
2021-09-18 15:16:10	Sí	1995-07-03	Hombre	186	85	Zaragoza	Local, Regional/Autonómica, Nacional	Local(7 años), autonómica(6 años), nacional(1 año), internacional (sin experiencia)	2020-2021	Categoría senior, Categorías inferiores	7 o más partidos/semana	Grupo 3 FEB	Sí	No	Para mantener o desarrollar la resistencia aeróbica (natación, ciclismo, carrera, saltar a la comba, etc.), Para mantener o desarrollar la fuerza muscular (diferentes técnicas de fortalecimiento muscular con máquinas, con peso libre, con el propio peso corporal, con gomas elásticas, etc.), Para mantener o desarrollar la flexibilidad (ya sea con el propio cuerpo, ayuda de otra persona, o con eleme…	Más de 60 minutos	4-5 días	No		No				Durante el calentamiento inicial
2021-09-18 15:22:15	Sí	1999-06-14	Hombre	171	72	Huesca	Regional/Autonómica	5	2020-2021	Categoría senior	Entre 2 y 3 partidos/semana	Grupo 2	Sí	No	Para mantener o desarrollar la resistencia aeróbica (natación, ciclismo, carrera, saltar a la comba, etc.), Para mantener o desarrollar la fuerza muscular (diferentes técnicas de fortalecimiento muscular con máquinas, con peso libre, con el propio peso corporal, con gomas elásticas, etc.), Para mantener o desarrollar la velocidad (capacidad de realizar sprints en el menor tiempo posible y de repe…	Más de 60 minutos	4-5 días	Sí	10	No				Durante el calentamiento inicial, Durante el descanso entre mitades
2021-09-18 15:35:47	Sí	1996-07-22	Hombre	164	68	Zaragoza	Local, Regional/Autonómica	7 (local) y 5 (auto)	2018-2019	Categoría senior, Categorías inferiores	Entre 5 y 6 partidos semana	Autonómica 2-3	Sí	No	Para mantener o desarrollar la resistencia aeróbica (natación, ciclismo, carrera, saltar a la comba, etc.), Para mantener o desarrollar la fuerza muscular (diferentes técnicas de fortalecimiento muscular con máquinas, con peso libre, con el propio peso corporal, con gomas elásticas, etc.), Para mantener o desarrollar la flexibilidad (ya sea con el propio cuerpo, ayuda de otra persona, o con eleme…	Más de 60 minutos	4-5 días	Sí	5-6	Sí	Estiramientos y movilidad articular	No desconectar		Durante el calentamiento inicial, Durante el descanso entre mitades
2021-09-18 15:43:19	Sí	1995-05-08	Hombre	172	75	Zaragoza	Local, Regional/Autonómica	Local y regional (7años)	2018-2019	Categoría senior, Categorías inferiores	7 o más partidos/semana	Hasta primera Nacional masculina A1	Sí	Sí	Para mantener o desarrollar la resistencia aeróbica (natación, ciclismo, carrera, saltar a la comba, etc.), Para mantener o desarrollar la fuerza muscular (diferentes técnicas de fortalecimiento muscular con máquinas, con peso libre, con el propio peso corporal, con gomas elásticas, etc.), Para mantener o desarrollar la flexibilidad (ya sea con el propio cuerpo, ayuda de otra persona, o con eleme…	Más de 60 minutos	4-5 días	Sí	5 minutos	No	Trotar o correr, Correr a máxima velocidad (esprintar), Estiramientos y movilidad articular		Utilizo la mayor tiempo del descanso hablando con el compañero sobre cómo estamos llevando el partido y aspectos a trabajar en la segunda parte	Durante el calentamiento inicial
2021-09-18 15:44:44	Sí	1998-11-26	Hombre	178	70	Zaragoza	Regional/Autonómica	Local (5 años) autonómica (2 años)	2019-2020	Categoría senior	Entre 5 y 6 partidos semana	Autonómica A2	Sí	No	Para mantener o desarrollar la resistencia aeróbica (natación, ciclismo, carrera, saltar a la comba, etc.)	Entre 30 y 45 minutos	4-5 días	No		Sí	Correr a máxima velocidad (esprintar), Estiramientos y movilidad articular	Continuar con el ritmo se que lleva previo al parón		Durante el calentamiento inicial
2021-09-18 15:45:30	Sí	1979-01-19	Hombre	182	88	Zaragoza	Nacional	Nacional 15 años	2020-2021	Categoría senior	Entre 2 y 3 partidos/semana	Nacional	Sí	No	Para mantener o desarrollar la resistencia aeróbica (natación, ciclismo, carrera, saltar a la comba, etc.), Para mantener o desarrollar la velocidad (capacidad de realizar sprints en el menor tiempo posible y de repetirlos el mayor número de veces), Para mantener o desarrollar la flexibilidad (ya sea con el propio cuerpo, ayuda de otra persona, o con elementos como toallas, gomas elásticas, foam …	Entre 30 y 45 minutos	2-3 días	Sí	5 minutos	Sí	Estiramientos y movilidad articular	Hay que estirar y mantener caliente los músculos		Durante el descanso entre mitades, Al finalizar el partido
2021-09-18 15:46:57	Sí	1994-12-21	Hombre	188	82	Zaragoza	Nacional	Nacional (5) autonómico 5 más en total 10	2020-2021	Categoría senior	Entre 3 y 4 partidos/semana	Grupo 1	Sí	No	Para mantener o desarrollar la resistencia aeróbica (natación, ciclismo, carrera, saltar a la comba, etc.), Para mantener o desarrollar la fuerza muscular (diferentes técnicas de fortalecimiento muscular con máquinas, con peso libre, con el propio peso corporal, con gomas elásticas, etc.)	Más de 60 minutos	4-5 días	Sí	10 minutos	No			No lo he visto conveniente	Durante el calentamiento inicial
2021-09-18 15:54:39	Sí	2000-05-30	Mujer	169	58	Zaragoza	Regional/Autonómica	5 años	2018-2019	Categoría senior	Entre 5 y 6 partidos semana	Autonómica 3	Sí	No	Para mantener o desarrollar la resistencia aeróbica (natación, ciclismo, carrera, saltar a la comba, etc.), Para mantener o desarrollar la fuerza muscular (diferentes técnicas de fortalecimiento muscular con máquinas, con peso libre, con el propio peso corporal, con gomas elásticas, etc.)	Más de 60 minutos	4-5 días	No		No			No me lo había planteado	Durante el calentamiento inicial
2021-09-18 16:04:01	Sí	2000-05-08	Hombre	175	60	Córdoba	Local	3	2020-2021	Categoría senior, Categorías inferiores	Entre 2 y 3 partidos/semana	Provincial	Sí	No	Para mantener o desarrollar la fuerza muscular (diferentes técnicas de fortalecimiento muscular con máquinas, con peso libre, con el propio peso corporal, con gomas elásticas, etc.)	Entre 30 y 45 minutos	2-3 días	No		No				Durante el calentamiento inicial, Al finalizar el partido
2021-09-18 16:06:06	Sí	1993-09-19	Mujer	172	58	Córdoba	Nacional	8 años	2020-2021	Categoría senior	Entre 3 y 4 partidos/semana	N1 y provincial	Sí	Sí	Para mantener o desarrollar la fuerza muscular (diferentes técnicas de fortalecimiento muscular con máquinas, con peso libre, con el propio peso corporal, con gomas elásticas, etc.)	Más de 60 minutos	4-5 días	Sí	10 minutos	No	Trotar o correr, Ejercicio de fuerza (saltos, flexiones, etc.), Estiramientos y movilidad articular, Ejercicios de coordinación y equilibrio, Técnicas de manejo de la respiración (activación/relajación, conciencia)		Falta de tiempo	Durante el calentamiento inicial, Al finalizar el partido
2021-09-18 16:06:11	Sí	1997-04-06	Hombre	180	75	Granada	Local, Regional/Autonómica	Local (6), regional (1)	2020-2021	Categoría senior, Categorías inferiores	7 o más partidos/semana	Local	Sí	No	Para mantener o desarrollar la resistencia aeróbica (natación, ciclismo, carrera, saltar a la comba, etc.), Para mantener o desarrollar la fuerza muscular (diferentes técnicas de fortalecimiento muscular con máquinas, con peso libre, con el propio peso corporal, con gomas elásticas, etc.), Para mantener o desarrollar la velocidad (capacidad de realizar sprints en el menor tiempo posible y de repe…	Entre 45 y 60 minutos	4-5 días	No		No			Me mantengo activo	Durante el calentamiento inicial, Al finalizar el partido
2021-09-18 16:06:57	Sí	1986-02-10	Hombre	173	85	Sevill	Local, Regional/Autonómica	Local 2, autonomica 12	2018-2019	Categoría senior	1 partido/semana	Nacional	Sí	No	Para mantener o desarrollar la resistencia aeróbica (natación, ciclismo, carrera, saltar a la comba, etc.)	Entre 45 y 60 minutos	2-3 días	Sí	8 minutos	No			El descanso dura 10 min y no da tiempo	Nunca	No tengo costumbrep
2021-09-18 16:08:05	Sí	1988-05-26	Hombre	176	77	Córdoba	Regional/Autonómica	Autonómica 10 años	2020-2021	Categoría senior	Entre 1 y 2 partidos/semana	1 div nac	Sí	No	Para mantener o desarrollar la resistencia aeróbica (natación, ciclismo, carrera, saltar a la comba, etc.), Para mantener o desarrollar la fuerza muscular (diferentes técnicas de fortalecimiento muscular con máquinas, con peso libre, con el propio peso corporal, con gomas elásticas, etc.)	Más de 60 minutos	6-7 días	Sí	7 min	No				Al finalizar el partido
2021-09-18 16:11:24	Sí	1992-01-20	Hombre	184	75	Sevilla	Nacional	Local 7 nacional 3	2019-2020	Categoría senior, Categorías inferiores	Entre 4 y 5 partidos/semana	Nacional	Sí	No	Para mantener o desarrollar la resistencia aeróbica (natación, ciclismo, carrera, saltar a la comba, etc.), Para mantener o desarrollar la fuerza muscular (diferentes técnicas de fortalecimiento muscular con máquinas, con peso libre, con el propio peso corporal, con gomas elásticas, etc.), Para mantener o desarrollar la flexibilidad (ya sea con el propio cuerpo, ayuda de otra persona, o con eleme…	Más de 60 minutos	4-5 días	Sí	10	No			Poco tiempo. Y aprovecharlo para charlar con el compañero	Durante el descanso entre mitades, Al finalizar el partido
2021-09-18 16:57:57	Sí	1995-12-15	Mujer	152	50	Zaragoza	Regional/Autonómica	5 años	2018-2019	Categoría senior, Categorías inferiores	7 o más partidos/semana	Provincial 1 y Autonómica 4	Sí	No	Para mantener o desarrollar la resistencia aeróbica (natación, ciclismo, carrera, saltar a la comba, etc.), Para mantener o desarrollar la fuerza muscular (diferentes técnicas de fortalecimiento muscular con máquinas, con peso libre, con el propio peso corporal, con gomas elásticas, etc.)	Entre 30 y 45 minutos	2-3 días	No		No			Porque lo utilizo para comentar la situación del partido.	Durante el calentamiento inicial, Al finalizar el partido
2021-09-18 16:59:46	Sí	1987-07-11	Hombre	180	79	Zaragoza	Internacional	Local 17 años autónomica 16 años nacional 12 años internacional 3 años	2019-2020	Categoría senior	1 partido/semana	ACB	Sí	No	Para mantener o desarrollar la resistencia aeróbica (natación, ciclismo, carrera, saltar a la comba, etc.), Para mantener o desarrollar la fuerza muscular (diferentes técnicas de fortalecimiento muscular con máquinas, con peso libre, con el propio peso corporal, con gomas elásticas, etc.)	Más de 60 minutos	2-3 días	Sí	5-8 minutos	Sí	Estiramientos y movilidad articular, Otras	Recuperación y activación muscular		Durante el calentamiento inicial, Durante el descanso entre mitades
2021-09-18 17:20:09	Sí	1972-02-19	Hombre	180	90	MARACENA GRANADA	Local, Regional/Autonómica, Nacional	LOCAL 30 AÑOS. REGIONAL 20 AÑOS. EBA 7 AÑOS	2020-2021	Categoría senior	Entre 2 y 3 partidos/semana	NACIONAL, PROVINCIAL	Sí	No	Para mantener o desarrollar la resistencia aeróbica (natación, ciclismo, carrera, saltar a la comba, etc.)	Entre 15 y 30 minutos	2-3 días	Sí	15 MINUTOS	No			NO LO HE NECESITADO	Durante el calentamiento inicial, Al finalizar el partido
2021-09-18 17:32:44	Sí	1997-06-28	Hombre	190	80	Chiclana de la Frontera, Cádiz	Regional/Autonómica	8 años	2018-2019	Categoría senior	Entre 1 y 2 partidos/semana	Primera nacional andaluza	Sí	No	Para mantener o desarrollar la fuerza muscular (diferentes técnicas de fortalecimiento muscular con máquinas, con peso libre, con el propio peso corporal, con gomas elásticas, etc.)	Más de 60 minutos	2-3 días	No		No			Aprovechar ese tiempo para descansar y relajar la mente.	Nunca	Sería bueno realizarlo al final del partido, pero con las prisas no lo suelo hacer.
2021-09-18 17:40:32	Sí	1997-08-27	Hombre	181	82	Zaragoza	Regional/Autonómica	7 años	2018-2019	Categoría senior	Entre 6 y 7 partidos semana	Nacional masculino, nacional femenino, 1ª y 2º aragonesa masculina/femenina, Cto Aragon JR masculino/femenino, social oro/bronce, escolares	Sí	No	Para mantener o desarrollar la resistencia aeróbica (natación, ciclismo, carrera, saltar a la comba, etc.), Para mantener o desarrollar la fuerza muscular (diferentes técnicas de fortalecimiento muscular con máquinas, con peso libre, con el propio peso corporal, con gomas elásticas, etc.), Para mantener o desarrollar la velocidad (capacidad de realizar sprints en el menor tiempo posible y de repe…	Más de 60 minutos	4-5 días	No		No			Falta de tiempo/ cansancio	Durante el calentamiento inicial, Al finalizar el partido	Para preparar al cuerpo para el partido, y para volver al reposo
2021-09-18 18:23:20	Sí	1990-09-13	Hombre	187	84	Zaragoza	Local, Regional/Autonómica	Local 3 años, regional/autonómica 6 años	2018-2019	Categoría senior, Categorías inferiores	Entre 4 y 5 partidos/semana	A3,A2,A1,Escolares	Sí	No	Para mantener o desarrollar la resistencia aeróbica (natación, ciclismo, carrera, saltar a la comba, etc.), Para mantener o desarrollar la fuerza muscular (diferentes técnicas de fortalecimiento muscular con máquinas, con peso libre, con el propio peso corporal, con gomas elásticas, etc.), Para mantener o desarrollar otras capacidades (coordinación, equilibrio, agilidad)	Más de 60 minutos	4-5 días	Sí	5-10 minutos	No			No he sentido la necesidad, al menos hasta ahora	Durante el calentamiento inicial, Al finalizar el partido		I hope you get a p 10
2021-09-18 18:35:26	Sí	1978-12-21	Hombre	1.78	88	Córdoba	Regional/Autonómica	Local 21, autonómica 17	2018-2019	Categoría senior, Categorías inferiores	Entre 2 y 3 partidos/semana	Autonomico	Sí	No	Para mantener o desarrollar la resistencia aeróbica (natación, ciclismo, carrera, saltar a la comba, etc.), Para mantener o desarrollar la fuerza muscular (diferentes técnicas de fortalecimiento muscular con máquinas, con peso libre, con el propio peso corporal, con gomas elásticas, etc.)	Entre 45 y 60 minutos	2-3 días	Sí	10	No				Durante el calentamiento inicial
2021-09-18 19:49:10	Sí	1996-06-02	Hombre	171	85	Plasencia, Caceres	Local, Regional/Autonómica	Local (2) regional (1)	2020-2021	Categoría senior, Categorías inferiores	Entre 3 y 4 partidos/semana	Infantil, cadete, junior, senior	Sí	No	Para mantener o desarrollar la resistencia aeróbica (natación, ciclismo, carrera, saltar a la comba, etc.)	Entre 30 y 45 minutos	2-3 días	No	4-5 minutos	No			Descanso y charla con el compañero sobre el partido	Durante el calentamiento inicial
2021-09-18 19:49:31	Sí	2003-06-02	Hombre	172	75	Cáceres	Regional/Autonómica	Local 1 año Regional 4 años	2020-2021	Categoría senior, Categorías inferiores	Entre 5 y 6 partidos semana	Ninguna	Sí	No	Para mantener o desarrollar la resistencia aeróbica (natación, ciclismo, carrera, saltar a la comba, etc.)	Entre 15 y 30 minutos	2-3 días	Sí	5 min	No			Prefiero descansar	Durante el calentamiento inicial
2021-09-18 19:49:55	Sí	1991-09-07	Hombre	190	83	Plasencia, Cáceres	Nacional	Local (5), regional (4), nacional (1)	2019-2020	Categoría senior	Entre 2 y 3 partidos/semana	Fexb grupo 3 (1a nacional)	Sí	No	Para mantener o desarrollar la resistencia aeróbica (natación, ciclismo, carrera, saltar a la comba, etc.), Para mantener o desarrollar la fuerza muscular (diferentes técnicas de fortalecimiento muscular con máquinas, con peso libre, con el propio peso corporal, con gomas elásticas, etc.)	Entre 45 y 60 minutos	6-7 días	Sí	6 minutos	No			Por falta de tiempo disponible	Nunca	No me sirve para activarme
2021-09-18 19:50:08	Sí	1994-02-03	Hombre	185	87	Cáceres	Local, Regional/Autonómica, Nacional	7	2019-2020	Categoría senior	Entre 3 y 4 partidos/semana	WBBL	Sí	No	Para mantener o desarrollar la resistencia aeróbica (natación, ciclismo, carrera, saltar a la comba, etc.), Para mantener o desarrollar la fuerza muscular (diferentes técnicas de fortalecimiento muscular con máquinas, con peso libre, con el propio peso corporal, con gomas elásticas, etc.)	Más de 60 minutos	6-7 días	Sí	5-10m	No			Nunca he sentido la Necesidad de ello.	Durante el calentamiento inicial, Al finalizar el partido
2021-09-18 19:50:09	Sí	1996-04-16	Hombre	176	63	CÁCERES	Local, Regional/Autonómica	Local y regional 3 años	2018-2019	Categoría senior, Categorías inferiores	Entre 4 y 5 partidos/semana	Grupo 4	Sí	No	Para mantener o desarrollar la resistencia aeróbica (natación, ciclismo, carrera, saltar a la comba, etc.), Para mantener o desarrollar la fuerza muscular (diferentes técnicas de fortalecimiento muscular con máquinas, con peso libre, con el propio peso corporal, con gomas elásticas, etc.)	Más de 60 minutos	4-5 días	No		No			Creer no necesitar reactivarme físicamente, al no haberlo hecho nunca.	Nunca	Pensar que no me aportan nada, y no tener rutina de hacerlos.
2021-09-18 19:50:25	Sí	1980-11-15	Mujer	155	58	Mérida	Regional/Autonómica	25 años	2018-2019	Categoría senior, Categorías inferiores	Entre 6 y 7 partidos semana	Grupo4	Sí	No	Para mantener o desarrollar la resistencia aeróbica (natación, ciclismo, carrera, saltar a la comba, etc.), Para mantener o desarrollar otras capacidades (coordinación, equilibrio, agilidad)	Más de 60 minutos	4-5 días	Sí	25 minutos	No			Supongo que falta de rutina	Durante el calentamiento inicial, Al finalizar el partido
2021-09-18 19:50:50	Sí	1994-08-27	Hombre	175	90	Don Benito (BADAJOZ)	Regional/Autonómica	2 años	2019-2020	Categoría senior, Categorías inferiores	Entre 2 y 3 partidos/semana	Grupo 4 FEXB	Sí	Sí	Para mantener o desarrollar la resistencia aeróbica (natación, ciclismo, carrera, saltar a la comba, etc.), Para mantener o desarrollar la fuerza muscular (diferentes técnicas de fortalecimiento muscular con máquinas, con peso libre, con el propio peso corporal, con gomas elásticas, etc.)	Entre 45 y 60 minutos	6-7 días	No		No			No suelo enfriarme durante los descansos	Al finalizar el partido
2021-09-18 19:50:50	Sí	1990-09-17	Mujer	160	48	Villanueva de la Serena	Local, Regional/Autonómica	Local (3 años), autonómica (1 año), nacional e internacional (sin experiencia).	2018-2019	Categoría senior, Categorías inferiores	Entre 3 y 4 partidos/semana	FExB	No					No		No			Nunca me lo había planteado.	Durante el calentamiento inicial, Al finalizar el partido
2021-09-18 19:50:59	Sí	1989-08-04	Hombre	1.81	74	Cáceres	Regional/Autonómica	Local (9 años), regional/autonómica (2 años)	2020-2021	Categoría senior	Entre 4 y 5 partidos/semana	Local y autonómica	Sí	No	Para mantener o desarrollar la resistencia aeróbica (natación, ciclismo, carrera, saltar a la comba, etc.), Para mantener o desarrollar la fuerza muscular (diferentes técnicas de fortalecimiento muscular con máquinas, con peso libre, con el propio peso corporal, con gomas elásticas, etc.), Para mantener o desarrollar la velocidad (capacidad de realizar sprints en el menor tiempo posible y de repe…	Más de 60 minutos	4-5 días	Sí	5 minutos	No	Trotar o correr, Correr a máxima velocidad (esprintar), Estiramientos y movilidad articular			Durante el calentamiento inicial
2021-09-18 19:51:03	Sí	1996-10-03	Hombre	172	77	Badajoz, Badajoz	Local, Regional/Autonómica	Todas 4 años	2019-2020	Categoría senior, Categorías inferiores	Entre 4 y 5 partidos/semana	Grupo 2 fexb	Sí	No	Para mantener o desarrollar la resistencia aeróbica (natación, ciclismo, carrera, saltar a la comba, etc.), Para mantener o desarrollar la fuerza muscular (diferentes técnicas de fortalecimiento muscular con máquinas, con peso libre, con el propio peso corporal, con gomas elásticas, etc.)	Entre 45 y 60 minutos	4-5 días	Sí	10 minutos	No			No es algo en lo que haya pensado nunca	Durante el calentamiento inicial
2021-09-18 19:51:04	Sí	2000-05-08	Hombre	1.85	93.5	Badajoz	Local, Regional/Autonómica	Local 3 años regional y autonómico 1 año	2019-2020	Categorías inferiores	Entre 3 y 4 partidos/semana	Judex	Sí	Sí	Para mantener o desarrollar la resistencia aeróbica (natación, ciclismo, carrera, saltar a la comba, etc.), Para mantener o desarrollar la fuerza muscular (diferentes técnicas de fortalecimiento muscular con máquinas, con peso libre, con el propio peso corporal, con gomas elásticas, etc.)	Entre 45 y 60 minutos	2-3 días	Sí	10-15 minutos	Sí	Estiramientos y movilidad articular	Evitar lesiones		Durante el calentamiento inicial, Durante el descanso entre mitades, Al finalizar el partido
2021-09-18 19:51:08	Sí	1983-02-24	Mujer	1.69	65	Plasencia Cáceres	Nacional	17	2018-2019	Categoría senior, Categorías inferiores	Entre 3 y 4 partidos/semana	Grupo 2 2006-2010	Sí	No	Para mantener o desarrollar la fuerza muscular (diferentes técnicas de fortalecimiento muscular con máquinas, con peso libre, con el propio peso corporal, con gomas elásticas, etc.), Para mantener o desarrollar la flexibilidad (ya sea con el propio cuerpo, ayuda de otra persona, o con elementos como toallas, gomas elásticas, foam roller, etc.), Para mantener o desarrollar otras capacidades (coord…	Entre 30 y 45 minutos	2-3 días	Sí	15	Sí	Estiramientos y movilidad articular, Técnicas de manejo de la respiración (activación/relajación, conciencia), Otras	Activación mental		Durante el calentamiento inicial, Durante el descanso entre mitades, Al finalizar el partido		Good job
2021-09-18 19:51:20	Sí	1999-07-23	Hombre	177	70	Zaragoza	Regional/Autonómica	4	2019-2020	Categoría senior, Categorías inferiores	7 o más partidos/semana	Hasta nacional masculina	No	No	Para mantener o desarrollar la resistencia aeróbica (natación, ciclismo, carrera, saltar a la comba, etc.)	Entre 15 y 30 minutos	1 día	Sí	5-10 minutos	No	Trotar o correr, Correr a máxima velocidad (esprintar), Estiramientos y movilidad articular, Técnicas de manejo de la respiración (activación/relajación, conciencia)		Corta duración de los descansos, es preferible comentar aspectos técnicos del partido con los compañeros.	Durante el calentamiento inicial
2021-09-18 19:51:32	Sí	1994-03-03	Hombre	179	65	Badajoz	Regional/Autonómica	Regional/Autonómica (5 años)	2020-2021	Categoría senior, Categorías inferiores	Entre 4 y 5 partidos/semana	Diputación de Badajoz (Senior) y categorías inferiores	Sí	Sí	Para mantener o desarrollar la resistencia aeróbica (natación, ciclismo, carrera, saltar a la comba, etc.), Para mantener o desarrollar la fuerza muscular (diferentes técnicas de fortalecimiento muscular con máquinas, con peso libre, con el propio peso corporal, con gomas elásticas, etc.), Para mantener o desarrollar la velocidad (capacidad de realizar sprints en el menor tiempo posible y de repe…	Más de 60 minutos	4-5 días	Sí	5-10 minutos	No			Por ningún motivo	Durante el calentamiento inicial
2021-09-18 19:51:36	Sí	1986-10-30	Hombre	172	72	Badajoz	Local, Regional/Autonómica	Local (2 años), Regional/autonómica (3 años)	2020-2021	Categorías inferiores	Entre 5 y 6 partidos semana	Judex, Diputación Badajoz	Sí	No	Para mantener o desarrollar la resistencia aeróbica (natación, ciclismo, carrera, saltar a la comba, etc.), Para mantener o desarrollar la fuerza muscular (diferentes técnicas de fortalecimiento muscular con máquinas, con peso libre, con el propio peso corporal, con gomas elásticas, etc.), Para mantener o desarrollar la velocidad (capacidad de realizar sprints en el menor tiempo posible y de repe…	Entre 30 y 45 minutos	2-3 días	Sí	15 minutos	No			Charlar compañero sobre el partido	Nunca	Ajustes del partido.
2021-09-18 19:51:37	Sí	2003-07-20	Hombre	1.87	72	Plasencia	Regional/Autonómica	2	2020-2021	Categoría senior, Categorías inferiores	Entre 3 y 4 partidos/semana	4	Sí	No	Para mantener o desarrollar la resistencia aeróbica (natación, ciclismo, carrera, saltar a la comba, etc.), Para mantener o desarrollar la fuerza muscular (diferentes técnicas de fortalecimiento muscular con máquinas, con peso libre, con el propio peso corporal, con gomas elásticas, etc.)	Entre 15 y 30 minutos	2-3 días	No		Sí	Estiramientos y movilidad articular	No lesionarme		Durante el calentamiento inicial, Durante el descanso entre mitades
2021-09-18 19:52:06	Sí	2000-11-09	Mujer	158	44.7	Cáceres	Regional/Autonómica	Local (4 años), regional/autonómica (2 años), nacional (sin experiencia), internacional (sin experiencia)	2020-2021	Categoría senior, Categorías inferiores	Entre 5 y 6 partidos semana	Autonómica	Sí	Sí	Para mantener o desarrollar la resistencia aeróbica (natación, ciclismo, carrera, saltar a la comba, etc.), Para mantener o desarrollar la fuerza muscular (diferentes técnicas de fortalecimiento muscular con máquinas, con peso libre, con el propio peso corporal, con gomas elásticas, etc.), Para mantener o desarrollar la velocidad (capacidad de realizar sprints en el menor tiempo posible y de repe…	Entre 45 y 60 minutos	2-3 días	Sí	3-5 minutos	No			Para descansar más tiempo	Durante el calentamiento inicial, En el descanso entre primer y segundo cuarto, Durante el descanso entre mitades, En el descanso entre tercer y último cuarto, Al finalizar el partido
2021-09-18 19:52:13	Sí	1972-10-30	Hombre	173	73	Cáceres, Cáceres	Regional/Autonómica	12 años	2019-2020	Categoría senior, Categorías inferiores	Entre 3 y 4 partidos/semana	Grupo 3	Sí	No	Para mantener o desarrollar la resistencia aeróbica (natación, ciclismo, carrera, saltar a la comba, etc.)	Entre 45 y 60 minutos	2-3 días	Sí	5-10 minutos	Sí	Estiramientos y movilidad articular	Mantenerse activo		Durante el descanso entre mitades, Al finalizar el partido
2021-09-18 19:52:21	Sí	1990-09-06	Hombre	180	75	Villafranca de los Barros, Badajoz	Regional/Autonómica	7 años	2018-2019	Categoría senior, Categorías inferiores	Entre 5 y 6 partidos semana	Autonómica	No	No		Entre 15 y 30 minutos	2-3 días	No		No			Falta rutina	Durante el calentamiento inicial, Al finalizar el partido
2021-09-18 19:52:25	Sí	1993-05-06	Hombre	196	112	Mérida (Badajoz)	Local, Regional/Autonómica	Local y regional 8 años	2018-2019	Categoría senior, Categorías inferiores	Entre 6 y 7 partidos semana	Grupo 4	Sí	No	Para mantener o desarrollar la resistencia aeróbica (natación, ciclismo, carrera, saltar a la comba, etc.), Para mantener o desarrollar la fuerza muscular (diferentes técnicas de fortalecimiento muscular con máquinas, con peso libre, con el propio peso corporal, con gomas elásticas, etc.), Para mantener o desarrollar la velocidad (capacidad de realizar sprints en el menor tiempo posible y de repe…	Entre 30 y 45 minutos	2-3 días	Sí	5-10 minutos	No			Porque no lo había planteado así, desconocimientos o descanso.	Durante el calentamiento inicial, Al finalizar el partido
2021-09-18 19:52:31	Sí	1976-04-03	Mujer	167	57	Cáceres	Local	Local 2 años	2020-2021	Categoría senior	Entre 5 y 6 partidos semana	Autonómico	Sí	Sí	Para mantener o desarrollar la resistencia aeróbica (natación, ciclismo, carrera, saltar a la comba, etc.), Para mantener o desarrollar la fuerza muscular (diferentes técnicas de fortalecimiento muscular con máquinas, con peso libre, con el propio peso corporal, con gomas elásticas, etc.), Para mantener o desarrollar la velocidad (capacidad de realizar sprints en el menor tiempo posible y de repe…	Más de 60 minutos	2-3 días	Sí	3-5 minutos	No			Nunca lo había pensado	Al finalizar el partido
2021-09-18 19:53:00	Sí	1990-12-11	Hombre	177	81	Navalmoral de la Mata (Cáceres)	Regional/Autonómica	12	2019-2020	Categoría senior	Entre 4 y 5 partidos/semana	Grupo 3	Sí	No	Para mantener o desarrollar otras capacidades (coordinación, equilibrio, agilidad)	Entre 30 y 45 minutos	4-5 días	Sí	15	No	Correr a máxima velocidad (esprintar)			Durante el calentamiento inicial
2021-09-18 19:53:29	Sí	1995-07-30	Hombre	1.71	93	Don Benito, Badajoz	Regional/Autonómica	Local (8 años) regional/autonómico (8 años) nacional (sin experiencia), internacional (sin experiencia)	2018-2019	Categoría senior, Categorías inferiores	Entre 3 y 4 partidos/semana	Grupo 4	Sí	No	Para mantener o desarrollar la resistencia aeróbica (natación, ciclismo, carrera, saltar a la comba, etc.), Para mantener o desarrollar otras capacidades (coordinación, equilibrio, agilidad)	Entre 45 y 60 minutos	4-5 días	Sí	5-10 minutos	No			Dejadez	Durante el calentamiento inicial
2021-09-18 19:53:31	Sí	2000-12-27	Hombre	195	95.5	Provincia Badajoz	Regional/Autonómica	Local (5 años) Autonómica (3 años) Nacional e Internacional (Sin experiencia)	2018-2019	Categoría senior, Categorías inferiores	Entre 3 y 4 partidos/semana	Grupo 3	Sí	No	Para mantener o desarrollar la resistencia aeróbica (natación, ciclismo, carrera, saltar a la comba, etc.), Para mantener o desarrollar la fuerza muscular (diferentes técnicas de fortalecimiento muscular con máquinas, con peso libre, con el propio peso corporal, con gomas elásticas, etc.), Para mantener o desarrollar la velocidad (capacidad de realizar sprints en el menor tiempo posible y de repe…	Entre 45 y 60 minutos	2-3 días	Sí	15 minutos	No			Descansar y controlar que todo está en orden	Durante el calentamiento inicial, Al finalizar el partido
2021-09-18 19:53:43	Sí	1996-05-15	Hombre	176	80	Almendralejo,Badajoz	Regional/Autonómica	autonomica (11 años)	2018-2019	Categoría senior, Categorías inferiores	Entre 3 y 4 partidos/semana	Autonomica	No	No	Para mantener o desarrollar la fuerza muscular (diferentes técnicas de fortalecimiento muscular con máquinas, con peso libre, con el propio peso corporal, con gomas elásticas, etc.)	Entre 45 y 60 minutos	2-3 días	No		No			Permanecer en el vesturio durante el descanso	Durante el calentamiento inicial
2021-09-18 19:55:34	Sí	1992-02-13	Hombre	181	82	Oliva de la Frontera	Local, Regional/Autonómica	Local(15años) Regional (15 años)	2019-2020	Categoría senior, Categorías inferiores	Entre 3 y 4 partidos/semana	Diputación	Sí	No	Para mantener o desarrollar la resistencia aeróbica (natación, ciclismo, carrera, saltar a la comba, etc.), Para mantener o desarrollar la fuerza muscular (diferentes técnicas de fortalecimiento muscular con máquinas, con peso libre, con el propio peso corporal, con gomas elásticas, etc.)	Entre 45 y 60 minutos	4-5 días	No		No			Pensamiento de no necesidad de calentar.	Durante el calentamiento inicial
2021-09-18 19:55:39	Sí	1981-06-01	Hombre	176	75	Badajoz	Regional/Autonómica	22 años	2020-2021	Categoría senior, Categorías inferiores	Entre 4 y 5 partidos/semana	1a autonómica	Sí	No	Para mantener o desarrollar la resistencia aeróbica (natación, ciclismo, carrera, saltar a la comba, etc.), Para mantener o desarrollar la fuerza muscular (diferentes técnicas de fortalecimiento muscular con máquinas, con peso libre, con el propio peso corporal, con gomas elásticas, etc.), Para mantener o desarrollar la flexibilidad (ya sea con el propio cuerpo, ayuda de otra persona, o con eleme…	Entre 45 y 60 minutos	6-7 días	Sí	10 min	No	Trotar o correr, Correr a máxima velocidad (esprintar), Estiramientos y movilidad articular		Falta de tiempo	Durante el calentamiento inicial, Al finalizar el partido
2021-09-18 19:55:53	Sí	2002-06-09	Hombre	1.8	64	Don Benito, Badajoz	Local	Local (4 años), regional/autonómica (sin experiencia), nacional (sin experiencia), internacional (sin experiencia)	2020-2021	Categorías inferiores	Entre 2 y 3 partidos/semana	Grupo 4	Sí	No	Para mantener o desarrollar la resistencia aeróbica (natación, ciclismo, carrera, saltar a la comba, etc.), Para mantener o desarrollar otras capacidades (coordinación, equilibrio, agilidad)	Entre 45 y 60 minutos	2-3 días	No		No		Para poder estar en forma de nuevo, tras el parón en el descanso		Durante el calentamiento inicial
2021-09-18 19:57:29	Sí	1977-01-06	Hombre	190	86	huelva	Regional/Autonómica, Nacional	local (25) regional (20) nacional (6)	2019-2020	Categoría senior, Categorías inferiores	Entre 2 y 3 partidos/semana	local provincial y regional	Sí	No	Para mantener o desarrollar la resistencia aeróbica (natación, ciclismo, carrera, saltar a la comba, etc.), Para mantener o desarrollar la fuerza muscular (diferentes técnicas de fortalecimiento muscular con máquinas, con peso libre, con el propio peso corporal, con gomas elásticas, etc.), Para mantener o desarrollar la flexibilidad (ya sea con el propio cuerpo, ayuda de otra persona, o con eleme…	Entre 45 y 60 minutos	4-5 días	Sí	10 minutos	No			no lo veo necesario	Durante el calentamiento inicial, Al finalizar el partido
2021-09-18 19:57:40	Sí	1988-09-11	Hombre	178	87	Oliva de la Frontera	Local, Regional/Autonómica	Local-Autonómico (15 años)	2018-2019	Categorías inferiores	Entre 3 y 4 partidos/semana	Grupo 4	Sí	No	Para mantener o desarrollar la resistencia aeróbica (natación, ciclismo, carrera, saltar a la comba, etc.)	Entre 30 y 45 minutos	4-5 días	Sí	5 minutos	No	Trotar o correr, Ejercicio de fuerza (saltos, flexiones, etc.), Estiramientos y movilidad articular		No lo creía necesario	Durante el calentamiento inicial
2021-09-18 19:58:05	Sí	1992-04-18	Hombre	178	74	Badajoz	Local, Regional/Autonómica, Nacional	Local (5 años) regional (4 años) nacional(1 año)	2019-2020	Categoría senior	Entre 6 y 7 partidos semana	Primera FEXB	Sí	No	Para mantener o desarrollar la resistencia aeróbica (natación, ciclismo, carrera, saltar a la comba, etc.), Para mantener o desarrollar la fuerza muscular (diferentes técnicas de fortalecimiento muscular con máquinas, con peso libre, con el propio peso corporal, con gomas elásticas, etc.), Para mantener o desarrollar la velocidad (capacidad de realizar sprints en el menor tiempo posible y de repe…	Entre 45 y 60 minutos	4-5 días	Sí	10 minutos	No			No estar excesivamente cargado o cansado	Durante el calentamiento inicial, Al finalizar el partido
2021-09-18 20:08:12	Sí	1971-01-30	Hombre	180	84	ALMERIA	Local, Regional/Autonómica, Nacional	LOCAL9REGIONAL13 NACIONAL 10	2020-2021	Categoría senior	Entre 1 y 2 partidos/semana	Provincial	Sí	No	Para mantener o desarrollar la resistencia aeróbica (natación, ciclismo, carrera, saltar a la comba, etc.)	Entre 45 y 60 minutos	2-3 días	Sí	5 minutos	No			POr falta de tiempo y costumbre	Durante el calentamiento inicial
2021-09-18 20:46:57	Sí	1996-05-21	Hombre	188	90	Jerez de la frontera, Cádiz	Local, Regional/Autonómica	Local 6 años	2020-2021	Categoría senior, Categorías inferiores	Entre 4 y 5 partidos/semana	Provincial	Sí	No	Para mantener o desarrollar la resistencia aeróbica (natación, ciclismo, carrera, saltar a la comba, etc.), Para mantener o desarrollar la fuerza muscular (diferentes técnicas de fortalecimiento muscular con máquinas, con peso libre, con el propio peso corporal, con gomas elásticas, etc.), Para mantener o desarrollar la velocidad (capacidad de realizar sprints en el menor tiempo posible y de repe…	Más de 60 minutos	4-5 días	Sí	5 minutos	No			Hablo con los compañeros	Durante el calentamiento inicial
2021-09-19 23:52:10	Sí	1992-12-21	Mujer	170	69	Madrid, Madrid	Nacional	1 Escuela, 4 Autonómicos, 2 Primera Autonómica 3 Nacional	2019-2020	Categoría senior, Categorías inferiores	7 o más partidos/semana	Nacional, Autonómicos y liga municipal	Sí	Sí	Para mantener o desarrollar la resistencia aeróbica (natación, ciclismo, carrera, saltar a la comba, etc.), Para mantener o desarrollar la fuerza muscular (diferentes técnicas de fortalecimiento muscular con máquinas, con peso libre, con el propio peso corporal, con gomas elásticas, etc.)	Entre 45 y 60 minutos	4-5 días	Sí	10 minutos	No				Durante el calentamiento inicial, Durante el descanso entre mitades, Al finalizar el partido
2021-09-22 17:07:38	Sí	1993-02-18	Hombre	178	72	Valencia	Local, Regional/Autonómica, Nacional	En la comunidad valenciana se distribuye de manera diferente. En mi caso sería, 1 año escuela, 1 año zonal, 1 año autonómico, 1 año nacional, 3 años FEB y 3 años ACB.	2019-2020	Categoría senior	1 partido/semana	En la comunidad valenciana se distribuye de manera diferente. En mi caso sería, 1 año escuela, 1 año zonal, 1 año autonómico, 1 año nacional, 1 año grupo 2, 2 años grupo 1 y ,hasta el año señalado, 1 año ACB.	Sí	Sí	Para mantener o desarrollar la fuerza muscular (diferentes técnicas de fortalecimiento muscular con máquinas, con peso libre, con el propio peso corporal, con gomas elásticas, etc.), Para mantener o desarrollar la flexibilidad (ya sea con el propio cuerpo, ayuda de otra persona, o con elementos como toallas, gomas elásticas, foam roller, etc.), Para mantener o desarrollar otras capacidades (coord…	Entre 45 y 60 minutos	4-5 días	Sí	5 minutos en pista	Sí	Trotar o correr	Para activar mi cuerpo lo antes posible y que no sea de golpe al encuentro.		Durante el calentamiento inicial, Durante el descanso entre mitades	Realizo movilidad articular pero nunca estiramientos al uso.
2021-09-22 17:15:26	Sí	1996-06-21	Hombre	183	84	Murcia	Local, Regional/Autonómica, Nacional	Local (9 años) Regional/autonomica (9 años) nacional (6 años)	2018-2019	Categoría senior	Entre 1 y 2 partidos/semana	Leb oro, liga femenina 1 y leb plata	Sí	Sí	Para mantener o desarrollar la resistencia aeróbica (natación, ciclismo, carrera, saltar a la comba, etc.), Para mantener o desarrollar la fuerza muscular (diferentes técnicas de fortalecimiento muscular con máquinas, con peso libre, con el propio peso corporal, con gomas elásticas, etc.)	Más de 60 minutos	4-5 días	Sí	5/10 minutos	No			No lo creo necesario	Durante el calentamiento inicial
2021-09-22 17:17:44	Sí	1993-06-19	Hombre	1.87	80	Valencia	Nacional	Local 6 años, nacional 2 años	2020-2021	Categoría senior	Entre 5 y 6 partidos semana	Feb grupo 2	Sí	Sí	Para mantener o desarrollar la fuerza muscular (diferentes técnicas de fortalecimiento muscular con máquinas, con peso libre, con el propio peso corporal, con gomas elásticas, etc.), Para mantener o desarrollar la velocidad (capacidad de realizar sprints en el menor tiempo posible y de repetirlos el mayor número de veces)	Más de 60 minutos	4-5 días	Sí	10-12 minutos	No			No lo tengo x costumbre	Durante el calentamiento inicial, Al finalizar el partido
2021-09-22 17:20:22	Sí	1991-05-20	Hombre	172	70	Alicante	Local, Regional/Autonómica, Nacional	Local (11años) autonomica(9años) nacional (6años)	2019-2020	Categoría senior	Entre 1 y 2 partidos/semana	Grupo 1	Sí	Sí	Para mantener o desarrollar la fuerza muscular (diferentes técnicas de fortalecimiento muscular con máquinas, con peso libre, con el propio peso corporal, con gomas elásticas, etc.), Para mantener o desarrollar la velocidad (capacidad de realizar sprints en el menor tiempo posible y de repetirlos el mayor número de veces)	Entre 45 y 60 minutos	4-5 días	Sí	5minutos	Sí	Técnicas de manejo de la respiración (activación/relajación, conciencia)	Estar mental y físicamente activo tras 15 min de descanso		Durante el calentamiento inicial, Al finalizar el partido
2021-09-22 17:25:32	Sí	1994-09-25	Hombre	177 cm	72	Torrent, Valencia	Local, Regional/Autonómica	Locas (3 años), autonómica (5 años)	2018-2019	Categoría senior, Categorías inferiores	Entre 5 y 6 partidos semana	Cto 1°división españa	Sí	No	Para mantener o desarrollar la resistencia aeróbica (natación, ciclismo, carrera, saltar a la comba, etc.), Para mantener o desarrollar la fuerza muscular (diferentes técnicas de fortalecimiento muscular con máquinas, con peso libre, con el propio peso corporal, con gomas elásticas, etc.)	Más de 60 minutos	4-5 días	Sí	Entre 5 y 1p minutos	No			No hay tiempo suficiente para desactivarme	Durante el calentamiento inicial, Al finalizar el partido
2021-09-22 17:25:54	Sí	1991-05-27	Hombre	183	82	Las palmas de GC	Local, Regional/Autonómica, Nacional	Local (8 años) Autonómica (6 años) nacional (5 años) internacional(sin experiencia)	2018-2019	Categoría senior, Categorías inferiores	Entre 2 y 3 partidos/semana	Grupo 1 Feb, competiciones autonómicas y competiciones insulares en GC	Sí	No	Para mantener o desarrollar la resistencia aeróbica (natación, ciclismo, carrera, saltar a la comba, etc.), Para mantener o desarrollar la fuerza muscular (diferentes técnicas de fortalecimiento muscular con máquinas, con peso libre, con el propio peso corporal, con gomas elásticas, etc.), Para mantener o desarrollar la flexibilidad (ya sea con el propio cuerpo, ayuda de otra persona, o con eleme…	Entre 45 y 60 minutos	4-5 días	Sí	5-10 minutos	No			No entra dentro de mi rutina	Durante el calentamiento inicial
2021-09-22 17:30:52	Sí	1989-10-12	Hombre	180	76	Alicante	Nacional	Local 13 Autonómica 12 Nacional 6	2018-2019	Categoría senior, Categorías inferiores	Entre 2 y 3 partidos/semana	Grupo 2 FEB. EBA y LF2	Sí	No	Para mantener o desarrollar la resistencia aeróbica (natación, ciclismo, carrera, saltar a la comba, etc.), Para mantener o desarrollar la fuerza muscular (diferentes técnicas de fortalecimiento muscular con máquinas, con peso libre, con el propio peso corporal, con gomas elásticas, etc.), Para mantener o desarrollar la velocidad (capacidad de realizar sprints en el menor tiempo posible y de repe…	Más de 60 minutos	4-5 días	Sí	15-20 minutos	Sí	Ejercicio de fuerza (saltos, flexiones, etc.), Estiramientos y movilidad articular	Apenas hay tiempo, pero tras 8 minutos totalmente parado, el dar un par de saltos o algo de movilidad, me ayuda no solo en lo fisico, también y especialmente en activarme mentalmente		Durante el calentamiento inicial, Durante el descanso entre mitades, Al finalizar el partido
2021-09-22 17:32:13	Sí	1974-08-28	Hombre	180	81	Sada A Coruña	Local, Regional/Autonómica, Nacional, Internacional	Local 2, regional 4, nacional 22, Internacional 10	2018-2019	Categoría senior	Entre 1 y 2 partidos/semana	Acb, Euroliga, Eurocup	Sí	No	Para mantener o desarrollar la resistencia aeróbica (natación, ciclismo, carrera, saltar a la comba, etc.), Para mantener o desarrollar la fuerza muscular (diferentes técnicas de fortalecimiento muscular con máquinas, con peso libre, con el propio peso corporal, con gomas elásticas, etc.), Para mantener o desarrollar la flexibilidad (ya sea con el propio cuerpo, ayuda de otra persona, o con eleme…	Más de 60 minutos	4-5 días	Sí	Sobre 5 minutos	No			No suelo hacerlo por costumbre. Lo utilizo más de descanso que de activación	Durante el calentamiento inicial
2021-09-22 17:33:26	Sí	1989-02-07	Mujer	168	61	Borrassa, Girona	Local, Regional/Autonómica, Nacional, Internacional	Local (17 años) regional (10 años) nacional (7 años) internacional (2 años)	2018-2019	Categoría senior, Categorías inferiores	Entre 2 y 3 partidos/semana	Feb Grupo 1	Sí	No	Para mantener o desarrollar la resistencia aeróbica (natación, ciclismo, carrera, saltar a la comba, etc.), Para mantener o desarrollar la fuerza muscular (diferentes técnicas de fortalecimiento muscular con máquinas, con peso libre, con el propio peso corporal, con gomas elásticas, etc.), Para mantener o desarrollar la velocidad (capacidad de realizar sprints en el menor tiempo posible y de repe…	Más de 60 minutos	6-7 días	Sí	Más de 10 minutos	Sí	Trotar o correr, Técnicas de manejo de la respiración (activación/relajación, conciencia), Otras	Para volver al partido con el estado de activación optima, y de esta forma no perder efectividad en mis decisiones en el tercer cuarto.		Durante el calentamiento inicial, Al finalizar el partido		Thank you for paying attention to the physical conditioning of the referees.
2021-09-22 17:40:12	Sí	1995-10-31	Hombre	172	70	Ondara, Alicante	Nacional	Local 11 años, autonómica (11 años), nacional (2 años),internacional (sin experiencia)	2020-2021	Categoría senior	Entre 4 y 5 partidos/semana	Feb grupo 2, 1 división nacional, categorias inferiores	Sí	No	Para mantener o desarrollar la resistencia aeróbica (natación, ciclismo, carrera, saltar a la comba, etc.), Para mantener o desarrollar la fuerza muscular (diferentes técnicas de fortalecimiento muscular con máquinas, con peso libre, con el propio peso corporal, con gomas elásticas, etc.), Para mantener o desarrollar la velocidad (capacidad de realizar sprints en el menor tiempo posible y de repe…	Más de 60 minutos	4-5 días	Sí	10 minutos	No	Trotar o correr, Correr a máxima velocidad (esprintar), Estiramientos y movilidad articular, Ejercicios de coordinación y equilibrio			Durante el calentamiento inicial, Durante el descanso entre mitades
2021-09-22 17:41:46	Sí	1986-05-02	Hombre	181	77	Madrid	Internacional	Internacional 3, nacional 9	2020-2021	Categoría senior	1 partido/semana	Acb fiba	Sí	No	Para mantener o desarrollar la fuerza muscular (diferentes técnicas de fortalecimiento muscular con máquinas, con peso libre, con el propio peso corporal, con gomas elásticas, etc.)	Entre 45 y 60 minutos	2-3 días	No		No			Lo hago, pero sin rutina	Al finalizar el partido
2021-09-22 17:46:37	Sí	1983-12-25	Mujer	167	60.5	Salamanca	Regional/Autonómica, Nacional, Internacional	Regional (20 años) nacional (15 años) internacional (4 años)	2019-2020	Categoría senior	Entre 1 y 2 partidos/semana	ACB, Internacional, regional	Sí	Sí	Para mantener o desarrollar la resistencia aeróbica (natación, ciclismo, carrera, saltar a la comba, etc.), Para mantener o desarrollar la fuerza muscular (diferentes técnicas de fortalecimiento muscular con máquinas, con peso libre, con el propio peso corporal, con gomas elásticas, etc.), Para mantener o desarrollar la velocidad (capacidad de realizar sprints en el menor tiempo posible y de repe…	Más de 60 minutos	4-5 días	Sí	10 min	No			Nos entretenemos con el partido y lo q va ocurriendo	Al finalizar el partido
2021-09-22 17:52:58	Sí	1989-10-06	Hombre	175	70	Moncada, Valencia	Local, Regional/Autonómica, Nacional	Local (12 años) regional (11 años) nacional (9 años)	2020-2021	Categoría senior	1 partido/semana	Grupo 1	Sí	No	Para mantener o desarrollar la resistencia aeróbica (natación, ciclismo, carrera, saltar a la comba, etc.), Para mantener o desarrollar la fuerza muscular (diferentes técnicas de fortalecimiento muscular con máquinas, con peso libre, con el propio peso corporal, con gomas elásticas, etc.), Para mantener o desarrollar otras capacidades (coordinación, equilibrio, agilidad)	Entre 45 y 60 minutos	2-3 días	Sí	10 minutos	Sí	Estiramientos y movilidad articular			Durante el calentamiento inicial, Durante el descanso entre mitades, Al finalizar el partido
2021-09-22 17:58:20	Sí	1987-03-23	Hombre	178	72	Barcelona, Barcelona	Local, Regional/Autonómica, Nacional	Local (1), Autonomica (5), Nacional (13), internacional (sin experiencia)	2020-2021	Categoría senior	1 partido/semana	ACB	Sí	Sí	Para mantener o desarrollar la resistencia aeróbica (natación, ciclismo, carrera, saltar a la comba, etc.), Para mantener o desarrollar la fuerza muscular (diferentes técnicas de fortalecimiento muscular con máquinas, con peso libre, con el propio peso corporal, con gomas elásticas, etc.), Para mantener o desarrollar la velocidad (capacidad de realizar sprints en el menor tiempo posible y de repe…	Entre 45 y 60 minutos	2-3 días	Sí	15 minutos	No	Trotar o correr, Correr a máxima velocidad (esprintar), Ejercicio de fuerza (saltos, flexiones, etc.), Estiramientos y movilidad articular	-	Por la costumbre y/o timing, es complicado aplicar 100% siempre. A veces sí hago reactivación, pero otras muchas llegas con el tiempo justo, por tanto no es rutina.	Durante el calentamiento inicial	-	Good luck with the project!
2021-09-22 18:06:57	Sí	1978-07-17	Hombre	184	82	Denia Alicante,	Local, Regional/Autonómica, Nacional, Internacional	local (26 años), regional (22 años), nacional (19 años), internacional (8 años)	2018-2019	Categoría senior	Entre 1 y 2 partidos/semana	ACB, FIBA	Sí	Sí	Para mantener o desarrollar la resistencia aeróbica (natación, ciclismo, carrera, saltar a la comba, etc.), Para mantener o desarrollar la fuerza muscular (diferentes técnicas de fortalecimiento muscular con máquinas, con peso libre, con el propio peso corporal, con gomas elásticas, etc.), Para mantener o desarrollar la velocidad (capacidad de realizar sprints en el menor tiempo posible y de repe…	Más de 60 minutos	4-5 días	Sí	12 minutos	No			Por mal hábito	Durante el calentamiento inicial, Al finalizar el partido
2021-09-22 18:08:20	Sí	1983-11-21	Hombre	184	88	Madrid	Nacional	Local 6 - Regional/autonomica 5 - Nacional 9	2018-2019	Categoría senior	1 partido/semana	Liga Endesa	Sí	Sí	Para mantener o desarrollar la resistencia aeróbica (natación, ciclismo, carrera, saltar a la comba, etc.), Para mantener o desarrollar la fuerza muscular (diferentes técnicas de fortalecimiento muscular con máquinas, con peso libre, con el propio peso corporal, con gomas elásticas, etc.), Para mantener o desarrollar la flexibilidad (ya sea con el propio cuerpo, ayuda de otra persona, o con eleme…	Entre 45 y 60 minutos	2-3 días	Sí	2 minutos	No				Durante el calentamiento inicial
2021-09-22 18:21:59	Sí	1992-08-09	Hombre	180	72	Madrid	Nacional	Local (1 año) regional/autonómica (4 años) nacional (7 años)	2019-2020	Categoría senior	1 partido/semana	ACB	Sí	No	Para mantener o desarrollar la resistencia aeróbica (natación, ciclismo, carrera, saltar a la comba, etc.), Para mantener o desarrollar la fuerza muscular (diferentes técnicas de fortalecimiento muscular con máquinas, con peso libre, con el propio peso corporal, con gomas elásticas, etc.), Para mantener o desarrollar otras capacidades (coordinación, equilibrio, agilidad)	Entre 45 y 60 minutos	4-5 días	Sí	5-10 minutos	Sí	Estiramientos y movilidad articular	Por un motivo físico y psicológico antes de reanudar el partido.		Durante el calentamiento inicial, Durante el descanso entre mitades, Al finalizar el partido
2021-09-22 18:28:22	Sí	1968-01-21	Hombre	186	81	León	Nacional, Internacional	Nacional(30 años) Ínternacional (18años)	2019-2020	Categoría senior	1 partido/semana	Acb	Sí	No	Para mantener o desarrollar la resistencia aeróbica (natación, ciclismo, carrera, saltar a la comba, etc.), Para mantener o desarrollar la fuerza muscular (diferentes técnicas de fortalecimiento muscular con máquinas, con peso libre, con el propio peso corporal, con gomas elásticas, etc.), Para mantener o desarrollar la velocidad (capacidad de realizar sprints en el menor tiempo posible y de repe…	Entre 45 y 60 minutos	2-3 días	Sí	10-15 minutos	Sí	Trotar o correr, Estiramientos y movilidad articular	Mantener el tono muscular		Durante el calentamiento inicial, En el descanso entre primer y segundo cuarto, Al finalizar el partido
2021-09-22 18:40:52	Sí	1990-04-25	Hombre	185	83	Zaragoza	Local, Regional/Autonómica, Nacional	LOCAL (12 AÑOS) REGIONAL (10 AÑOS) NACIONAL (6 AÑOS)	2019-2020	Categoría senior	1 partido/semana	ACB	Sí	No	Para mantener o desarrollar la resistencia aeróbica (natación, ciclismo, carrera, saltar a la comba, etc.), Para mantener o desarrollar la fuerza muscular (diferentes técnicas de fortalecimiento muscular con máquinas, con peso libre, con el propio peso corporal, con gomas elásticas, etc.), Para mantener o desarrollar la velocidad (capacidad de realizar sprints en el menor tiempo posible y de repe…	Entre 30 y 45 minutos	2-3 días	No		No			No tengo una guía o una rutina para realizar que sea beneficiosa para mi actividad.	Durante el calentamiento inicial, Al finalizar el partido
2021-09-22 18:50:21	Sí	1995-07-06	Hombre	185	80	Cádiz, Cádiz	Local, Regional/Autonómica, Nacional, Internacional	Local (11 años), Autonómica (7 años), Nacional (6 años) e Internacional (Recién obtenida licencia)	2019-2020	Categoría senior	1 partido/semana	ACB	Sí	No	Para mantener o desarrollar la resistencia aeróbica (natación, ciclismo, carrera, saltar a la comba, etc.), Para mantener o desarrollar la fuerza muscular (diferentes técnicas de fortalecimiento muscular con máquinas, con peso libre, con el propio peso corporal, con gomas elásticas, etc.)	Entre 45 y 60 minutos	4-5 días	Sí	Entre 20-30 minutos aproximadamente. Dividido en tiempo dentro del vestuario (ejercicios de activación con goma y propio peso), y 20 minutos antes del partido (activación cardiovascular con carreras y desplazamientos).	No			Falta de un momento concreto para la activación. Normalmente, en los 10 minutos de vestuario se toma un descanso y se habla del partido, posteriormente se sale a pista quedando 5 minutos, donde no se suele hacer nada, pero soy partidario de que deberíamos hacer una reactivación para mayores garantías.	Durante el calentamiento inicial
2021-09-22 18:50:41	Sí	1991-08-29	Hombre	192	82	Alcalá de Henares, Madrid	Nacional	local (1 años), regional/autonómica (8 años), nacional (6 años), internacional (sin experiencia)	2019-2020	Categoría senior	1 partido/semana	Liga Endesa	Sí	No	Para mantener o desarrollar la resistencia aeróbica (natación, ciclismo, carrera, saltar a la comba, etc.), Para mantener o desarrollar la fuerza muscular (diferentes técnicas de fortalecimiento muscular con máquinas, con peso libre, con el propio peso corporal, con gomas elásticas, etc.), Para mantener o desarrollar la velocidad (capacidad de realizar sprints en el menor tiempo posible y de repe…	Entre 45 y 60 minutos	4-5 días	Sí	5 minutos	Sí	Trotar o correr, Técnicas de manejo de la respiración (activación/relajación, conciencia), Otras	Para no empezar frío el tercer cuarto y preparado para la actividad física, al igual que lo hacen los jugadores.		Al finalizar el partido
2021-09-22 18:59:43	Sí	1998-12-10	Hombre	163	66	Picanya (Valencia)	Local, Regional/Autonómica	Local (7 años) autonómica (2 años)	2020-2021	Categoría senior, Categorías inferiores	Entre 5 y 6 partidos semana	Nacional, Autonómica de todas las categorías, Provincial de todas las categorías y escolares de todas las categorias	Sí	Sí	Para mantener o desarrollar la fuerza muscular (diferentes técnicas de fortalecimiento muscular con máquinas, con peso libre, con el propio peso corporal, con gomas elásticas, etc.)	Más de 60 minutos	4-5 días	No		No			Mala costumbre	Al finalizar el partido
2021-09-22 19:12:21	Sí	1994-12-01	Hombre	194	92	L'Hospitalet de Llobregat	Nacional	Local (2 años), autonómica (3 años), nacional (5 años)	2019-2020	Categoría senior	Entre 1 y 2 partidos/semana	Grupo 1 FEB	Sí	No	Para mantener o desarrollar la resistencia aeróbica (natación, ciclismo, carrera, saltar a la comba, etc.), Para mantener o desarrollar la fuerza muscular (diferentes técnicas de fortalecimiento muscular con máquinas, con peso libre, con el propio peso corporal, con gomas elásticas, etc.)	Entre 45 y 60 minutos	2-3 días	Sí	5 minutos	No			Falta de costumbre	Durante el calentamiento inicial
2021-09-22 19:33:03	Sí	1988-12-08	Hombre	189	95	Valencia	Local, Regional/Autonómica, Nacional	Local (14 años), regional/autonómica (13 años), nacional (11 años)	2019-2020	Categoría senior, Categorías inferiores	Entre 1 y 2 partidos/semana	Grupo 1	Sí	Sí	Para mantener o desarrollar la resistencia aeróbica (natación, ciclismo, carrera, saltar a la comba, etc.), Para mantener o desarrollar la fuerza muscular (diferentes técnicas de fortalecimiento muscular con máquinas, con peso libre, con el propio peso corporal, con gomas elásticas, etc.), Para mantener o desarrollar la flexibilidad (ya sea con el propio cuerpo, ayuda de otra persona, o con eleme…	Entre 45 y 60 minutos	2-3 días	Sí	10 minutos	Sí	Estiramientos y movilidad articular, Técnicas de manejo de la respiración (activación/relajación, conciencia)	15 minutos de parón es mucho para entrar caliente si no		Durante el calentamiento inicial, Durante el descanso entre mitades, Al finalizar el partido
2021-09-22 19:33:50	Sí	1980-11-09	Hombre	179	78	León	Local, Regional/Autonómica, Nacional	local(1), regional/autonómica(20), internacional (sin experiencia)	2020-2021	Categoría senior	1 partido/semana	ACB	Sí	No	Para mantener o desarrollar la resistencia aeróbica (natación, ciclismo, carrera, saltar a la comba, etc.)	Entre 30 y 45 minutos	4-5 días	Sí	10-15 minutos	No			Pues nunca lo he hecho y por lo que estoy sospechando desde que leí la pregunta, quizás debería.......	Durante el calentamiento inicial, Al finalizar el partido
2021-09-22 19:41:05	Sí	1975-05-09	Hombre	180	80	San Sebastián	Nacional	20	2020-2021	Categoría senior	1 partido/semana	ACB	Sí	Sí	Para mantener o desarrollar la resistencia aeróbica (natación, ciclismo, carrera, saltar a la comba, etc.)	Entre 45 y 60 minutos	4-5 días	Sí	10	No			NSNC	Al finalizar el partido
2021-09-22 19:46:28	Sí	1972-08-01	Hombre	180	82	Castellar del Valles Barcelona	Nacional, Internacional	21 años nacional 10 internacional	2020-2021	Categoría senior	1 partido/semana	ACB	Sí	No	Para mantener o desarrollar la resistencia aeróbica (natación, ciclismo, carrera, saltar a la comba, etc.), Para mantener o desarrollar la velocidad (capacidad de realizar sprints en el menor tiempo posible y de repetirlos el mayor número de veces)	Entre 45 y 60 minutos	2-3 días	Sí	7 minutos	Sí	Estiramientos y movilidad articular	Rutina		Durante el calentamiento inicial, En el descanso entre primer y segundo cuarto
2021-09-22 20:57:38	Sí	1980-10-31	Hombre	182	82	Murcia	Internacional	6 años	2018-2019	Categoría senior	Entre 1 y 2 partidos/semana	2018-2019 ACB y FIBA	Sí	Sí	Para mantener o desarrollar la fuerza muscular (diferentes técnicas de fortalecimiento muscular con máquinas, con peso libre, con el propio peso corporal, con gomas elásticas, etc.), Para mantener o desarrollar la velocidad (capacidad de realizar sprints en el menor tiempo posible y de repetirlos el mayor número de veces), Para mantener o desarrollar la flexibilidad (ya sea con el propio cuerpo, …	Más de 60 minutos	2-3 días	Sí	5-10 minutos	No				Durante el calentamiento inicial
2021-09-22 20:59:00	Sí	1995-10-13	Hombre	194	79	Madrid, Madrid	Nacional	Local/Autonomica (6), Nacional (4)	2019-2020	Categoría senior	Entre 1 y 2 partidos/semana	Grupo 1	Sí	No	Para mantener o desarrollar la resistencia aeróbica (natación, ciclismo, carrera, saltar a la comba, etc.), Para mantener o desarrollar la fuerza muscular (diferentes técnicas de fortalecimiento muscular con máquinas, con peso libre, con el propio peso corporal, con gomas elásticas, etc.)	Entre 45 y 60 minutos	2-3 días	Sí	Calentar a partir de que queden 14 minutos hasta la presentación. Cuando termina esta, hacer sprints para acelerarme	No			Suelo utilizarlo para comentar cosas a trabajar o hablar con los compañeros	Durante el calentamiento inicial
2021-09-22 21:53:54	Sí	1975-10-01	Hombre	179	77	Ciudad Real	Internacional	Internacional 17	2019-2020	Categoría senior	Entre 2 y 3 partidos/semana	ACB	Sí	Sí	Para mantener o desarrollar la resistencia aeróbica (natación, ciclismo, carrera, saltar a la comba, etc.), Para mantener o desarrollar la fuerza muscular (diferentes técnicas de fortalecimiento muscular con máquinas, con peso libre, con el propio peso corporal, con gomas elásticas, etc.), Para mantener o desarrollar la velocidad (capacidad de realizar sprints en el menor tiempo posible y de repe…	Entre 45 y 60 minutos	2-3 días	Sí	7-8’	No			No habito	Durante el calentamiento inicial, Durante el descanso entre mitades, Al finalizar el partido
2021-09-22 22:02:12	Sí	1997-05-02	Hombre	176	80	Berriozar,Navarra	Local, Regional/Autonómica	Regional(2 años)	2020-2021	Categorías inferiores	Entre 3 y 4 partidos/semana	Categoría autonómica	Sí	Sí	Para mantener o desarrollar la resistencia aeróbica (natación, ciclismo, carrera, saltar a la comba, etc.), Para mantener o desarrollar la fuerza muscular (diferentes técnicas de fortalecimiento muscular con máquinas, con peso libre, con el propio peso corporal, con gomas elásticas, etc.), Para mantener o desarrollar la velocidad (capacidad de realizar sprints en el menor tiempo posible y de repe…	Más de 60 minutos	2-3 días	Sí	10 minutos	No			Entiendo que el descanso no es el suficiente como para que el cuerpo llegue a un estado de relajación	Durante el calentamiento inicial
2021-09-22 23:38:31	Sí	1995-06-09	Hombre	178	73	Avilés, Asturias	Local, Regional/Autonómica, Nacional	Local (3 años), Autonómica (1), Nacional (8), internacional (sin experiencia	2020-2021	Categoría senior	1 partido/semana	ACB	Sí	Sí	Para mantener o desarrollar la resistencia aeróbica (natación, ciclismo, carrera, saltar a la comba, etc.), Para mantener o desarrollar la fuerza muscular (diferentes técnicas de fortalecimiento muscular con máquinas, con peso libre, con el propio peso corporal, con gomas elásticas, etc.)	Entre 45 y 60 minutos	2-3 días	Sí	Carrera progresiva (de trote a unos sprint) 3-4 minutos + movilidad articula r2-3 minutos	No	Estiramientos y movilidad articular	Para reactivar el cuerpo para la actividad y no entrar frio después de un descanso de 15 minutos.		Durante el calentamiento inicial, Durante el descanso entre mitades	Para activación
2021-09-23 06:05:23	Sí	1972-02-27	Hombre	182	77	Las Palmas	Nacional, Internacional	Nacional (26 años) Internacional (14 años)	2019-2020	Categoría senior	Entre 1 y 2 partidos/semana	ACB	Sí	No	Para mantener o desarrollar la resistencia aeróbica (natación, ciclismo, carrera, saltar a la comba, etc.), Para mantener o desarrollar la fuerza muscular (diferentes técnicas de fortalecimiento muscular con máquinas, con peso libre, con el propio peso corporal, con gomas elásticas, etc.), Para mantener o desarrollar la velocidad (capacidad de realizar sprints en el menor tiempo posible y de repe…	Más de 60 minutos	4-5 días	Sí	10-15 minutos	No			No veo necesario, prefiero dialogar sobre el partido con los compañeros.	Durante el calentamiento inicial, Al finalizar el partido
2021-09-23 10:31:11	Sí	1969-11-27	Hombre	182	83	Bilbao	Nacional, Internacional	Nacional (30 años) Internacional (18)	2019-2020	Categoría senior	Entre 1 y 2 partidos/semana	ACB - Euroliga	Sí	No	Para mantener o desarrollar la resistencia aeróbica (natación, ciclismo, carrera, saltar a la comba, etc.), Para mantener o desarrollar la fuerza muscular (diferentes técnicas de fortalecimiento muscular con máquinas, con peso libre, con el propio peso corporal, con gomas elásticas, etc.), Para mantener o desarrollar la velocidad (capacidad de realizar sprints en el menor tiempo posible y de repe…	Más de 60 minutos	2-3 días	Sí	5 minutos	No			Hábitos	Durante el calentamiento inicial
2021-09-23 10:37:29	Sí	1976-08-15	Hombre	183	81	Zaragoza	Nacional, Internacional	21 años nacional y 10 años internacional	2019-2020	Categoría senior	Entre 1 y 2 partidos/semana	ACB - EUROLIGA - EUROCUP	Sí	No	Para mantener o desarrollar la resistencia aeróbica (natación, ciclismo, carrera, saltar a la comba, etc.), Para mantener o desarrollar la fuerza muscular (diferentes técnicas de fortalecimiento muscular con máquinas, con peso libre, con el propio peso corporal, con gomas elásticas, etc.), Para mantener o desarrollar otras capacidades (coordinación, equilibrio, agilidad)	Entre 45 y 60 minutos	4-5 días	Sí	25-30 min	No			Prefiero hacer una “vuelta a la calma” y los 5-7 min que tengo en el vestuario, compartir sensaciones con los compañeros	Durante el calentamiento inicial, Al finalizar el partido
2021-09-23 11:01:44	Sí	1988-06-14	Hombre	185	93	Salamanca	Nacional	2, 2,12, sin experiencia	2018-2019	Categoría senior	Entre 1 y 2 partidos/semana	FEB, grupo 1	Sí	No	Para mantener o desarrollar la fuerza muscular (diferentes técnicas de fortalecimiento muscular con máquinas, con peso libre, con el propio peso corporal, con gomas elásticas, etc.)	Entre 45 y 60 minutos	4-5 días	Sí	10-15 minutos	No			Aún sabiendo que es útil, normalmente lo uso más para descansar	Nunca, Durante el calentamiento inicial
2021-09-23 12:09:45	Sí	1984-01-16	Hombre	192	98	Alcalá de Henares, Madrid	Regional/Autonómica, Nacional	Regional (7 años) y Nacional (13 años)	2018-2019	Categoría senior	1 partido/semana	ACB	Sí	No	Para mantener o desarrollar la resistencia aeróbica (natación, ciclismo, carrera, saltar a la comba, etc.), Para mantener o desarrollar la fuerza muscular (diferentes técnicas de fortalecimiento muscular con máquinas, con peso libre, con el propio peso corporal, con gomas elásticas, etc.), Para mantener o desarrollar la flexibilidad (ya sea con el propio cuerpo, ayuda de otra persona, o con eleme…	Más de 60 minutos	2-3 días	Sí	8 minutos de cardio, 6 minutos de flexibilidad	No			No lo veo necesario hasta el momento	Durante el calentamiento inicial, Al finalizar el partido		Wish the study goes well
2021-09-23 13:10:55	Sí	2001-01-13	Hombre	176	67	Granada	Local	local (2 años)	2020-2021	Categorías inferiores	Entre 4 y 5 partidos/semana	Provincial	Sí	No	Para mantener o desarrollar la fuerza muscular (diferentes técnicas de fortalecimiento muscular con máquinas, con peso libre, con el propio peso corporal, con gomas elásticas, etc.)	Más de 60 minutos	4-5 días	Sí	10 minutos	No			Descanso y poco tiempo	Durante el calentamiento inicial, Durante el descanso entre mitades, Al finalizar el partido
2021-09-23 13:15:37	Sí	2001-12-15	Hombre	175	75	Caniles Granada	Local	Local 2 años	2020-2021	Categorías inferiores	Entre 3 y 4 partidos/semana	Provincial	Sí	No	Para mantener o desarrollar la resistencia aeróbica (natación, ciclismo, carrera, saltar a la comba, etc.), Para mantener o desarrollar la fuerza muscular (diferentes técnicas de fortalecimiento muscular con máquinas, con peso libre, con el propio peso corporal, con gomas elásticas, etc.), Para mantener o desarrollar la velocidad (capacidad de realizar sprints en el menor tiempo posible y de repe…	Entre 45 y 60 minutos	4-5 días	Sí	3 minutos	No	Trotar o correr, Correr a máxima velocidad (esprintar)		No lo he hecho nunca	Nunca	No los he hecho ni se cómo hacerlos para no sufrir daño
2021-09-25 12:13:36	Sí	1991-03-07	Hombre	187	87	Huelva	Local	10 años	2019-2020	Categoría senior	Entre 3 y 4 partidos/semana	Provincial	Sí	No	Para mantener o desarrollar la resistencia aeróbica (natación, ciclismo, carrera, saltar a la comba, etc.), Para mantener o desarrollar la fuerza muscular (diferentes técnicas de fortalecimiento muscular con máquinas, con peso libre, con el propio peso corporal, con gomas elásticas, etc.)	Más de 60 minutos	4-5 días	No		No			No lo veo necesario	Durante el calentamiento inicial
2021-09-25 12:14:47	Sí	2002-02-11	Hombre	190	76	Huelva	Local	3 años	2020-2021	Categorías inferiores	Entre 1 y 2 partidos/semana	Junior, Cadete, Infantil, Minibasket y Premini	Sí	No	Para mantener o desarrollar la fuerza muscular (diferentes técnicas de fortalecimiento muscular con máquinas, con peso libre, con el propio peso corporal, con gomas elásticas, etc.), Para mantener o desarrollar la velocidad (capacidad de realizar sprints en el menor tiempo posible y de repetirlos el mayor número de veces)	Más de 60 minutos	4-5 días	No		No			No lo tengo en consideración	Durante el calentamiento inicial
2021-09-25 12:17:54	Sí	2003-11-24	Hombre	175	72	Huelva	Local	Local (4 años), regional/autonómica (sin experiencia), nacional (sin experiencia), internacional (sin experiencia)	2019-2020	Categoría senior	Entre 2 y 3 partidos/semana	Provincial	Sí	No	Para mantener o desarrollar la resistencia aeróbica (natación, ciclismo, carrera, saltar a la comba, etc.)	Más de 60 minutos	4-5 días	Sí	5 minutos	No			Siento que ya estoy en la dinámica del partido y utilizo la mitad como descanso.	Durante el calentamiento inicial
2021-09-25 12:18:26	Sí	1998-03-25	Mujer	170	68	Huelva	Local, Regional/Autonómica	Local 5 años autonómico 1	2018-2019	Categoría senior, Categorías inferiores	Entre 4 y 5 partidos/semana	Provincial	Sí	Sí	Para mantener o desarrollar la fuerza muscular (diferentes técnicas de fortalecimiento muscular con máquinas, con peso libre, con el propio peso corporal, con gomas elásticas, etc.), Para mantener o desarrollar la velocidad (capacidad de realizar sprints en el menor tiempo posible y de repetirlos el mayor número de veces), Para mantener o desarrollar la flexibilidad (ya sea con el propio cuerpo, …	Entre 45 y 60 minutos	4-5 días	Sí	10-15min	Sí	Estiramientos y movilidad articular, Otras	Pues principalmente realizo movilidad y algo de estiramientos		Durante el calentamiento inicial, Durante el descanso entre mitades, Al finalizar el partido
2021-09-25 12:22:48	Sí	1992-10-07	Hombre	190	101	Huelva	Local	Local(4 años)	2019-2020	Categorías inferiores	Entre 2 y 3 partidos/semana	Grupo 2	No	No	Para mantener o desarrollar la resistencia aeróbica (natación, ciclismo, carrera, saltar a la comba, etc.)	Entre 45 y 60 minutos	1 día	Sí	15 minutos	No			Actividad laboral	Durante el calentamiento inicial
2021-09-25 12:23:36	Sí	1996-10-28	Hombre	1.99	77	Paterna del Campo, Huelva	Local	1	2019-2020	Categorías inferiores	1 partido/semana	Minibasket, infantil	Sí	No	Para mantener o desarrollar la resistencia aeróbica (natación, ciclismo, carrera, saltar a la comba, etc.), Para mantener o desarrollar la fuerza muscular (diferentes técnicas de fortalecimiento muscular con máquinas, con peso libre, con el propio peso corporal, con gomas elásticas, etc.), Para mantener o desarrollar otras capacidades (coordinación, equilibrio, agilidad)	Entre 45 y 60 minutos	6-7 días	Sí	10	No			No necesario	Durante el calentamiento inicial
2021-09-25 12:24:07	Sí	1969-02-06	Hombre	165	63	Huelva	Local	1	2020-2021	Categorías inferiores	1 partido/semana	Provincial	Sí	No	Para mantener o desarrollar la resistencia aeróbica (natación, ciclismo, carrera, saltar a la comba, etc.), Para mantener o desarrollar la velocidad (capacidad de realizar sprints en el menor tiempo posible y de repetirlos el mayor número de veces), Para mantener o desarrollar la flexibilidad (ya sea con el propio cuerpo, ayuda de otra persona, o con elementos como toallas, gomas elásticas, foam …	Entre 30 y 45 minutos	2-3 días	Sí	10 minutos	Sí	Trotar o correr, Estiramientos y movilidad articular	Mejorar concentración. Activarse físicamente		Durante el calentamiento inicial, Durante el descanso entre mitades, Al finalizar el partido
2021-09-25 12:28:37	Sí	1994-01-11	Mujer	166	63	Huelva	Local, Nacional	Local 8 años. Nacional 1 año	2019-2020	Categoría senior	Entre 3 y 4 partidos/semana	Provincial	Sí	No	Para mantener o desarrollar la resistencia aeróbica (natación, ciclismo, carrera, saltar a la comba, etc.), Para mantener o desarrollar la fuerza muscular (diferentes técnicas de fortalecimiento muscular con máquinas, con peso libre, con el propio peso corporal, con gomas elásticas, etc.)	Más de 60 minutos	2-3 días	Sí	5-10min	No				Durante el calentamiento inicial, Al finalizar el partido
2021-09-25 13:25:24	Sí	2004-01-14	Hombre	181	72.1	Huelva, Huelva	Local	Local (4 años)	2020-2021	Categoría senior	Entre 3 y 4 partidos/semana	Categoría provincial (Senior)	Sí	No	Para mantener o desarrollar la resistencia aeróbica (natación, ciclismo, carrera, saltar a la comba, etc.), Para mantener o desarrollar la fuerza muscular (diferentes técnicas de fortalecimiento muscular con máquinas, con peso libre, con el propio peso corporal, con gomas elásticas, etc.), Para mantener o desarrollar la velocidad (capacidad de realizar sprints en el menor tiempo posible y de repe…	Más de 60 minutos	6-7 días	Sí	5 minutos aprox.	Sí	Estiramientos y movilidad articular	Para evitar lesiones, tirones...		Durante el calentamiento inicial, Durante el descanso entre mitades, Al finalizar el partido
2021-09-25 13:29:55	Sí	2003-03-31	Hombre	1.67	53	Palos de la Frontera	Local	Local (5 años), regional/autonómica (sin experiencia ), nacional (sin experiencia), internacional (sin experiencia)	2020-2021	Categoría senior, Categorías inferiores	Entre 2 y 3 partidos/semana	Todas en las provinciales.	Sí	No	Para mantener o desarrollar la fuerza muscular (diferentes técnicas de fortalecimiento muscular con máquinas, con peso libre, con el propio peso corporal, con gomas elásticas, etc.), Para mantener o desarrollar la velocidad (capacidad de realizar sprints en el menor tiempo posible y de repetirlos el mayor número de veces)	Entre 30 y 45 minutos	4-5 días	Sí	5min	Sí	Técnicas de manejo de la respiración (activación/relajación, conciencia)	Enfriamiento		Durante el calentamiento inicial
2021-09-25 13:32:19	Sí	1997-06-16	Hombre	1.75	83	Trigueros	Local	Local (9años)	2021-2022	Categorías inferiores	Entre 1 y 2 partidos/semana	FAB, 2021-2022	Sí	No	Para mantener o desarrollar la resistencia aeróbica (natación, ciclismo, carrera, saltar a la comba, etc.), Para mantener o desarrollar la fuerza muscular (diferentes técnicas de fortalecimiento muscular con máquinas, con peso libre, con el propio peso corporal, con gomas elásticas, etc.)	Más de 60 minutos	2-3 días	Sí	10 min	Sí	Trotar o correr, Estiramientos y movilidad articular	Para que no se produzca un cambi9 significativo		Durante el calentamiento inicial, Durante el descanso entre mitades
2021-09-25 15:45:40	Sí	2000-07-19	Hombre	186	79	Jaén	Local	Local 3 años	2018-2019	Categorías inferiores	Entre 2 y 3 partidos/semana	Provincial	Sí	No	Para mantener o desarrollar la fuerza muscular (diferentes técnicas de fortalecimiento muscular con máquinas, con peso libre, con el propio peso corporal, con gomas elásticas, etc.)	Más de 60 minutos	4-5 días	No		No				Nunca
2021-09-25 15:48:52	Sí	1976-08-27	Hombre	173	77	Andújar (Jaén)	Regional/Autonómica	Regional/Autonómica (30 años)	2019-2020	Categoría senior, Categorías inferiores	Entre 5 y 6 partidos semana	Provincial	Sí	No	Para mantener o desarrollar la resistencia aeróbica (natación, ciclismo, carrera, saltar a la comba, etc.), Para mantener o desarrollar la fuerza muscular (diferentes técnicas de fortalecimiento muscular con máquinas, con peso libre, con el propio peso corporal, con gomas elásticas, etc.)	Entre 45 y 60 minutos	4-5 días	Sí	10 minutos	No			Costumbre, mala costumbre.	Durante el calentamiento inicial, Al finalizar el partido
2021-09-25 15:50:39	Sí	1994-03-31	Mujer	172	67	Linares, Jaén	Local, Regional/Autonómica, Nacional	Local (4 años) autonómica (3 años) nacional (2 años)	2019-2020	Categoría senior	1 partido/semana	Feb grupo 1	Sí	No	Para mantener o desarrollar la resistencia aeróbica (natación, ciclismo, carrera, saltar a la comba, etc.), Para mantener o desarrollar la fuerza muscular (diferentes técnicas de fortalecimiento muscular con máquinas, con peso libre, con el propio peso corporal, con gomas elásticas, etc.)	Entre 45 y 60 minutos	4-5 días	Sí	9 minutos	No			Aprovecho los descansos para descansar, no se me había ocurrido reactivarme durante los descansos	Durante el calentamiento inicial, Al finalizar el partido
2021-09-25 18:57:54	Sí	2004-02-16	Hombre	177	63	Huelva	Local	Local (2 años)	2020-2021	Categorías inferiores	1 partido/semana	Minibasket, junior	Sí	No	Para mantener o desarrollar la resistencia aeróbica (natación, ciclismo, carrera, saltar a la comba, etc.), Para mantener o desarrollar la fuerza muscular (diferentes técnicas de fortalecimiento muscular con máquinas, con peso libre, con el propio peso corporal, con gomas elásticas, etc.), Para mantener o desarrollar otras capacidades (coordinación, equilibrio, agilidad)	Más de 60 minutos	2-3 días	No		No				Durante el calentamiento inicial
2021-09-25 20:44:06	Sí	1989-04-06	Mujer	180	82	Huelva	Local	Local 13 años	2019-2020	Categoría senior, Categorías inferiores	Entre 3 y 4 partidos/semana	Provinciales	Sí	No	Para mantener o desarrollar la fuerza muscular (diferentes técnicas de fortalecimiento muscular con máquinas, con peso libre, con el propio peso corporal, con gomas elásticas, etc.), Para mantener o desarrollar la velocidad (capacidad de realizar sprints en el menor tiempo posible y de repetirlos el mayor número de veces), Para mantener o desarrollar la flexibilidad (ya sea con el propio cuerpo, …	Entre 30 y 45 minutos	2-3 días	Sí	5 min	Sí	Estiramientos y movilidad articular, Ejercicios de coordinación y equilibrio, Técnicas de manejo de la respiración (activación/relajación, conciencia)	Concentración, retomar la activación muscular		Durante el calentamiento inicial, Durante el descanso entre mitades
2021-09-26 12:52:42	Sí	1998-10-20	Hombre	190	86	Huelva	Local	Local (1 año)	2020-2021	Categorías inferiores	1 partido/semana	Categorías provinciales	Sí	No	Para mantener o desarrollar la resistencia aeróbica (natación, ciclismo, carrera, saltar a la comba, etc.), Para mantener o desarrollar la fuerza muscular (diferentes técnicas de fortalecimiento muscular con máquinas, con peso libre, con el propio peso corporal, con gomas elásticas, etc.), Para mantener o desarrollar la velocidad (capacidad de realizar sprints en el menor tiempo posible y de repe…	Más de 60 minutos	4-5 días	No		No				Durante el calentamiento inicial
2021-09-27 10:22:23	Sí	1986-02-05	Hombre	194	96	Huelva	Local	local (16 años)	2019-2020	Categoría senior	Entre 2 y 3 partidos/semana	Categoría provincial	Sí	No	Para mantener o desarrollar la resistencia aeróbica (natación, ciclismo, carrera, saltar a la comba, etc.), Para mantener o desarrollar la fuerza muscular (diferentes técnicas de fortalecimiento muscular con máquinas, con peso libre, con el propio peso corporal, con gomas elásticas, etc.)	Más de 60 minutos	4-5 días	Sí	10-15 minutos	No	Trotar o correr, Estiramientos y movilidad articular		me dedico a descansar y hablar de cosas del partido	Durante el calentamiento inicial
2021-09-28 12:35:05	Sí	1998-09-16	Hombre	185	90	Málaga	Local	Local (5 años)	2019-2020	Categoría senior, Categorías inferiores	Entre 4 y 5 partidos/semana	Categoría provincial	Sí	No	Para mantener o desarrollar la resistencia aeróbica (natación, ciclismo, carrera, saltar a la comba, etc.), Para mantener o desarrollar la fuerza muscular (diferentes técnicas de fortalecimiento muscular con máquinas, con peso libre, con el propio peso corporal, con gomas elásticas, etc.), Para mantener o desarrollar la velocidad (capacidad de realizar sprints en el menor tiempo posible y de repe…	Entre 45 y 60 minutos	4-5 días	Sí	10-15 minutos	No			El descanso es corto, y siento que estoy lo suficientemente activado como para empezar la segunda mitad	Durante el calentamiento inicial, Al finalizar el partido
2021-09-28 12:37:27	Sí	1999-05-24	Hombre	187	90	Málaga	Regional/Autonómica	4	2020-2021	Categoría senior, Categorías inferiores	Entre 3 y 4 partidos/semana	Provincial	Sí	No	Para mantener o desarrollar la resistencia aeróbica (natación, ciclismo, carrera, saltar a la comba, etc.), Para mantener o desarrollar la fuerza muscular (diferentes técnicas de fortalecimiento muscular con máquinas, con peso libre, con el propio peso corporal, con gomas elásticas, etc.), Para mantener o desarrollar la flexibilidad (ya sea con el propio cuerpo, ayuda de otra persona, o con eleme…	Más de 60 minutos	6-7 días	No		No			Charla con el cuerpo arbitral sobre cómo estamos manejando el encuentro.	Al finalizar el partido
2021-09-28 12:39:49	Sí	1992-11-13	Mujer	155	70	Málaga, Málaga	Local	Local (6 años), regional/autonómica (sin experiencia), nacional (sin experiencia), internacional (sin experiencia)	2019-2020	Categoría senior, Categorías inferiores	Entre 6 y 7 partidos semana	Provincial	Sí	No	Para mantener o desarrollar la resistencia aeróbica (natación, ciclismo, carrera, saltar a la comba, etc.)	Más de 60 minutos	1 día	No		No			No tengo motivo alguno, realmente.	Durante el calentamiento inicial
2021-09-28 12:44:25	Sí	1998-04-08	Hombre	185	73	Málaga	Local	Local (3 años)	2020-2021	Categorías inferiores	Entre 5 y 6 partidos semana	Provincial Málaga	Sí	No	Para mantener o desarrollar la fuerza muscular (diferentes técnicas de fortalecimiento muscular con máquinas, con peso libre, con el propio peso corporal, con gomas elásticas, etc.), Para mantener o desarrollar la velocidad (capacidad de realizar sprints en el menor tiempo posible y de repetirlos el mayor número de veces)	Entre 15 y 30 minutos	4-5 días	No		No			Falta de formación acerca de cuál es el calentamiento idóneo para esta ocasión.	Durante el calentamiento inicial, Al finalizar el partido
2021-09-28 12:49:21	Sí	1999-07-07	Mujer	167	80	Málaga	Local	Local (4 años)	2020-2021	Categorías inferiores	Entre 2 y 3 partidos/semana	Senior, junior, cadete, infantil, mini, premini y baby	Sí	No	Para mantener o desarrollar la velocidad (capacidad de realizar sprints en el menor tiempo posible y de repetirlos el mayor número de veces)	Entre 45 y 60 minutos	2-3 días	No		No			Porque comento el partido con mi compañero, me hidrato y veo como va el Acta y los partidos de alrededor	Durante el calentamiento inicial
2021-09-28 12:49:39	Sí	1988-06-23	Hombre	175	78	NERJA	Local	LOCAL 1 AÑO	2020-2021	Categorías inferiores	Entre 1 y 2 partidos/semana	De junior para abajo	Sí	No	Para mantener o desarrollar la resistencia aeróbica (natación, ciclismo, carrera, saltar a la comba, etc.), Para mantener o desarrollar la fuerza muscular (diferentes técnicas de fortalecimiento muscular con máquinas, con peso libre, con el propio peso corporal, con gomas elásticas, etc.)	Más de 60 minutos	4-5 días	Sí	5 minutos	No			No noto que me haga falta	Durante el calentamiento inicial		okay
2021-09-28 12:55:56	Sí	1971-05-27	Hombre	176	85	Malaga	Local	24 años	2018-2019	Categoría senior, Categorías inferiores	Entre 2 y 3 partidos/semana	Provincial	Sí	No	Para mantener o desarrollar la resistencia aeróbica (natación, ciclismo, carrera, saltar a la comba, etc.)	Entre 30 y 45 minutos	2-3 días	Sí	10-12 minutos	No			No hay tiempo en competiciones provinciales. Casi no puedes beber un poco, secarte el sudor, comprobar que la anotacion y acta estan bien...	Durante el calentamiento inicial, Al finalizar el partido		Thank you
2021-09-28 13:00:32	Sí	2003-03-02	Hombre	171	68	Málaga, Málaga	Local	Local(año y medio),Regional/autonomíca (sin experiencia), nacional (sin experiencia), internacional (sin experiencia)	2019-2020	Categorías inferiores	Entre 2 y 3 partidos/semana	Desde baby hasta junior	Sí	No	Para mantener o desarrollar la resistencia aeróbica (natación, ciclismo, carrera, saltar a la comba, etc.), Para mantener o desarrollar la velocidad (capacidad de realizar sprints en el menor tiempo posible y de repetirlos el mayor número de veces)	Entre 15 y 30 minutos	1 día	Sí	3 minutos	No	Trotar o correr, Estiramientos y movilidad articular			Durante el calentamiento inicial
2021-09-28 13:14:33	Sí	2001-04-06	Hombre	177	67	Marbella	Regional/Autonómica	Regional 4 años	2018-2019	Categoría senior, Categorías inferiores	7 o más partidos/semana	Provincial	Sí	Sí	Para mantener o desarrollar la resistencia aeróbica (natación, ciclismo, carrera, saltar a la comba, etc.), Para mantener o desarrollar la fuerza muscular (diferentes técnicas de fortalecimiento muscular con máquinas, con peso libre, con el propio peso corporal, con gomas elásticas, etc.), Para mantener o desarrollar la velocidad (capacidad de realizar sprints en el menor tiempo posible y de repe…	Más de 60 minutos	6-7 días	Sí	5 a 15 minutos, depende del partido a arbitrar, no es lo mismo senior que niños de 5 años	No			El descanso no dura más de 10 minutos no da tiempo a desactivarse, si hago estiramientos	Durante el calentamiento inicial, En el descanso entre primer y segundo cuarto, Durante el descanso entre mitades, En el descanso entre tercer y último cuarto, Al finalizar el partido
2021-09-28 13:36:17	Sí	2004-05-05	Mujer	1.81	65	Marbella, Málaga	Local	Local (2 años)	2020-2021	Categoría senior, Categorías inferiores	Entre 3 y 4 partidos/semana	2020-2021, 2021-2022	Sí	No	Para mantener o desarrollar la resistencia aeróbica (natación, ciclismo, carrera, saltar a la comba, etc.), Para mantener o desarrollar la velocidad (capacidad de realizar sprints en el menor tiempo posible y de repetirlos el mayor número de veces), Para mantener o desarrollar la flexibilidad (ya sea con el propio cuerpo, ayuda de otra persona, o con elementos como toallas, gomas elásticas, foam …	Entre 30 y 45 minutos	6-7 días	No	-	No		-	Soy oficial de mesa	Nunca
2021-09-28 13:47:08	Sí	1973-02-26	Hombre	182	90	Málaga	Local, Regional/Autonómica, Internacional	local 15, regional 10 , internacional 8	2018-2019	Categoría senior, Categorías inferiores	Entre 3 y 4 partidos/semana	Provincial	Sí	No	Para mantener o desarrollar la resistencia aeróbica (natación, ciclismo, carrera, saltar a la comba, etc.), Para mantener o desarrollar la fuerza muscular (diferentes técnicas de fortalecimiento muscular con máquinas, con peso libre, con el propio peso corporal, con gomas elásticas, etc.), Para mantener o desarrollar la velocidad (capacidad de realizar sprints en el menor tiempo posible y de repe…	Entre 30 y 45 minutos	2-3 días	Sí	10min	No				Durante el calentamiento inicial
2021-09-28 13:58:21	Sí	2003-10-01	Mujer	1.66	50 kg	Málaga	Local	Local 2 años, regional,autonómica, nacional e internacional (sin experiencia)	2019-2020	Categorías inferiores	1 partido/semana	Premini Basket y Mini basket	Sí	No	Para mantener o desarrollar la resistencia aeróbica (natación, ciclismo, carrera, saltar a la comba, etc.), Para mantener o desarrollar la velocidad (capacidad de realizar sprints en el menor tiempo posible y de repetirlos el mayor número de veces)	Más de 60 minutos	2-3 días	Sí	Entre 10-15 minutos	No				Durante el calentamiento inicial
2021-09-28 13:59:11	Sí	2001-08-15	Hombre	183	70	Málaga	Local	Local 4 años	2018-2019	Categorías inferiores	Entre 3 y 4 partidos/semana	Provinciales	Sí	No	Para mantener o desarrollar la resistencia aeróbica (natación, ciclismo, carrera, saltar a la comba, etc.), Para mantener o desarrollar la fuerza muscular (diferentes técnicas de fortalecimiento muscular con máquinas, con peso libre, con el propio peso corporal, con gomas elásticas, etc.), Para mantener o desarrollar la velocidad (capacidad de realizar sprints en el menor tiempo posible y de repe…	Más de 60 minutos	4-5 días	No		No			Nunca me he planteado hacerlo, aunque ahora mismo veo que puede ser necesario	Durante el calentamiento inicial
2021-09-28 14:30:06	Sí	2003-11-24	Hombre	192	90	Málaga	Local	Local (2años)	2020-2021	Categorías inferiores	Entre 4 y 5 partidos/semana	2019-2020	Sí	No	Para mantener o desarrollar la resistencia aeróbica (natación, ciclismo, carrera, saltar a la comba, etc.), Para mantener o desarrollar la fuerza muscular (diferentes técnicas de fortalecimiento muscular con máquinas, con peso libre, con el propio peso corporal, con gomas elásticas, etc.), Para mantener o desarrollar la velocidad (capacidad de realizar sprints en el menor tiempo posible y de repe…	Más de 60 minutos	2-3 días	Sí	3 minutos	Sí	Estiramientos y movilidad articular	Para no relajar las articulaciones		Durante el calentamiento inicial, Durante el descanso entre mitades, Al finalizar el partido
2021-09-28 14:35:57	Sí	1981-11-25	Hombre	182	105	Málaga	Local	local (10 años)	2018-2019	Categoría senior, Categorías inferiores	Entre 1 y 2 partidos/semana	provincial	Sí	No	Para mantener o desarrollar la resistencia aeróbica (natación, ciclismo, carrera, saltar a la comba, etc.), Para mantener o desarrollar la fuerza muscular (diferentes técnicas de fortalecimiento muscular con máquinas, con peso libre, con el propio peso corporal, con gomas elásticas, etc.)	Entre 45 y 60 minutos	4-5 días	Sí	5-10 minutos	No	Trotar o correr, Estiramientos y movilidad articular		me mantengo de pie o moviéndome para no enfriarme	Durante el calentamiento inicial
2021-09-28 15:18:27	Sí	1990-10-21	Hombre	188	75	Málaga	Local, Regional/Autonómica	Local y regional 12 años	2018-2019	Categoría senior, Categorías inferiores	7 o más partidos/semana	Provincial y local	Sí	No	Para mantener o desarrollar la resistencia aeróbica (natación, ciclismo, carrera, saltar a la comba, etc.), Para mantener o desarrollar la fuerza muscular (diferentes técnicas de fortalecimiento muscular con máquinas, con peso libre, con el propio peso corporal, con gomas elásticas, etc.), Para mantener o desarrollar la flexibilidad (ya sea con el propio cuerpo, ayuda de otra persona, o con eleme…	Más de 60 minutos	4-5 días	Sí	5-10 minutos	Sí	Estiramientos y movilidad articular	Si no estiro y hago algo de movilidad articular noto que me quedo agarrotado y después no corro tanto ni tan a gusto como antes.		Durante el calentamiento inicial, Durante el descanso entre mitades, Al finalizar el partido
2021-09-28 15:47:17	Sí	1995-02-14	Hombre	172	74	Alhaurín de la Torre (Málaga)	Local	Local (5 años)	2018-2019	Categoría senior	Entre 4 y 5 partidos/semana	FAB Málaga desde categorías inferiores a categorías senior	Sí	No	Para mantener o desarrollar la resistencia aeróbica (natación, ciclismo, carrera, saltar a la comba, etc.), Para mantener o desarrollar la fuerza muscular (diferentes técnicas de fortalecimiento muscular con máquinas, con peso libre, con el propio peso corporal, con gomas elásticas, etc.)	Entre 45 y 60 minutos	4-5 días	Sí	3-5 minutos	No	Trotar o correr, Correr a máxima velocidad (esprintar), Estiramientos y movilidad articular		Desconocimiento de la necesidad	Durante el calentamiento inicial
2021-09-28 15:54:20	Sí	1972-07-06	Hombre	189	99	NERJA (MÁLAGA)	Local	18	2018-2019	Categoría senior, Categorías inferiores	Entre 3 y 4 partidos/semana	PROVINCIAL	Sí	No	Para mantener o desarrollar la resistencia aeróbica (natación, ciclismo, carrera, saltar a la comba, etc.)	Entre 30 y 45 minutos	2-3 días	Sí	10-15	Sí	Estiramientos y movilidad articular			Durante el calentamiento inicial, Durante el descanso entre mitades, Al finalizar el partido
2021-09-28 16:13:01	Sí	1978-04-25	Hombre	1.72	1.12	malaga	Local	29 año	2020-2021	Categoría senior, Categorías inferiores	Entre 6 y 7 partidos semana	provincial	Sí	No	Para mantener o desarrollar la resistencia aeróbica (natación, ciclismo, carrera, saltar a la comba, etc.)	Entre 15 y 30 minutos	2-3 días	Sí	20 minutos antes del partido	No			por que hablamos con el compañero como va el partido	Durante el calentamiento inicial, Al finalizar el partido	para prevenir roturas de l musculo	I hope it serves you. A greeting from a partner, Piti
2021-09-28 16:38:09	Sí	1988-01-18	Hombre	172	75	Álora	Local	local (5años)	2018-2019	Categoría senior, Categorías inferiores	Entre 6 y 7 partidos semana	Provincial senior, provincial categorías inferiores	Sí	No	Para mantener o desarrollar la resistencia aeróbica (natación, ciclismo, carrera, saltar a la comba, etc.), Para mantener o desarrollar la fuerza muscular (diferentes técnicas de fortalecimiento muscular con máquinas, con peso libre, con el propio peso corporal, con gomas elásticas, etc.), Para mantener o desarrollar otras capacidades (coordinación, equilibrio, agilidad)	Más de 60 minutos	4-5 días	Sí	10 minutos	Sí	Trotar o correr, Ejercicio de fuerza (saltos, flexiones, etc.), Estiramientos y movilidad articular, Técnicas de manejo de la respiración (activación/relajación, conciencia)	Para entrar de nuevo con una buena tempratura muscular y mantener la concentración desde el inicio		Durante el calentamiento inicial, Durante el descanso entre mitades, En el descanso entre tercer y último cuarto, Al finalizar el partido
2021-09-28 17:34:39	Sí	2004-05-26	Hombre	177	56	Málaga	Local	Local (1 año) regional (sin experiencia) internacional (sin experiencia)	2020-2021	Categorías inferiores	Entre 3 y 4 partidos/semana	MINIBASKET, PRIMINIBASKET Y BABYBASKET, PRE INFANTIL, INFANTIL, CADETE, JUNIOR.	Sí					Sí	3 minutos	Sí	Estiramientos y movilidad articular, Técnicas de manejo de la respiración (activación/relajación, conciencia)	Para no sufrir lesiones.		Durante el calentamiento inicial, Durante el descanso entre mitades
2021-09-28 20:42:36	Sí	2001-01-07	Hombre	196	92	Málaga	Local	Local 5 años	2019-2020	Categoría senior	Entre 4 y 5 partidos/semana	Senior, junior, hasta Baby, Minicopa Endesa y Fym	Sí	No	Para mantener o desarrollar la resistencia aeróbica (natación, ciclismo, carrera, saltar a la comba, etc.), Para mantener o desarrollar la velocidad (capacidad de realizar sprints en el menor tiempo posible y de repetirlos el mayor número de veces)	Más de 60 minutos	2-3 días	Sí	5-8 minutos	No			No lo creía necesario, feedback primera parte con los compañeros	Durante el calentamiento inicial, Al finalizar el partido
2021-09-28 23:21:49	Sí	2004-09-20	Hombre	188	77.2	Torre del Mar, Málaga	Local	Local (1 año), regional/autonómica (sin experiencia), nacional (sin experiencia), internacional (sin experiencia)	2020-2021	Categorías inferiores	Entre 1 y 2 partidos/semana	FAB, ligas provinciales	Sí	No	Para mantener o desarrollar la resistencia aeróbica (natación, ciclismo, carrera, saltar a la comba, etc.), Para mantener o desarrollar la fuerza muscular (diferentes técnicas de fortalecimiento muscular con máquinas, con peso libre, con el propio peso corporal, con gomas elásticas, etc.), Para mantener o desarrollar la velocidad (capacidad de realizar sprints en el menor tiempo posible y de repe…	Más de 60 minutos	4-5 días	Sí	3-5 minutos	Sí	Estiramientos y movilidad articular, Técnicas de manejo de la respiración (activación/relajación, conciencia)	Para continuar caliente		Durante el calentamiento inicial, Durante el descanso entre mitades
2021-09-29 14:39:20	Sí	1999-07-10	Hombre	180	60	Málaga	Regional/Autonómica	5 años	2018-2019	Categoría senior, Categorías inferiores	Entre 4 y 5 partidos/semana	Camp. Pr. Málaga	Sí	No	Para mantener o desarrollar la resistencia aeróbica (natación, ciclismo, carrera, saltar a la comba, etc.), Para mantener o desarrollar otras capacidades (coordinación, equilibrio, agilidad)	Más de 60 minutos	6-7 días	No		No			Charla con los compañeros sobre el arbitraje y partido, no lo considero de gran importancia.	Nunca	Falta de tiempo. Poco tiempo para cambiar de pabellón, poco rango de tiempo para llegar de un partido a otro. No lo considero de gran importancia. Si tengo sobrecarga, realizo estiramientos al llegar a mi casa.
2021-10-01 18:32:49	Sí	1985-03-06	Hombre	180	74	Málaga	Local, Regional/Autonómica, Nacional	15 en total, 7 en feb	2018-2019	Categoría senior, Categorías inferiores	Entre 4 y 5 partidos/semana	Grupo 3	Sí	No	Para mantener o desarrollar la resistencia aeróbica (natación, ciclismo, carrera, saltar a la comba, etc.), Para mantener o desarrollar la fuerza muscular (diferentes técnicas de fortalecimiento muscular con máquinas, con peso libre, con el propio peso corporal, con gomas elásticas, etc.), Para mantener o desarrollar la velocidad (capacidad de realizar sprints en el menor tiempo posible y de repe…	Más de 60 minutos	4-5 días	Sí	10-15 minutos	No	Trotar o correr, Correr a máxima velocidad (esprintar), Estiramientos y movilidad articular		No lo he considerado necesario	Durante el calentamiento inicial, Al finalizar el partido
2021-10-01 18:33:36	Sí	1994-03-03	Hombre	183	80	Madrid, Madrid	Local, Regional/Autonómica, Nacional	Local 11 años, autonómica 9 años, nacional 2 años, internacional sin experiencis	2018-2019	Categoría senior, Categorías inferiores	Entre 4 y 5 partidos/semana	Nacional y categorías autonomicas	Sí	Sí	Para mantener o desarrollar la fuerza muscular (diferentes técnicas de fortalecimiento muscular con máquinas, con peso libre, con el propio peso corporal, con gomas elásticas, etc.)	Más de 60 minutos	4-5 días	Sí	5-10 minutos	No			No me parece necesario	Durante el calentamiento inicial
2021-10-01 18:33:38	Sí	1996-09-18	Hombre	179	88	Tiana, Barcelona	Local, Regional/Autonómica, Nacional	Local (8 años), regional/autonómica (8 años), nacional (2 años), internacional (sin experiencia)	2020-2021	Categoría senior	Entre 1 y 2 partidos/semana	FEB grupo 3	Sí	No	Para mantener o desarrollar la resistencia aeróbica (natación, ciclismo, carrera, saltar a la comba, etc.), Para mantener o desarrollar la fuerza muscular (diferentes técnicas de fortalecimiento muscular con máquinas, con peso libre, con el propio peso corporal, con gomas elásticas, etc.)	Entre 45 y 60 minutos	4-5 días	Sí	3-4 minutos	No	Trotar o correr, Correr a máxima velocidad (esprintar), Estiramientos y movilidad articular		No hay demasiado tiempo, una vez se vuelve del vestuario en descanso de 10 minutos.	Durante el calentamiento inicial		Good luck with the work!
2021-10-01 18:33:40	Sí	1991-04-30	Hombre	186	77	León	Nacional	7 nacional	2020-2021	Categoría senior, Categorías inferiores	Entre 1 y 2 partidos/semana	Vinculado Grupo 2 (actual G3)	Sí	No	Para mantener o desarrollar la resistencia aeróbica (natación, ciclismo, carrera, saltar a la comba, etc.)	Entre 30 y 45 minutos	4-5 días	Sí	7-14 min	Sí	Estiramientos y movilidad articular	Entrar concentrado en los 3Q		Durante el calentamiento inicial, Durante el descanso entre mitades, Al finalizar el partido
2021-10-01 18:33:52	Sí	1991-10-14	Hombre	177	70	MADRID	Local, Regional/Autonómica, Nacional	Local (2 años), autonómica (11 años), nacional (4 años)	2018-2019	Categoría senior, Categorías inferiores	Entre 1 y 2 partidos/semana	FEB Grupo 3 (EBA y LF2) y categorías autonómicas	Sí	No	Para mantener o desarrollar la resistencia aeróbica (natación, ciclismo, carrera, saltar a la comba, etc.), Para mantener o desarrollar la fuerza muscular (diferentes técnicas de fortalecimiento muscular con máquinas, con peso libre, con el propio peso corporal, con gomas elásticas, etc.), Para mantener o desarrollar la velocidad (capacidad de realizar sprints en el menor tiempo posible y de repe…	Entre 45 y 60 minutos	2-3 días	Sí	(10-15 minutos)	No	Trotar o correr, Correr a máxima velocidad (esprintar), Estiramientos y movilidad articular		Falta de tiempo	Durante el calentamiento inicial
2021-10-01 18:34:12	Sí	1990-10-22	Hombre	1.8	76	Valencia	Nacional	Regional/autonómica (6años) nacional (4años) internacional ( sin experiencia)	2020-2021	Categoría senior	Entre 1 y 2 partidos/semana	Grupo 2	Sí	No	Para mantener o desarrollar la resistencia aeróbica (natación, ciclismo, carrera, saltar a la comba, etc.), Para mantener o desarrollar la fuerza muscular (diferentes técnicas de fortalecimiento muscular con máquinas, con peso libre, con el propio peso corporal, con gomas elásticas, etc.)	Entre 30 y 45 minutos	4-5 días	Sí	7 minutos	No			Realmente no tengo ningún motivo , pero debería hacerlo	Al finalizar el partido
2021-10-01 18:34:30	Sí	1987-03-23	Hombre	184	76	Barcelona	Regional/Autonómica, Nacional	Autonomica 10 años, Nacional 3 años, internacional sin experiencia	2019-2020	Categoría senior, Categorías inferiores	Entre 2 y 3 partidos/semana	FEB Grupo 3 + Categorias autonómicas	Sí	No	Para mantener o desarrollar la resistencia aeróbica (natación, ciclismo, carrera, saltar a la comba, etc.), Para mantener o desarrollar la fuerza muscular (diferentes técnicas de fortalecimiento muscular con máquinas, con peso libre, con el propio peso corporal, con gomas elásticas, etc.)	Entre 45 y 60 minutos	4-5 días	Sí	5-10 minutos	No			Falta de tiempo en media parte	Durante el calentamiento inicial, Al finalizar el partido
2021-10-01 18:34:40	Sí	1993-04-21	Hombre	186	84	Pamplona, Navarra	Local, Regional/Autonómica, Nacional	10	2020-2021	Categoría senior, Categorías inferiores	Entre 2 y 3 partidos/semana	Grupo 2	Sí	No	Para mantener o desarrollar la resistencia aeróbica (natación, ciclismo, carrera, saltar a la comba, etc.), Para mantener o desarrollar la fuerza muscular (diferentes técnicas de fortalecimiento muscular con máquinas, con peso libre, con el propio peso corporal, con gomas elásticas, etc.)	Entre 45 y 60 minutos	2-3 días	Sí	5 minutos	No			Poca costumbre	Durante el calentamiento inicial, Al finalizar el partido
2021-10-01 18:34:53	Sí	1988-04-11	Mujer	168	50	Madrid	Nacional	Autonómica 15 años, nacional 7 años	2021-2022	Categoría senior	1 partido/semana	Grupo 2	Sí	No	Para mantener o desarrollar la fuerza muscular (diferentes técnicas de fortalecimiento muscular con máquinas, con peso libre, con el propio peso corporal, con gomas elásticas, etc.), Para mantener o desarrollar otras capacidades (coordinación, equilibrio, agilidad)	Entre 45 y 60 minutos	2-3 días	Sí	15-20 min	No			Falta de hábito	Durante el calentamiento inicial, Al finalizar el partido
2021-10-01 18:35:08	Sí	1990-02-28	Hombre	183	83	Barcelona	Nacional	regional/autonómica (4 años), nacional (4 años)	2020-2021	Categoría senior, Categorías inferiores	Entre 2 y 3 partidos/semana	FEB Grupo 3	Sí	No	Para mantener o desarrollar la resistencia aeróbica (natación, ciclismo, carrera, saltar a la comba, etc.), Para mantener o desarrollar la fuerza muscular (diferentes técnicas de fortalecimiento muscular con máquinas, con peso libre, con el propio peso corporal, con gomas elásticas, etc.), Para mantener o desarrollar la velocidad (capacidad de realizar sprints en el menor tiempo posible y de repe…	Entre 45 y 60 minutos	4-5 días	Sí	10 minutos	No				Durante el descanso entre mitades, Al finalizar el partido
2021-10-01 18:35:23	Sí	1995-10-29	Hombre	178	76	Zumarraga, guipuzkoa	Local, Regional/Autonómica, Nacional	Regional(12), autonómica(9),Nacional(5)	2020-2021	Categoría senior	7 o más partidos/semana	Grupo 3	Sí	No	Para mantener o desarrollar la resistencia aeróbica (natación, ciclismo, carrera, saltar a la comba, etc.), Para mantener o desarrollar la fuerza muscular (diferentes técnicas de fortalecimiento muscular con máquinas, con peso libre, con el propio peso corporal, con gomas elásticas, etc.), Para mantener o desarrollar la velocidad (capacidad de realizar sprints en el menor tiempo posible y de repe…	Más de 60 minutos	6-7 días	Sí	30 min	No			No hay tiempo	Durante el calentamiento inicial, Al finalizar el partido
2021-10-01 18:36:01	Sí	1993-06-02	Mujer	170	57	A Coruña	Local, Regional/Autonómica, Nacional	Local (11) Autonómica (9) Nacional (6)	2019-2020	Categoría senior, Categorías inferiores	Entre 2 y 3 partidos/semana	GRUPO 1 (2018-2019/2019-2020/2021-2021) GRUPO 2(2021-2022) GRUPO 3(2016-2017/2017-2018)	Sí	No	Para mantener o desarrollar la fuerza muscular (diferentes técnicas de fortalecimiento muscular con máquinas, con peso libre, con el propio peso corporal, con gomas elásticas, etc.), Para mantener o desarrollar la velocidad (capacidad de realizar sprints en el menor tiempo posible y de repetirlos el mayor número de veces), Para mantener o desarrollar otras capacidades (coordinación, equilibrio, a…	Más de 60 minutos	2-3 días	Sí	5-7 minutos calentamiento, 5 minutos estiramiento	No			No tengo esa rutina porque no la considero necesaria	Durante el calentamiento inicial, Al finalizar el partido
2021-10-01 18:36:39	Sí	1992-02-12	Hombre	182	82	Villanueva del Pardillo, Madrid	Nacional	Local (varios años), autonómica (1 año), nacional (4), internacional (s/e)	2018-2019	Categoría senior, Categorías inferiores	Entre 3 y 4 partidos/semana	FEB Grupo 2 (por entonces Liga EBA y LF2), y categorías autonómicas	Sí	No	Para mantener o desarrollar la resistencia aeróbica (natación, ciclismo, carrera, saltar a la comba, etc.), Para mantener o desarrollar la fuerza muscular (diferentes técnicas de fortalecimiento muscular con máquinas, con peso libre, con el propio peso corporal, con gomas elásticas, etc.)	Más de 60 minutos	2-3 días	Sí	12-15 minutos	No			Solemos hablar del partido en sí, y en 10' que dura el descanso no sacó tiempo	Durante el calentamiento inicial
2021-10-01 18:36:47	Sí	1994-03-08	Hombre	189	97	Sant Iscle de Vallalta, Barcelona	Local, Regional/Autonómica, Nacional	Local: 11 años, Regional/Autonómica 7, Nacional 1 año, Internacional sin experiencia	2018-2019	Categoría senior, Categorías inferiores	Entre 5 y 6 partidos semana	Autonómica	Sí	No	Para mantener o desarrollar la resistencia aeróbica (natación, ciclismo, carrera, saltar a la comba, etc.), Para mantener o desarrollar la fuerza muscular (diferentes técnicas de fortalecimiento muscular con máquinas, con peso libre, con el propio peso corporal, con gomas elásticas, etc.)	Más de 60 minutos	4-5 días	No		No			Nunca me lo he planteado	Durante el calentamiento inicial
2021-10-01 18:37:19	Sí	1991-11-30	Hombre	188	86	Malaga	Nacional	Local 6 autonomica 2 nacional 7	2020-2021	Categoría senior	1 partido/semana	Grupo 1	Sí	No	Para mantener o desarrollar la resistencia aeróbica (natación, ciclismo, carrera, saltar a la comba, etc.), Para mantener o desarrollar la fuerza muscular (diferentes técnicas de fortalecimiento muscular con máquinas, con peso libre, con el propio peso corporal, con gomas elásticas, etc.), Para mantener o desarrollar otras capacidades (coordinación, equilibrio, agilidad)	Entre 45 y 60 minutos	2-3 días	Sí	10	No			Utilizo para descansar, cambiar camiseta, y feedback entre compañeros	Durante el calentamiento inicial, Al finalizar el partido
2021-10-01 18:37:57	Sí	1994-09-25	Hombre	177	72	Torrent	Local, Regional/Autonómica	Locas (7 años), regional/autonómica (4 años)	2018-2019	Categoría senior, Categorías inferiores	Entre 5 y 6 partidos semana	Cto. 1 división nacional	Sí	No	Para mantener o desarrollar la resistencia aeróbica (natación, ciclismo, carrera, saltar a la comba, etc.), Para mantener o desarrollar la fuerza muscular (diferentes técnicas de fortalecimiento muscular con máquinas, con peso libre, con el propio peso corporal, con gomas elásticas, etc.)	Más de 60 minutos	4-5 días	Sí	5-10 minutos	No			Porque en ese tiempo no me enfrio lo suficiente	Durante el calentamiento inicial
2021-10-01 18:38:49	Sí	1988-03-13	Hombre	183	84	Barcelona	Nacional	Regional/autonómica (15 años), nacional (5 años)	2020-2021	Categoría senior	Entre 1 y 2 partidos/semana	Grupo 3 FEB (Liga EBA, LF2)	No	No	Para mantener o desarrollar la resistencia aeróbica (natación, ciclismo, carrera, saltar a la comba, etc.)	Entre 45 y 60 minutos	2-3 días	Sí	5-10 minutos	No	Trotar o correr, Estiramientos y movilidad articular			Durante el calentamiento inicial, Al finalizar el partido
2021-10-01 18:41:34	Sí	1991-11-15	Hombre	182	80	Murcia	Nacional	Local 4 años. Autonómica 2 años. Nacional 6	2020-2021	Categoría senior	Entre 1 y 2 partidos/semana	Grupo 3	Sí	Sí	Para mantener o desarrollar la resistencia aeróbica (natación, ciclismo, carrera, saltar a la comba, etc.), Para mantener o desarrollar la fuerza muscular (diferentes técnicas de fortalecimiento muscular con máquinas, con peso libre, con el propio peso corporal, con gomas elásticas, etc.), Para mantener o desarrollar la velocidad (capacidad de realizar sprints en el menor tiempo posible y de repe…	Entre 45 y 60 minutos	1 día	Sí	Entre 3-5 minutos	No			Falta de rutina.	Durante el calentamiento inicial, Al finalizar el partido
2021-10-01 18:43:04	Sí	1994-02-25	Hombre	181	78	Vilanova de Arousa	Local, Regional/Autonómica, Nacional	Local(2 años), Autonomico (2 años) , Nacional(4 años)	2020-2021	Categoría senior, Categorías inferiores	Entre 5 y 6 partidos semana	Grupo 3 FEB	Sí	No	Para mantener o desarrollar la resistencia aeróbica (natación, ciclismo, carrera, saltar a la comba, etc.), Para mantener o desarrollar la fuerza muscular (diferentes técnicas de fortalecimiento muscular con máquinas, con peso libre, con el propio peso corporal, con gomas elásticas, etc.)	Más de 60 minutos	4-5 días	No		Sí	Estiramientos y movilidad articular, Ejercicios de coordinación y equilibrio	Porque los equipos van a salir a tope y es uno de los momentos importantes del partido, hay que estar activado		Durante el calentamiento inicial, Durante el descanso entre mitades
2021-10-01 18:43:16	Sí	1988-03-04	Hombre	187	80	Bilbao	Nacional	Local (2 años), autonómica (2 años), nacional (8 años) e internacional (sin experiencia)	2018-2019	Categoría senior	Entre 1 y 2 partidos/semana	Grupo 1 (LEB oro, LEB plata y LF)	Sí	No	Para mantener o desarrollar la resistencia aeróbica (natación, ciclismo, carrera, saltar a la comba, etc.), Para mantener o desarrollar la fuerza muscular (diferentes técnicas de fortalecimiento muscular con máquinas, con peso libre, con el propio peso corporal, con gomas elásticas, etc.)	Más de 60 minutos	4-5 días	Sí	5-10 minutos	Sí	Estiramientos y movilidad articular	Para que el musculo no este frio y evitar lesiones.		Durante el calentamiento inicial, Durante el descanso entre mitades, Al finalizar el partido
2021-10-01 18:45:31	Sí	1973-01-10	Hombre	173	72	Arcahueja (León)	Local, Nacional	Local (4 años), Nacional (30 años)	2018-2019	Categoría senior	Entre 1 y 2 partidos/semana	Feb grupo 3	Sí	No	Para mantener o desarrollar la resistencia aeróbica (natación, ciclismo, carrera, saltar a la comba, etc.), Para mantener o desarrollar la velocidad (capacidad de realizar sprints en el menor tiempo posible y de repetirlos el mayor número de veces)	Entre 45 y 60 minutos	4-5 días	Sí	10-15 minutos	No			El descanso dura 10 minutos. Entre ir al vestuario y volver se pasan 4-5 minutos. Teniendo que estar en el campo con un mínimo de 3 minutos antes de empezar. Quedan un par de minutos en los que, por norma, no me suelo quedar frío.	Durante el calentamiento inicial, Al finalizar el partido
2021-10-01 18:53:36	Sí	1986-07-04	Hombre	191	87	San Fernando, Cádiz	Local, Regional/Autonómica, Nacional	Local (1 año) autonómico (3 años) nacional (12 años)	2018-2019	Categoría senior	Entre 1 y 2 partidos/semana	FEB, grupo 3	Sí	No	Para mantener o desarrollar la resistencia aeróbica (natación, ciclismo, carrera, saltar a la comba, etc.), Para mantener o desarrollar la fuerza muscular (diferentes técnicas de fortalecimiento muscular con máquinas, con peso libre, con el propio peso corporal, con gomas elásticas, etc.), Para mantener o desarrollar la flexibilidad (ya sea con el propio cuerpo, ayuda de otra persona, o con eleme…	Entre 45 y 60 minutos	4-5 días	Sí	10-15 minutos	No			No hay suficiente espacio de tiempo.	Durante el calentamiento inicial
2021-10-01 18:54:37	Sí	1990-04-27	Hombre	172	71	Santiago de Compostela, A Coruña	Local, Regional/Autonómica, Nacional	Local (10 años), Autonómica (9 años), Nacional (7años)	2020-2021	Categoría senior, Categorías inferiores	Entre 3 y 4 partidos/semana	Grupo 3	Sí	No	Para mantener o desarrollar la fuerza muscular (diferentes técnicas de fortalecimiento muscular con máquinas, con peso libre, con el propio peso corporal, con gomas elásticas, etc.), Para mantener o desarrollar la velocidad (capacidad de realizar sprints en el menor tiempo posible y de repetirlos el mayor número de veces), Para mantener o desarrollar la flexibilidad (ya sea con el propio cuerpo, …	Más de 60 minutos	4-5 días	Sí	5-10 minutos	No			Cuestión de tiempo. El descanso dura 10 minutos, entre el acceso al vestuario, revisión de acta, comentarios con el compañero y vuelta a pista , resulta complicado. Entiendo que en categorías con 15 minutos es factible.	Durante el calentamiento inicial, Al finalizar el partido
2021-10-01 19:01:00	Sí	1988-03-15	Hombre	190	88	Ourense	Local, Regional/Autonómica, Nacional	Local (2 años), regional/autonomica (2 años), nacional (5 años)	2019-2020	Categoría senior, Categorías inferiores	Entre 1 y 2 partidos/semana	Grupo 2 (ahora grupo 3)	Sí	No	Para mantener o desarrollar la resistencia aeróbica (natación, ciclismo, carrera, saltar a la comba, etc.), Para mantener o desarrollar la flexibilidad (ya sea con el propio cuerpo, ayuda de otra persona, o con elementos como toallas, gomas elásticas, foam roller, etc.), Para mantener o desarrollar otras capacidades (coordinación, equilibrio, agilidad)	Entre 30 y 45 minutos	2-3 días	Sí	5 minutos	No			Nunca me he parado a pensar en ello y por tanto nunca lo hago	Durante el calentamiento inicial, Al finalizar el partido
2021-10-01 19:01:43	Sí	1994-08-25	Hombre	190	101	Lugo	Local, Regional/Autonómica, Nacional	4 años zonal; 2 años autonómica; 4 años Nacional	2018-2019	Categoría senior, Categorías inferiores	Entre 5 y 6 partidos semana	G3 FEB	Sí	Sí	Para mantener o desarrollar la resistencia aeróbica (natación, ciclismo, carrera, saltar a la comba, etc.), Para mantener o desarrollar la fuerza muscular (diferentes técnicas de fortalecimiento muscular con máquinas, con peso libre, con el propio peso corporal, con gomas elásticas, etc.), Para mantener o desarrollar la velocidad (capacidad de realizar sprints en el menor tiempo posible y de repe…	Más de 60 minutos	4-5 días	Sí	5 mins de carrera continua, y 2-3 mins de estiramientos dinámicos	No			No tengo, pero debería hacerlos para no salir frío después del descanso, pero en partidos de 10 mins de descanso apenas da tiempo	Durante el calentamiento inicial, Al finalizar el partido
2021-10-01 19:02:53	Sí	1994-11-05	Hombre	166	62	Tenerife	Nacional	3 años provincial, 3 años nacional (autonómica) y 2 años Nacional (EBA)	2019-2020	Categoría senior	Entre 1 y 2 partidos/semana	FEB Grupo III LIGA EBA Y LF2	Sí	No	Para mantener o desarrollar la resistencia aeróbica (natación, ciclismo, carrera, saltar a la comba, etc.), Para mantener o desarrollar la fuerza muscular (diferentes técnicas de fortalecimiento muscular con máquinas, con peso libre, con el propio peso corporal, con gomas elásticas, etc.), Para mantener o desarrollar otras capacidades (coordinación, equilibrio, agilidad)	Más de 60 minutos	4-5 días	Sí	5 minutos de calentamiento, movilidad articular y carrera a trote	No			Sigo activo y no me cuesta continuar en el partido al mismo ritmo	Durante el calentamiento inicial, Al finalizar el partido
2021-10-01 19:03:04	Sí	1988-07-25	Hombre	1.74	84.8	Lleida	Local, Regional/Autonómica, Nacional	Local (6años) autonómica (12 años) nacional (4años)	2020-2021	Categoría senior	Entre 1 y 2 partidos/semana	Grupo 3, EBA y Liga Femenina 2	Sí	No	Para mantener o desarrollar la resistencia aeróbica (natación, ciclismo, carrera, saltar a la comba, etc.), Para mantener o desarrollar la fuerza muscular (diferentes técnicas de fortalecimiento muscular con máquinas, con peso libre, con el propio peso corporal, con gomas elásticas, etc.), Para mantener o desarrollar la flexibilidad (ya sea con el propio cuerpo, ayuda de otra persona, o con eleme…	Más de 60 minutos	4-5 días	Sí	De 10 a 15 minutos mínimo.	No			Sinceramente nunca se me ha pasado por la cabeza.	Durante el calentamiento inicial, Al finalizar el partido
2021-10-01 19:07:33	Sí	1988-01-19	Hombre	188	78	Pamplona	Local, Regional/Autonómica, Nacional	Local (11 años) regional/autonómica (9 años) nacional (4 años) internacional (sin experiencia)	2020-2021	Categoría senior, Categorías inferiores	Entre 4 y 5 partidos/semana	Grupo 3 y categorías autonómica/local	Sí	No				Sí	5-10 minutos	No			No me lo había planteado nunca.	Durante el calentamiento inicial, Al finalizar el partido		Thanks you and all the best with the study.
2021-10-01 19:26:58	Sí	1989-11-30	Hombre	172	74	Córdoba	Nacional	Nacional(11 años)	2020-2021	Categoría senior	1 partido/semana	Grupo 3 FEB (2020-21)	Sí	Sí	Para mantener o desarrollar la fuerza muscular (diferentes técnicas de fortalecimiento muscular con máquinas, con peso libre, con el propio peso corporal, con gomas elásticas, etc.), Para mantener o desarrollar la velocidad (capacidad de realizar sprints en el menor tiempo posible y de repetirlos el mayor número de veces)	Más de 60 minutos	4-5 días	Sí	15-20 minutos	Sí	Estiramientos y movilidad articular, Ejercicios de coordinación y equilibrio, Técnicas de manejo de la respiración (activación/relajación, conciencia)	Para reactivarme a nivel muscular y prevenir lesiones		Durante el calentamiento inicial, Durante el descanso entre mitades, Al finalizar el partido
2021-10-01 19:30:13	Sí	1975-12-10	Hombre	176	72	Barcelona	Regional/Autonómica, Nacional	Autonómica (9 años), Nacional (24)	2018-2019	Categoría senior, Categorías inferiores	Entre 2 y 3 partidos/semana	FEB Grupo 1	Sí	No	Para mantener o desarrollar la resistencia aeróbica (natación, ciclismo, carrera, saltar a la comba, etc.), Para mantener o desarrollar la velocidad (capacidad de realizar sprints en el menor tiempo posible y de repetirlos el mayor número de veces)	Entre 45 y 60 minutos	6-7 días	Sí	5 minutos	No			Acostumbro a utilitzar el descanso para el trabajo en equipo y trabajar aspectos más mentales que físicos.	Durante el calentamiento inicial, Al finalizar el partido
2021-10-01 19:54:36	Sí	1991-10-16	Hombre	191	79	Vilagarcía de Arousa, Pontevedra	Local, Regional/Autonómica, Nacional	Local 7 años Autonómica 3 años Nacional 1 año	2020-2021	Categoría senior, Categorías inferiores	Entre 3 y 4 partidos/semana	Grupo 3	Sí	No	Para mantener o desarrollar la resistencia aeróbica (natación, ciclismo, carrera, saltar a la comba, etc.), Para mantener o desarrollar la fuerza muscular (diferentes técnicas de fortalecimiento muscular con máquinas, con peso libre, con el propio peso corporal, con gomas elásticas, etc.)	Más de 60 minutos	4-5 días	Sí	5 - 10 minutos	No			Preferencia por realizar charlas técnicas con el compañero	Durante el calentamiento inicial, Al finalizar el partido
2021-10-01 19:58:25	Sí	1973-03-11	Hombre	189	80	LEON	Local, Regional/Autonómica, Nacional	NACIONAL 23 años, REGIONAL 7 años, LOCAL 3 años	2018-2019	Categoría senior	1 partido/semana	GRUPO 1	Sí	No	Para mantener o desarrollar la resistencia aeróbica (natación, ciclismo, carrera, saltar a la comba, etc.), Para mantener o desarrollar la flexibilidad (ya sea con el propio cuerpo, ayuda de otra persona, o con elementos como toallas, gomas elásticas, foam roller, etc.), Para mantener o desarrollar otras capacidades (coordinación, equilibrio, agilidad)	Entre 30 y 45 minutos	2-3 días	Sí	5-10 min	No				Durante el calentamiento inicial, Al finalizar el partido
2021-10-01 20:09:16	Sí	1994-08-12	Hombre	181	74	Madrid, Madrid	Local, Regional/Autonómica, Nacional	Local (10 años) regional/autonomica (6 años) nacional (primera temporada)	2019-2020	Categoría senior, Categorías inferiores	Entre 4 y 5 partidos/semana	1a Nacional de Madrid y todas las categorias inferiores	Sí	Sí	Para mantener o desarrollar la resistencia aeróbica (natación, ciclismo, carrera, saltar a la comba, etc.), Para mantener o desarrollar la fuerza muscular (diferentes técnicas de fortalecimiento muscular con máquinas, con peso libre, con el propio peso corporal, con gomas elásticas, etc.)	Más de 60 minutos	4-5 días	Sí	5 minutos	Sí	Estiramientos y movilidad articular	Importante mantenerse activo para no entrar demasiado relajado a la segunda parte y que ese estado de relajación nos haga comete errores		Durante el calentamiento inicial, Durante el descanso entre mitades, Al finalizar el partido
2021-10-01 20:16:35	Sí	1992-07-03	Hombre	180	79	Girona	Nacional	Nacional 11 años	2018-2019	Categoría senior	Entre 1 y 2 partidos/semana	2	Sí	No	Para mantener o desarrollar la resistencia aeróbica (natación, ciclismo, carrera, saltar a la comba, etc.)	Entre 30 y 45 minutos	2-3 días	Sí	10 minutos	No			Es poco tiempo	Durante el calentamiento inicial, Al finalizar el partido
2021-10-01 20:16:50	Sí	1993-03-30	Hombre	186	82	Barcelona	Nacional	Regional (5) Nacional (5)	2018-2019	Categoría senior	1 partido/semana	Grupo 1	Sí	No	Para mantener o desarrollar la resistencia aeróbica (natación, ciclismo, carrera, saltar a la comba, etc.), Para mantener o desarrollar la fuerza muscular (diferentes técnicas de fortalecimiento muscular con máquinas, con peso libre, con el propio peso corporal, con gomas elásticas, etc.)	Entre 45 y 60 minutos	4-5 días	No	10 minutos	No			Desconocimiento y falta de consciencia.	Durante el calentamiento inicial
2021-10-01 20:18:03	Sí	1991-12-02	Hombre	174	72	Getxo, Bizkaia	Local, Regional/Autonómica, Nacional	Local 11 años, autonómica 8 años y nacional 4 años	2020-2021	Categoría senior	Entre 1 y 2 partidos/semana	Grupo 3	Sí	Sí	Para mantener o desarrollar la resistencia aeróbica (natación, ciclismo, carrera, saltar a la comba, etc.), Para mantener o desarrollar la fuerza muscular (diferentes técnicas de fortalecimiento muscular con máquinas, con peso libre, con el propio peso corporal, con gomas elásticas, etc.), Para mantener o desarrollar la velocidad (capacidad de realizar sprints en el menor tiempo posible y de repe…	Más de 60 minutos	6-7 días	No		No			Falta de conocimiento	Nunca
2021-10-01 21:20:53	Sí	1986-08-15	Mujer	171	59	Alcalá de Henares	Local, Regional/Autonómica, Nacional	20 años local, 20 años autonómica, 5 años nacional	2020-2021	Categoría senior, Categorías inferiores	Entre 1 y 2 partidos/semana	Grupo 1	Sí	No	Para mantener o desarrollar la resistencia aeróbica (natación, ciclismo, carrera, saltar a la comba, etc.), Para mantener o desarrollar la fuerza muscular (diferentes técnicas de fortalecimiento muscular con máquinas, con peso libre, con el propio peso corporal, con gomas elásticas, etc.), Para mantener o desarrollar la flexibilidad (ya sea con el propio cuerpo, ayuda de otra persona, o con eleme…	Más de 60 minutos	4-5 días	Sí	10 minutos	No			Por poco tiempo	Durante el calentamiento inicial, Al finalizar el partido		Concentration techniques would be appreciated before and at the break of the matches
2021-10-01 21:47:23	Sí	1994-11-19	Hombre	185	77	Andoain, Gipuzkoa	Regional/Autonómica	9 años	2018-2019	Categoría senior	Entre 4 y 5 partidos/semana	Autonomica	Sí	No	Para mantener o desarrollar la fuerza muscular (diferentes técnicas de fortalecimiento muscular con máquinas, con peso libre, con el propio peso corporal, con gomas elásticas, etc.)	Entre 45 y 60 minutos	4-5 días	No	5-10 minutos	Sí	Estiramientos y movilidad articular	Para no perder la actividad y que se enfrien las articulaciones		Durante el calentamiento inicial, En el descanso entre primer y segundo cuarto, Al finalizar el partido
2021-10-01 21:47:54	Sí	1989-03-11	Hombre	177	7	Avilés, Asturias	Local, Regional/Autonómica, Nacional	Autonómica 12 años , nacional 5 años	2019-2020	Categoría senior, Categorías inferiores	Entre 3 y 4 partidos/semana	Grupo 3	Sí	No	Para mantener o desarrollar la resistencia aeróbica (natación, ciclismo, carrera, saltar a la comba, etc.), Para mantener o desarrollar la fuerza muscular (diferentes técnicas de fortalecimiento muscular con máquinas, con peso libre, con el propio peso corporal, con gomas elásticas, etc.), Para mantener o desarrollar la flexibilidad (ya sea con el propio cuerpo, ayuda de otra persona, o con eleme…	Más de 60 minutos	2-3 días	Sí	15'	No			Falta de tiempo	Durante el calentamiento inicial, Al finalizar el partido
2021-10-01 21:51:35	Sí	1994-06-01	Mujer	1.6	55	Melilla	Local, Regional/Autonómica, Nacional	Local y autonómica (6años) nacional (3 años)	2018-2019	Categoría senior	Entre 1 y 2 partidos/semana	FEB grupo 3	Sí	Sí	Para mantener o desarrollar la resistencia aeróbica (natación, ciclismo, carrera, saltar a la comba, etc.), Para mantener o desarrollar la fuerza muscular (diferentes técnicas de fortalecimiento muscular con máquinas, con peso libre, con el propio peso corporal, con gomas elásticas, etc.), Para mantener o desarrollar la velocidad (capacidad de realizar sprints en el menor tiempo posible y de repe…	Más de 60 minutos	4-5 días	Sí	15-20 mins	No			Intento descansar	Durante el calentamiento inicial
2021-10-01 21:55:33	Sí	1994-12-13	Mujer	177	72	MADRID	Nacional	3 AÑOS GRUPO 3 FEB; 6 AÑOS AUTONÓMICA	2019-2020	Categoría senior, Categorías inferiores	Entre 6 y 7 partidos semana	Grupo 3 FEB Y Categoría Autonómica	Sí	No	Para mantener o desarrollar la fuerza muscular (diferentes técnicas de fortalecimiento muscular con máquinas, con peso libre, con el propio peso corporal, con gomas elásticas, etc.), Para mantener o desarrollar otras capacidades (coordinación, equilibrio, agilidad)	Entre 45 y 60 minutos	4-5 días	Sí	Entre 5-10 min	No				Durante el calentamiento inicial
2021-10-01 22:02:27	Sí	1974-01-28	Hombre	1.75	73	Valladolid	Local, Regional/Autonómica, Nacional	Local 30 años, autonómica 28, nacional 24	2019-2020	Categoría senior	Entre 2 y 3 partidos/semana	Feb grupo 2	Sí	Sí	Para mantener o desarrollar la resistencia aeróbica (natación, ciclismo, carrera, saltar a la comba, etc.), Para mantener o desarrollar la velocidad (capacidad de realizar sprints en el menor tiempo posible y de repetirlos el mayor número de veces), Para mantener o desarrollar otras capacidades (coordinación, equilibrio, agilidad)	Entre 45 y 60 minutos	4-5 días	Sí	Entre 16-20	Sí	Estiramientos y movilidad articular	Para seguir activo para comenzar tras el descanso		Durante el calentamiento inicial, Al finalizar el partido		Thank you
2021-10-01 22:06:42	Sí	1987-04-06	Hombre	178	71	Zaragoza	Local, Regional/Autonómica, Nacional	Autonómica 12 años / nacional 2 años	2020-2021	Categoría senior	Entre 1 y 2 partidos/semana	Grupo 2 y autonómica maxima categoria	Sí	No	Para mantener o desarrollar la resistencia aeróbica (natación, ciclismo, carrera, saltar a la comba, etc.)	Entre 30 y 45 minutos	2-3 días	Sí	5-7 minutos	No			Tiempo del descanso. Lo utilizo para comentar con el compañero.	Durante el calentamiento inicial, Al finalizar el partido
2021-10-01 22:18:25	Sí	2000-03-04	Hombre	180	73.5	Bizkaia	Regional/Autonómica, Nacional	Regional/Autonómica 4 años. Nacional (2 años	2020-2021	Categoría senior, Categorías inferiores	Entre 3 y 4 partidos/semana	Grupo 3	Sí	No	Para mantener o desarrollar la resistencia aeróbica (natación, ciclismo, carrera, saltar a la comba, etc.), Para mantener o desarrollar la fuerza muscular (diferentes técnicas de fortalecimiento muscular con máquinas, con peso libre, con el propio peso corporal, con gomas elásticas, etc.)	Más de 60 minutos	6-7 días	No		No			Utilizo el descanso para hablar sobre situaciones de partido.	Durante el calentamiento inicial, Durante el descanso entre mitades
2021-10-01 22:29:24	Sí	1988-04-03	Hombre	173	67	Madrid	Local, Regional/Autonómica, Nacional, Internacional	Local (1 año), regional/autónomica (4 años), nacional (10 años), internacional (8 años)	2020-2021	Categoría senior	Entre 1 y 2 partidos/semana	GRUPO 1 FEB, FIBA	Sí	No	Para mantener o desarrollar la resistencia aeróbica (natación, ciclismo, carrera, saltar a la comba, etc.), Para mantener o desarrollar la fuerza muscular (diferentes técnicas de fortalecimiento muscular con máquinas, con peso libre, con el propio peso corporal, con gomas elásticas, etc.), Para mantener o desarrollar la velocidad (capacidad de realizar sprints en el menor tiempo posible y de repe…	Entre 30 y 45 minutos	4-5 días	Sí	8-10 minutos	No				Durante el calentamiento inicial, Al finalizar el partido
2021-10-01 22:39:41	Sí	1988-07-30	Mujer	165	60	Chiclana de la Frontera, Cádiz	Nacional	Local (2 años); Autonómica (3 años); Nacional (3 años)	2020-2021	Categoría senior	Entre 1 y 2 partidos/semana	Local; Feb grupo 3	Sí	No	Para mantener o desarrollar la resistencia aeróbica (natación, ciclismo, carrera, saltar a la comba, etc.), Para mantener o desarrollar la fuerza muscular (diferentes técnicas de fortalecimiento muscular con máquinas, con peso libre, con el propio peso corporal, con gomas elásticas, etc.)	Entre 30 y 45 minutos	2-3 días	Sí	6-8	No			No me lo he planteado nunca	Durante el calentamiento inicial		A little confusing the questions about the seasons. I did not know what information could be more useful or what season it was better to answer. Good luck and thanks!
2021-10-01 22:43:23	Sí	1995-10-19	Hombre	1'82	76	Tarragona	Nacional	Nacional (2 años)	2020-2021	Categoría senior	Entre 1 y 2 partidos/semana	Grupo 3	Sí	No	Para mantener o desarrollar la resistencia aeróbica (natación, ciclismo, carrera, saltar a la comba, etc.), Para mantener o desarrollar la fuerza muscular (diferentes técnicas de fortalecimiento muscular con máquinas, con peso libre, con el propio peso corporal, con gomas elásticas, etc.), Para mantener o desarrollar la velocidad (capacidad de realizar sprints en el menor tiempo posible y de repe…	Más de 60 minutos	4-5 días	Sí	5 - 10 minutos	Sí	Estiramientos y movilidad articular, Técnicas de manejo de la respiración (activación/relajación, conciencia)	No enfriar el cuerpo		Durante el calentamiento inicial, Durante el descanso entre mitades, Al finalizar el partido
2021-10-01 22:43:47	Sí	1990-08-19	Hombre	186	93	Barcelona	Local, Regional/Autonómica, Nacional	Local y Regional 8 años. Nacional 1 año.	2018-2019	Categoría senior, Categorías inferiores	Entre 3 y 4 partidos/semana	1era Categoria Catalunya Masculina y Copa Catalunya Femenina.	Sí	No	Para mantener o desarrollar la resistencia aeróbica (natación, ciclismo, carrera, saltar a la comba, etc.), Para mantener o desarrollar la fuerza muscular (diferentes técnicas de fortalecimiento muscular con máquinas, con peso libre, con el propio peso corporal, con gomas elásticas, etc.), Para mantener o desarrollar la velocidad (capacidad de realizar sprints en el menor tiempo posible y de repe…	Más de 60 minutos	6-7 días	No	-	No		-	Creo que nunca he visto a un árbitro reactivarse tras el descanso y el hecho de no haberlo visto nunca, no me ha hecho plantearme el hacerlo. Ahora al leer esto, pienso que quizás sería una buena opción para estar al 100% al inicio del 3er cuarto.	Durante el calentamiento inicial
2021-10-01 23:05:35	Sí	1991-07-08	Hombre	1.80	66	San Fernando (Cádiz)	Nacional	Local (1) autonómica (3) nacional (7)	2019-2020	Categoría senior	Entre 1 y 2 partidos/semana	Feb grupo 3	Sí	No	Para mantener o desarrollar la fuerza muscular (diferentes técnicas de fortalecimiento muscular con máquinas, con peso libre, con el propio peso corporal, con gomas elásticas, etc.)	Entre 45 y 60 minutos	4-5 días	Sí	5-10 minutos	No			Lo utilizo para bajar pulsaciones y descansar	Durante el calentamiento inicial
2021-10-01 23:50:05	Sí	1995-07-21	Hombre	189	87	Barcelona	Local, Regional/Autonómica	Local (9 años), regional/autonómica (6 años), nacional (1 año)	2018-2019	Categoría senior	Entre 4 y 5 partidos/semana	Nacional y regional	Sí	Sí	Para mantener o desarrollar la resistencia aeróbica (natación, ciclismo, carrera, saltar a la comba, etc.), Para mantener o desarrollar la fuerza muscular (diferentes técnicas de fortalecimiento muscular con máquinas, con peso libre, con el propio peso corporal, con gomas elásticas, etc.), Para mantener o desarrollar la velocidad (capacidad de realizar sprints en el menor tiempo posible y de repe…	Más de 60 minutos	4-5 días	Sí	10-12 minutos	No			Cuando la media parte es de 10 minutos no considero que sea estrictamente necesario reactivarse	Durante el calentamiento inicial
2021-10-02 00:13:26	Sí	1963-08-13	Hombre	185	80	Granada	Nacional	Nacional (34años)	2018-2019	Categoría senior	Entre 1 y 2 partidos/semana	Feb grupo1	Sí	No	Para mantener o desarrollar la resistencia aeróbica (natación, ciclismo, carrera, saltar a la comba, etc.), Para mantener o desarrollar la fuerza muscular (diferentes técnicas de fortalecimiento muscular con máquinas, con peso libre, con el propio peso corporal, con gomas elásticas, etc.), Para mantener o desarrollar la velocidad (capacidad de realizar sprints en el menor tiempo posible y de repe…	Entre 45 y 60 minutos	2-3 días	Sí	10-12 minutos aprox	Sí	Estiramientos y movilidad articular	Me sirve mentalmente pqra la segunda parte del partido		Durante el descanso entre mitades, Al finalizar el partido		It has been a pleasure to participate in this survey
2021-10-02 00:24:26	Sí	1995-04-04	Hombre	174	71	Salamanca	Local, Regional/Autonómica, Nacional	Local (11 años) regional/autonómica (6) nacional (3)	2018-2019	Categoría senior, Categorías inferiores	Entre 1 y 2 partidos/semana	2018-2019 Grupo 3	Sí	No	Para mantener o desarrollar la resistencia aeróbica (natación, ciclismo, carrera, saltar a la comba, etc.), Para mantener o desarrollar la fuerza muscular (diferentes técnicas de fortalecimiento muscular con máquinas, con peso libre, con el propio peso corporal, con gomas elásticas, etc.), Para mantener o desarrollar la velocidad (capacidad de realizar sprints en el menor tiempo posible y de repe…	Más de 60 minutos	4-5 días	Sí	5-10 minutos	Sí	Estiramientos y movilidad articular	Para entrar activo y concentrado a la pista		Durante el calentamiento inicial, Durante el descanso entre mitades, Al finalizar el partido
2021-10-02 01:31:13	Sí	1991-11-30	Hombre	190	90	Murcia	Regional/Autonómica, Nacional	Regional (13 años) Nacional (5 años)	2020-2021	Categoría senior, Categorías inferiores	Entre 3 y 4 partidos/semana	Grupo 3 (liga EBA y liga femenina 2)	Sí	No	Para mantener o desarrollar la resistencia aeróbica (natación, ciclismo, carrera, saltar a la comba, etc.), Para mantener o desarrollar la fuerza muscular (diferentes técnicas de fortalecimiento muscular con máquinas, con peso libre, con el propio peso corporal, con gomas elásticas, etc.), Para mantener o desarrollar la velocidad (capacidad de realizar sprints en el menor tiempo posible y de repe…	Entre 30 y 45 minutos	4-5 días	Sí	5 minutos	No			Entiendo que mi cuerpo sigue estando activo tras 10 minutos de descanso	Durante el calentamiento inicial
2021-10-02 01:50:39	Sí	1991-12-02	Hombre	178	72	ALMERÍA, ALMERÍA	Nacional	Local 11 años, Regional 6 años, nacional 3 años	2020-2021	Categoría senior	Entre 1 y 2 partidos/semana	FEB, grupo 3	Sí	No	Para mantener o desarrollar la resistencia aeróbica (natación, ciclismo, carrera, saltar a la comba, etc.), Para mantener o desarrollar la fuerza muscular (diferentes técnicas de fortalecimiento muscular con máquinas, con peso libre, con el propio peso corporal, con gomas elásticas, etc.), Para mantener o desarrollar la velocidad (capacidad de realizar sprints en el menor tiempo posible y de repe…	Entre 45 y 60 minutos	4-5 días	Sí	10 - 15 minutos	Sí	Trotar o correr, Estiramientos y movilidad articular	Para salir a pista con las pulsaciones altas de nuevo.		Durante el calentamiento inicial, Al finalizar el partido		Thank you
2021-10-02 08:56:09	Sí	1991-01-28	Hombre	189	85	Torrejón de Ardoz	Regional/Autonómica, Nacional	regional/autonomica (6 años), nacional (6 años)	2020-2021	Categoría senior	1 partido/semana	Grupo 1 FEB	Sí	No	Para mantener o desarrollar la resistencia aeróbica (natación, ciclismo, carrera, saltar a la comba, etc.), Para mantener o desarrollar la fuerza muscular (diferentes técnicas de fortalecimiento muscular con máquinas, con peso libre, con el propio peso corporal, con gomas elásticas, etc.)	Entre 45 y 60 minutos	2-3 días	Sí	5-10 minutos	No			nunca le he realizado (rutina)	Durante el calentamiento inicial
2021-10-02 09:15:13	Sí	1990-07-05	Hombre	180	75	Beniarjo (VALENCIA)	Local, Regional/Autonómica, Nacional	local (12 años) Autonómica (11 años) Nacional (5 años)	2020-2021	Categoría senior, Categorías inferiores	Entre 4 y 5 partidos/semana	Grupo 3	Sí	No	Para mantener o desarrollar la resistencia aeróbica (natación, ciclismo, carrera, saltar a la comba, etc.), Para mantener o desarrollar la fuerza muscular (diferentes técnicas de fortalecimiento muscular con máquinas, con peso libre, con el propio peso corporal, con gomas elásticas, etc.)	Entre 45 y 60 minutos	4-5 días	Sí	10-15 minutos	No			por tiempo	Durante el calentamiento inicial, Al finalizar el partido
2021-10-02 10:11:23	Sí	1988-04-08	Hombre	179	86	Barcelona	Nacional	Autonómica (15 años), Nacional (4 años)	2018-2019	Categoría senior	Entre 1 y 2 partidos/semana	Grupo 2 FEB	Sí	Sí	Para mantener o desarrollar la fuerza muscular (diferentes técnicas de fortalecimiento muscular con máquinas, con peso libre, con el propio peso corporal, con gomas elásticas, etc.), Para mantener o desarrollar otras capacidades (coordinación, equilibrio, agilidad)	Entre 45 y 60 minutos	2-3 días	Sí	15 minutos	Sí	Estiramientos y movilidad articular, Técnicas de manejo de la respiración (activación/relajación, conciencia)	El motivo principal es salir concentrado al 100% y prevenir lesiones		Durante el calentamiento inicial, Durante el descanso entre mitades, Al finalizar el partido
2021-10-02 10:20:17	Sí	1994-12-05	Hombre	185	75	Murcia	Local, Regional/Autonómica, Nacional	Local 5 regional 3 nacional 1	2018-2019	Categoría senior	Entre 3 y 4 partidos/semana	1 division	Sí	No	Para mantener o desarrollar la resistencia aeróbica (natación, ciclismo, carrera, saltar a la comba, etc.)	Entre 45 y 60 minutos	2-3 días	Sí	3 a 5 min	No				Nunca
2021-10-02 11:17:45	Sí	1988-06-06	Hombre	180	85	Barcelona	Nacional	Local 16 años, autonomica 14 años, nacional 6 años, internacional sin exp.	2019-2020	Categoría senior, Categorías inferiores	Entre 2 y 3 partidos/semana	FEB G3, autonomica (19/20)	Sí	No	Para mantener o desarrollar la resistencia aeróbica (natación, ciclismo, carrera, saltar a la comba, etc.), Para mantener o desarrollar la fuerza muscular (diferentes técnicas de fortalecimiento muscular con máquinas, con peso libre, con el propio peso corporal, con gomas elásticas, etc.), Para mantener o desarrollar la velocidad (capacidad de realizar sprints en el menor tiempo posible y de repe…	Entre 45 y 60 minutos	4-5 días	Sí		No	Trotar o correr		poco tiempo	Durante el calentamiento inicial
2021-10-02 11:36:53	Sí	1976-03-29	Hombre	1.79	81	Málaga	Local	7 años	2019-2020	Categorías inferiores	Entre 2 y 3 partidos/semana	Provincial	Sí	No	Para mantener o desarrollar la resistencia aeróbica (natación, ciclismo, carrera, saltar a la comba, etc.)	Más de 60 minutos	6-7 días	Sí	5 minutos	Sí	Estiramientos y movilidad articular	para evitar el enfriamiento		Durante el calentamiento inicial, Durante el descanso entre mitades
2021-10-02 11:39:19	Sí	1991-08-11	Hombre	185	90	Madrid	Nacional	Local 4 años, autonómica 3 años, nacional 7	2019-2020	Categoría senior	Entre 2 y 3 partidos/semana	FEB grupo 3 (EBA)	Sí	No	Para mantener o desarrollar la resistencia aeróbica (natación, ciclismo, carrera, saltar a la comba, etc.), Para mantener o desarrollar la fuerza muscular (diferentes técnicas de fortalecimiento muscular con máquinas, con peso libre, con el propio peso corporal, con gomas elásticas, etc.), Para mantener o desarrollar la velocidad (capacidad de realizar sprints en el menor tiempo posible y de repe…	Entre 30 y 45 minutos	2-3 días	Sí	5-10 minutos	No			Físicamente me encuentro activo, en la primera carrera vuelvo a encontrar sensaciones.	Durante el calentamiento inicial, Al finalizar el partido
2021-10-02 12:07:14	Sí	1989-10-26	Hombre	183	80	Marchamalo, Guadalajara	Nacional	7 años	2020-2021	Categoría senior	1 partido/semana	Grupo 3	Sí	Sí	Para mantener o desarrollar la resistencia aeróbica (natación, ciclismo, carrera, saltar a la comba, etc.)	Entre 45 y 60 minutos	2-3 días	Sí	10 minutos	No				Durante el calentamiento inicial
2021-10-02 13:52:20	Sí	1996-08-24	Hombre	171	65	Palma de mallorca, baleares	Local, Regional/Autonómica, Nacional	7,7,3, sin experiencia	2020-2021	Categoría senior	Entre 3 y 4 partidos/semana	3	Sí	No	Para mantener o desarrollar la resistencia aeróbica (natación, ciclismo, carrera, saltar a la comba, etc.), Para mantener o desarrollar la fuerza muscular (diferentes técnicas de fortalecimiento muscular con máquinas, con peso libre, con el propio peso corporal, con gomas elásticas, etc.)	Entre 30 y 45 minutos	2-3 días	Sí	5-10	Sí	Técnicas de manejo de la respiración (activación/relajación, conciencia)	Empezar concentrado		Durante el calentamiento inicial, Al finalizar el partido
2021-10-03 08:49:24	Sí	1997-03-25	Hombre	174	71	Alicante	Local, Regional/Autonómica, Nacional	Local (1año) Autonómica (3años) Nacional(1año) Internacional(0años)	2020-2021	Categoría senior	Entre 6 y 7 partidos semana	Grupo 3 FEB	Sí	Sí	Para mantener o desarrollar la resistencia aeróbica (natación, ciclismo, carrera, saltar a la comba, etc.), Para mantener o desarrollar la fuerza muscular (diferentes técnicas de fortalecimiento muscular con máquinas, con peso libre, con el propio peso corporal, con gomas elásticas, etc.), Para mantener o desarrollar la velocidad (capacidad de realizar sprints en el menor tiempo posible y de repe…	Más de 60 minutos	4-5 días	Sí	10 minutos	Sí	Trotar o correr, Ejercicios de coordinación y equilibrio, Técnicas de manejo de la respiración (activación/relajación, conciencia)	Para salir activo de mente y cuerpo y poder dar el máximo rendimiento posible.		Durante el calentamiento inicial, Durante el descanso entre mitades, Al finalizar el partido
2021-10-03 12:21:31	Sí	1989-04-08	Mujer	1.75	68	Barcelona	Regional/Autonómica	14	17-18	Categoría senior, Categorías inferiores	Entre 4 y 5 partidos/semana	NACIONAL	Sí	No	Para mantener o desarrollar la resistencia aeróbica (natación, ciclismo, carrera, saltar a la comba, etc.), Para mantener o desarrollar la fuerza muscular (diferentes técnicas de fortalecimiento muscular con máquinas, con peso libre, con el propio peso corporal, con gomas elásticas, etc.), Para mantener o desarrollar la flexibilidad (ya sea con el propio cuerpo, ayuda de otra persona, o con eleme…	Entre 45 y 60 minutos	2-3 días	Sí	10min	No			Charla con el compañero sobre el partido, trayecto vestuario-pista/pista-vestuario	Durante el calentamiento inicial, Al finalizar el partido
2021-10-03 13:14:58	Sí	1989-02-08	Hombre	182	80	Badajoz	Local, Regional/Autonómica, Nacional	Local (21 años), Regional/Autonómica (15 años), Nacional (13 años)	2018-2019	Categoría senior, Categorías inferiores	Entre 4 y 5 partidos/semana	FEB (Grupo 3)	Sí	No	Para mantener o desarrollar la resistencia aeróbica (natación, ciclismo, carrera, saltar a la comba, etc.), Para mantener o desarrollar la fuerza muscular (diferentes técnicas de fortalecimiento muscular con máquinas, con peso libre, con el propio peso corporal, con gomas elásticas, etc.)	Más de 60 minutos	4-5 días	Sí	10-15 minutos	Sí	Estiramientos y movilidad articular	Precisamente la “reactivación”, aún queda trabajo por hacer y no puedo “desconectar” para volver a empezar de 0.		Durante el calentamiento inicial, Durante el descanso entre mitades, Al finalizar el partido
2021-10-03 16:53:32	Sí	1982-11-03	Hombre	1,81cm	78	Zaragoza	Local, Regional/Autonómica, Nacional	10 años en federación aragonesa (local / autonómica ) 2años el FEB (nacional )	2020-2021	Categoría senior, Categorías inferiores	Entre 3 y 4 partidos/semana	Actualmente G3 (liga Eba y LF2)	Sí	Sí	Para mantener o desarrollar la fuerza muscular (diferentes técnicas de fortalecimiento muscular con máquinas, con peso libre, con el propio peso corporal, con gomas elásticas, etc.)	Entre 45 y 60 minutos	4-5 días	No		No			Necesito 5 min de concentración en lo q está sucediendo en la pista ( mi preparación física es una trabajo constante y semanal )	Al finalizar el partido
2021-10-03 21:32:48	Sí	1989-08-04	Hombre	178	75	Lloret de mar (Girona)	Regional/Autonómica, Nacional	Regional: 8 años/ 1a Autonómica: 5 años / Nacional: 1r año	2019-2020	Categoría senior	Entre 3 y 4 partidos/semana	1a Autonómica	Sí	No	Para mantener o desarrollar la resistencia aeróbica (natación, ciclismo, carrera, saltar a la comba, etc.), Para mantener o desarrollar la fuerza muscular (diferentes técnicas de fortalecimiento muscular con máquinas, con peso libre, con el propio peso corporal, con gomas elásticas, etc.)	Entre 45 y 60 minutos	4-5 días	Sí	10 - 15 minutos	No			Si no me siento cargado físicamente no lo suelo hacer.	Durante el calentamiento inicial, Al finalizar el partido
2021-10-03 22:19:55	Sí	1994-08-04	Mujer	164	57	Sevilla	Regional/Autonómica, Nacional	Autonómica (5 años) nacional (2 años)	2018-2019	Categoría senior, Categorías inferiores	Entre 5 y 6 partidos semana	Autonómica	Sí	No	Para mantener o desarrollar la resistencia aeróbica (natación, ciclismo, carrera, saltar a la comba, etc.), Para mantener o desarrollar la fuerza muscular (diferentes técnicas de fortalecimiento muscular con máquinas, con peso libre, con el propio peso corporal, con gomas elásticas, etc.)	Entre 45 y 60 minutos	4-5 días	Sí	10-15 min	No			Vamos a vestuario, Comentas aspectos del partido con el compañero y final apenas queda tiempo para dar un par de sprint	Durante el calentamiento inicial, Al finalizar el partido
2021-10-03 22:39:56	Sí	1996-11-21	Hombre	180	85	Sabra Cruz de Tenerife	Local, Regional/Autonómica, Nacional	Local (2 años), autonómica (3 años), nacional (4 años)	2020-2021	Categoría senior	1 partido/semana	GRUPO 2 FEB	Sí	Sí	Para mantener o desarrollar la resistencia aeróbica (natación, ciclismo, carrera, saltar a la comba, etc.), Para mantener o desarrollar la fuerza muscular (diferentes técnicas de fortalecimiento muscular con máquinas, con peso libre, con el propio peso corporal, con gomas elásticas, etc.), Para mantener o desarrollar otras capacidades (coordinación, equilibrio, agilidad)	Entre 45 y 60 minutos	2-3 días	No		No			No lo había pensado nunca	Durante el calentamiento inicial, Al finalizar el partido
2021-10-03 23:51:23	Sí	1974-08-21	Hombre	187	81	Canillo(Andorra)	Regional/Autonómica, Nacional, Internacional	Regional autonómica(4 años), Nacional (29 años), internacional(10 años)	2018-2019	Categoría senior	Entre 1 y 2 partidos/semana	FEB grupo 1	Sí	No	Para mantener o desarrollar la resistencia aeróbica (natación, ciclismo, carrera, saltar a la comba, etc.), Para mantener o desarrollar la velocidad (capacidad de realizar sprints en el menor tiempo posible y de repetirlos el mayor número de veces), Para mantener o desarrollar la flexibilidad (ya sea con el propio cuerpo, ayuda de otra persona, o con elementos como toallas, gomas elásticas, foam …	Entre 45 y 60 minutos	2-3 días	No		No				Durante el calentamiento inicial, Al finalizar el partido
2021-10-04 01:53:00	Sí	1986-06-13	Hombre	188	87	Madrid	Regional/Autonómica, Nacional	Regional/autonómica (5 años) nacional (4 años)	2020-2021	Categoría senior	Entre 1 y 2 partidos/semana	FEB grupo 1	Sí	No	Para mantener o desarrollar la resistencia aeróbica (natación, ciclismo, carrera, saltar a la comba, etc.), Para mantener o desarrollar la fuerza muscular (diferentes técnicas de fortalecimiento muscular con máquinas, con peso libre, con el propio peso corporal, con gomas elásticas, etc.)	Más de 60 minutos	4-5 días	Sí	5-10	No			Aprovecho para descansar mentalmente y compartir impresiones con mis compañeros más que una activación física, más allá de un "pequeño sprint" para ir a la zona que ocupo al inicio del tercer periodo	Durante el calentamiento inicial
2021-10-04 08:57:41	Sí	1990-05-18	Mujer	180	68	Zaragoza	Nacional	Regional 3, nacional 5	2020-2021	Categoría senior	1 partido/semana	Grupo 1	Sí	No	Para mantener o desarrollar la resistencia aeróbica (natación, ciclismo, carrera, saltar a la comba, etc.), Para mantener o desarrollar la fuerza muscular (diferentes técnicas de fortalecimiento muscular con máquinas, con peso libre, con el propio peso corporal, con gomas elásticas, etc.)	Entre 30 y 45 minutos	2-3 días	No		No			No me lo he planteado nunca, no he sentido la necesidad de hacerlo.	Durante el calentamiento inicial, Al finalizar el partido
2021-10-04 11:54:03	Sí	1984-11-09	Hombre	190	88	Barcelona	Local, Regional/Autonómica, Nacional	regional/autonómica (6 años), nacional (4 años), internacional (sin experiencia)	2020-2021	Categoría senior, Categorías inferiores	Entre 2 y 3 partidos/semana	Grupo 3 FEB (LIGA EBA Y LIGA FEMENINA 2)	Sí	No	Para mantener o desarrollar la resistencia aeróbica (natación, ciclismo, carrera, saltar a la comba, etc.), Para mantener o desarrollar la fuerza muscular (diferentes técnicas de fortalecimiento muscular con máquinas, con peso libre, con el propio peso corporal, con gomas elásticas, etc.)	Entre 15 y 30 minutos	2-3 días	Sí	Entre 5 y 10 minutos	No			No tengo la costumbre de hacerlo.	Durante el calentamiento inicial, Al finalizar el partido
2021-10-04 12:40:59	Sí	1974-07-22	Hombre	175	75	Castro Urdiales	Nacional	20	2020-2021	Categoría senior	1 partido/semana	Grupo 1	Sí	No	Para mantener o desarrollar la resistencia aeróbica (natación, ciclismo, carrera, saltar a la comba, etc.)	Entre 30 y 45 minutos	2-3 días	Sí	5 minutos	No			Falta de costumbre	Durante el calentamiento inicial
2021-10-04 12:51:01	Sí	2021-09-12	Hombre	178	70	Soria	Nacional	Local (15 años) Regional (10 años) nacional (7 años)	2019-2020	Categoría senior, Categorías inferiores	Entre 1 y 2 partidos/semana	Feb grupo 2 + auntonomica	Sí	No	Para mantener o desarrollar la resistencia aeróbica (natación, ciclismo, carrera, saltar a la comba, etc.), Para mantener o desarrollar la velocidad (capacidad de realizar sprints en el menor tiempo posible y de repetirlos el mayor número de veces)	Entre 45 y 60 minutos	2-3 días	Sí	10 minutos	Sí	Otras	Necesidad de activarse de nuevo		Durante el calentamiento inicial, Al finalizar el partido
2021-10-04 13:43:23	Sí	1998-12-15	Hombre	185	79.5	Zaragoza	Regional/Autonómica, Nacional	Autonómico 8 años y nacional 3 años	2020-2021	Categoría senior	1 partido/semana	Grupo 3 Feb	Sí	No	Para mantener o desarrollar la resistencia aeróbica (natación, ciclismo, carrera, saltar a la comba, etc.), Para mantener o desarrollar la fuerza muscular (diferentes técnicas de fortalecimiento muscular con máquinas, con peso libre, con el propio peso corporal, con gomas elásticas, etc.), Para mantener o desarrollar otras capacidades (coordinación, equilibrio, agilidad)	Más de 60 minutos	4-5 días	Sí	10 minutos	No			Estoy centrado en hablar con el compañero.	Durante el calentamiento inicial, Al finalizar el partido
2021-10-04 17:08:58	Sí	1994-12-02	Mujer	1.7	65	Barcelona	Local, Regional/Autonómica, Nacional, Internacional	Local/Regional (10 años) Nacional (5 años) Internacional (1 año)	2020-2021	Categoría senior	Entre 1 y 2 partidos/semana	Grupo 1 FEB	Sí	Sí	Para mantener o desarrollar la fuerza muscular (diferentes técnicas de fortalecimiento muscular con máquinas, con peso libre, con el propio peso corporal, con gomas elásticas, etc.), Para mantener o desarrollar la velocidad (capacidad de realizar sprints en el menor tiempo posible y de repetirlos el mayor número de veces), Para mantener o desarrollar la flexibilidad (ya sea con el propio cuerpo, …	Entre 45 y 60 minutos	4-5 días	Sí	10-15 minutos	No			No sabría que ejercicios realizar para activarme. Noto que es necesario pero desconozco que debería de hacer.	Durante el calentamiento inicial, Al finalizar el partido
2021-10-04 17:27:09	Sí	1995-01-15	Hombre	185	86	Barcelona, Barcelona	Local, Regional/Autonómica, Nacional	Local (4 años), autonomica (3años), nacional (5 años)	2019-2020	Categoría senior	Entre 1 y 2 partidos/semana	Feb, g1	Sí	No	Para mantener o desarrollar la fuerza muscular (diferentes técnicas de fortalecimiento muscular con máquinas, con peso libre, con el propio peso corporal, con gomas elásticas, etc.), Para mantener o desarrollar la flexibilidad (ya sea con el propio cuerpo, ayuda de otra persona, o con elementos como toallas, gomas elásticas, foam roller, etc.)	Más de 60 minutos	4-5 días	Sí	5-7minutos	No			Rutina	Al finalizar el partido
2021-10-04 17:32:51	Sí	1993-11-30	Hombre	192	75	Gijón (Asturias)	Local, Regional/Autonómica, Nacional	Local y Regional/Automático (11años) Nacional (6 años)	2019-2020	Categoría senior, Categorías inferiores	Entre 2 y 3 partidos/semana	Liga Femenina Endesa y LEB ORO	Sí	Sí	Para mantener o desarrollar la resistencia aeróbica (natación, ciclismo, carrera, saltar a la comba, etc.), Para mantener o desarrollar la fuerza muscular (diferentes técnicas de fortalecimiento muscular con máquinas, con peso libre, con el propio peso corporal, con gomas elásticas, etc.), Para mantener o desarrollar la velocidad (capacidad de realizar sprints en el menor tiempo posible y de repe…	Entre 45 y 60 minutos	2-3 días	Sí	10 minutos aproximadamente	Sí	Estiramientos y movilidad articular	Para estar activo desde el primer segundo.		Durante el calentamiento inicial, Durante el descanso entre mitades, Al finalizar el partido
2021-10-04 19:14:51	Sí	1989-07-31	Hombre	173	70	Barcelona	Nacional	Autonómica (10 años), Nacional (2años), internacional (sin experiencia)	2019-2020	Categoría senior	Entre 2 y 3 partidos/semana	Grupo 3	Sí	No	Para mantener o desarrollar la resistencia aeróbica (natación, ciclismo, carrera, saltar a la comba, etc.), Para mantener o desarrollar la fuerza muscular (diferentes técnicas de fortalecimiento muscular con máquinas, con peso libre, con el propio peso corporal, con gomas elásticas, etc.)	Más de 60 minutos	4-5 días	No		No			No lo había tenido en cuenta	Durante el calentamiento inicial
2021-10-04 19:28:05	Sí	1991-06-02	Hombre	177	69	Guadix - Granada	Local, Regional/Autonómica, Nacional	5 Local / 1 Autonómico / 5 Nacional	2018-2019	Categoría senior	Entre 1 y 2 partidos/semana	Grupo 3	Sí	No	Para mantener o desarrollar la resistencia aeróbica (natación, ciclismo, carrera, saltar a la comba, etc.), Para mantener o desarrollar la fuerza muscular (diferentes técnicas de fortalecimiento muscular con máquinas, con peso libre, con el propio peso corporal, con gomas elásticas, etc.), Para mantener o desarrollar la flexibilidad (ya sea con el propio cuerpo, ayuda de otra persona, o con eleme…	Más de 60 minutos	4-5 días	Sí	Entre 10 y 15 minutos	Sí	Trotar o correr, Estiramientos y movilidad articular, Ejercicios de coordinación y equilibrio			Durante el descanso entre mitades, Al finalizar el partido
2021-10-04 21:33:11	Sí	1986-12-06	Hombre	185	80	Miranda de ebro, burgos	Nacional	Local (1año) regional (3 años) nacional (11 años)	2019-2020	Categoría senior	Entre 2 y 3 partidos/semana	Grupo 1 Feb	Sí	No	Para mantener o desarrollar la resistencia aeróbica (natación, ciclismo, carrera, saltar a la comba, etc.), Para mantener o desarrollar la fuerza muscular (diferentes técnicas de fortalecimiento muscular con máquinas, con peso libre, con el propio peso corporal, con gomas elásticas, etc.), Para mantener o desarrollar la flexibilidad (ya sea con el propio cuerpo, ayuda de otra persona, o con eleme…	Entre 45 y 60 minutos	4-5 días	Sí	5-10min	Sí	Estiramientos y movilidad articular	No quedarme frio tras un parón tan radical durante algo mas de 15min		Durante el descanso entre mitades, Al finalizar el partido
2021-10-04 22:26:19	Sí	1992-01-20	Hombre	185	80	Madrid	Local, Regional/Autonómica, Nacional	Local y Regional/Autonómica (15 años), Nacional (7años)	2018-2019	Categoría senior	Entre 3 y 4 partidos/semana	Grupo 2 (EBA y LF2)	Sí	No	Para mantener o desarrollar la fuerza muscular (diferentes técnicas de fortalecimiento muscular con máquinas, con peso libre, con el propio peso corporal, con gomas elásticas, etc.)	Entre 45 y 60 minutos	4-5 días	No		No			Doy preferencia a la reactivación mental, no perder la concentración, el aspecto físico pasa a un segundo plano.	Al finalizar el partido
2021-10-04 23:02:15	Sí	1982-01-05	Hombre	179	86.5	Valladolid	Local, Regional/Autonómica, Nacional	26 años arbitrando (3 escuela,3 autonómico, 5 primera nacional y los 15 últimos EBA	2019-2020	Categoría senior, Categorías inferiores	Entre 2 y 3 partidos/semana	Grupo 3 liga EBA	Sí	No	Para mantener o desarrollar la resistencia aeróbica (natación, ciclismo, carrera, saltar a la comba, etc.), Para mantener o desarrollar la velocidad (capacidad de realizar sprints en el menor tiempo posible y de repetirlos el mayor número de veces)	Entre 45 y 60 minutos	2-3 días	No		No			Falta de tiempo y de costumbre	Durante el calentamiento inicial, En el descanso entre tercer y último cuarto, Al finalizar el partido
2021-10-05 15:32:55	Sí	1991-05-14	Hombre	184	84	SALAMANCA	Nacional	Local - 1, Autonómico - 8, Nacional - 4	2019-2020	Categoría senior, Categorías inferiores	Entre 3 y 4 partidos/semana	FEB grupo 3, autonómica y 1 división femenina	Sí	No	Para mantener o desarrollar la resistencia aeróbica (natación, ciclismo, carrera, saltar a la comba, etc.), Para mantener o desarrollar la fuerza muscular (diferentes técnicas de fortalecimiento muscular con máquinas, con peso libre, con el propio peso corporal, con gomas elásticas, etc.)	Más de 60 minutos	4-5 días	Sí	10 minutos	No			Porque no lo tengo en cuenta, a día de hoy (y pasadas temporadas) estoy bien físicamente, no necesito reactivación. Y al igual que los jugadores también descansan, considero correcto que los árbitros en esos 10 min también lo hagan	Durante el calentamiento inicial, Al finalizar el partido
2021-10-05 17:09:38	Sí	1989-01-21	Hombre	175	91	Armilla, Granada	Local, Regional/Autonómica	Local 13, autonómica 10	2019-2020	Categoría senior, Categorías inferiores	Entre 5 y 6 partidos semana	Provincial	Sí	No	Para mantener o desarrollar la resistencia aeróbica (natación, ciclismo, carrera, saltar a la comba, etc.), Para mantener o desarrollar la fuerza muscular (diferentes técnicas de fortalecimiento muscular con máquinas, con peso libre, con el propio peso corporal, con gomas elásticas, etc.)	Entre 45 y 60 minutos	2-3 días	Sí	10-15 min	No			Falta de rutina/tiempo en algunas ocasiones	Durante el calentamiento inicial, Al finalizar el partido
2021-10-05 21:22:28	Sí	1993-05-10	Hombre	176	73	Cádiz	Local, Regional/Autonómica, Nacional	Local y autonómico (12 años); Nacional (4 años)	2018-2019	Categoría senior	1 partido/semana	FEB grupo 2	Sí	No	Para mantener o desarrollar la resistencia aeróbica (natación, ciclismo, carrera, saltar a la comba, etc.), Para mantener o desarrollar la fuerza muscular (diferentes técnicas de fortalecimiento muscular con máquinas, con peso libre, con el propio peso corporal, con gomas elásticas, etc.)	Más de 60 minutos	4-5 días	Sí	3 minutos	No			Falta de tiempo	Durante el calentamiento inicial
2021-10-06 03:05:56	Sí	1995-10-21	Hombre	173	74	Las Palmas de Gran Canaria	Local, Regional/Autonómica, Nacional	Local (4 años) Autonómica (3 años) Nacional (1 año) Internacional (sin experiencia)	2018-2019	Categoría senior	Entre 5 y 6 partidos semana	Federación Autonómica Canaria	Sí	No	Para mantener o desarrollar la fuerza muscular (diferentes técnicas de fortalecimiento muscular con máquinas, con peso libre, con el propio peso corporal, con gomas elásticas, etc.), Para mantener o desarrollar la velocidad (capacidad de realizar sprints en el menor tiempo posible y de repetirlos el mayor número de veces)	Entre 45 y 60 minutos	4-5 días	Sí	5-10 minutos	Sí	Trotar o correr, Estiramientos y movilidad articular, Técnicas de manejo de la respiración (activación/relajación, conciencia)	Para no salir frío a la segunda mitad y que el cuerpo y la mente se mantengan activos y concentrados durante el descanso. Evitar la desconexión		Durante el calentamiento inicial, Durante el descanso entre mitades
2021-10-07 15:06:05	Sí	1994-10-26	Hombre	185	95	Valladolid	Local, Regional/Autonómica, Nacional	Local (9 años), autonómica (6 años), Nacional (1 año)	2020-2021	Categoría senior, Categorías inferiores	Entre 3 y 4 partidos/semana	Provincial, autonómica, primera nacional femenina	Sí	No	Para mantener o desarrollar la resistencia aeróbica (natación, ciclismo, carrera, saltar a la comba, etc.), Para mantener o desarrollar la fuerza muscular (diferentes técnicas de fortalecimiento muscular con máquinas, con peso libre, con el propio peso corporal, con gomas elásticas, etc.), Para mantener o desarrollar la velocidad (capacidad de realizar sprints en el menor tiempo posible y de repe…	Entre 45 y 60 minutos	4-5 días	Sí	5-10 minutos	No	Trotar o correr, Correr a máxima velocidad (esprintar), Estiramientos y movilidad articular		Tiempo necesario para realizar esa reactivación	Durante el calentamiento inicial
2021-10-07 15:06:28	Sí	1992-02-22	Hombre	200	96	PALENCIA, PALENCIA	Local, Regional/Autonómica	11 AÑOS LOCAL Y AUTONÓMICO	2020-2021	Categoría senior, Categorías inferiores	Entre 3 y 4 partidos/semana	AUTONÓMICA Y NACIONAL FEMENINA	Sí	Sí	Para mantener o desarrollar la resistencia aeróbica (natación, ciclismo, carrera, saltar a la comba, etc.), Para mantener o desarrollar la fuerza muscular (diferentes técnicas de fortalecimiento muscular con máquinas, con peso libre, con el propio peso corporal, con gomas elásticas, etc.), Para mantener o desarrollar la velocidad (capacidad de realizar sprints en el menor tiempo posible y de repe…	Entre 45 y 60 minutos	4-5 días	Sí	5–10 minutos.	Sí	Estiramientos y movilidad articular, Técnicas de manejo de la respiración (activación/relajación, conciencia)	Para no estar parado y poder volver al partido en las mejores condiciones.		Durante el calentamiento inicial, Durante el descanso entre mitades
2021-10-07 15:11:01	Sí	2003-02-01	Hombre	179	62	Burgos	Local, Regional/Autonómica, Nacional	Local (3 años) regional (3 años) nacional (2 años)	2019-2020	Categoría senior, Categorías inferiores	Entre 5 y 6 partidos semana	1°Nacional femenina	Sí	No	Para mantener o desarrollar la resistencia aeróbica (natación, ciclismo, carrera, saltar a la comba, etc.)	Entre 45 y 60 minutos	2-3 días	Sí	3 minutos	No			No hay casi tiempo	Durante el calentamiento inicial, Durante el descanso entre mitades, Al finalizar el partido
2021-10-07 15:11:42	Sí	1992-06-01	Hombre	193	83	Soria	Regional/Autonómica	Local (5 años), Regional/Autonómica (4 años)	2018-2019	Categorías inferiores	Entre 3 y 4 partidos/semana	Autonómica	Sí	No	Para mantener o desarrollar la resistencia aeróbica (natación, ciclismo, carrera, saltar a la comba, etc.), Para mantener o desarrollar la fuerza muscular (diferentes técnicas de fortalecimiento muscular con máquinas, con peso libre, con el propio peso corporal, con gomas elásticas, etc.), Para mantener o desarrollar la velocidad (capacidad de realizar sprints en el menor tiempo posible y de repe…	Más de 60 minutos	6-7 días	Sí	10-15 minutos	No			Período corto de tiempo (Menos de 10 minutos)	Durante el calentamiento inicial, Al finalizar el partido
2021-10-07 15:14:52	Sí	2000-05-16	Hombre	176	73	Valladolid	Local, Regional/Autonómica	Local (4 años) regional (1 año)	2018-2019	Categorías inferiores	Entre 2 y 3 partidos/semana	Liga escolar Valladolid	Sí	No	Para mantener o desarrollar la resistencia aeróbica (natación, ciclismo, carrera, saltar a la comba, etc.), Para mantener o desarrollar la fuerza muscular (diferentes técnicas de fortalecimiento muscular con máquinas, con peso libre, con el propio peso corporal, con gomas elásticas, etc.)	Más de 60 minutos	2-3 días	Sí	15-20 minutos	No	Trotar o correr, Correr a máxima velocidad (esprintar), Estiramientos y movilidad articular			Durante el calentamiento inicial, Al finalizar el partido
2021-10-07 15:16:29	Sí	1998-05-14	Hombre	186	80	Valladolid	Local, Regional/Autonómica, Nacional	Local 6, autonomico 4, nacional 2, internacional 0	2020-2021	Categoría senior, Categorías inferiores	Entre 4 y 5 partidos/semana	1a Femenina	Sí	No	Para mantener o desarrollar la resistencia aeróbica (natación, ciclismo, carrera, saltar a la comba, etc.), Para mantener o desarrollar la fuerza muscular (diferentes técnicas de fortalecimiento muscular con máquinas, con peso libre, con el propio peso corporal, con gomas elásticas, etc.)	Entre 45 y 60 minutos	6-7 días	Sí	3-5min	No			No hay necesidad	Durante el calentamiento inicial, Al finalizar el partido
2021-10-07 15:21:18	Sí	1977-01-17	Hombre	180	70	Valladolid	Local, Regional/Autonómica, Nacional	Local (5), auton (17), nacional (4)	2018-2019	Categoría senior	Entre 3 y 4 partidos/semana	CyL	Sí	Sí	Para mantener o desarrollar la resistencia aeróbica (natación, ciclismo, carrera, saltar a la comba, etc.), Para mantener o desarrollar la fuerza muscular (diferentes técnicas de fortalecimiento muscular con máquinas, con peso libre, con el propio peso corporal, con gomas elásticas, etc.), Para mantener o desarrollar la velocidad (capacidad de realizar sprints en el menor tiempo posible y de repe…	Más de 60 minutos	6-7 días	Sí	10-15	Sí	Técnicas de manejo de la respiración (activación/relajación, conciencia), Otras	Volver a subir el nivel de concentración		Durante el calentamiento inicial, Al finalizar el partido
2021-10-07 15:37:58	Sí	1983-03-10	Hombre	191	96	Valladolid	Local, Regional/Autonómica	Local 6 años Autonómica 5 años	2020-2021	Categoría senior, Categorías inferiores	Entre 2 y 3 partidos/semana	1 división femenina, de junior a infantil autonómico	Sí	No	Para mantener o desarrollar la resistencia aeróbica (natación, ciclismo, carrera, saltar a la comba, etc.)	Más de 60 minutos	2-3 días	No		Sí	Estiramientos y movilidad articular	Estiramientos		Durante el calentamiento inicial, Durante el descanso entre mitades
2021-10-07 16:19:02	Sí	1996-04-10	Hombre	183	65	Salamanca	Local, Regional/Autonómica	Local (7 años), Regional (4 años)	2018-2019	Categoría senior, Categorías inferiores	Entre 4 y 5 partidos/semana	Local y autonómico	Sí	No	Para mantener o desarrollar la resistencia aeróbica (natación, ciclismo, carrera, saltar a la comba, etc.), Para mantener o desarrollar la velocidad (capacidad de realizar sprints en el menor tiempo posible y de repetirlos el mayor número de veces)	Entre 45 y 60 minutos	2-3 días	Sí	7-10 minutos	No			Nunca me lo había planteado, puede que a partir de ahora lo haga.	Durante el calentamiento inicial, Al finalizar el partido
2021-10-07 16:33:09	Sí	1985-01-10	Hombre	1.92	90	Palencia	Local, Regional/Autonómica, Nacional	Local 8 años, autonomica 8 años, nacional 1 partido, internacional sin experiencia	2018-2019	Categorías inferiores	Entre 2 y 3 partidos/semana	Autonomica, 2018-2019	No					Sí	15 minutos	No			El motivo es analizar los 2 primeros tiempos	Durante el calentamiento inicial
2021-10-07 16:40:38	Sí	1996-07-11	Hombre	184	79	Salamanca	Regional/Autonómica, Nacional	10	2020-2021	Categoría senior	Entre 2 y 3 partidos/semana	Primera Masculina, Primera Femenina y Autonómica	Sí	No	Para mantener o desarrollar la resistencia aeróbica (natación, ciclismo, carrera, saltar a la comba, etc.), Para mantener o desarrollar la fuerza muscular (diferentes técnicas de fortalecimiento muscular con máquinas, con peso libre, con el propio peso corporal, con gomas elásticas, etc.), Para mantener o desarrollar la velocidad (capacidad de realizar sprints en el menor tiempo posible y de repe…	Más de 60 minutos	6-7 días	Sí	15-20 minutos	No				Durante el calentamiento inicial, Al finalizar el partido
2021-10-07 16:41:01	Sí	1995-04-17	Hombre	1.87	85	Palencia	Local, Regional/Autonómica	Local (4 años), regional/autonómica (3 años)	2019-2020	Categoría senior, Categorías inferiores	Entre 2 y 3 partidos/semana	1ª Nacional Masculina, 1ª Nacional Femenina, Categorías inferiores.	Sí	No	Para mantener o desarrollar la fuerza muscular (diferentes técnicas de fortalecimiento muscular con máquinas, con peso libre, con el propio peso corporal, con gomas elásticas, etc.), Para mantener o desarrollar la velocidad (capacidad de realizar sprints en el menor tiempo posible y de repetirlos el mayor número de veces), Para mantener o desarrollar la flexibilidad (ya sea con el propio cuerpo, …	Más de 60 minutos	4-5 días	Sí	De 5 a 8 min	Sí	Técnicas de manejo de la respiración (activación/relajación, conciencia)	Para no quedar afectado y que perjudique en mis decisiones.		Durante el calentamiento inicial
2021-10-07 17:49:47	Sí	2002-09-22	Hombre	183	81	Palencia	Regional/Autonómica	Regional/Autonómica (4 años)	2020-2021	Categoría senior	Entre 2 y 3 partidos/semana	Autonómico (2017-2019), 1ª Nacional Femenina y Autonómico (2019 - 2020) y 1ª Nacional Masculina y Femenina, así como autonómico (2020 - 2021)	No	No				Sí	10 minutos.	Sí	Trotar o correr, Estiramientos y movilidad articular	No entrar frío de nuevo en el encuentro tras el descanso. Los jugadores tienen su rueda calentamiento en el descanso: los árbitros hemos de tener la "nuestra".		Durante el calentamiento inicial, Durante el descanso entre mitades
2021-10-07 19:17:45	Sí	2002-01-25	Hombre	188	77	León	Local, Regional/Autonómica, Nacional	Local (4 años), Autonómico (3 años), Nacional(1 año), Internacional (sin experiencia)	2018-2019	Categorías inferiores	Entre 2 y 3 partidos/semana	En la temporada 2018-2019 arbitraba categorías inferiores desde alevin hasta junior	Sí	No	Para mantener o desarrollar la resistencia aeróbica (natación, ciclismo, carrera, saltar a la comba, etc.), Para mantener o desarrollar la fuerza muscular (diferentes técnicas de fortalecimiento muscular con máquinas, con peso libre, con el propio peso corporal, con gomas elásticas, etc.), Para mantener o desarrollar la velocidad (capacidad de realizar sprints en el menor tiempo posible y de repe…	Más de 60 minutos	4-5 días	Sí	Entre 10 y 15 minutos para calentar y activar el cuerpo para la actividad	Sí	Estiramientos y movilidad articular	Para no perder la activación del cuerpo y evitar posibles lesiones		Durante el calentamiento inicial, Durante el descanso entre mitades, Al finalizar el partido
2021-10-07 19:46:40	Sí	2001-06-22	Hombre	180	75	Valladolid	Local, Regional/Autonómica, Nacional	Local (5 años), regional (3 años), nacional (2 años), internacional ( sin experiencia)	2018-2019	Categorías inferiores	Entre 4 y 5 partidos/semana	AUTONOMICA JUVENIL	Sí	No	Para mantener o desarrollar la fuerza muscular (diferentes técnicas de fortalecimiento muscular con máquinas, con peso libre, con el propio peso corporal, con gomas elásticas, etc.), Para mantener o desarrollar la velocidad (capacidad de realizar sprints en el menor tiempo posible y de repetirlos el mayor número de veces)	Más de 60 minutos	2-3 días	Sí	5 - 7 minutos	No			No lo necesito	Durante el calentamiento inicial, Durante el descanso entre mitades
2021-10-07 19:49:47	Sí	2002-01-24	Hombre	1.81	75	Soria	Local, Regional/Autonómica, Nacional	Local (4 años), regional/autonómica (3 años), nacional (1 año)	2020-2021	Categorías inferiores	Entre 3 y 4 partidos/semana	Junior, cadete e infantil	Sí	No	Para mantener o desarrollar la resistencia aeróbica (natación, ciclismo, carrera, saltar a la comba, etc.), Para mantener o desarrollar la fuerza muscular (diferentes técnicas de fortalecimiento muscular con máquinas, con peso libre, con el propio peso corporal, con gomas elásticas, etc.)	Entre 45 y 60 minutos	4-5 días	No		No			El ejercicio físico requerido para arbitrar no me parece demasiado, por lo que no suelo ni calentar ni reactivarme en el descanso	Al finalizar el partido
2021-10-07 19:53:55	Sí	2001-01-08	Hombre	180	84	La Bañeza	Local, Regional/Autonómica	3	2018-2019	Categoría senior, Categorías inferiores	Entre 2 y 3 partidos/semana	Autonomico	Sí	No	Para mantener o desarrollar la fuerza muscular (diferentes técnicas de fortalecimiento muscular con máquinas, con peso libre, con el propio peso corporal, con gomas elásticas, etc.)	Entre 45 y 60 minutos	2-3 días	No		No			Descanso fisicamente	Durante el calentamiento inicial, Durante el descanso entre mitades
2021-10-07 19:55:50	Sí	1990-02-28	Mujer	200	90	León	Local	1 año	2018-2019	Categorías inferiores	1 partido/semana	Escolar	Sí	No	Para mantener o desarrollar la resistencia aeróbica (natación, ciclismo, carrera, saltar a la comba, etc.), Para mantener o desarrollar la fuerza muscular (diferentes técnicas de fortalecimiento muscular con máquinas, con peso libre, con el propio peso corporal, con gomas elásticas, etc.), Para mantener o desarrollar la velocidad (capacidad de realizar sprints en el menor tiempo posible y de repe…	Entre 30 y 45 minutos	4-5 días	Sí	Estiramiento	Sí	Estiramientos y movilidad articular, Técnicas de manejo de la respiración (activación/relajación, conciencia)	Reactivación muscular		Durante el calentamiento inicial, Durante el descanso entre mitades, Al finalizar el partido
2021-10-07 19:57:24	Sí	2002-04-17	Mujer	156	51	León	Local, Regional/Autonómica	Local (5 años), Autonómica (4 años)	2018-2019	Categoría senior, Categorías inferiores	Entre 6 y 7 partidos semana	Local, Autonómico Especial y Preferente	Sí	No	Para mantener o desarrollar la resistencia aeróbica (natación, ciclismo, carrera, saltar a la comba, etc.), Para mantener o desarrollar la fuerza muscular (diferentes técnicas de fortalecimiento muscular con máquinas, con peso libre, con el propio peso corporal, con gomas elásticas, etc.), Para mantener o desarrollar otras capacidades (coordinación, equilibrio, agilidad)	Más de 60 minutos	4-5 días	Sí	5-10 minutos	Sí	Técnicas de manejo de la respiración (activación/relajación, conciencia)	Saber controlar la respiración me ayuda a relajarme mentalmente y a la vez a reactivarme de nuevo física y mentalmente antes de volver a la cancha. Esto será importante para soportar lo que resta de partido y mantener la atención necesaria hacia el juego.		Durante el calentamiento inicial, Al finalizar el partido
2021-10-07 19:57:33	Sí	2003-03-20	Hombre	187	70	Valladolid	Local, Regional/Autonómica	Local 3 años, Autonómica 1 año	2019-2020	Categorías inferiores	1 partido/semana	Infantil, Cadete Autonómico Masculino y Femenino	Sí	No	Para mantener o desarrollar la resistencia aeróbica (natación, ciclismo, carrera, saltar a la comba, etc.), Para mantener o desarrollar la fuerza muscular (diferentes técnicas de fortalecimiento muscular con máquinas, con peso libre, con el propio peso corporal, con gomas elásticas, etc.)	Más de 60 minutos	4-5 días	Sí	4-6 mins	No			Porque me encuentro en condiciones para cumplir físicamente si es necesario.	Al finalizar el partido
2021-10-07 19:59:01	Sí	1991-11-29	Hombre	165	64	León	Regional/Autonómica, Nacional	Autonómico 15 años.	2019-2020	Categoría senior, Categorías inferiores	Entre 3 y 4 partidos/semana	Autonómico	Sí	No	Para mantener o desarrollar la resistencia aeróbica (natación, ciclismo, carrera, saltar a la comba, etc.), Para mantener o desarrollar la fuerza muscular (diferentes técnicas de fortalecimiento muscular con máquinas, con peso libre, con el propio peso corporal, con gomas elásticas, etc.)	Entre 45 y 60 minutos	2-3 días	Sí	5	No				Durante el calentamiento inicial
2021-10-07 20:00:24	Sí	1968-02-18	Hombre	185	80	Trobajo del Camino - León	Regional/Autonómica	regional/autonómica (10 años)	2020-2021	Categoría senior	Entre 2 y 3 partidos/semana	regional/autonómica	Sí	No	Para mantener o desarrollar la resistencia aeróbica (natación, ciclismo, carrera, saltar a la comba, etc.)	Entre 30 y 45 minutos	4-5 días	Sí	10-15 minutos	Sí	Estiramientos y movilidad articular	Mantenimiento y activación		Durante el calentamiento inicial, Durante el descanso entre mitades, Al finalizar el partido		Thank you very much for the activity.
2021-10-07 20:04:20	Sí	1973-02-10	Hombre	180	75	Soria	Local, Regional/Autonómica	Local 7 años, regional 6 años	2018-2019	Categorías inferiores	Entre 2 y 3 partidos/semana	Autonomica	Sí	No	Para mantener o desarrollar la resistencia aeróbica (natación, ciclismo, carrera, saltar a la comba, etc.), Para mantener o desarrollar la fuerza muscular (diferentes técnicas de fortalecimiento muscular con máquinas, con peso libre, con el propio peso corporal, con gomas elásticas, etc.)	Entre 30 y 45 minutos	4-5 días	Sí	4-5 minutos	No				Al finalizar el partido
2021-10-07 21:28:07	Sí	1980-08-25	Hombre	172	60	Leon (León)	Regional/Autonómica	8 años	2018-2019	Categoría senior, Categorías inferiores	Entre 4 y 5 partidos/semana	Autonómico	Sí	No	Para mantener o desarrollar la resistencia aeróbica (natación, ciclismo, carrera, saltar a la comba, etc.), Para mantener o desarrollar la fuerza muscular (diferentes técnicas de fortalecimiento muscular con máquinas, con peso libre, con el propio peso corporal, con gomas elásticas, etc.), Para mantener o desarrollar la velocidad (capacidad de realizar sprints en el menor tiempo posible y de repe…	Más de 60 minutos	4-5 días	Sí	10 min	No	Estiramientos y movilidad articular	Hago estiramientos porque previene tirones	No hago nada mas porque es cuerpo necesita tambien sus descansos	Durante el calentamiento inicial, Durante el descanso entre mitades, Al finalizar el partido
2021-10-07 21:41:04	Sí	1973-09-05	Hombre	1,81 mts	91,00 Kg	León	Regional/Autonómica	Regional/Autonómica (12 años )	2018-2019	Categoría senior	Entre 2 y 3 partidos/semana	Autonomica	No	No	Para mantener o desarrollar la resistencia aeróbica (natación, ciclismo, carrera, saltar a la comba, etc.)	Entre 15 y 30 minutos	2-3 días	Sí	5-10 minutos	No			Poca importancia	Durante el calentamiento inicial		Thank you very much for giving us importance and I hope I contribute to your study
2021-10-07 22:07:32	Sí	1996-07-04	Hombre	187	83	León	Regional/Autonómica	Local (2 años), regional/autonómica (4 años)	2018-2019	Categoría senior	Entre 4 y 5 partidos/semana	1a Nacional Masculina FBCYL	Sí	No	Para mantener o desarrollar la resistencia aeróbica (natación, ciclismo, carrera, saltar a la comba, etc.), Para mantener o desarrollar la fuerza muscular (diferentes técnicas de fortalecimiento muscular con máquinas, con peso libre, con el propio peso corporal, con gomas elásticas, etc.), Para mantener o desarrollar la velocidad (capacidad de realizar sprints en el menor tiempo posible y de repe…	Más de 60 minutos	2-3 días	Sí	10-15 minutos	No			Descanso y muchas veces nos centramos en aspectos del juego a tener en cuenta, las situaciones que nos crean problemas...	Durante el calentamiento inicial, Al finalizar el partido
2021-10-08 10:06:45	Sí	1987-06-26	Hombre	182	76	Bilbao, Bizkaia	Local, Regional/Autonómica, Nacional, Internacional	Local (3 años), regional (5años), nacional (9años), internacional (3 años)	2018-2019	Categoría senior	1 partido/semana	Acb, Fiba	Sí	No	Para mantener o desarrollar la fuerza muscular (diferentes técnicas de fortalecimiento muscular con máquinas, con peso libre, con el propio peso corporal, con gomas elásticas, etc.)	Entre 45 y 60 minutos	4-5 días	Sí	5mins	Sí	Trotar o correr, Correr a máxima velocidad (esprintar)	Me encuentro frio, y me ayuda a volver a concentrarme		Durante el calentamiento inicial
2021-10-08 21:18:00	Sí	1987-05-22	Hombre	191	106	Tarragona	Internacional	Local (3 años) Autonómica (7) nacional (5) internacional (1)	2020-2021	Categoría senior	1 partido/semana	ACB	Sí	No	Para mantener o desarrollar la resistencia aeróbica (natación, ciclismo, carrera, saltar a la comba, etc.), Para mantener o desarrollar la fuerza muscular (diferentes técnicas de fortalecimiento muscular con máquinas, con peso libre, con el propio peso corporal, con gomas elásticas, etc.), Para mantener o desarrollar la velocidad (capacidad de realizar sprints en el menor tiempo posible y de repe…	Más de 60 minutos	2-3 días	Sí	5-10 minutos	No	Trotar o correr, Correr a máxima velocidad (esprintar), Ejercicio de fuerza (saltos, flexiones, etc.)		Es muy poco común	Durante el calentamiento inicial		Thanks for this type of studies! All the best
2021-10-29 13:08:19	Sí	1976-02-10	Hombre	175	82	Barcelona	Regional/Autonómica	30	2018-2019	Categoría senior	Entre 1 y 2 partidos/semana	1era Catalan	Sí	No	Para mantener o desarrollar la resistencia aeróbica (natación, ciclismo, carrera, saltar a la comba, etc.), Para mantener o desarrollar la velocidad (capacidad de realizar sprints en el menor tiempo posible y de repetirlos el mayor número de veces)	Entre 30 y 45 minutos	2-3 días	Sí	10 minutos	Sí	Estiramientos y movilidad articular	Cansancio		Durante el descanso entre mitades, Al finalizar el partido
2021-10-29 13:09:10	Sí	2002-09-03	Hombre	180	78	Badalona, Barcelona	Local	Local(2años)	2020-2021	Categorías inferiores	Entre 3 y 4 partidos/semana	Mini A,B,C	Sí	No	Para mantener o desarrollar la resistencia aeróbica (natación, ciclismo, carrera, saltar a la comba, etc.), Para mantener o desarrollar la fuerza muscular (diferentes técnicas de fortalecimiento muscular con máquinas, con peso libre, con el propio peso corporal, con gomas elásticas, etc.), Para mantener o desarrollar la velocidad (capacidad de realizar sprints en el menor tiempo posible y de repe…	Más de 60 minutos	4-5 días	No	10 minutos	No			Estiro pero no necesariamente hago una rutina fisica de reactivacion ya que los niños a los que arbitro no tiene un dessarrollo fisico avanzado	Durante el calentamiento inicial, Al finalizar el partido
2021-10-29 13:09:26	Sí	1999-08-12	Hombre	185	80	Reus	Local, Regional/Autonómica	local (3 años), regional/autonómica (2 años),	2020-2021	Categoría senior, Categorías inferiores	Entre 4 y 5 partidos/semana	B1	Sí	No	Para mantener o desarrollar la resistencia aeróbica (natación, ciclismo, carrera, saltar a la comba, etc.), Para mantener o desarrollar la fuerza muscular (diferentes técnicas de fortalecimiento muscular con máquinas, con peso libre, con el propio peso corporal, con gomas elásticas, etc.)	Más de 60 minutos	2-3 días	Sí	5-10	No			Hablo del desarrollo de la primera parte	Durante el calentamiento inicial
2021-10-29 13:09:33	Sí	1998-07-01	Hombre	190	65	Corbera de Ll. Barcelona	Local	Local - 1 año	2019-2020	Categorías inferiores	Entre 3 y 4 partidos/semana	primera de escuela	Sí	No	Para mantener o desarrollar la resistencia aeróbica (natación, ciclismo, carrera, saltar a la comba, etc.), Para mantener o desarrollar la velocidad (capacidad de realizar sprints en el menor tiempo posible y de repetirlos el mayor número de veces), Para mantener o desarrollar otras capacidades (coordinación, equilibrio, agilidad)	Entre 45 y 60 minutos	2-3 días	No		No			No lo veo necesario	Nunca
2021-10-29 13:09:52	Sí	2000-01-17	Mujer	1.72	62	Sant Adrià de Besós, Barcelona	Regional/Autonómica	1 año regional	2020-2021	Categorías inferiores	Entre 3 y 4 partidos/semana	3ra de Escuela	Sí	No	Para mantener o desarrollar la resistencia aeróbica (natación, ciclismo, carrera, saltar a la comba, etc.), Para mantener o desarrollar la fuerza muscular (diferentes técnicas de fortalecimiento muscular con máquinas, con peso libre, con el propio peso corporal, con gomas elásticas, etc.)	Más de 60 minutos	2-3 días	Sí	15min	Sí	Estiramientos y movilidad articular	Estirar y no sentarme		Durante el descanso entre mitades
2021-10-29 13:10:15	Sí	1992-12-21	Hombre	185	75	Tarragona	Local	7	2018-2019	Categoría senior, Categorías inferiores	Entre 6 y 7 partidos semana	3a catalana masculina y segunda femenina y todas las que las preceden	Sí	No	Para mantener o desarrollar la resistencia aeróbica (natación, ciclismo, carrera, saltar a la comba, etc.), Para mantener o desarrollar la fuerza muscular (diferentes técnicas de fortalecimiento muscular con máquinas, con peso libre, con el propio peso corporal, con gomas elásticas, etc.), Para mantener o desarrollar otras capacidades (coordinación, equilibrio, agilidad)	Más de 60 minutos	6-7 días	No		No			Por que suelo hablar de aspectos tecnicos con el compañero y/o revisar que todo este correctamente	Durante el calentamiento inicial
2021-10-29 13:10:47	Sí	2001-04-04	Hombre	195	75	Tarragona	Local	Local (3 años)	2018-2019	Categorías inferiores	Entre 2 y 3 partidos/semana	Infantil y Cadete (Local)	Sí	No	Para mantener o desarrollar la resistencia aeróbica (natación, ciclismo, carrera, saltar a la comba, etc.)	Entre 30 y 45 minutos	2-3 días	No		No				Durante el calentamiento inicial
2021-10-29 13:10:51	Sí	1995-01-23	Mujer	164	54	Badalona, Barcelona	Regional/Autonómica	3	2017-2018	Categoría senior, Categorías inferiores	Entre 4 y 5 partidos/semana	Comité B2	No	No				Sí	5 minutos	No	Estiramientos y movilidad articular		Con solamente 10 minutos de descanso no lo veo necesario.	Durante el calentamiento inicial
2021-10-29 13:11:37	Sí	1993-03-13	Hombre	180	100	Figueres, Girona	Local	4 años	2020-2021	Categorías inferiores	Entre 1 y 2 partidos/semana	Territorial	Sí	No	Para mantener o desarrollar la resistencia aeróbica (natación, ciclismo, carrera, saltar a la comba, etc.), Para mantener o desarrollar la fuerza muscular (diferentes técnicas de fortalecimiento muscular con máquinas, con peso libre, con el propio peso corporal, con gomas elásticas, etc.), Para mantener o desarrollar la flexibilidad (ya sea con el propio cuerpo, ayuda de otra persona, o con eleme…	Entre 45 y 60 minutos	6-7 días	Sí	10 min	No			Estoy activado	Durante el calentamiento inicial
2021-10-29 13:12:25	Sí	1990-07-26	Hombre	181	88	Tarragona	Local, Regional/Autonómica	5 años	2019-2020	Categoría senior, Categorías inferiores	Entre 4 y 5 partidos/semana	3era Catalana	No					Sí	3 - 6	No			no tengo motivos,por cuestión de tiempo no me es posible	Durante el calentamiento inicial
2021-10-29 13:13:07	Sí	1966-12-18	Hombre	1’91	97	Barcelona	Regional/Autonómica	37 regional/autonòmica	2018-2019	Categoría senior	Entre 3 y 4 partidos/semana	Autonòmica 3 categoria	Sí	No	Para mantener o desarrollar la resistencia aeróbica (natación, ciclismo, carrera, saltar a la comba, etc.), Para mantener o desarrollar la velocidad (capacidad de realizar sprints en el menor tiempo posible y de repetirlos el mayor número de veces)	Entre 15 y 30 minutos	4-5 días	Sí	10 minutos	Sí	Estiramientos y movilidad articular	Bienestad y evitar lesiones		Durante el descanso entre mitades		None and thanks
2021-10-29 13:13:10	Sí	2001-07-03	Hombre	172	75	Vilafant, Gerona	Local	Local (4 años)	2018-2019	Categoría senior, Categorías inferiores	Entre 4 y 5 partidos/semana	3a Catalana	Sí	No	Para mantener o desarrollar la resistencia aeróbica (natación, ciclismo, carrera, saltar a la comba, etc.)	Entre 45 y 60 minutos	2-3 días	No		No			El descanso es de 10 minutos (7 en realidad ) porque debemos volver a pista para indicar 3 minutos restantes antes de empezar la segunda mitad. Durante estos 7 minutos vamos al vestidor con el compañero para hablar del partido y recuperar fuerzas (beber agua, comer algo...).	Durante el calentamiento inicial	No tengo costumbre
2021-10-29 13:13:57	Sí	1988-03-10	Hombre	1.73	73	Tarragona	Local	Local (17 años)	2019-2020	Categoría senior, Categorías inferiores	Entre 4 y 5 partidos/semana	B2	Sí	Sí	Para mantener o desarrollar la resistencia aeróbica (natación, ciclismo, carrera, saltar a la comba, etc.), Para mantener o desarrollar la fuerza muscular (diferentes técnicas de fortalecimiento muscular con máquinas, con peso libre, con el propio peso corporal, con gomas elásticas, etc.), Para mantener o desarrollar la velocidad (capacidad de realizar sprints en el menor tiempo posible y de repe…	Más de 60 minutos	4-5 días	Sí	10 minutos	Sí	Estiramientos y movilidad articular	Estirar extremidades para evitar sobrecargas		Durante el calentamiento inicial, Durante el descanso entre mitades
2021-10-29 13:14:08	Sí	1989-12-30	Hombre	1.8	100	Barcelona	Local, Regional/Autonómica	Local 18 años	2020-2021	Categoría senior, Categorías inferiores	Entre 5 y 6 partidos semana	B2	Sí	No	Para mantener o desarrollar la resistencia aeróbica (natación, ciclismo, carrera, saltar a la comba, etc.), Para mantener o desarrollar la velocidad (capacidad de realizar sprints en el menor tiempo posible y de repetirlos el mayor número de veces)	Entre 30 y 45 minutos	2-3 días	Sí	10 minutos	No				Durante el calentamiento inicial
2021-10-29 13:14:15	Sí	2001-01-24	Hombre	177	70	Barcelona	Local, Regional/Autonómica	Local (2años), regional/autonómica (2años), nacional y internacional (sin experiencia)	2018-2019	Categorías inferiores	Entre 1 y 2 partidos/semana	2018-2019 escuela 3er año	Sí	No	Para mantener o desarrollar la resistencia aeróbica (natación, ciclismo, carrera, saltar a la comba, etc.), Para mantener o desarrollar la fuerza muscular (diferentes técnicas de fortalecimiento muscular con máquinas, con peso libre, con el propio peso corporal, con gomas elásticas, etc.), Para mantener o desarrollar la flexibilidad (ya sea con el propio cuerpo, ayuda de otra persona, o con eleme…	Más de 60 minutos	6-7 días	Sí	5 minutos	Sí	Estiramientos y movilidad articular	Para activar mi cuerpo otra vez y que no le pille por sorpresa.		Durante el calentamiento inicial, Durante el descanso entre mitades
2021-10-29 13:14:28	Sí	2001-06-30	Hombre	178	64	Barcelona	Local, Regional/Autonómica	3 años	2019-2020	Categorías inferiores	Entre 4 y 5 partidos/semana	3a categoria	Sí	No	Para mantener o desarrollar la resistencia aeróbica (natación, ciclismo, carrera, saltar a la comba, etc.), Para mantener o desarrollar la fuerza muscular (diferentes técnicas de fortalecimiento muscular con máquinas, con peso libre, con el propio peso corporal, con gomas elásticas, etc.)	Más de 60 minutos	2-3 días	No		No			Mi nivel fisico me permite estar bien para el partido	Durante el calentamiento inicial
2021-10-29 13:14:43	Sí	1998-09-15	Hombre	180	87	BADALONA (BARCELONA)	Regional/Autonómica	4 AÑOS, 5ª TEMPORADA ARBITRANDO	2019-2020	Categoría senior, Categorías inferiores	7 o más partidos/semana	En la 2019-20 arbitraba en la 3ª Catalana (4ª categoría a nivel autonómico de Cataluña)	Sí	No	Para mantener o desarrollar la resistencia aeróbica (natación, ciclismo, carrera, saltar a la comba, etc.), Para mantener o desarrollar la fuerza muscular (diferentes técnicas de fortalecimiento muscular con máquinas, con peso libre, con el propio peso corporal, con gomas elásticas, etc.), Para mantener o desarrollar la flexibilidad (ya sea con el propio cuerpo, ayuda de otra persona, o con eleme…	Más de 60 minutos	4-5 días	Sí	10 minutos	Sí	Estiramientos y movilidad articular	Para evitar molestias en zonas donde me pueda sentir agarrotado o sobrecargado		Durante el calentamiento inicial, Durante el descanso entre mitades
2021-10-29 13:15:23	Sí	1999-03-04	Hombre	181	89	Mataró, Barcelona	Local, Regional/Autonómica	Local (4 años), Regional/Autonómica (1 año).	2019-2020	Categoría senior, Categorías inferiores	Entre 6 y 7 partidos semana	Tercera catalana y todas las inferiores a ella. (Categoría B2)	Sí	No	Para mantener o desarrollar la fuerza muscular (diferentes técnicas de fortalecimiento muscular con máquinas, con peso libre, con el propio peso corporal, con gomas elásticas, etc.), Para mantener o desarrollar la velocidad (capacidad de realizar sprints en el menor tiempo posible y de repetirlos el mayor número de veces)	Más de 60 minutos	4-5 días	Sí	3-5 minutos.	Sí	Estiramientos y movilidad articular	Al estar parado 10 minutos, a veces siento que las articulaciones tanto de rodilla como de cadera se me han podido "enfriar" y me siento más cómodo haciendo estiramientos dinámicos y movilidad articular durante aproximadamente un minuto.		Durante el calentamiento inicial, Durante el descanso entre mitades
2021-10-29 13:16:07	Sí	1997-03-14	Hombre	181	70	Barcelona	Local	2 años	2020-2021	Categorías inferiores	Entre 3 y 4 partidos/semana	2a de escuela	No	No		Menos de 15 minutos	1 día	No		No			No lo necesito	Durante el calentamiento inicial
2021-10-29 13:17:35	Sí	2001-12-11	Hombre	191	76	Barcelona	Local	Local (4 años)	2020-2021	Categorías inferiores	Entre 4 y 5 partidos/semana	Grupo 2	Sí	No	Para mantener o desarrollar la resistencia aeróbica (natación, ciclismo, carrera, saltar a la comba, etc.), Para mantener o desarrollar la fuerza muscular (diferentes técnicas de fortalecimiento muscular con máquinas, con peso libre, con el propio peso corporal, con gomas elásticas, etc.), Para mantener o desarrollar la velocidad (capacidad de realizar sprints en el menor tiempo posible y de repe…	Más de 60 minutos	4-5 días	No		No			Intento mantenerme siempre lo menos cansado posible para poder arbitrar los siguientes partidos con frescura. Si veo que me falta un poco de activación realizo unos pocos ejercicios de movilidad.	Durante el calentamiento inicial, Durante el descanso entre mitades
2021-10-29 13:17:36	Sí	2002-01-23	Hombre	1’79	64	Barcelona	Local	Local (2 años)	2019-2020	Categorías inferiores	Entre 4 y 5 partidos/semana	Desde Pre-mini hasta Cadete	No	No				No		No			No había pensado nunca que fuera necesario, ni siquiera habia pensado en la reactivación.	Nunca	No los veo necesarios, me dan pereza.
2021-10-29 13:17:55	Sí	1989-03-21	Hombre	180	115	Terrassa	Regional/Autonómica	1 año	2020-2021	Categorías inferiores	Entre 2 y 3 partidos/semana	Mini y Premini	Sí	No	Para mantener o desarrollar la resistencia aeróbica (natación, ciclismo, carrera, saltar a la comba, etc.)	Entre 30 y 45 minutos	1 día	No		No			En 3 minutos de descanso no ha e falta reactivarse	Durante el calentamiento inicial
2021-10-29 13:18:53	Sí	1997-06-09	Hombre	175	68	Girona	Regional/Autonómica	autonómica (8 años)	2018-2019	Categoría senior	Entre 4 y 5 partidos/semana	1a catalana	Sí	No	Para mantener o desarrollar la resistencia aeróbica (natación, ciclismo, carrera, saltar a la comba, etc.), Para mantener o desarrollar la fuerza muscular (diferentes técnicas de fortalecimiento muscular con máquinas, con peso libre, con el propio peso corporal, con gomas elásticas, etc.)	Más de 60 minutos	6-7 días	Sí	5-10 minutos	No			Hay 10 minutos de media parte y en esta se repasa la acta del partido y se comenta con el compañero aspectos a mejorar en la segunda parte.	Durante el calentamiento inicial
2021-10-29 13:19:25	Sí	1986-12-01	Hombre	181	81	Barcelona, España	Regional/Autonómica	regional/autonómica(7 años)	2018-2019	Categoría senior, Categorías inferiores	7 o más partidos/semana	1a Categoria Catalana, Copa Catalunya, Preferentes, Escolar, Amateur	Sí	No	Para mantener o desarrollar la fuerza muscular (diferentes técnicas de fortalecimiento muscular con máquinas, con peso libre, con el propio peso corporal, con gomas elásticas, etc.), Para mantener o desarrollar la flexibilidad (ya sea con el propio cuerpo, ayuda de otra persona, o con elementos como toallas, gomas elásticas, foam roller, etc.), Para mantener o desarrollar otras capacidades (coord…	Entre 45 y 60 minutos	4-5 días	Sí	5 minutos	No			No he tenido necesidad. Mi cuerpo no llega a enfriarse y la activación es casi inmediata durante las primeras jugadas del partido.	Durante el descanso entre mitades, Al finalizar el partido
2021-10-29 13:22:08	Sí	1994-07-06	Hombre	191	125	Barcelona, Barcelona	Regional/Autonómica	Regional (10 años)	2019-2020	Categoría senior	7 o más partidos/semana	3a Catalana (B2)	Sí	Sí	Para mantener o desarrollar la resistencia aeróbica (natación, ciclismo, carrera, saltar a la comba, etc.), Para mantener o desarrollar la fuerza muscular (diferentes técnicas de fortalecimiento muscular con máquinas, con peso libre, con el propio peso corporal, con gomas elásticas, etc.), Para mantener o desarrollar la velocidad (capacidad de realizar sprints en el menor tiempo posible y de repe…	Entre 45 y 60 minutos	2-3 días	Sí	5 - 10 minutos	No			El descanso no es suficiente para enfriarme físicamente entonces no lo necesito	Durante el calentamiento inicial, Al finalizar el partido
2021-10-29 13:21:29	Sí	2000-08-11	Hombre	1.73	69.7	Barcelona	Local	Local (4 años)	2018-2019	Categorías inferiores	Entre 4 y 5 partidos/semana	Hasta infantil	Sí	No	Para mantener o desarrollar la fuerza muscular (diferentes técnicas de fortalecimiento muscular con máquinas, con peso libre, con el propio peso corporal, con gomas elásticas, etc.)	Más de 60 minutos	2-3 días	No		No			No lo tengo como costumbre	Nunca	No es una costumbre
2021-10-29 13:21:43	Sí	2002-06-07	Hombre	189	88	L'Escala, Girona	Local, Regional/Autonómica	local (2 años), regional (1 año)	2020-2021	Categoría senior, Categorías inferiores	Entre 4 y 5 partidos/semana	FCBQ B2	Sí	No	Para mantener o desarrollar la resistencia aeróbica (natación, ciclismo, carrera, saltar a la comba, etc.)	Entre 15 y 30 minutos	2-3 días	Sí	5-10 minutos	No			Falta de tiempo.	Durante el calentamiento inicial, Al finalizar el partido
2021-10-29 13:22:34	Sí	1996-12-14	Hombre	170	63	Girona, Girona	Regional/Autonómica	Regional (5 años)	2019-2020	Categoría senior, Categorías inferiores	Entre 4 y 5 partidos/semana	FCBQ B1	Sí	No	Para mantener o desarrollar la resistencia aeróbica (natación, ciclismo, carrera, saltar a la comba, etc.), Para mantener o desarrollar la fuerza muscular (diferentes técnicas de fortalecimiento muscular con máquinas, con peso libre, con el propio peso corporal, con gomas elásticas, etc.)	Más de 60 minutos	4-5 días	No		No			No lo veo suficientemente necesario	Durante el calentamiento inicial
2021-10-29 13:23:50	Sí	1988-10-08	Mujer	174	ns	BARCELONA	Local, Regional/Autonómica	LOCAL: 5 AÑOS / AUTONOMICA 10 AÑOS	2019-2020	Categoría senior, Categorías inferiores	Entre 5 y 6 partidos semana	LIGAS CATALANAS	Sí	No	Para mantener o desarrollar la resistencia aeróbica (natación, ciclismo, carrera, saltar a la comba, etc.), Para mantener o desarrollar la fuerza muscular (diferentes técnicas de fortalecimiento muscular con máquinas, con peso libre, con el propio peso corporal, con gomas elásticas, etc.), Para mantener o desarrollar la flexibilidad (ya sea con el propio cuerpo, ayuda de otra persona, o con eleme…	Entre 30 y 45 minutos	2-3 días	Sí	5 MINUTOS	Sí	Estiramientos y movilidad articular, Técnicas de manejo de la respiración (activación/relajación, conciencia)	RECUPERACIÓN FÍSICIA	-	Durante el calentamiento inicial, Durante el descanso entre mitades, Al finalizar el partido	-
2021-10-29 13:25:15	Sí	1999-02-12	Hombre	183	96	Navàs, Barcelona	Local, Regional/Autonómica	Local (6 años) y Autonomica (4años)	2019-2020	Categorías inferiores	Entre 3 y 4 partidos/semana	Premini, Mini, Preinfantil, Infantil i Cadete	Sí	No	Para mantener o desarrollar la resistencia aeróbica (natación, ciclismo, carrera, saltar a la comba, etc.), Para mantener o desarrollar la fuerza muscular (diferentes técnicas de fortalecimiento muscular con máquinas, con peso libre, con el propio peso corporal, con gomas elásticas, etc.), Para mantener o desarrollar la velocidad (capacidad de realizar sprints en el menor tiempo posible y de repe…	Más de 60 minutos	6-7 días	No		No			Aprovecho el tiempo para relajar la mente, desconectar de como va el partido en cuestión para volver más concentrado luego.	Nunca	No los hago frecuentemente, però a veces si cuando siento molestias y necesito calentar la articulación, musculo o la parte que sea.
2021-10-29 13:25:32	Sí	2000-12-19	Hombre	1.78	68	Parets del Vallès	Regional/Autonómica	regional/automatica (4 años )	2020-2021	Categorías inferiores	Entre 5 y 6 partidos semana	1ra EABQ	Sí	No	Para mantener o desarrollar la resistencia aeróbica (natación, ciclismo, carrera, saltar a la comba, etc.), Para mantener o desarrollar la fuerza muscular (diferentes técnicas de fortalecimiento muscular con máquinas, con peso libre, con el propio peso corporal, con gomas elásticas, etc.), Para mantener o desarrollar la flexibilidad (ya sea con el propio cuerpo, ayuda de otra persona, o con eleme…	Más de 60 minutos	4-5 días	Sí	15 minutos	No			nunca me he planteado hacer ejercicios de reactivacion	Durante el calentamiento inicial, Al finalizar el partido
2021-10-29 13:26:19	Sí	2000-10-21	Hombre	184	68	Barcelona	Regional/Autonómica	3 Años	2019-2020	Categorías inferiores	7 o más partidos/semana	EABQ 1a	Sí	No	Para mantener o desarrollar la fuerza muscular (diferentes técnicas de fortalecimiento muscular con máquinas, con peso libre, con el propio peso corporal, con gomas elásticas, etc.)	Más de 60 minutos	4-5 días	No		No			Agotamiento físico y falta de tiempo	Nunca	Falta de tiempo
2021-10-29 13:26:33	Sí	1985-04-01	Hombre	178	80	Malgrat de Mar, Barcelona	Local	Local 17 años	2018-2019	Categoría senior	Entre 2 y 3 partidos/semana	Copa Cat femenino, 1 Cat masculino	Sí	No	Para mantener o desarrollar la resistencia aeróbica (natación, ciclismo, carrera, saltar a la comba, etc.), Para mantener o desarrollar la fuerza muscular (diferentes técnicas de fortalecimiento muscular con máquinas, con peso libre, con el propio peso corporal, con gomas elásticas, etc.)	Más de 60 minutos	4-5 días	Sí	5-10minutos	No	Trotar o correr		Descanso,para activarme mentalmente,desde que quedan 3 minutos para reanudarse	Durante el calentamiento inicial
2021-10-29 13:26:36	Sí	1969-03-20	Hombre	175	76	Barcelona	Regional/Autonómica	25	2018-2019	Categoría senior	Entre 3 y 4 partidos/semana	Copa Catalunya	Sí	No	Para mantener o desarrollar la resistencia aeróbica (natación, ciclismo, carrera, saltar a la comba, etc.), Para mantener o desarrollar la fuerza muscular (diferentes técnicas de fortalecimiento muscular con máquinas, con peso libre, con el propio peso corporal, con gomas elásticas, etc.), Para mantener o desarrollar la flexibilidad (ya sea con el propio cuerpo, ayuda de otra persona, o con eleme…	Entre 45 y 60 minutos	4-5 días	Sí	10 minutos	Sí	Estiramientos y movilidad articular	Evitar lesiones, mantener tensión física.		Durante el calentamiento inicial, Durante el descanso entre mitades
2021-10-29 13:26:37	Sí	2003-02-20	Hombre	185	75	Barcelona	Local	local (2 años)	2020-2021	Categorías inferiores	Entre 2 y 3 partidos/semana	Hasta Cadete en Cataluña	Sí	No	Para mantener o desarrollar la resistencia aeróbica (natación, ciclismo, carrera, saltar a la comba, etc.), Para mantener o desarrollar la fuerza muscular (diferentes técnicas de fortalecimiento muscular con máquinas, con peso libre, con el propio peso corporal, con gomas elásticas, etc.), Para mantener o desarrollar la velocidad (capacidad de realizar sprints en el menor tiempo posible y de repe…	Más de 60 minutos	4-5 días	No		No			Me siento activo desde el minuto 1	Nunca	Nunca me lo habia planteado ya que nunca he tenido ningún problema muscular. Quizá deberia empezar a hacerlo
2021-10-29 13:27:10	Sí	1994-09-18	Hombre	178	80	Mataro	Regional/Autonómica	8años	2020-2021	Categoría senior	Entre 5 y 6 partidos semana	2b	Sí	No	Para mantener o desarrollar la fuerza muscular (diferentes técnicas de fortalecimiento muscular con máquinas, con peso libre, con el propio peso corporal, con gomas elásticas, etc.), Para mantener o desarrollar la velocidad (capacidad de realizar sprints en el menor tiempo posible y de repetirlos el mayor número de veces)	Más de 60 minutos	6-7 días	Sí	8 minutos	Sí	Estiramientos y movilidad articular	Para que los músculos estén preparados para iniciar otra vez el ejercicio y no se enfríen.		Durante el descanso entre mitades
2021-10-29 13:27:39	Sí	1996-06-08	Hombre	183	77	Barcelona	Regional/Autonómica	7	2021-2022	Categoría senior	Entre 5 y 6 partidos semana	1a Catalana	Sí	No	Para mantener o desarrollar la resistencia aeróbica (natación, ciclismo, carrera, saltar a la comba, etc.), Para mantener o desarrollar la fuerza muscular (diferentes técnicas de fortalecimiento muscular con máquinas, con peso libre, con el propio peso corporal, con gomas elásticas, etc.), Para mantener o desarrollar la flexibilidad (ya sea con el propio cuerpo, ayuda de otra persona, o con eleme…	Entre 45 y 60 minutos	2-3 días	Sí	6 - 8 minutos	No	Trotar o correr, Correr a máxima velocidad (esprintar), Estiramientos y movilidad articular			Durante el calentamiento inicial, Al finalizar el partido
2021-10-29 13:33:16	Sí	1989-02-07	Mujer	168	61	Borrassà, Girona	Internacional	Local y autonómica (17 años), nacional (7 años), internacional (2 años)	2018-2019	Categoría senior	Entre 1 y 2 partidos/semana	FEB grupo 1	Sí	Sí	Para mantener o desarrollar la resistencia aeróbica (natación, ciclismo, carrera, saltar a la comba, etc.), Para mantener o desarrollar la fuerza muscular (diferentes técnicas de fortalecimiento muscular con máquinas, con peso libre, con el propio peso corporal, con gomas elásticas, etc.), Para mantener o desarrollar la velocidad (capacidad de realizar sprints en el menor tiempo posible y de repe…	Más de 60 minutos	4-5 días	Sí	8-12 min	Sí	Trotar o correr, Correr a máxima velocidad (esprintar), Técnicas de manejo de la respiración (activación/relajación, conciencia), Otras	Para seguir activada de cara a la segunda mitad de partido tanto mental como físicamente y así evitar lesiones o falta de concentración		Durante el calentamiento inicial, Durante el descanso entre mitades, Al finalizar el partido
2021-10-29 13:33:54	Sí	2004-01-22	Hombre	168	69	Barcelona	Local	Local 1 año Resto nada	2020-2021	Categorías inferiores	Entre 2 y 3 partidos/semana	3ª Escola d'Àrbitres FCBQ/2ª Escola d'Àrbitres FCBQ	Sí	No	Para mantener o desarrollar la resistencia aeróbica (natación, ciclismo, carrera, saltar a la comba, etc.), Para mantener o desarrollar la fuerza muscular (diferentes técnicas de fortalecimiento muscular con máquinas, con peso libre, con el propio peso corporal, con gomas elásticas, etc.)	Entre 30 y 45 minutos	2-3 días	No		No			El intervalo de tiempo entre mitades es muy corto	Nunca	No los requiero todavía en estas categorías
2021-10-29 13:35:44	Sí	2001-06-03	Hombre	181	75	Barcelona	Local	Local (3 años)	2018-2019	Categorías inferiores	Entre 2 y 3 partidos/semana	Premini, mini, preinfantil, infantil, cadete	No	No				No		No			No me hace falta	Nunca	No me hace falta
2021-10-29 13:38:35	Sí	2001-02-14	Hombre	181	70	Viladrau, Girona	Local	Empiezo (marzo 2020) hasta ahora	2020-2021	Categorías inferiores	Entre 1 y 2 partidos/semana	Escola 2 i escola 3	Sí	No	Para mantener o desarrollar la resistencia aeróbica (natación, ciclismo, carrera, saltar a la comba, etc.)	Entre 15 y 30 minutos	2-3 días	Sí	5 minutos	Sí	Trotar o correr	Para no lesionarme durante el partido		Durante el calentamiento inicial
2021-10-29 13:40:15	Sí	1992-02-16	Hombre	189	86	Barcelona	Regional/Autonómica	10 años en Autonómica (4a temporada en máxima categoría catalana)	2018-2019	Categoría senior	Entre 4 y 5 partidos/semana	Copa Catalunya	Sí	No	Para mantener o desarrollar la resistencia aeróbica (natación, ciclismo, carrera, saltar a la comba, etc.), Para mantener o desarrollar la fuerza muscular (diferentes técnicas de fortalecimiento muscular con máquinas, con peso libre, con el propio peso corporal, con gomas elásticas, etc.), Para mantener o desarrollar la flexibilidad (ya sea con el propio cuerpo, ayuda de otra persona, o con eleme…	Entre 45 y 60 minutos	2-3 días	Sí	5-7 minutos	No			10 minutos entre cuartos. Repasar acta, comentar aspectos relevantes del juego con el compañero hace que no me plantee reactivarme.	Durante el calentamiento inicial
2021-10-29 13:41:19	Sí	2000-04-29	Hombre	165	64	Barcelona, Barcelona	Local, Regional/Autonómica	Local (3 años), Autonómica (2 años), Nacional e Internacional (sin experiencia)	2019-2020	Categorías inferiores	Entre 3 y 4 partidos/semana	Categorías de la Federación Catalana de Baloncesto: 1a de Escuela, Categorias Cadete e inferiores	Sí	No	Para mantener o desarrollar la resistencia aeróbica (natación, ciclismo, carrera, saltar a la comba, etc.)	Entre 45 y 60 minutos	2-3 días	No		No			Diria por tiempo, pero mas bien seria por hábito de no hacerlo	Durante el calentamiento inicial, Al finalizar el partido
2021-10-29 13:42:29	Sí	1991-07-06	Hombre	1.67	68	Barcelona	Regional/Autonómica	autonómica (14 años)	2019-2020	Categoría senior	Entre 5 y 6 partidos semana	Segunda Catalana	Sí	No	Para mantener o desarrollar la resistencia aeróbica (natación, ciclismo, carrera, saltar a la comba, etc.), Para mantener o desarrollar la fuerza muscular (diferentes técnicas de fortalecimiento muscular con máquinas, con peso libre, con el propio peso corporal, con gomas elásticas, etc.), Para mantener o desarrollar la flexibilidad (ya sea con el propio cuerpo, ayuda de otra persona, o con eleme…	Entre 45 y 60 minutos	2-3 días	Sí	5-10 minutos	No	Trotar o correr, Correr a máxima velocidad (esprintar), Estiramientos y movilidad articular		Simplemento realizo algún estiramiento	Durante el calentamiento inicial, Durante el descanso entre mitades
2021-10-29 13:43:40	Sí	1981-01-31	Hombre	172	74	Canovelles (Barcelona)	Regional/Autonómica	6	2019-2020	Categoría senior, Categorías inferiores	Entre 1 y 2 partidos/semana	3a CATALANA	Sí	No	Para mantener o desarrollar la resistencia aeróbica (natación, ciclismo, carrera, saltar a la comba, etc.)	Entre 45 y 60 minutos	2-3 días	No		No				Durante el calentamiento inicial, Durante el descanso entre mitades
2021-10-29 13:44:59	Sí	1974-12-05	Hombre	186	120	Gavá	Local	4	2019-2020	Categorías inferiores	Entre 4 y 5 partidos/semana	Escuela	Sí	No	Para mantener o desarrollar la resistencia aeróbica (natación, ciclismo, carrera, saltar a la comba, etc.)	Entre 45 y 60 minutos	2-3 días	Sí	10 minutos	No			No hay tiempo prácticamente	Durante el calentamiento inicial
2021-10-29 13:46:16	Sí	1997-08-04	Hombre	180	81	Canovelles/Barcelona	Local, Regional/Autonómica	Local (7 años), regional (7 años)	2019-2020	Categoría senior	Entre 6 y 7 partidos semana	FCBQ B2	Sí	No	Para mantener o desarrollar la fuerza muscular (diferentes técnicas de fortalecimiento muscular con máquinas, con peso libre, con el propio peso corporal, con gomas elásticas, etc.), Para mantener o desarrollar la flexibilidad (ya sea con el propio cuerpo, ayuda de otra persona, o con elementos como toallas, gomas elásticas, foam roller, etc.)	Más de 60 minutos	4-5 días	Sí	5 minutos	No			Porque no me da tiempo a enfríarme.	Durante el calentamiento inicial, Durante el descanso entre mitades
2021-10-29 13:47:09	Sí	1987-01-09	Hombre	184	80	Banyoles (Gerona)	Regional/Autonómica	16 años autonómica	2019-2020	Categoría senior	Entre 3 y 4 partidos/semana	A1 atonómica hasta infantiles	Sí	No	Para mantener o desarrollar la resistencia aeróbica (natación, ciclismo, carrera, saltar a la comba, etc.)	Más de 60 minutos	2-3 días	Sí	5-7 minutos	No	Trotar o correr, Correr a máxima velocidad (esprintar), Estiramientos y movilidad articular		No hay tiempo (se debe comentar el partido y además de repasar actas)	Durante el calentamiento inicial
2021-10-29 13:47:30	Sí	1997-08-11	Hombre	180	80	Barcelona	Regional/Autonómica	7 años	2020-2021	Categoría senior, Categorías inferiores	Entre 5 y 6 partidos semana	De 1a catalana hacia abajo	Sí	No	Para mantener o desarrollar otras capacidades (coordinación, equilibrio, agilidad)	Más de 60 minutos	2-3 días	Sí	5-8 minutos	No			Hay poco tiempo en la mitad y lo usamos para hablar de como va el partido y preparar la segunda mitad	Durante el calentamiento inicial
2021-10-29 13:47:46	Sí	2000-05-25	Hombre	170	63	Barcelona	Local	2 años y medio	2020-2021	Categoría senior, Categorías inferiores	Entre 6 y 7 partidos semana	3a catalana	Sí	Sí	Para mantener o desarrollar la resistencia aeróbica (natación, ciclismo, carrera, saltar a la comba, etc.), Para mantener o desarrollar la velocidad (capacidad de realizar sprints en el menor tiempo posible y de repetirlos el mayor número de veces), Para mantener o desarrollar la flexibilidad (ya sea con el propio cuerpo, ayuda de otra persona, o con elementos como toallas, gomas elásticas, foam …	Más de 60 minutos	6-7 días	No		No			Nunca lo he necesitado, de hecho, ni se me había ocurrido	Nunca	Después de arbitrar solo estiro en situaciones puntuales cuando me encuentro cargado por el volumen de partidos o por el volumen de entrenamiento semanal
2021-10-29 13:51:56	Sí	2004-05-11	Hombre	185	72	Sabadell, Barcelona.	Local	Local (1 mes)	Respecte aquesta temporada, 2021-2022	Categorías inferiores	Entre 1 y 2 partidos/semana	Premini i minis.	Sí	No	Para mantener o desarrollar la resistencia aeróbica (natación, ciclismo, carrera, saltar a la comba, etc.), Para mantener o desarrollar la fuerza muscular (diferentes técnicas de fortalecimiento muscular con máquinas, con peso libre, con el propio peso corporal, con gomas elásticas, etc.), Para mantener o desarrollar la flexibilidad (ya sea con el propio cuerpo, ayuda de otra persona, o con eleme…	Más de 60 minutos	4-5 días	Sí	En un entrenamiento normal puede durar unos 20 minutos, durante una competición unos 45 minutos y en un partido donde arbitro unos 15 minutos.	Sí	Estiramientos y movilidad articular	Para estar preparado para el reinicio de la competición.		Durante el calentamiento inicial, Durante el descanso entre mitades, Al finalizar el partido
2021-10-29 13:51:58	Sí	1998-10-29	Hombre	191	80	Barcelona	Regional/Autonómica	regional/autonómica (3años),	2020-2021	Categorías inferiores	Entre 1 y 2 partidos/semana	FCBQ	Sí	No	Para mantener o desarrollar la resistencia aeróbica (natación, ciclismo, carrera, saltar a la comba, etc.), Para mantener o desarrollar la fuerza muscular (diferentes técnicas de fortalecimiento muscular con máquinas, con peso libre, con el propio peso corporal, con gomas elásticas, etc.), Para mantener o desarrollar la velocidad (capacidad de realizar sprints en el menor tiempo posible y de repe…	Más de 60 minutos	6-7 días	No		No			pereza, no supone una actividad Q requiera de más de un minuto de trote y morbilidad	Durante el calentamiento inicial
2021-10-29 13:54:54	Sí	1999-03-01	Mujer	166	59	Barcelona	Local	local (4 años)	2018-2019	Categorías inferiores	Entre 1 y 2 partidos/semana	1a escuela	Sí	No	Para mantener o desarrollar la resistencia aeróbica (natación, ciclismo, carrera, saltar a la comba, etc.)	Entre 45 y 60 minutos	2-3 días	No		No				Nunca
2021-10-29 13:55:58	Sí	1995-05-28	Hombre	180	70	Barcelona	Local, Regional/Autonómica	5 local 6 regional	2019-2020	Categoría senior, Categorías inferiores	Entre 6 y 7 partidos semana	1a catalana	Sí	No	Para mantener o desarrollar la resistencia aeróbica (natación, ciclismo, carrera, saltar a la comba, etc.), Para mantener o desarrollar la fuerza muscular (diferentes técnicas de fortalecimiento muscular con máquinas, con peso libre, con el propio peso corporal, con gomas elásticas, etc.), Para mantener o desarrollar la flexibilidad (ya sea con el propio cuerpo, ayuda de otra persona, o con eleme…	Más de 60 minutos	4-5 días	Sí	5-8 min	No			El poco tiempo que hay!	Durante el calentamiento inicial, Al finalizar el partido
2021-10-29 13:55:59	Sí	1989-08-04	Mujer	175	68	Barcelona	Local, Regional/Autonómica	15, 15	2017-18	Categoría senior, Categorías inferiores	Entre 4 y 5 partidos/semana	Nacional: 2017 - Actualidad; FEB - Grupo 3: 2021-22	Sí	No	Para mantener o desarrollar la resistencia aeróbica (natación, ciclismo, carrera, saltar a la comba, etc.), Para mantener o desarrollar la fuerza muscular (diferentes técnicas de fortalecimiento muscular con máquinas, con peso libre, con el propio peso corporal, con gomas elásticas, etc.), Para mantener o desarrollar la velocidad (capacidad de realizar sprints en el menor tiempo posible y de repe…	Entre 45 y 60 minutos	4-5 días	Sí	10MIN	No			Falta de hábito	Durante el calentamiento inicial, Durante el descanso entre mitades, Al finalizar el partido
2021-10-29 13:59:36	Sí	1985-10-23	Hombre	188	100	Barcelona	Regional/Autonómica	Region/ Autonomica ( 10 )	2019-2020	Categoría senior, Categorías inferiores	Entre 4 y 5 partidos/semana	A1,A2, B1, B2 ( Catalunya )	Sí	No	Para mantener o desarrollar la resistencia aeróbica (natación, ciclismo, carrera, saltar a la comba, etc.), Para mantener o desarrollar la fuerza muscular (diferentes técnicas de fortalecimiento muscular con máquinas, con peso libre, con el propio peso corporal, con gomas elásticas, etc.), Para mantener o desarrollar otras capacidades (coordinación, equilibrio, agilidad)	Más de 60 minutos	4-5 días	No		No			Sinceramente creo que no lo necesito	Al finalizar el partido
2021-10-29 14:00:11	Sí	1990-03-18	Hombre	189	94	Barcelona	Regional/Autonómica	Autonòmica 4	2018-2019	Categoría senior, Categorías inferiores	Entre 6 y 7 partidos semana	Basquet català B1	Sí	Sí	Para mantener o desarrollar la resistencia aeróbica (natación, ciclismo, carrera, saltar a la comba, etc.), Para mantener o desarrollar la fuerza muscular (diferentes técnicas de fortalecimiento muscular con máquinas, con peso libre, con el propio peso corporal, con gomas elásticas, etc.), Para mantener o desarrollar la flexibilidad (ya sea con el propio cuerpo, ayuda de otra persona, o con eleme…	Entre 45 y 60 minutos	4-5 días	Sí	13 minutos	Sí	Estiramientos y movilidad articular	Evitar entrar en un estadi de reposo para evitar lesiones.		Durante el calentamiento inicial, Durante el descanso entre mitades, Al finalizar el partido
2021-10-29 14:07:46	Sí	1990-08-07	Hombre	190	90	Prat llobregat, Barcelona	Local	(13 años)	2020-2021	Categorías inferiores	Entre 4 y 5 partidos/semana	Escuela	Sí	No	Para mantener o desarrollar la resistencia aeróbica (natación, ciclismo, carrera, saltar a la comba, etc.), Para mantener o desarrollar otras capacidades (coordinación, equilibrio, agilidad)	Más de 60 minutos	4-5 días	No		No			No hay tiempo. Lo dedicamos a la charla de partido.	Nunca, Durante el calentamiento inicial	No hay tiempo. A veces cuando partido es intenso si hago un poco pero sino no
2021-10-29 14:07:53	Sí	2021-10-20	Hombre	174	72	Barcelina	Regional/Autonómica	6 años	2018-2019	Categoría senior, Categorías inferiores	Entre 3 y 4 partidos/semana	3a catalana	No	No	Para mantener o desarrollar la resistencia aeróbica (natación, ciclismo, carrera, saltar a la comba, etc.)	Entre 30 y 45 minutos	2-3 días	Sí	10 min	No			Prefiero descansar relajar mentalmente	Durante el calentamiento inicial
2021-10-29 14:15:18	Sí	1999-03-31	Hombre	180	98	Esparreguera, Barcelona	Local	Local (3 años)	2020-2021	Categorías inferiores	Entre 6 y 7 partidos semana	1a escola	Sí	No	Para mantener o desarrollar la resistencia aeróbica (natación, ciclismo, carrera, saltar a la comba, etc.)	Entre 45 y 60 minutos	2-3 días	Sí	5-10 minutos	No			Depende de la categoría y exigencia de cada partido, de la carga física que lleves acumulada durante el fin de semana... En 10 minutos normalmente prefiero darme un respiro, avaluar la situación de partido y pensar en cómo actuar en la segunda mitad. Si me veo con alguna molestia física, entonces sí que pruebo de estirar y calentar un poco en el descanso.	Durante el calentamiento inicial
2021-10-29 14:17:06	Sí	2000-09-30	Hombre	180	73	Barcelona	Local	Local (3 años)	2018-2019	Categorías inferiores	Entre 1 y 2 partidos/semana	Categoria Mini y Pasarela FCBQ	Sí	No	Para mantener o desarrollar la resistencia aeróbica (natación, ciclismo, carrera, saltar a la comba, etc.)	Más de 60 minutos	4-5 días	No		No			De momento en las categorias donde arbitro solo hay 3 minutos entre mitades	Nunca	Falta algún tipo de formación o información de qué es necesario hacer
2021-10-29 14:21:27	Sí	1992-04-19	Hombre	190	85	Granollers, Barcelona	Regional/Autonómica	Provincial 8 años. Autonómica 2 años	2021-2022	Categoría senior	Entre 3 y 4 partidos/semana	Copa Catalunya	Sí	No	Para mantener o desarrollar la resistencia aeróbica (natación, ciclismo, carrera, saltar a la comba, etc.)	Entre 30 y 45 minutos	4-5 días	Sí	Carrera de baja intensidad 5 minutos y estiramientos	Sí	Estiramientos y movilidad articular	Para volver a preparar el cuerpo para el ejercicio físico		Durante el calentamiento inicial, Durante el descanso entre mitades, Al finalizar el partido
2021-10-29 14:23:06	Sí	2003-12-02	Hombre	191	87	Barcelona	Local	1 mes	2021-2022	Categorías inferiores	Entre 1 y 2 partidos/semana	Pre-mini y mini	Sí	Sí	Para mantener o desarrollar la fuerza muscular (diferentes técnicas de fortalecimiento muscular con máquinas, con peso libre, con el propio peso corporal, con gomas elásticas, etc.)	Más de 60 minutos	2-3 días	No		No			No sé qué hacer	Nunca
2021-10-29 14:23:12	Sí	2000-07-31	Hombre	1.91	85	Cerdanyola del Vallès	Regional/Autonómica	Regional/autonómica (2 años)	2020-2021	Categorías inferiores	Entre 6 y 7 partidos semana	Cadete interterritorial, cadete primer año y inferiores	No					Sí	Estiramientos y carrera continua	Sí	Estiramientos y movilidad articular	Enfriamiento muscular		Durante el calentamiento inicial, Durante el descanso entre mitades
2021-10-29 14:28:01	Sí	2003-08-13	Hombre	185	69	Barcelona	Local, Regional/Autonómica	local (1 año), regional/autonómica (2 años), nacional (sin experiencia), internacional (sin experiencia)	2019-2020	Categorías inferiores	Entre 2 y 3 partidos/semana	2EABQ (Escuela de Árbitros FCBQ)	Sí	No	Para mantener o desarrollar la resistencia aeróbica (natación, ciclismo, carrera, saltar a la comba, etc.), Para mantener o desarrollar la fuerza muscular (diferentes técnicas de fortalecimiento muscular con máquinas, con peso libre, con el propio peso corporal, con gomas elásticas, etc.)	Entre 45 y 60 minutos	2-3 días	No		No			No lo veo necesario para el nivel de arbitraje individual. Sin embargo, soy consciente que correr un poco (10 minutos) antes del partido es recomendable.	Al finalizar el partido
2021-10-29 14:30:48	Sí	2001-12-14	Hombre	177	57	Barcelona	Local, Regional/Autonómica	Local (2 años) Regional (2 años)	2020-2021	Categoría senior	7 o más partidos/semana	B2 Catalunya	Sí	No	Para mantener o desarrollar la fuerza muscular (diferentes técnicas de fortalecimiento muscular con máquinas, con peso libre, con el propio peso corporal, con gomas elásticas, etc.)	Más de 60 minutos	1 día	No		No				Durante el calentamiento inicial
2021-10-29 14:31:50	Sí	1998-06-13	Mujer	1.65	56	Barcelona	Local, Regional/Autonómica	4 años total	2020-2021	Categoría senior	Entre 4 y 5 partidos/semana	Comite B2	Sí	Sí	Para mantener o desarrollar la resistencia aeróbica (natación, ciclismo, carrera, saltar a la comba, etc.), Para mantener o desarrollar la fuerza muscular (diferentes técnicas de fortalecimiento muscular con máquinas, con peso libre, con el propio peso corporal, con gomas elásticas, etc.)	Más de 60 minutos	4-5 días	Sí	5 - 10 min	Sí	Estiramientos y movilidad articular, Técnicas de manejo de la respiración (activación/relajación, conciencia)	Salir mas concentrada y con una activación muscular		En el descanso entre primer y segundo cuarto, Durante el descanso entre mitades, En el descanso entre tercer y último cuarto
[truncated: 640 more rows]
